# Supplementary material for: Global Analysis of Intercellular Homeodomain Protein Transfer
Source: PubMed Central journal article supplement — Cell Rep. Author manuscript; Available in PMC 2022 Sep 14. (PMC9472292; doi:10.1016/j.celrep.2019.06.056), 2019-07-16

***Lee et al. \_Supplemental Dataset 2***

HP/EGFP immunostaining images for Figure 2





































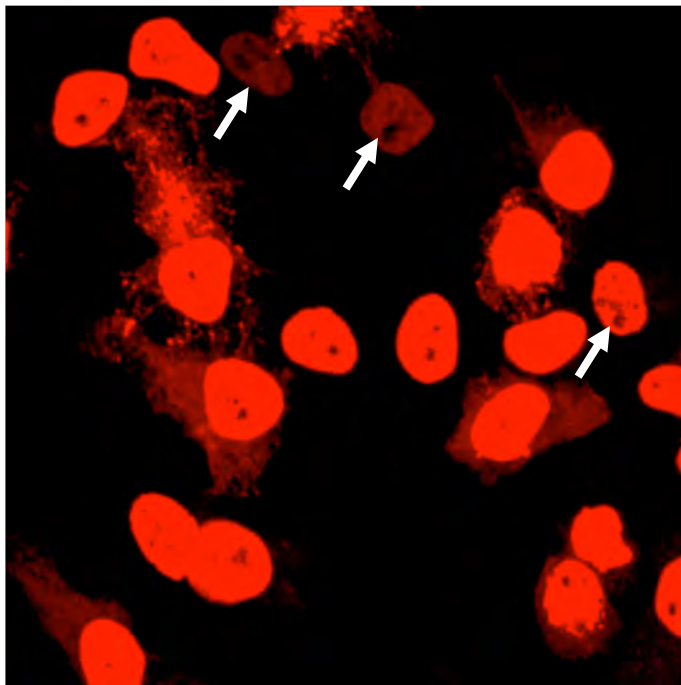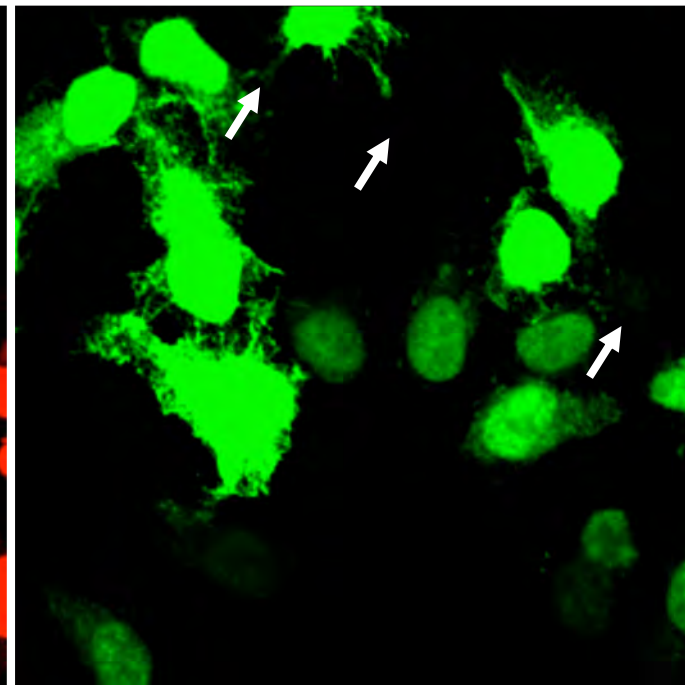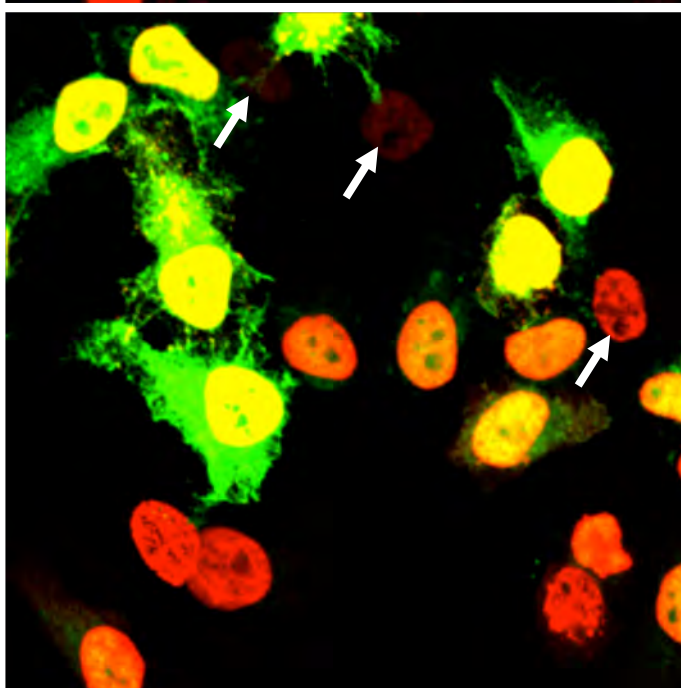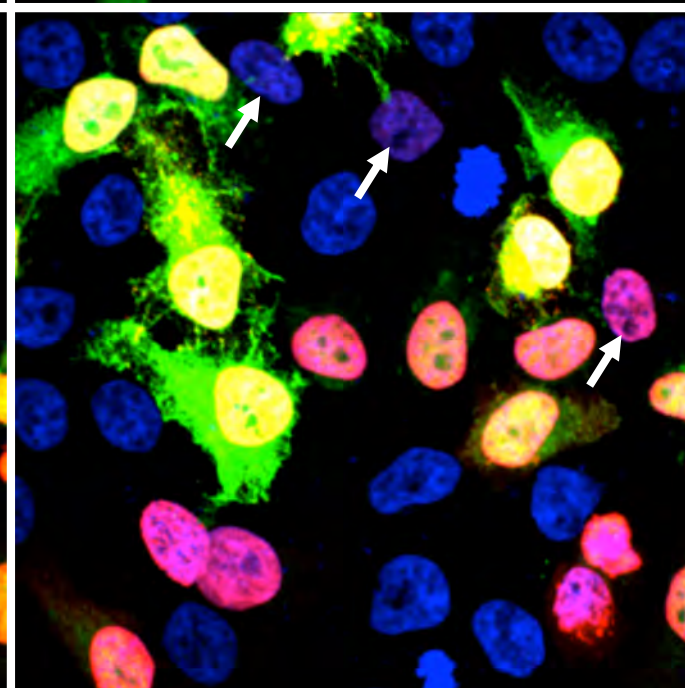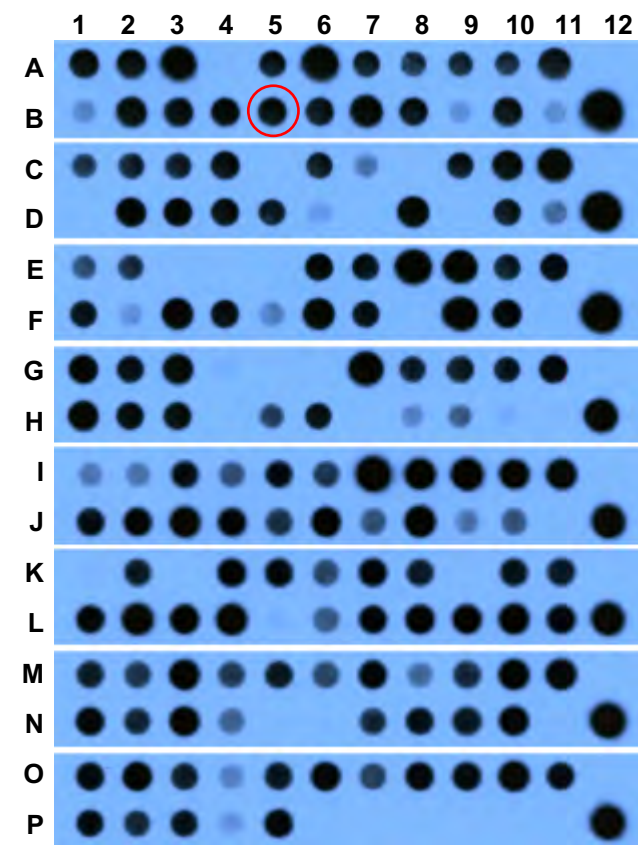



























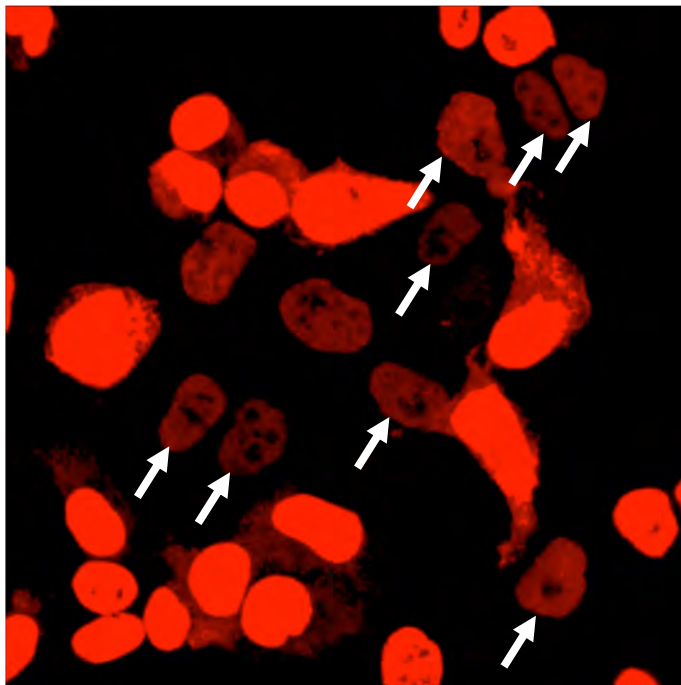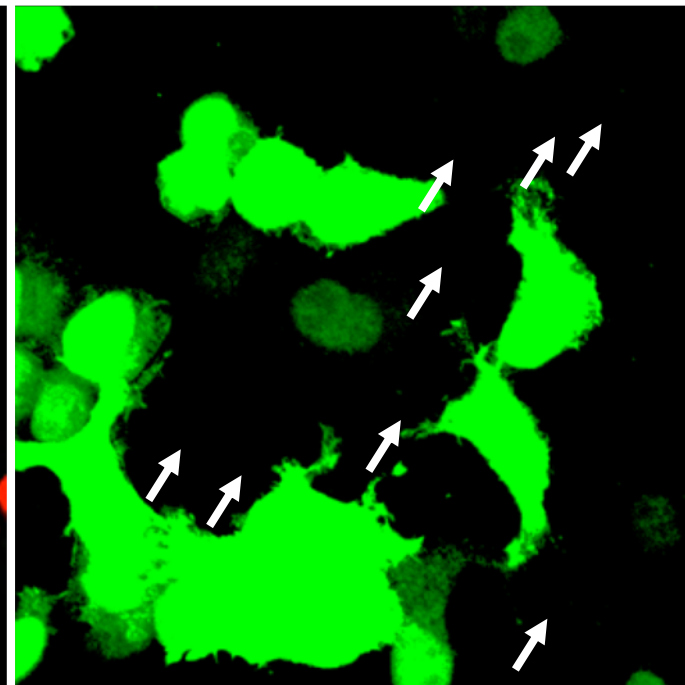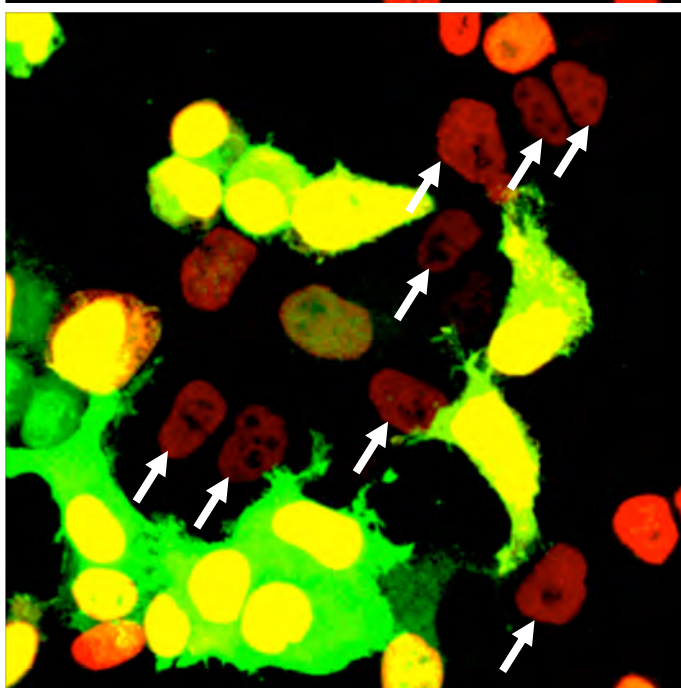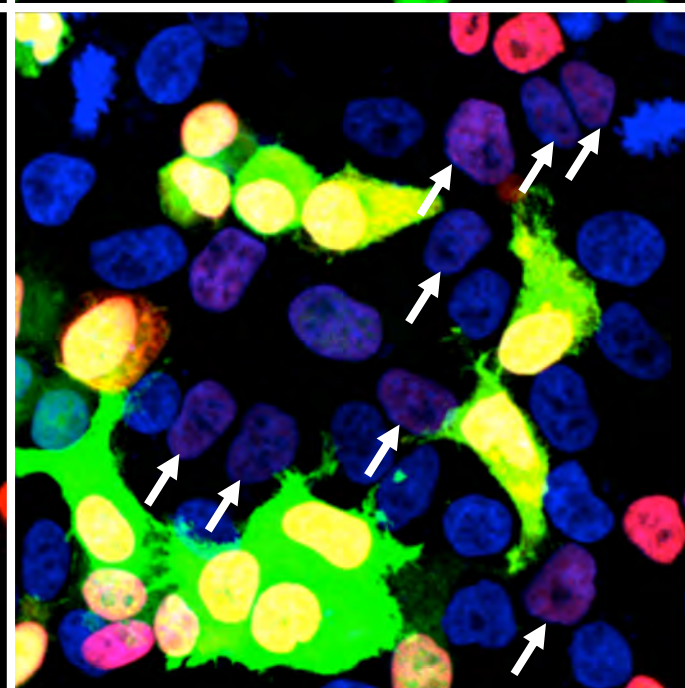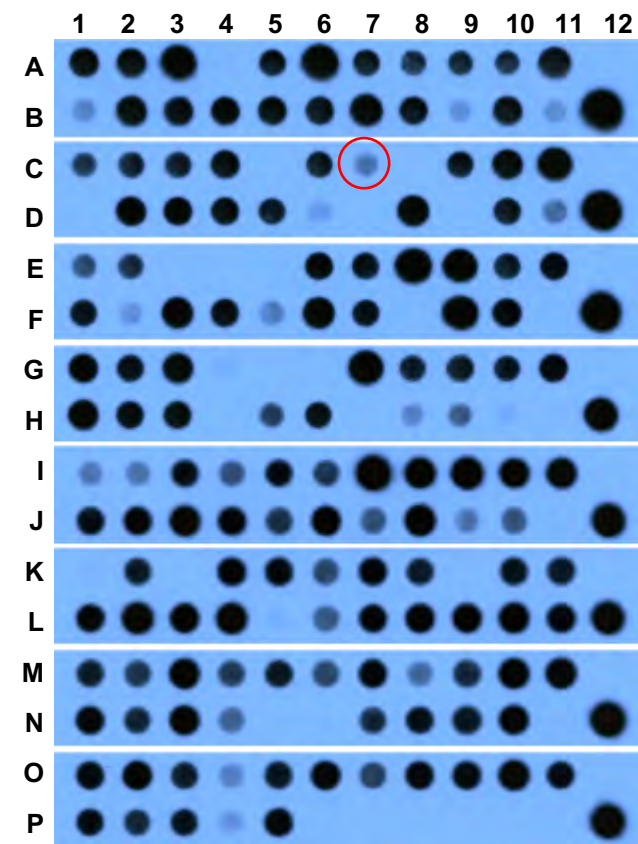





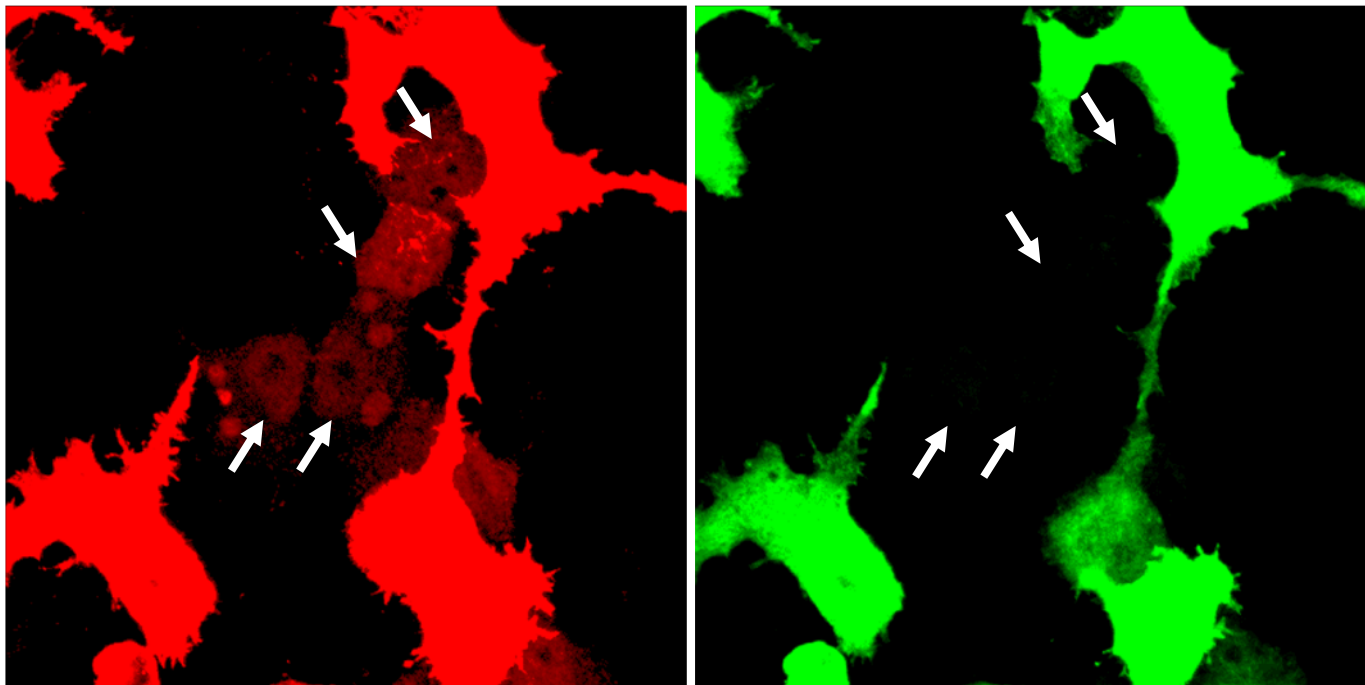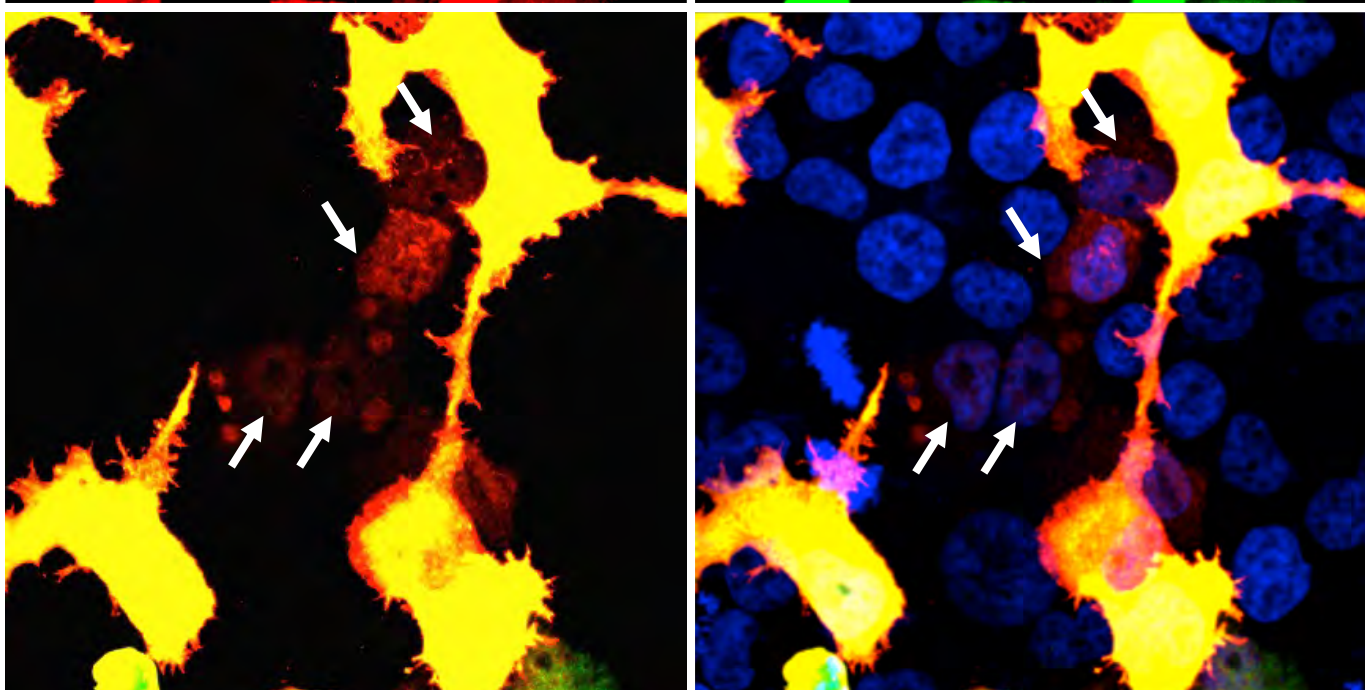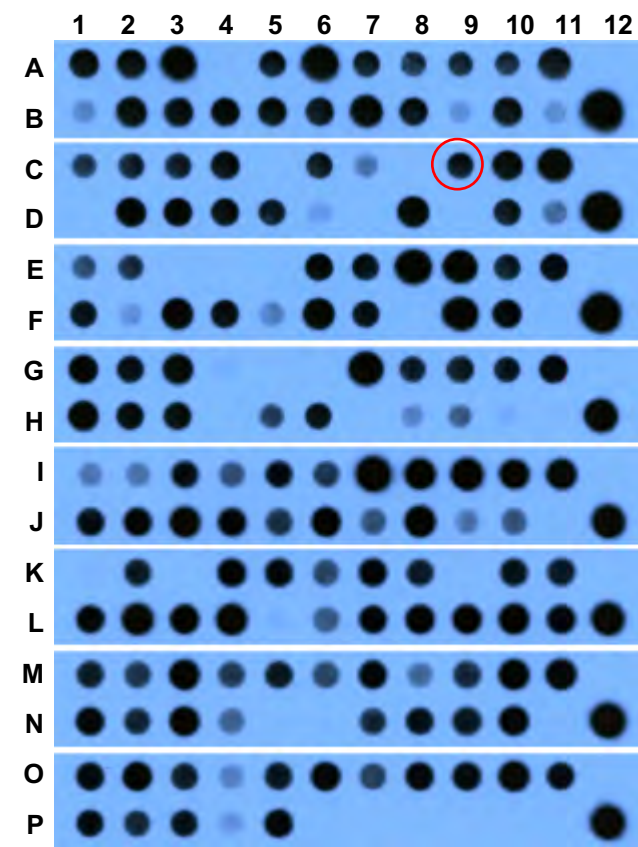





Ej034-HOPX (60xz, zoom1.7)

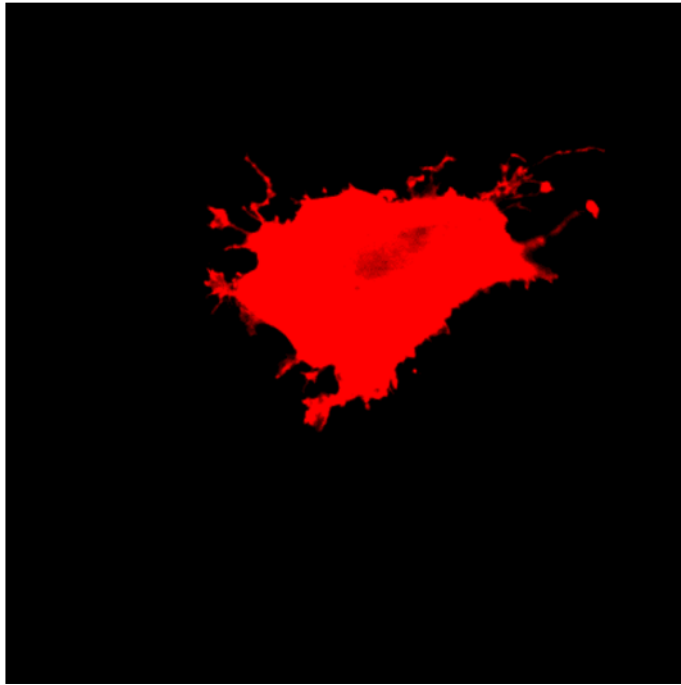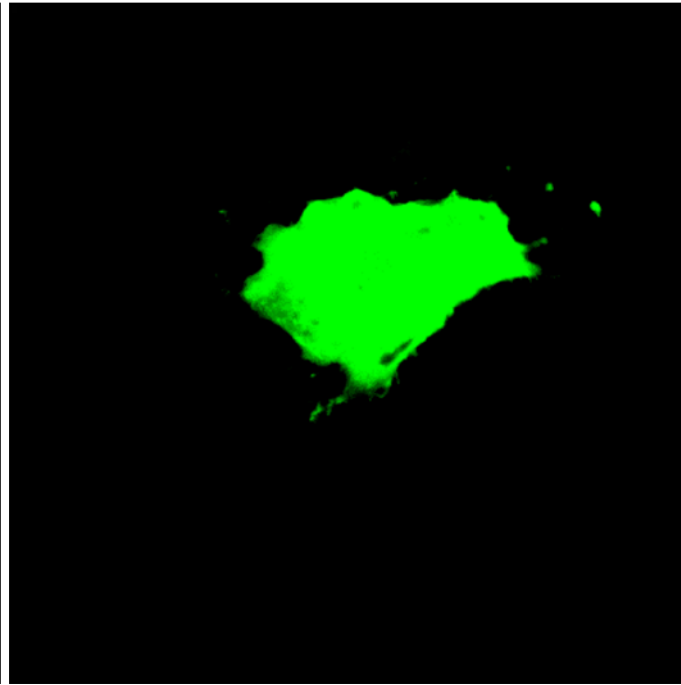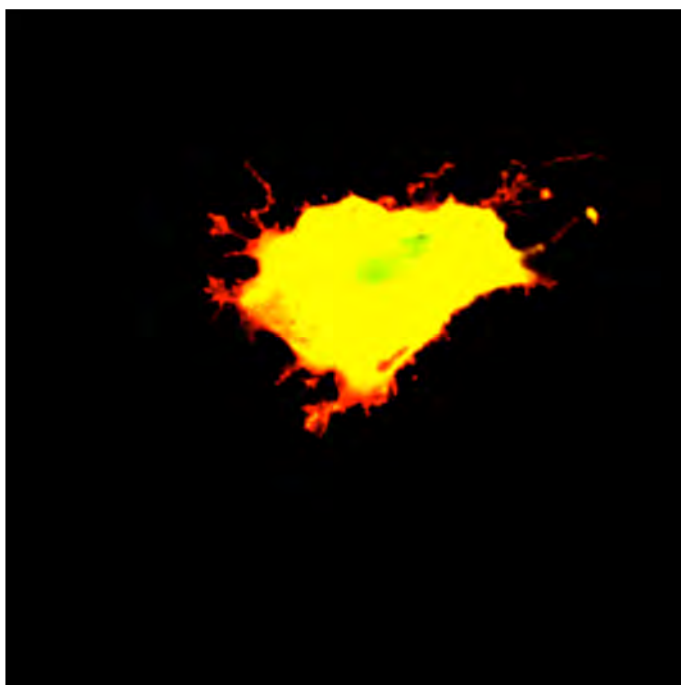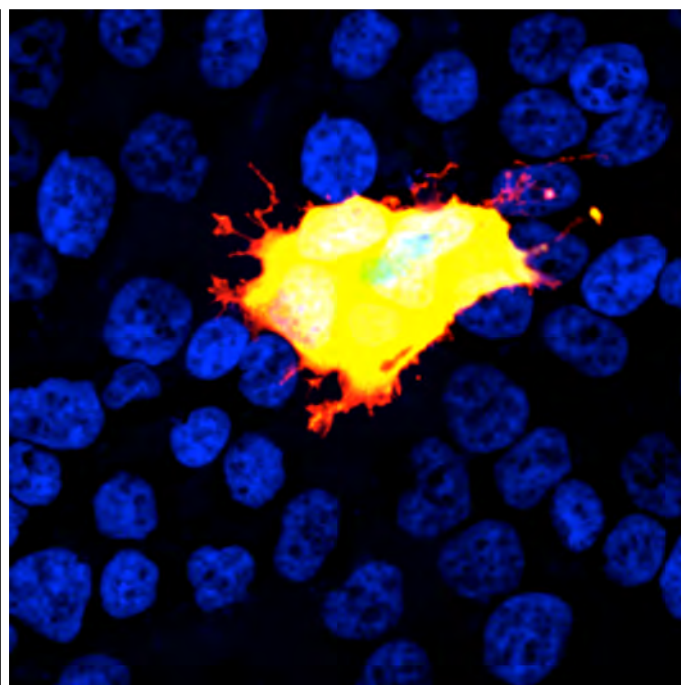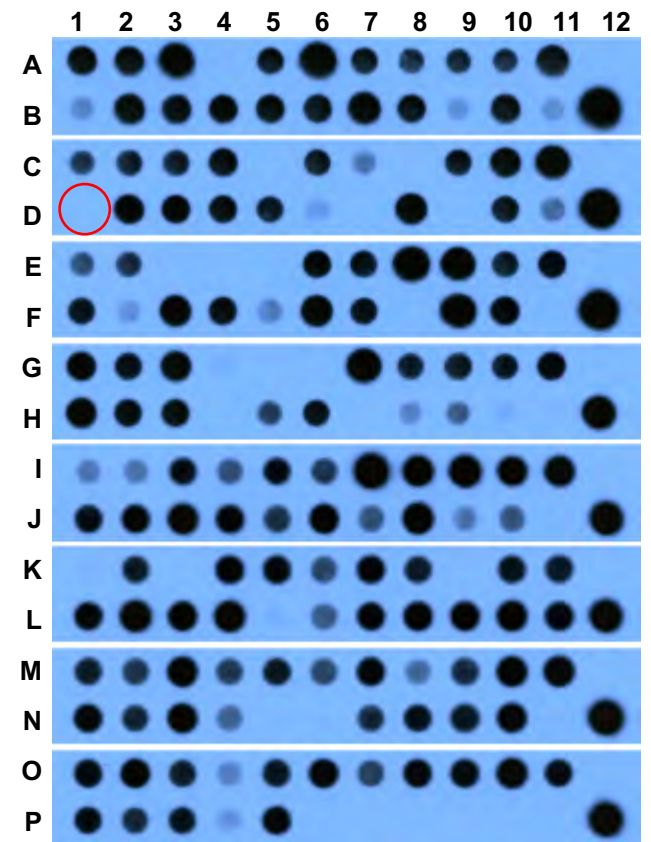





























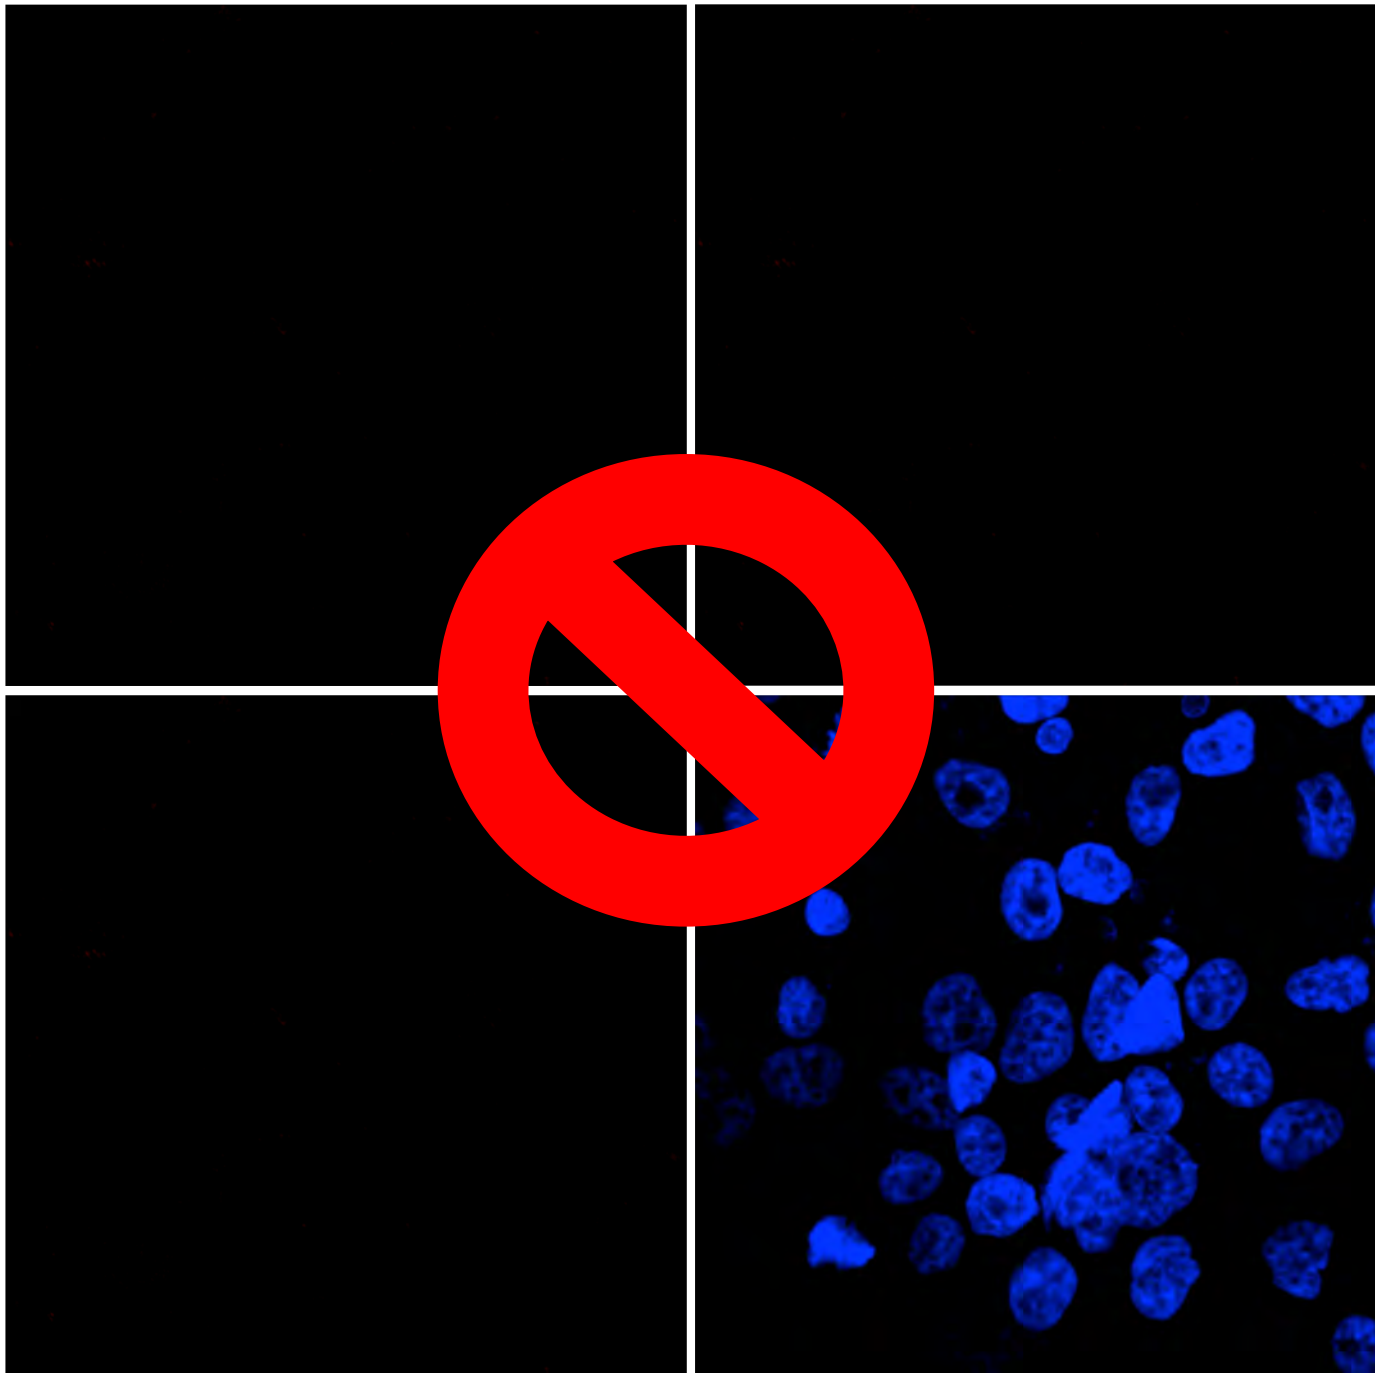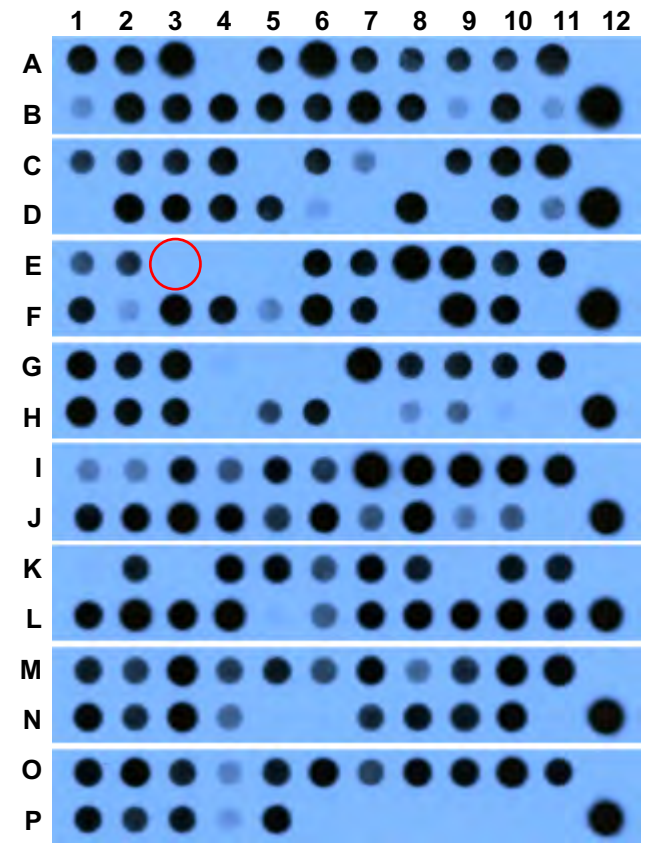





Ej050-HOXC4 (60xz, zoom1.7)

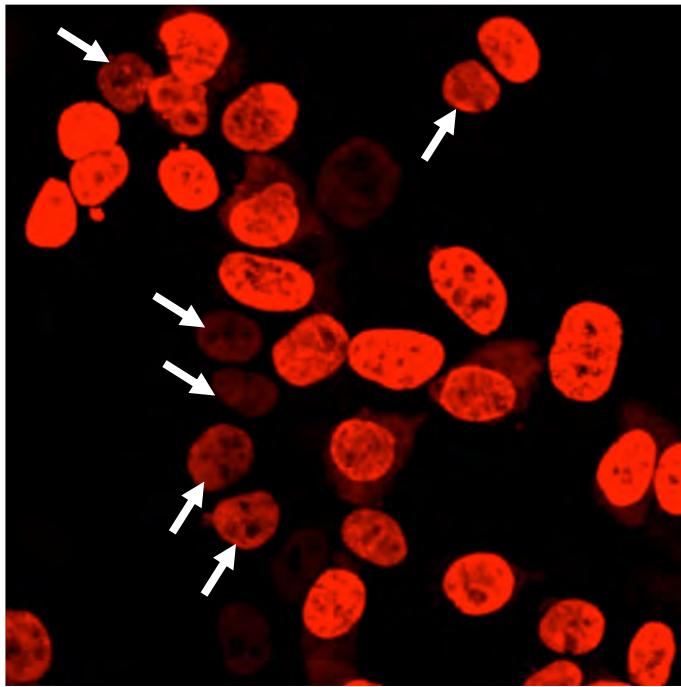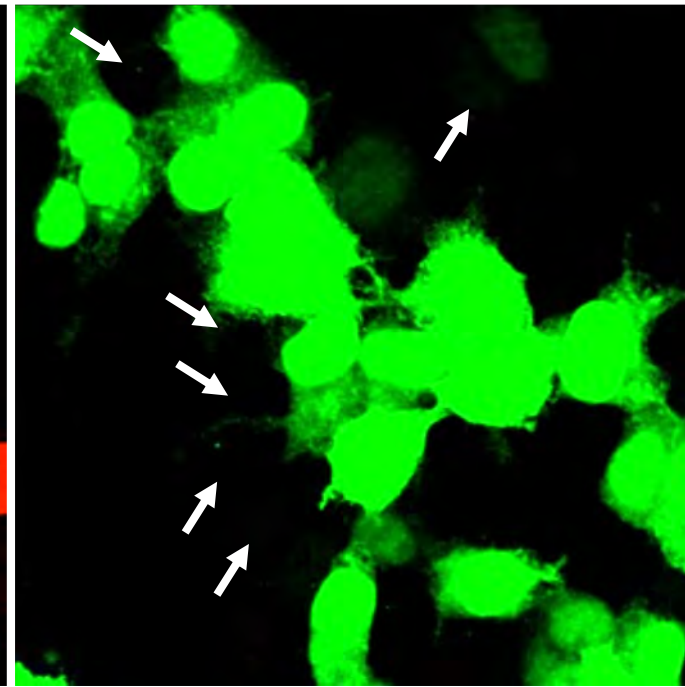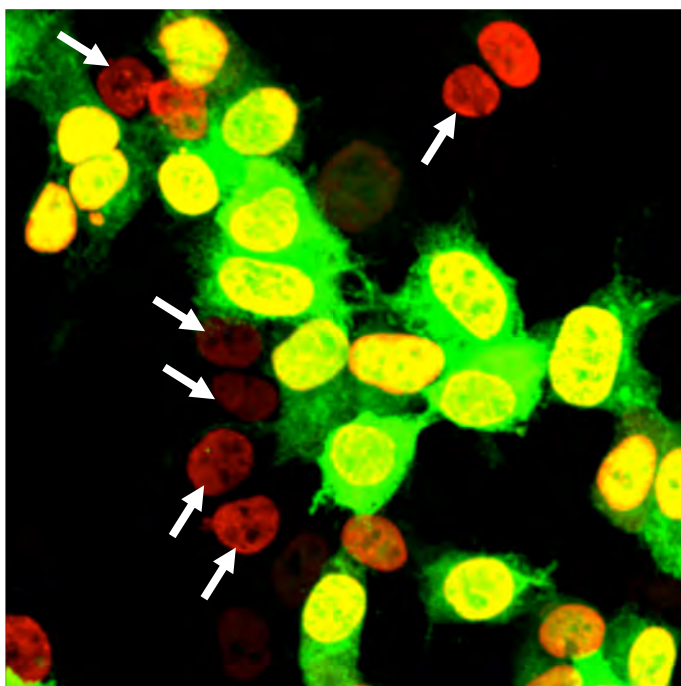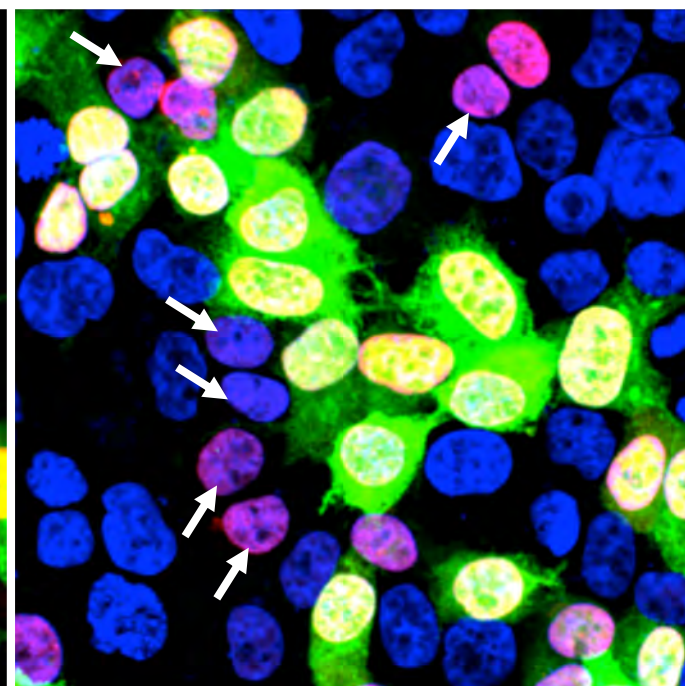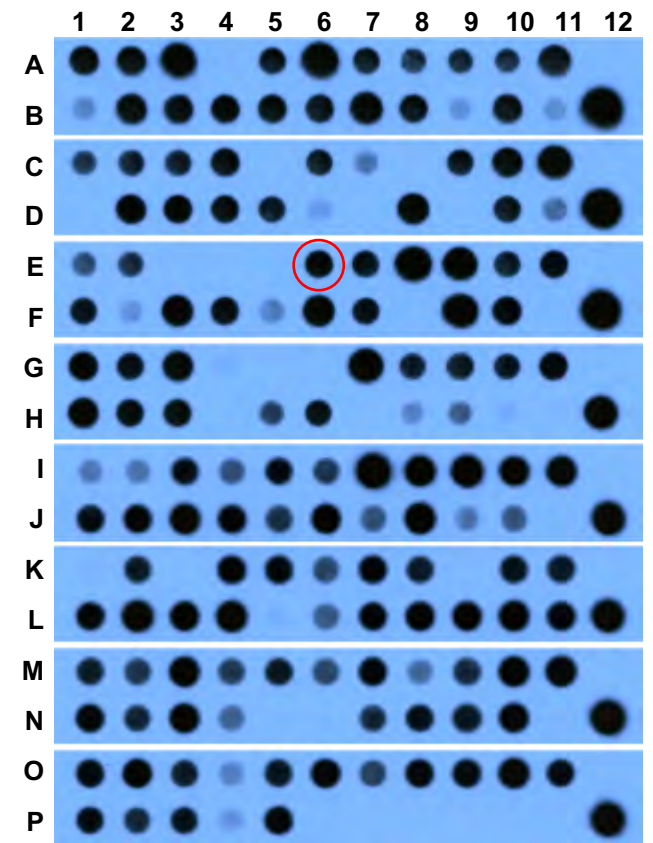



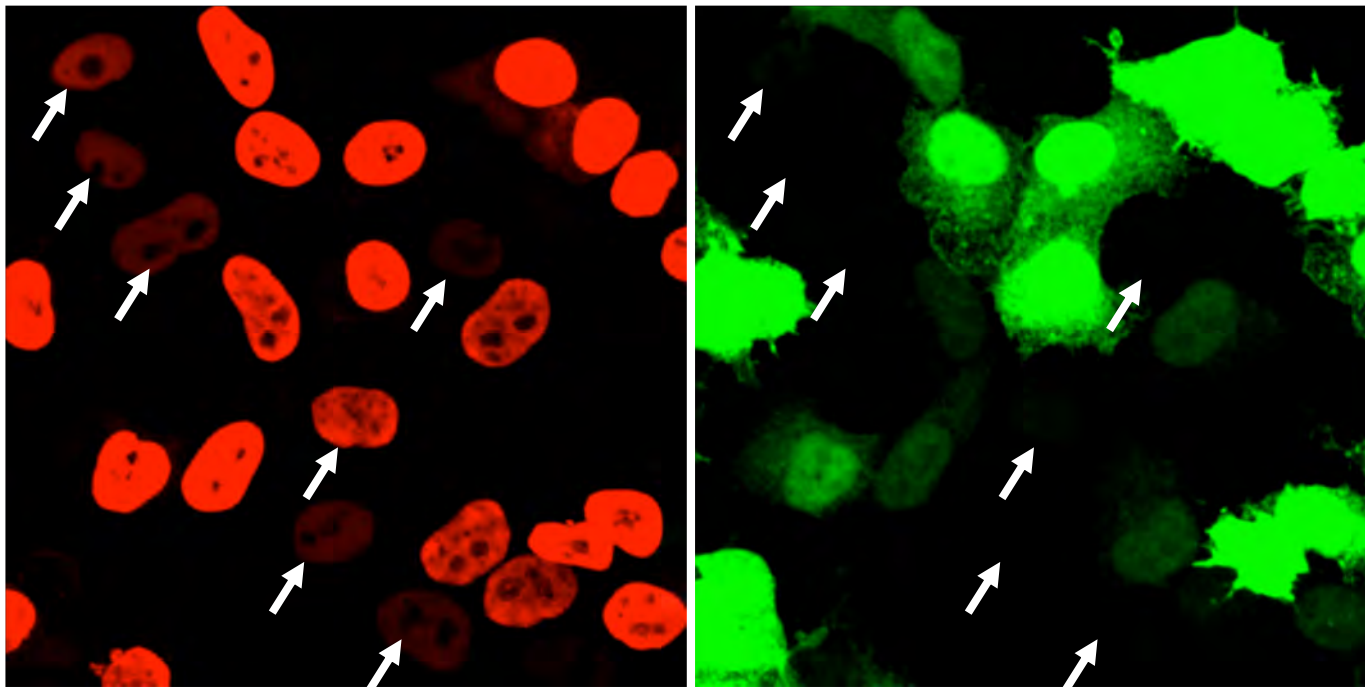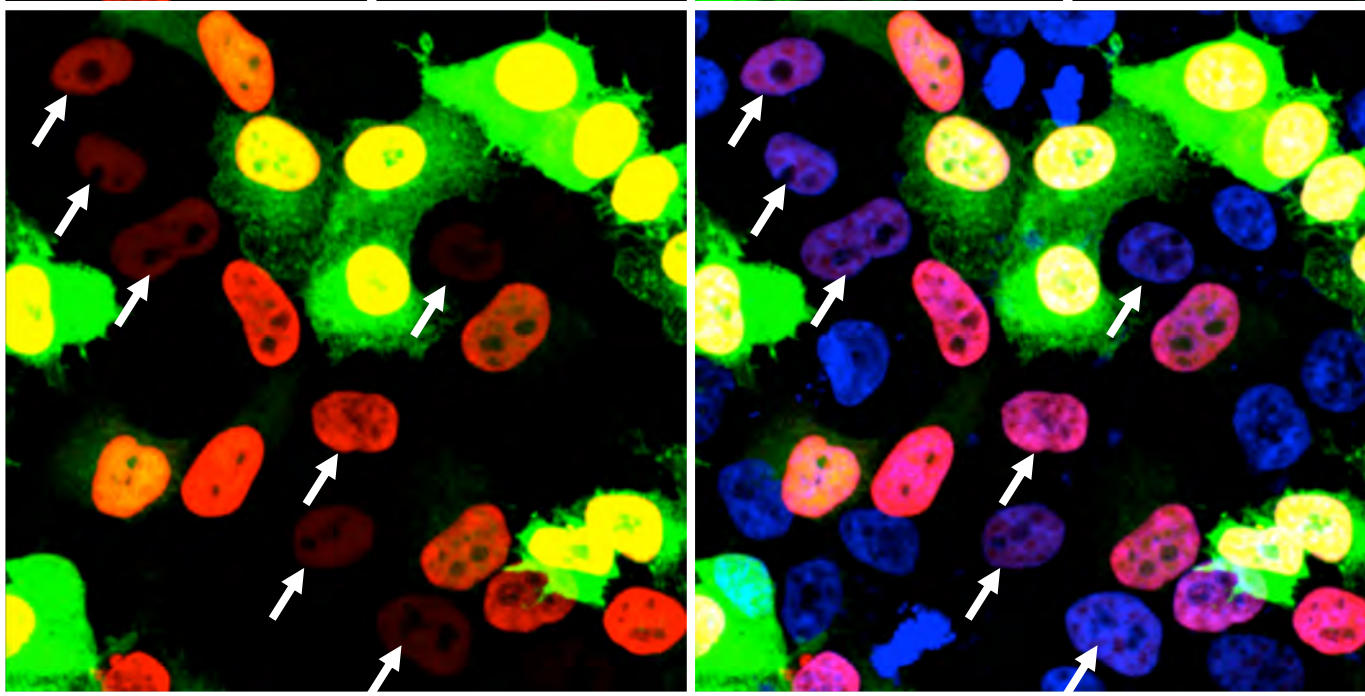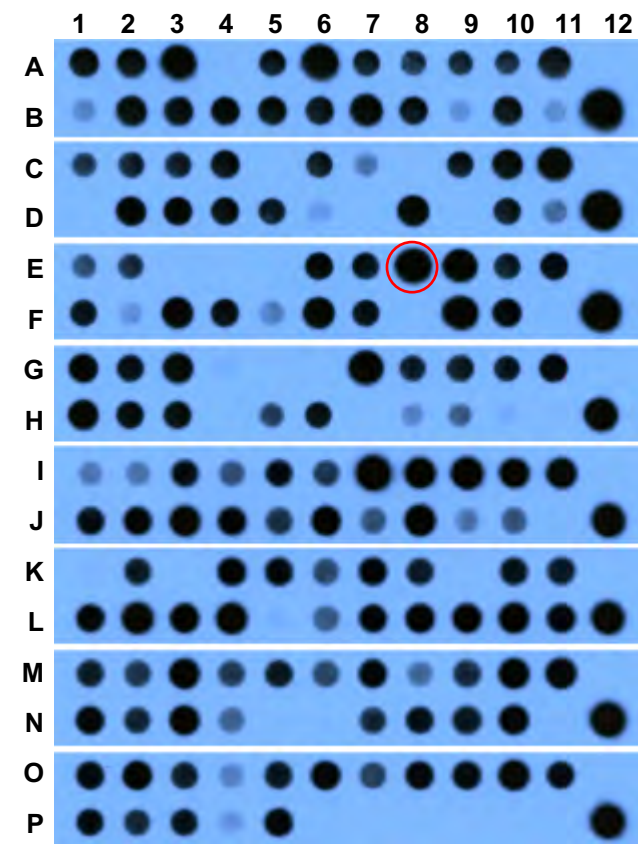

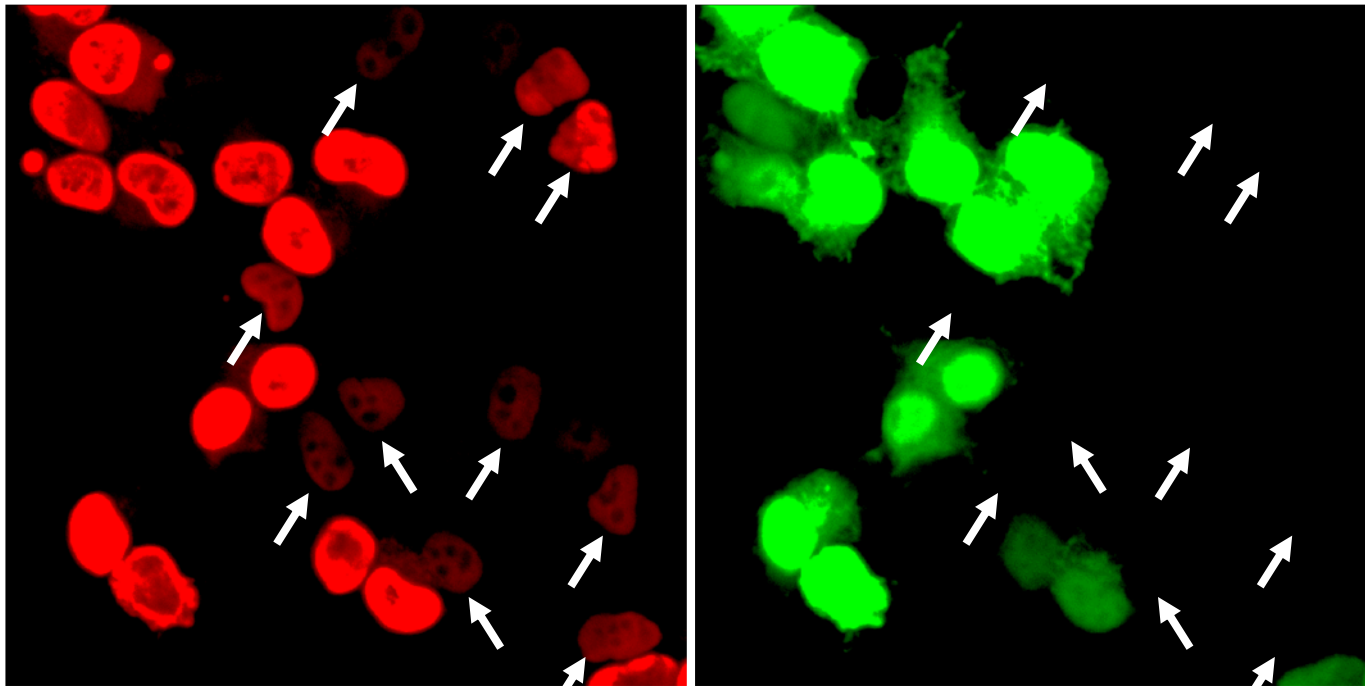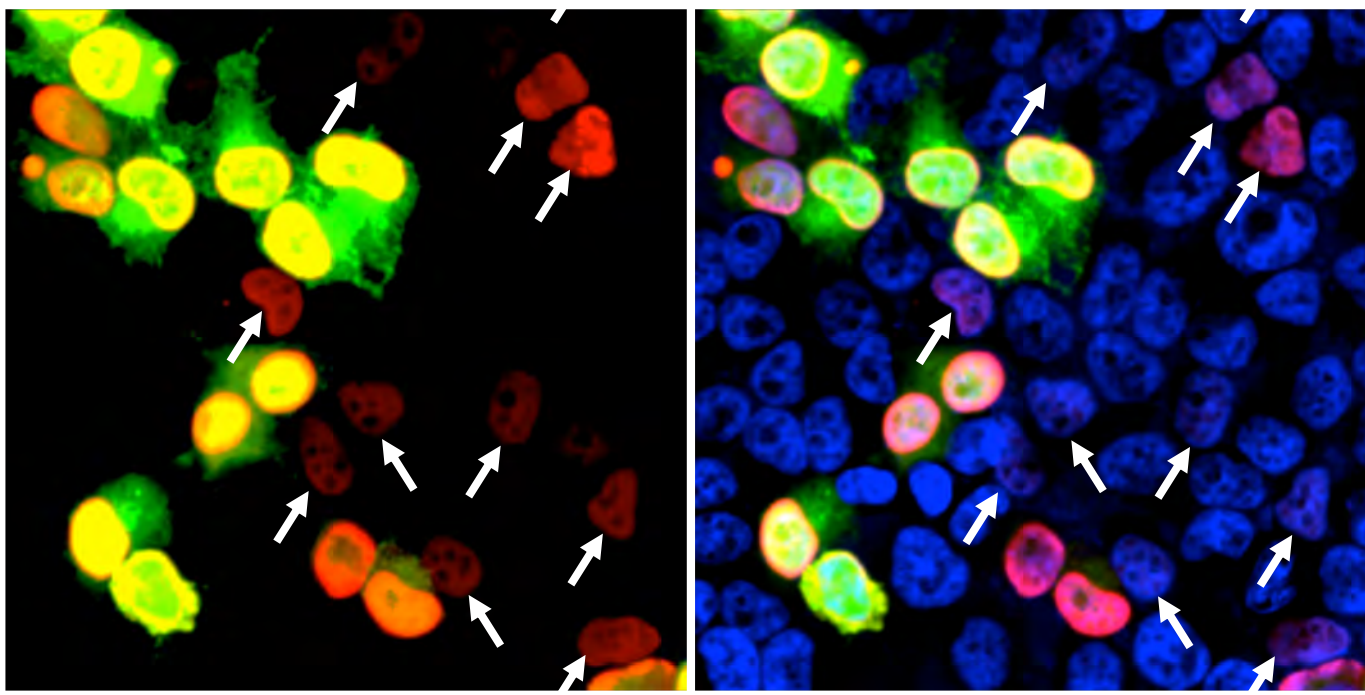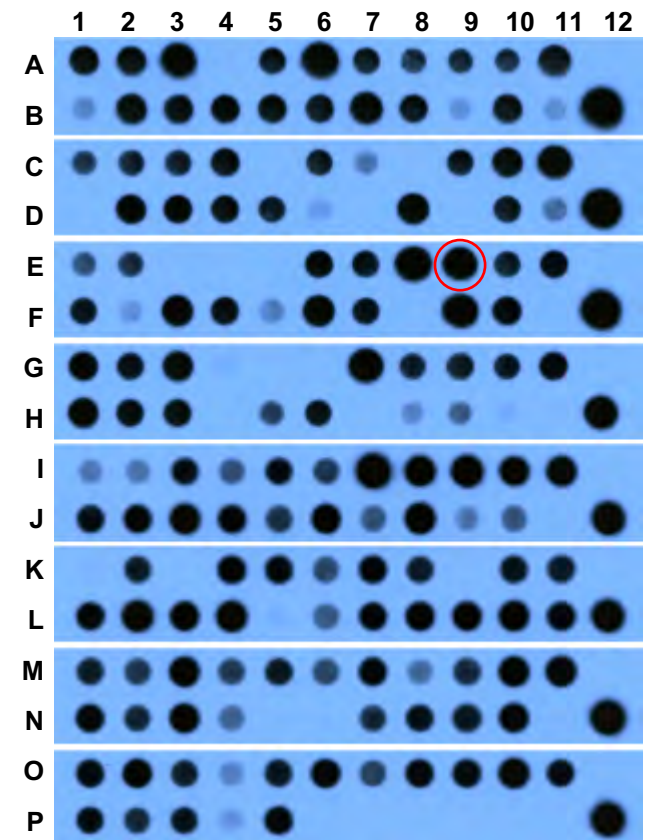

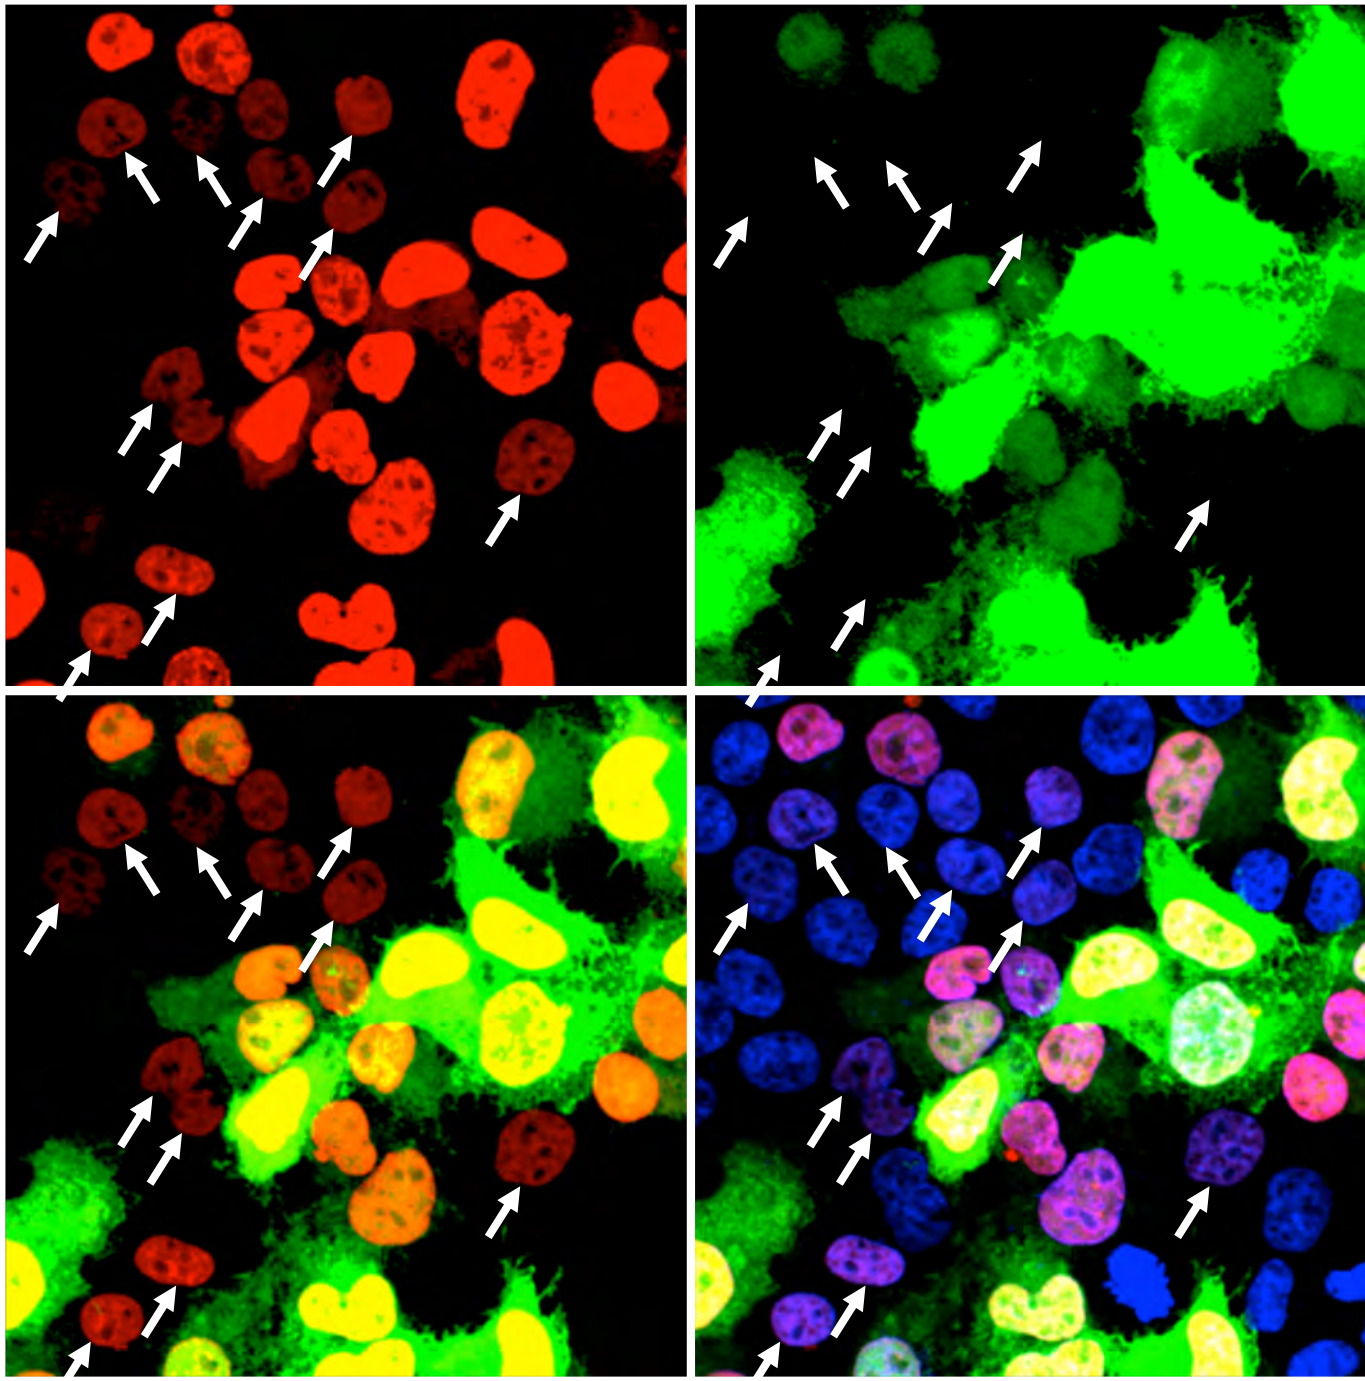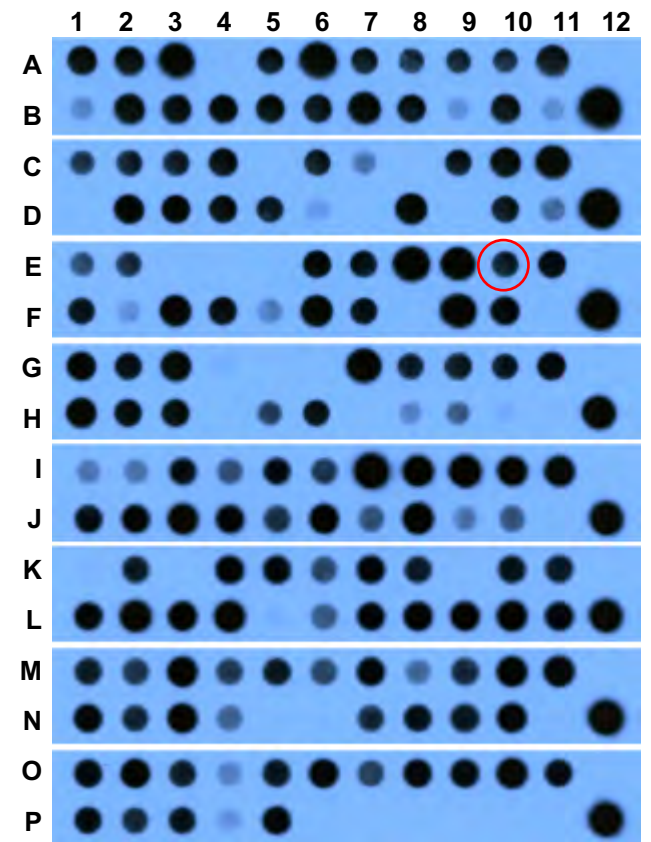

























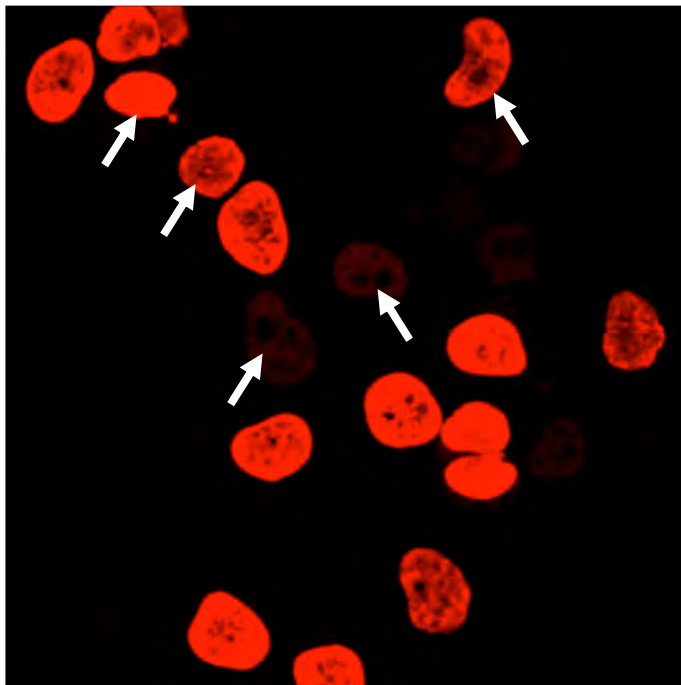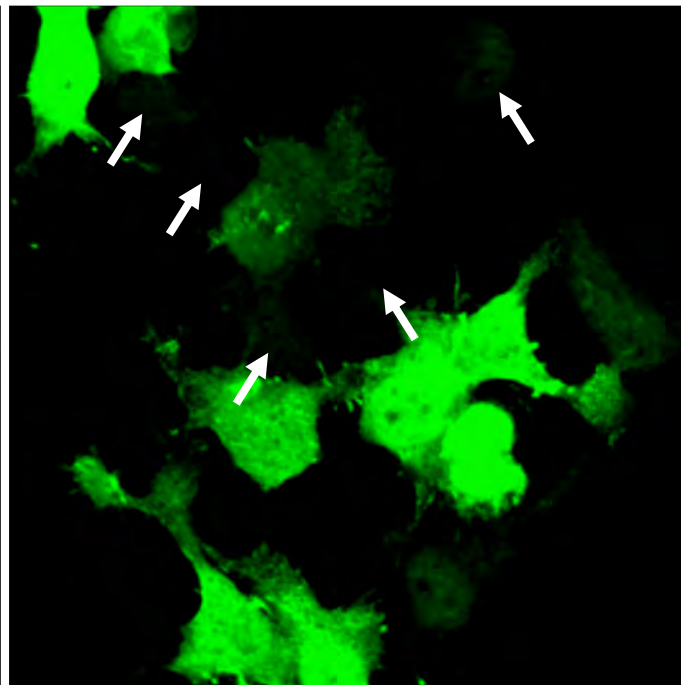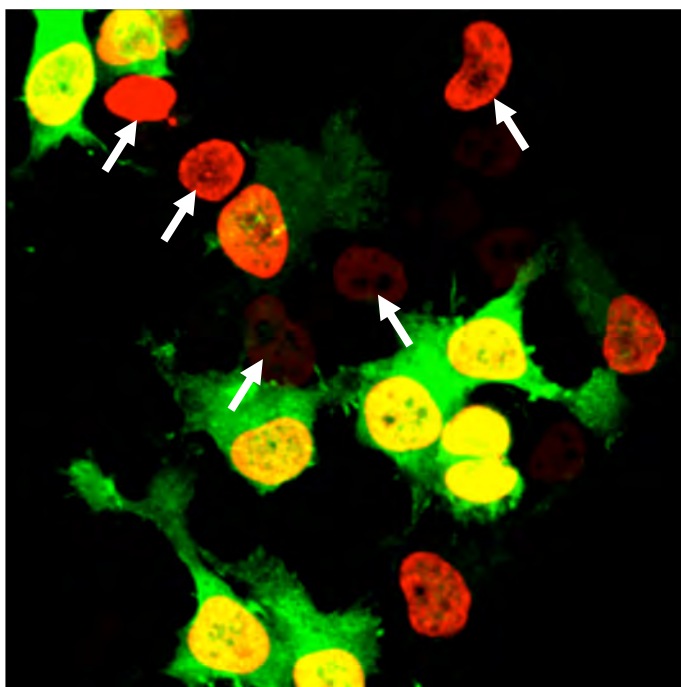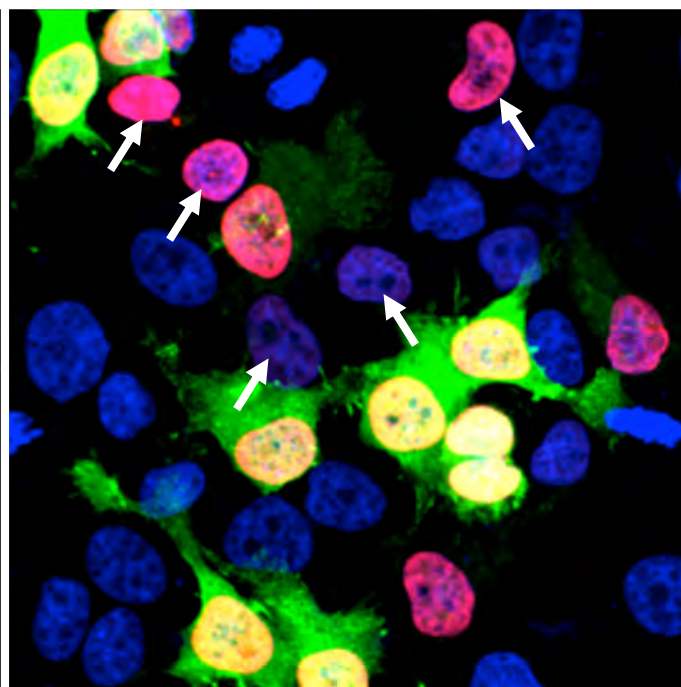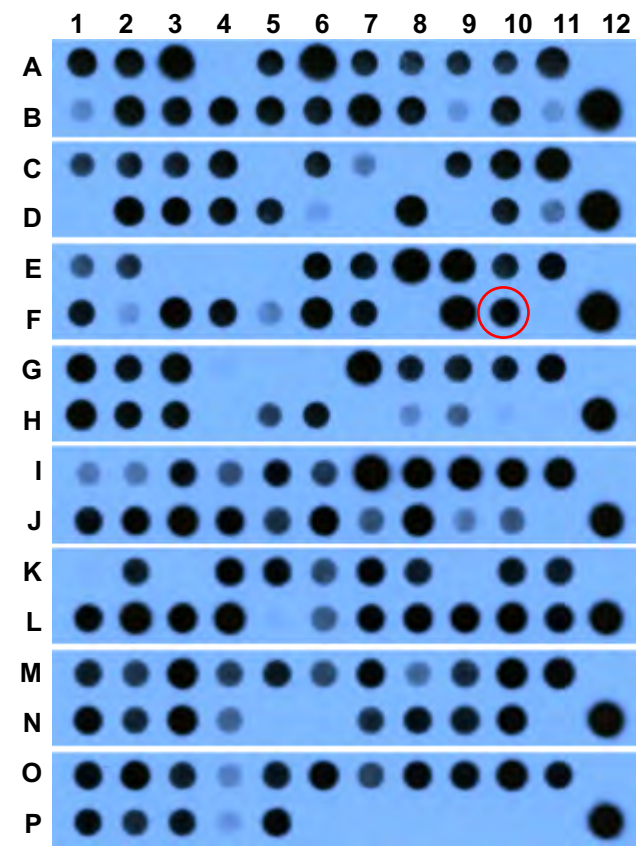

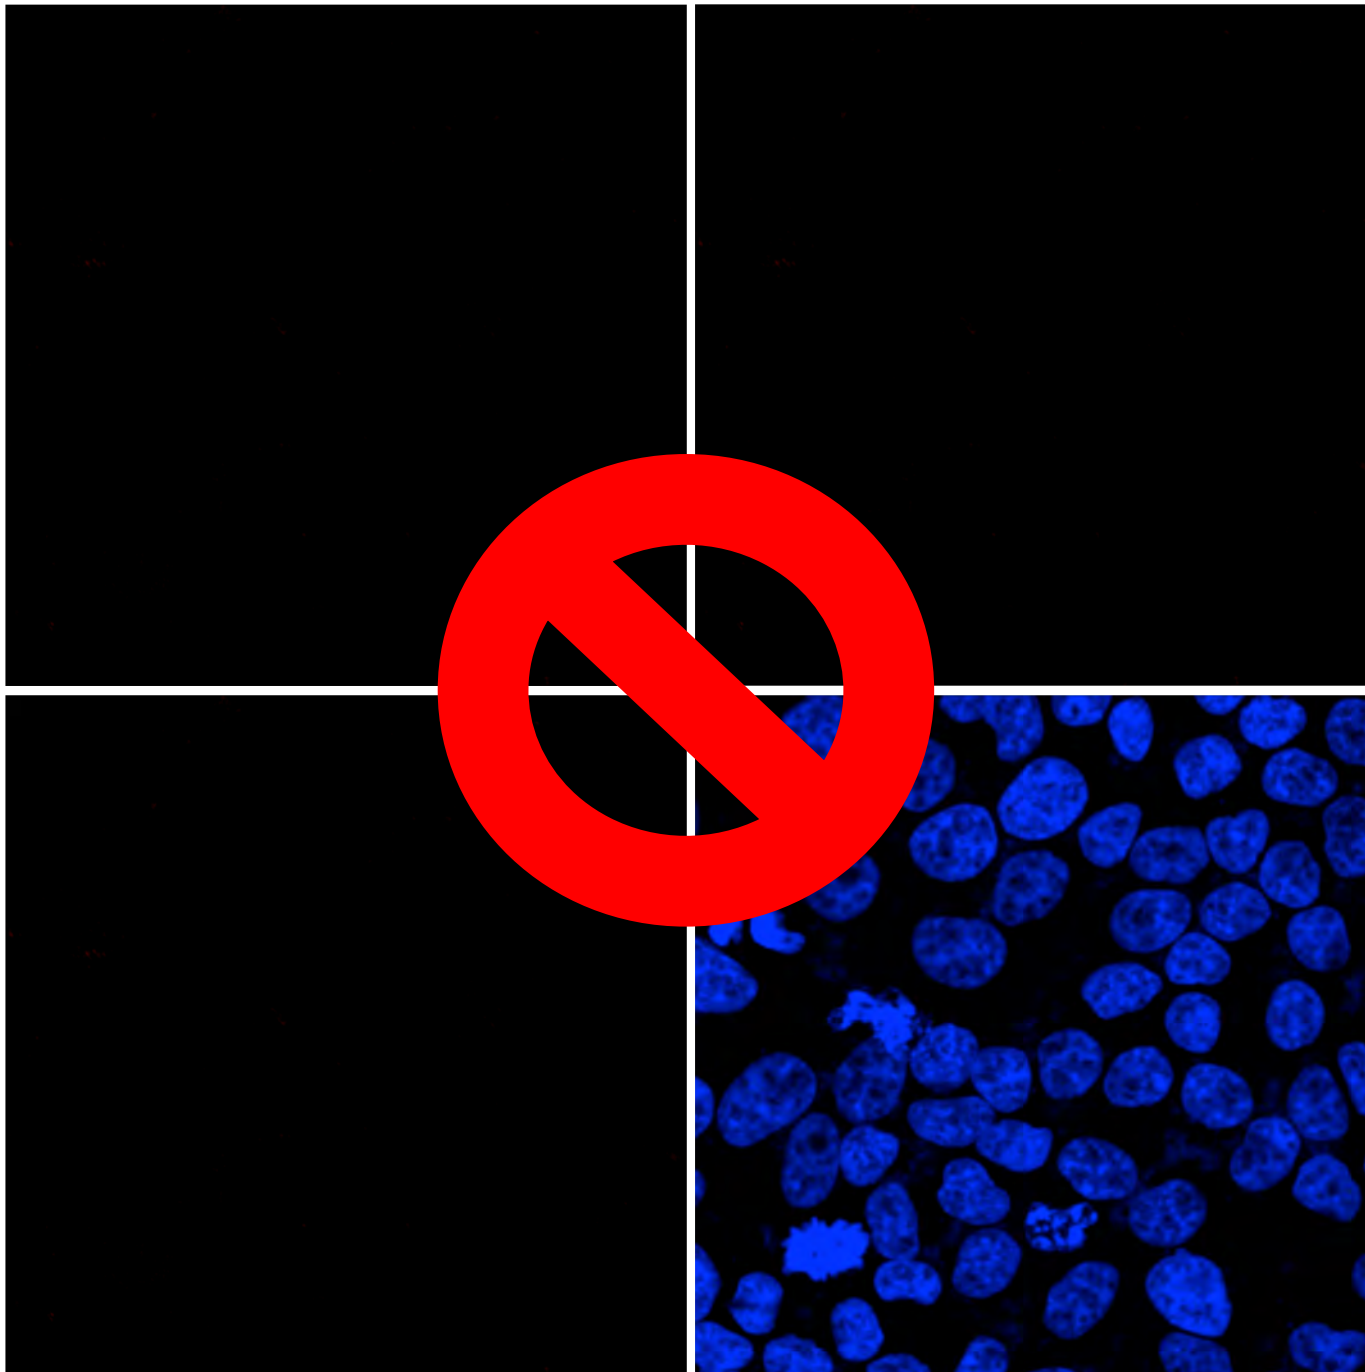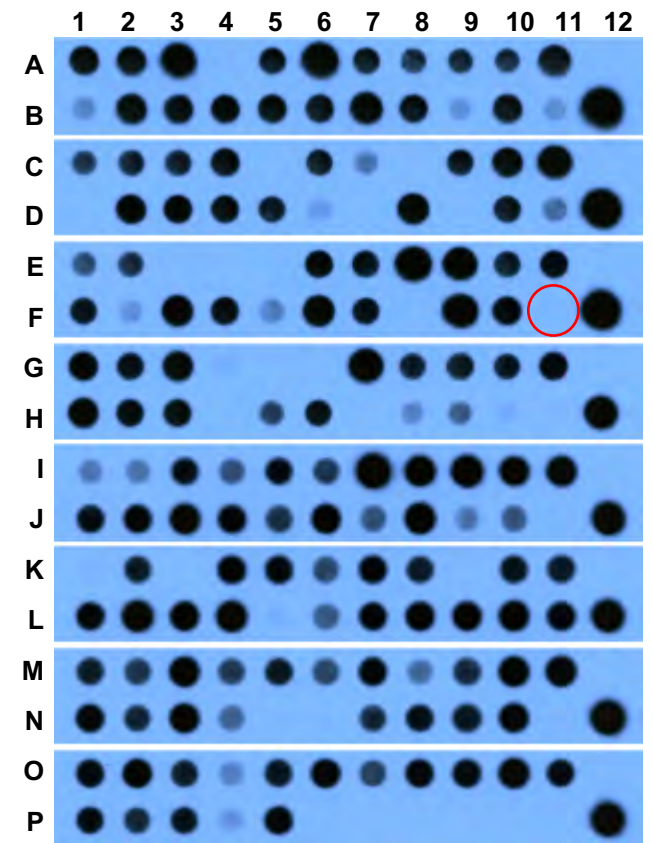













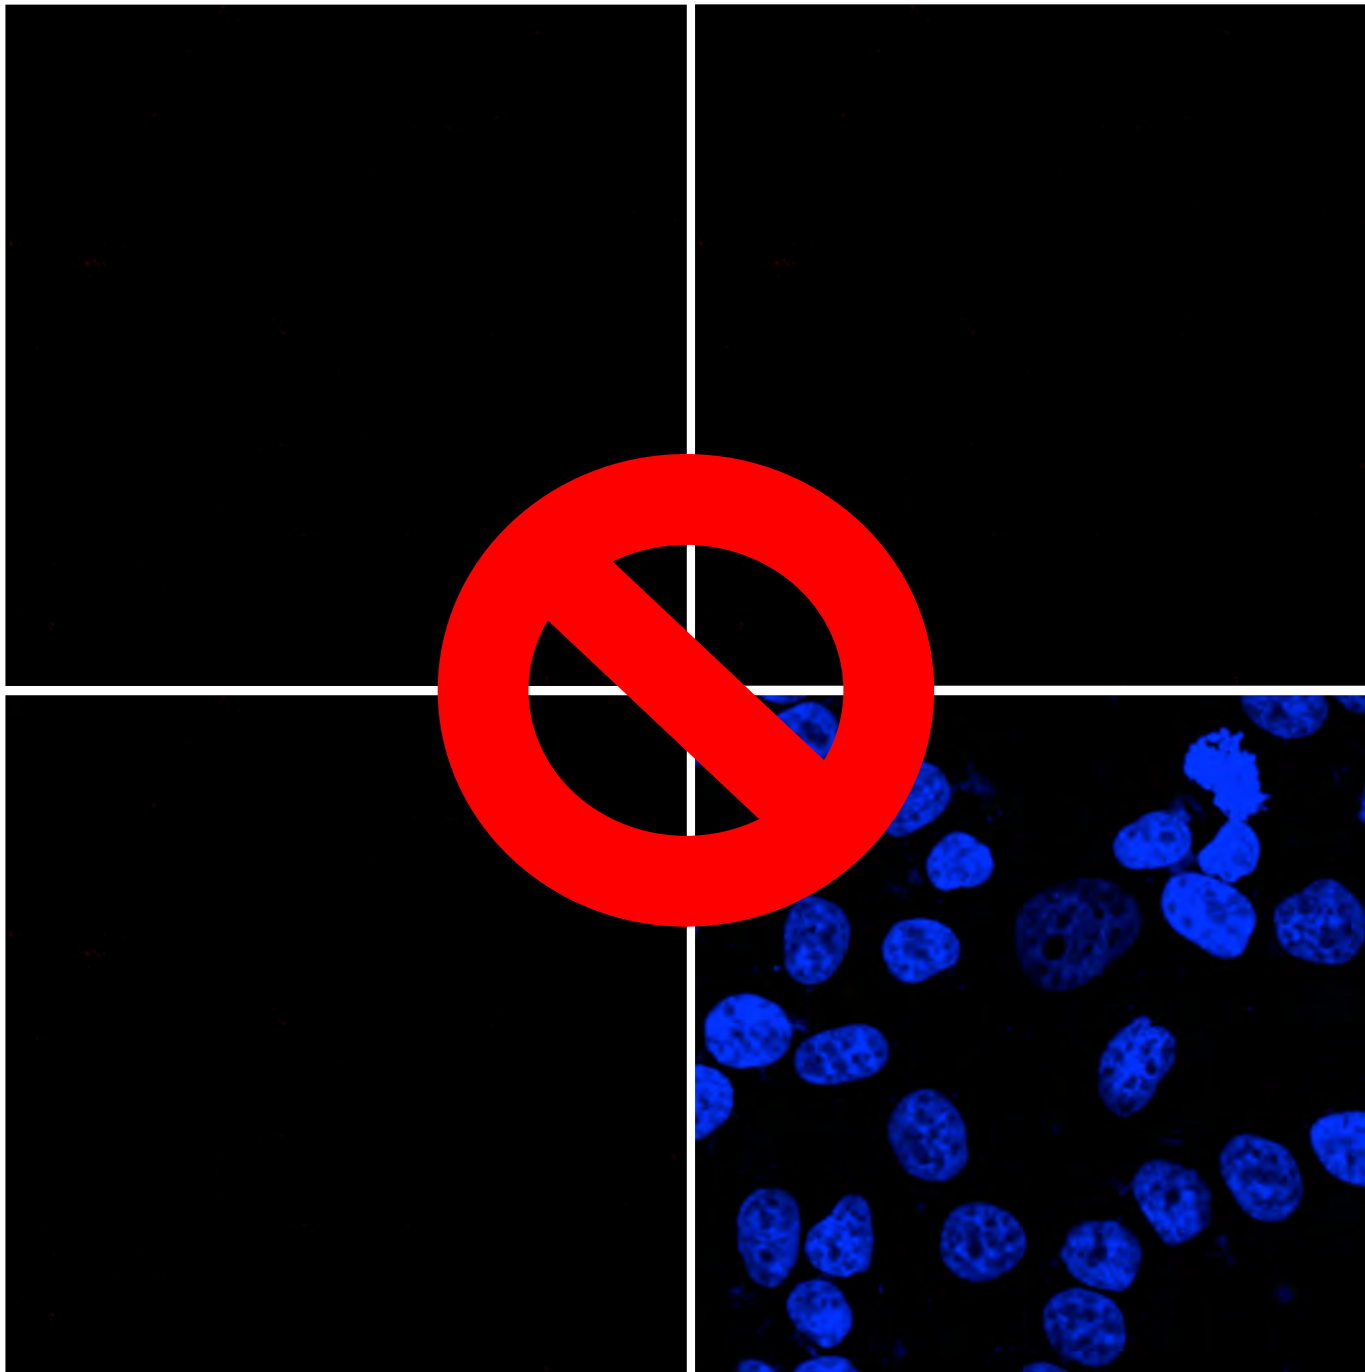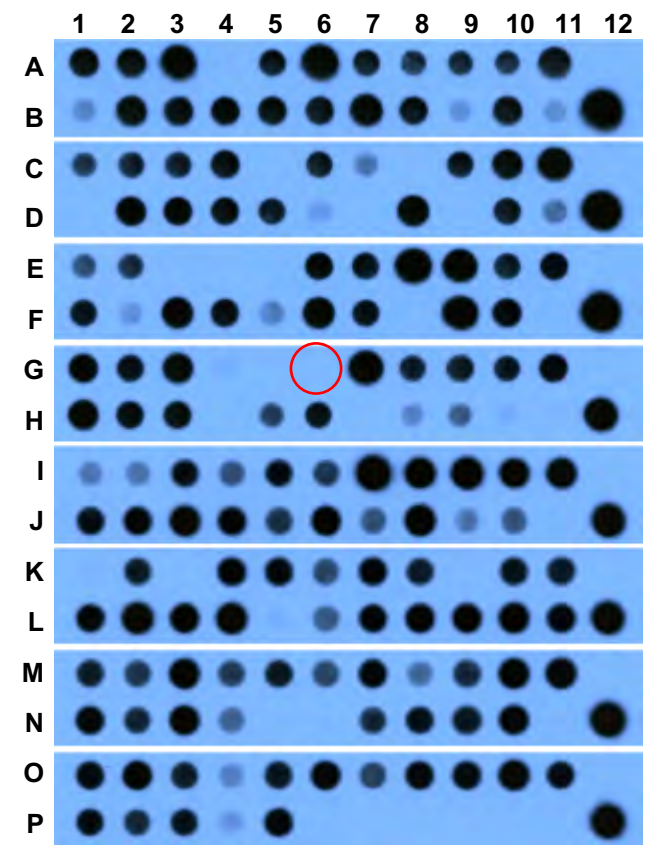







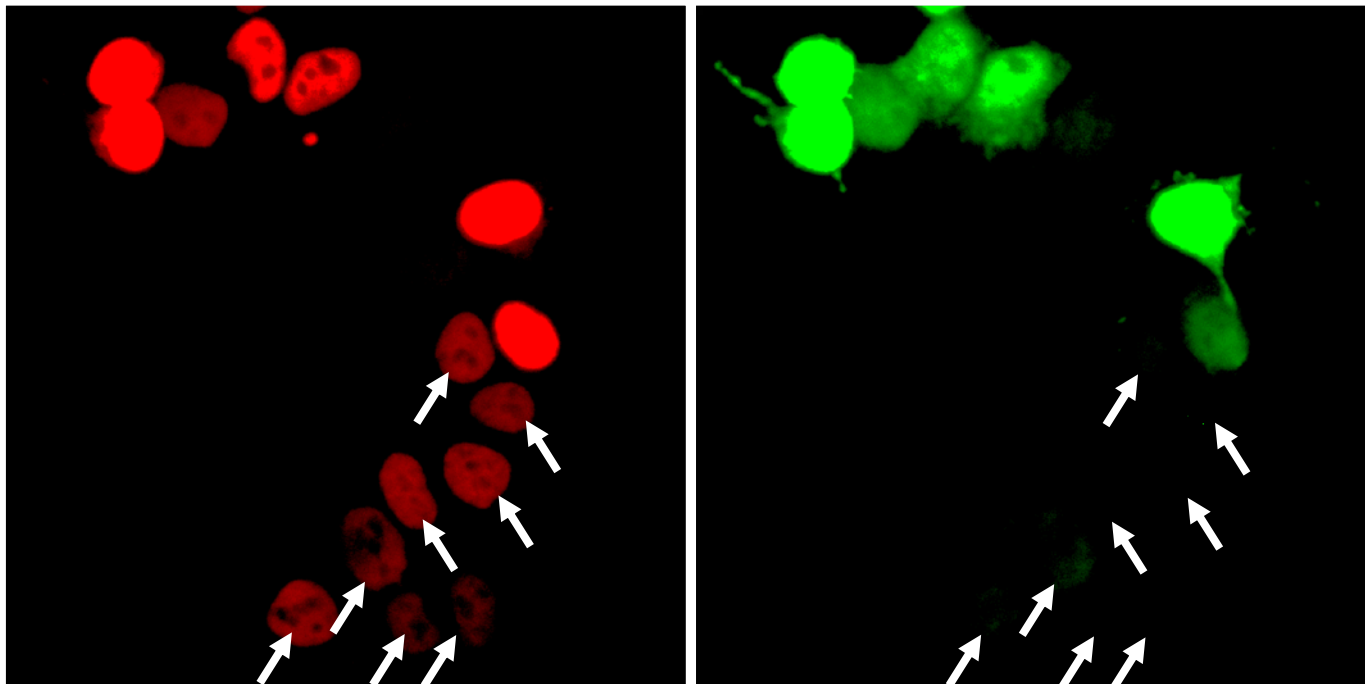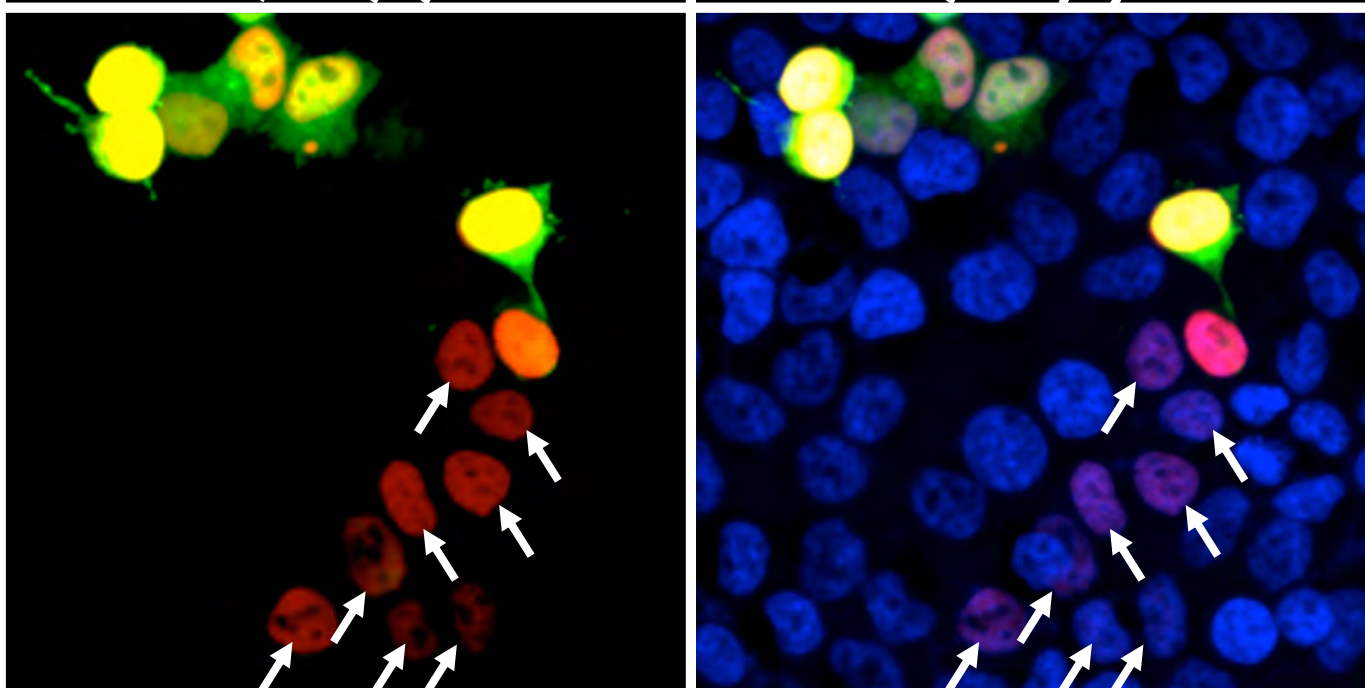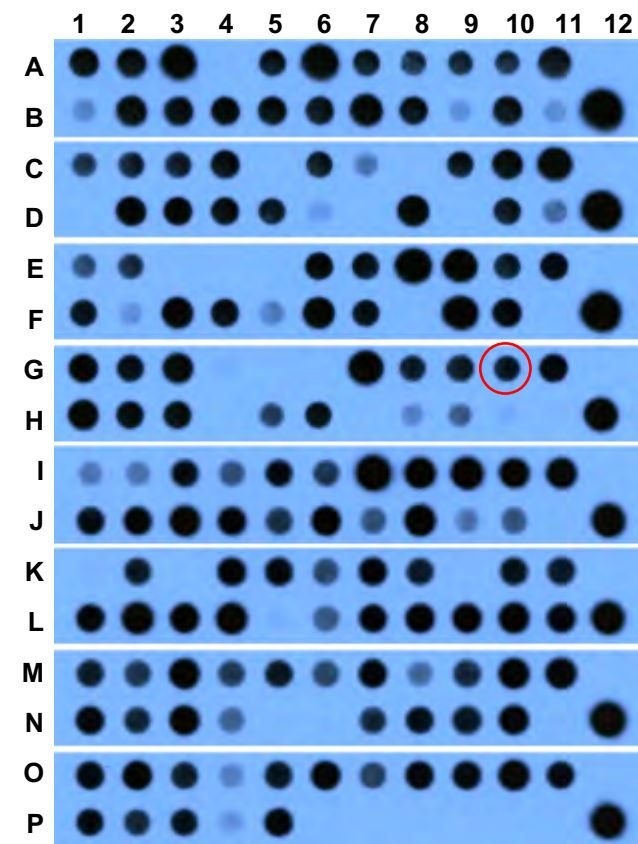

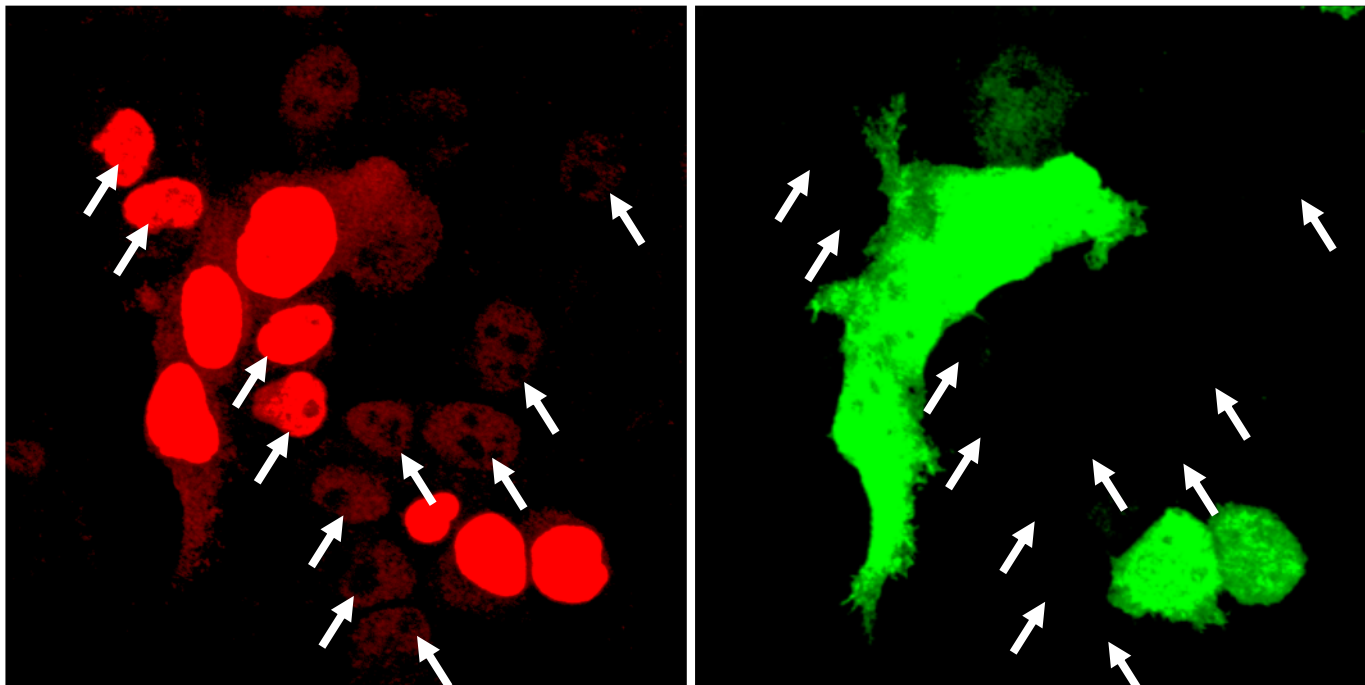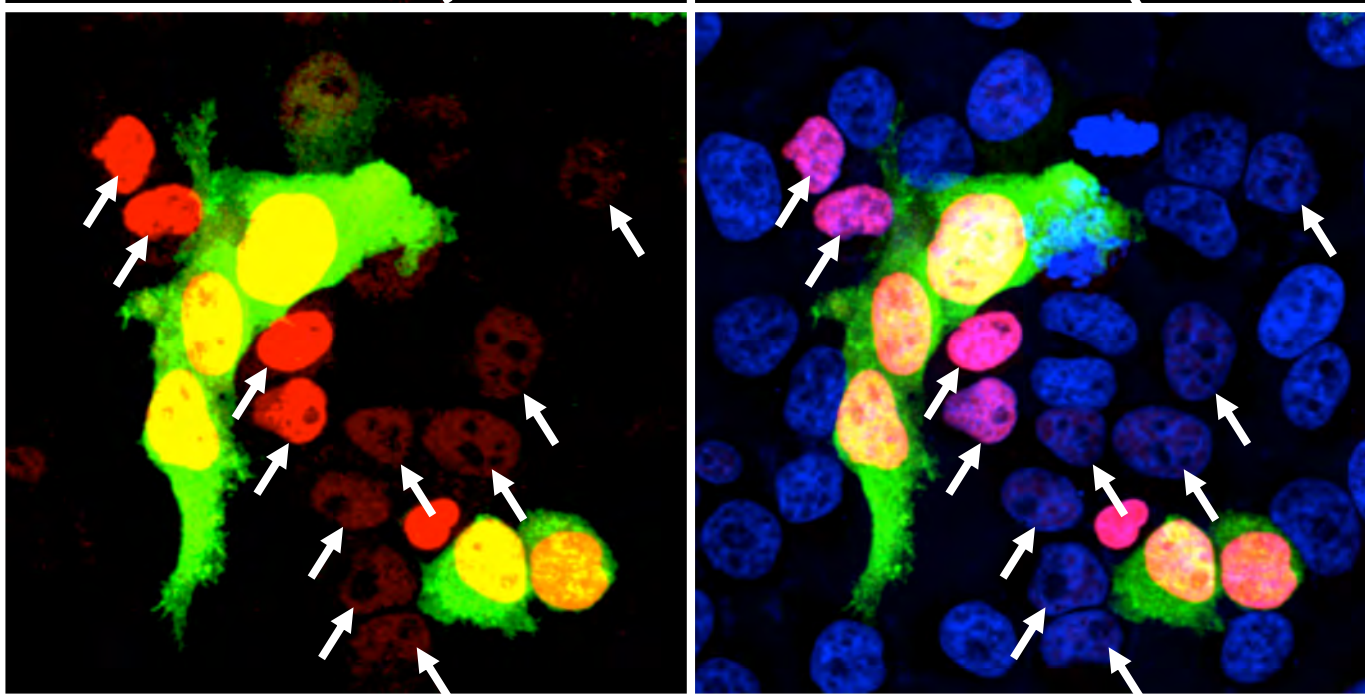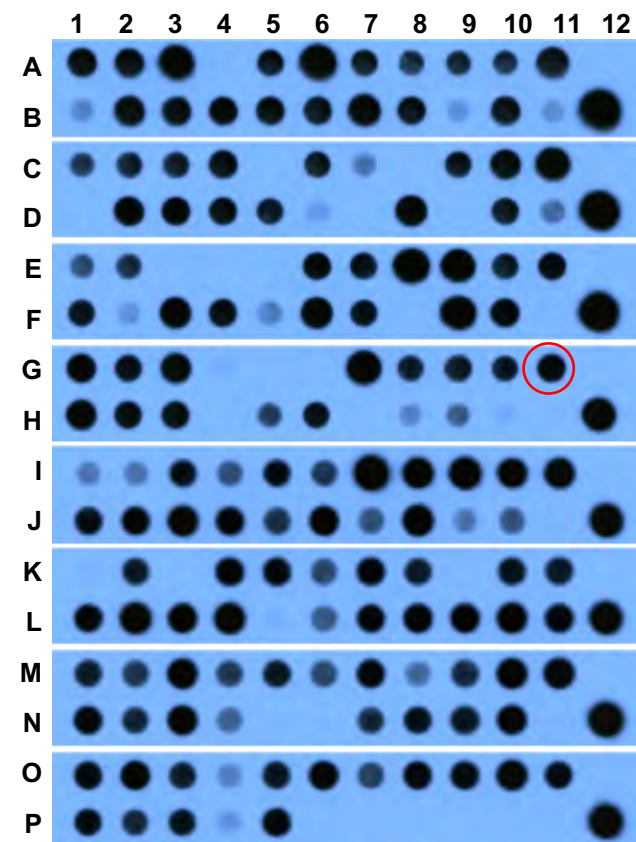

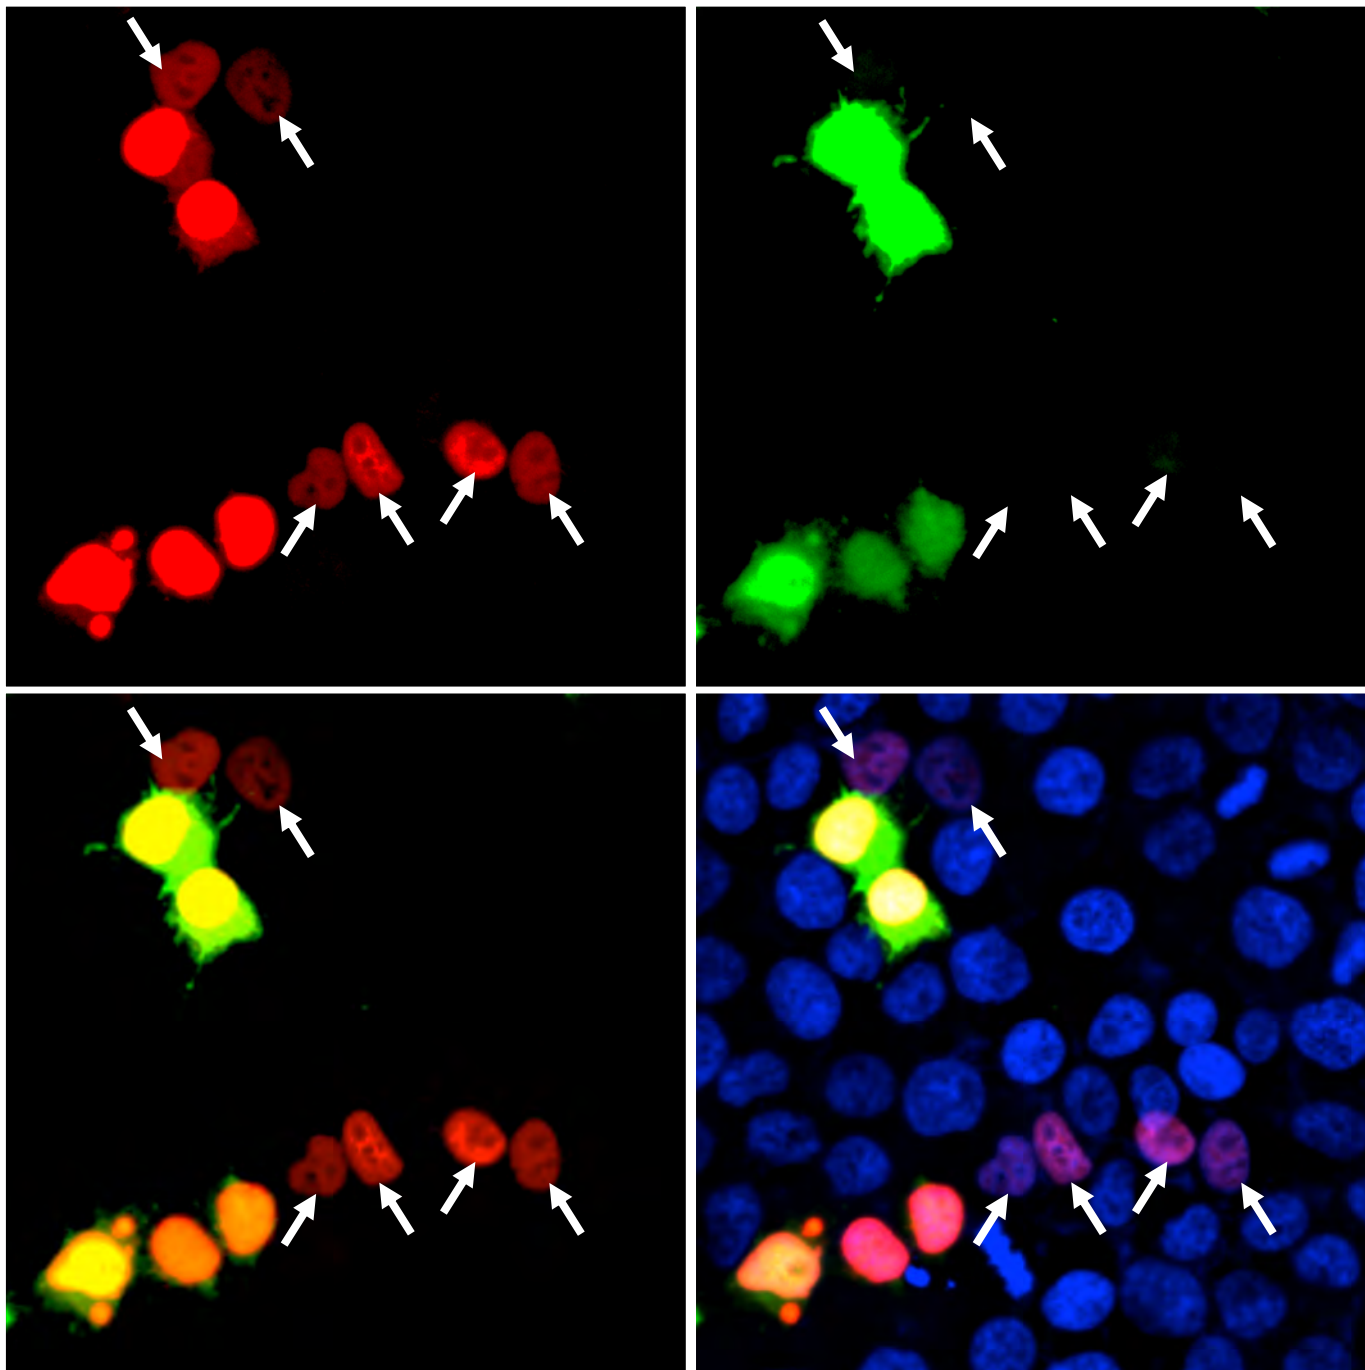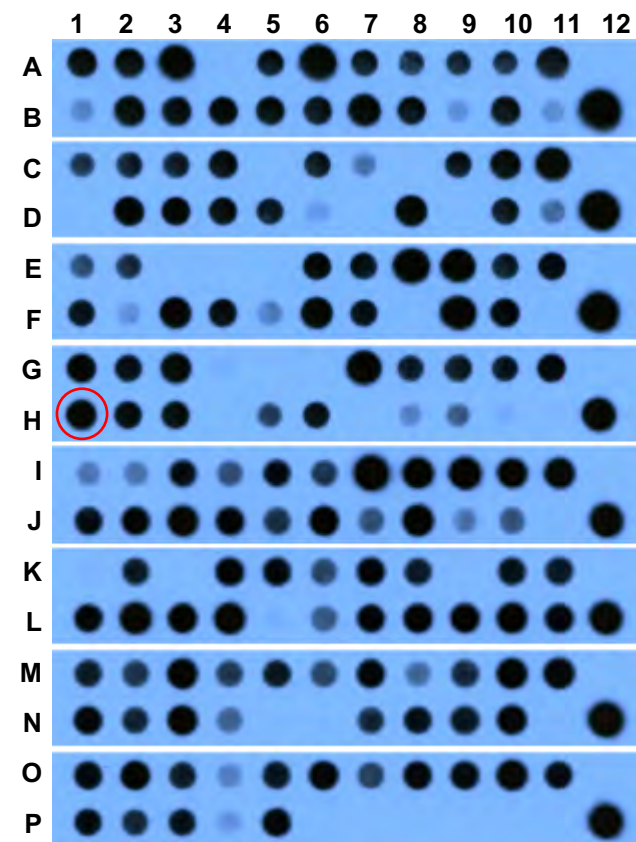













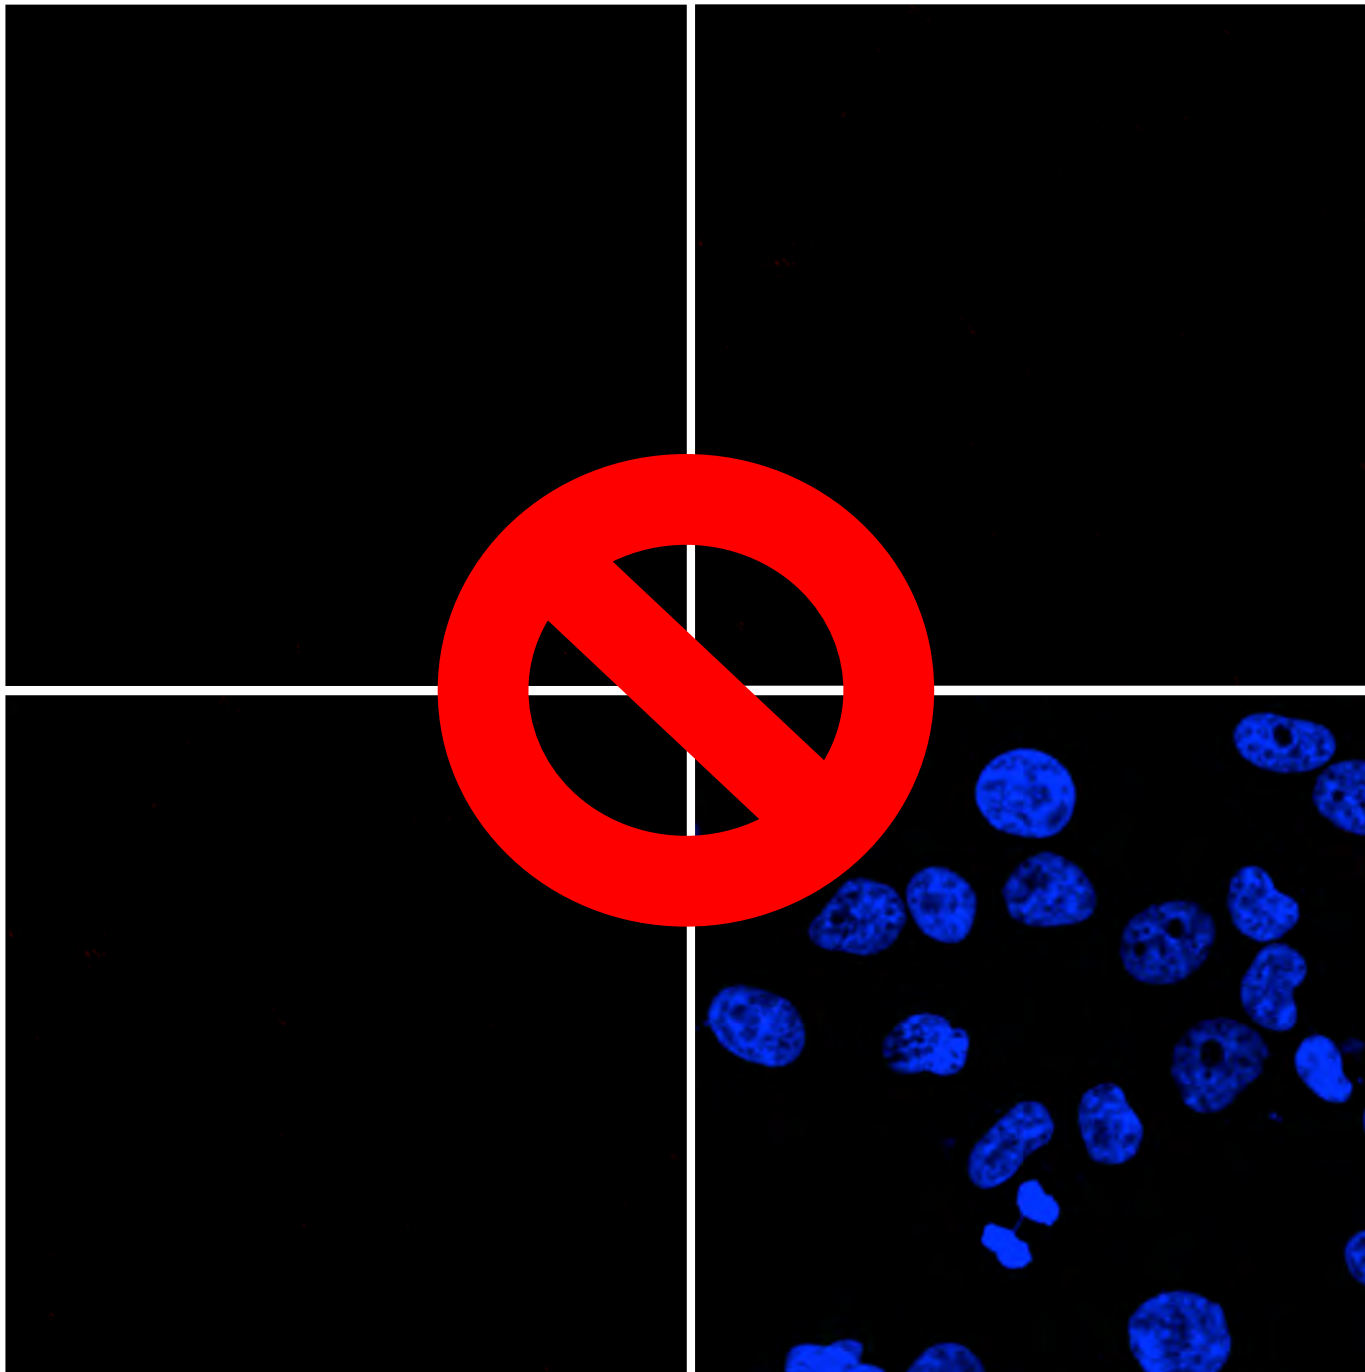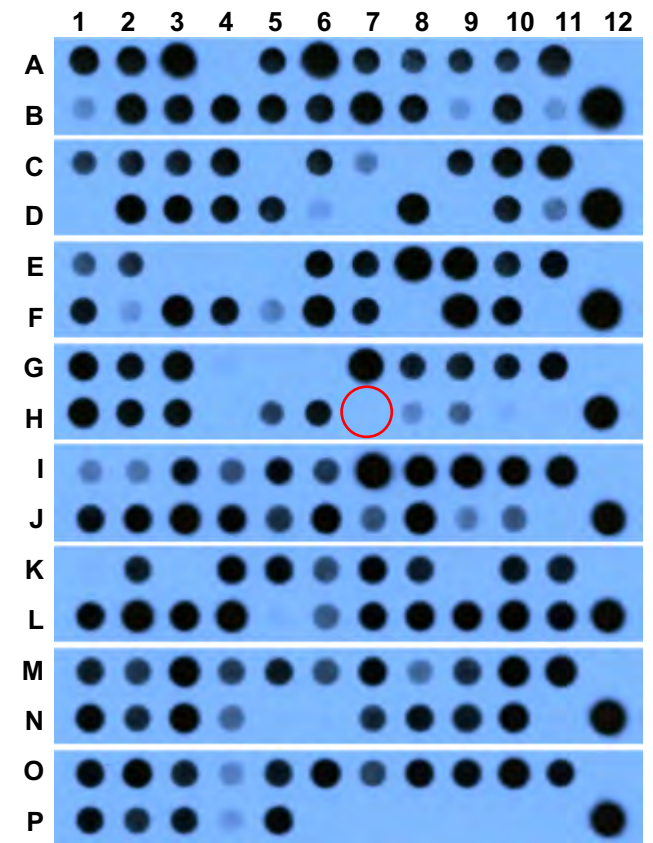



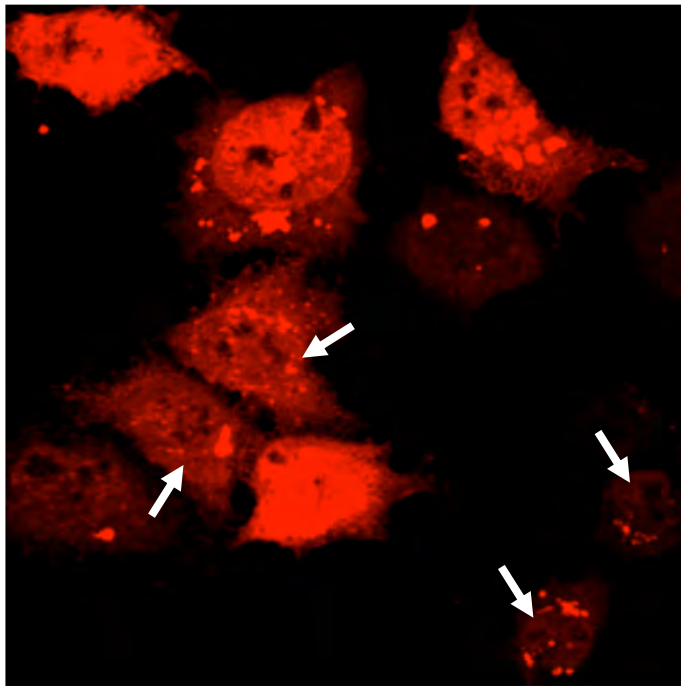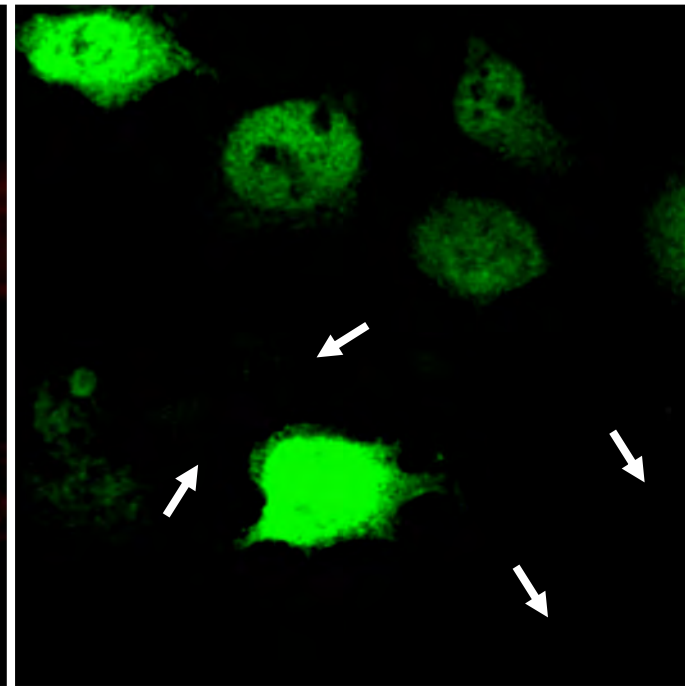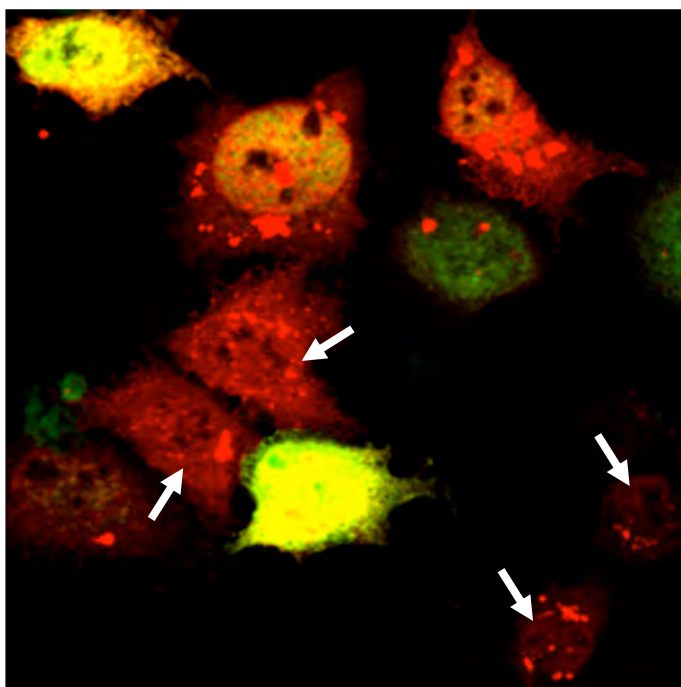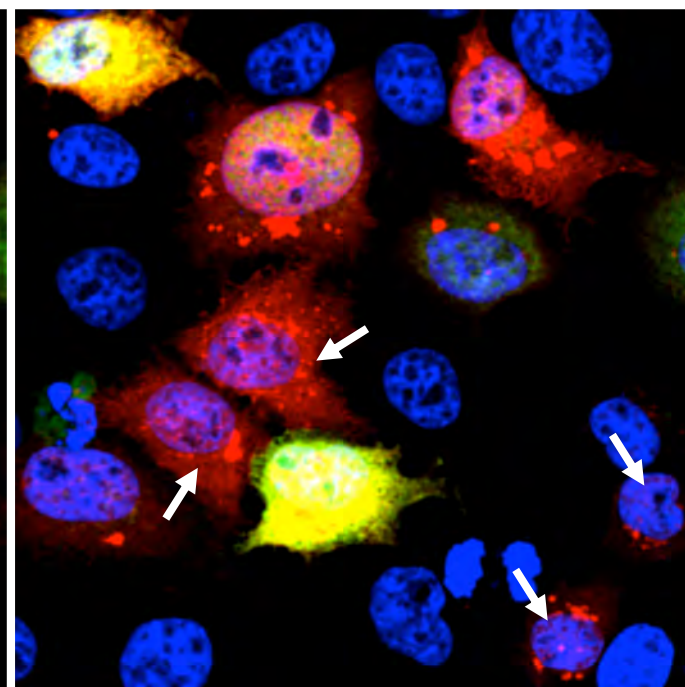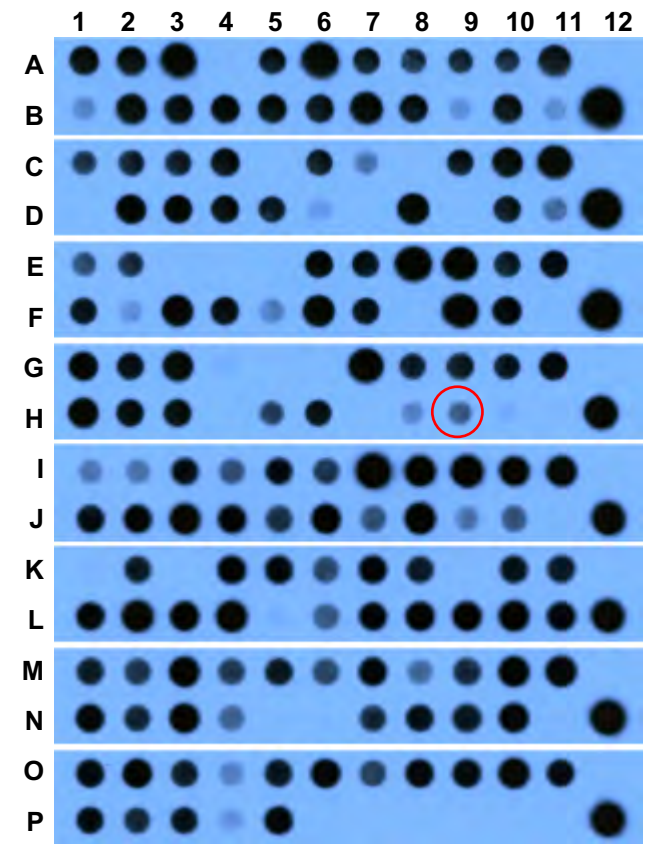



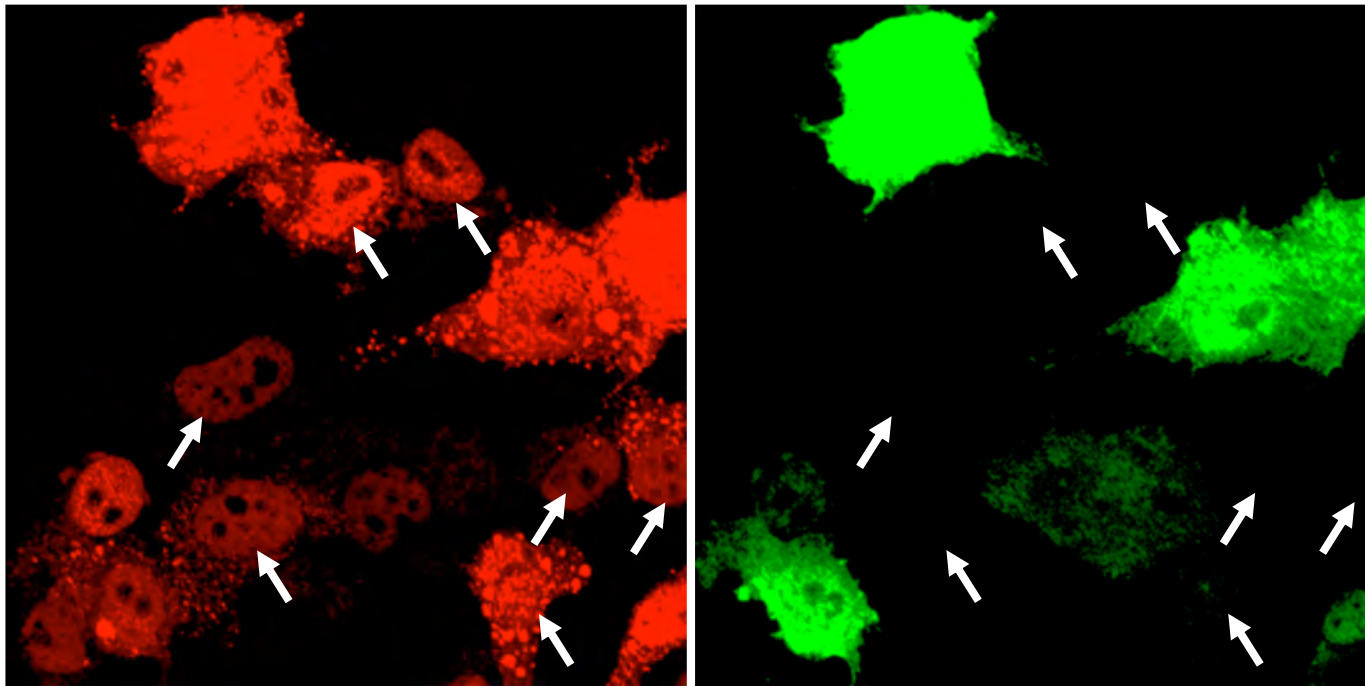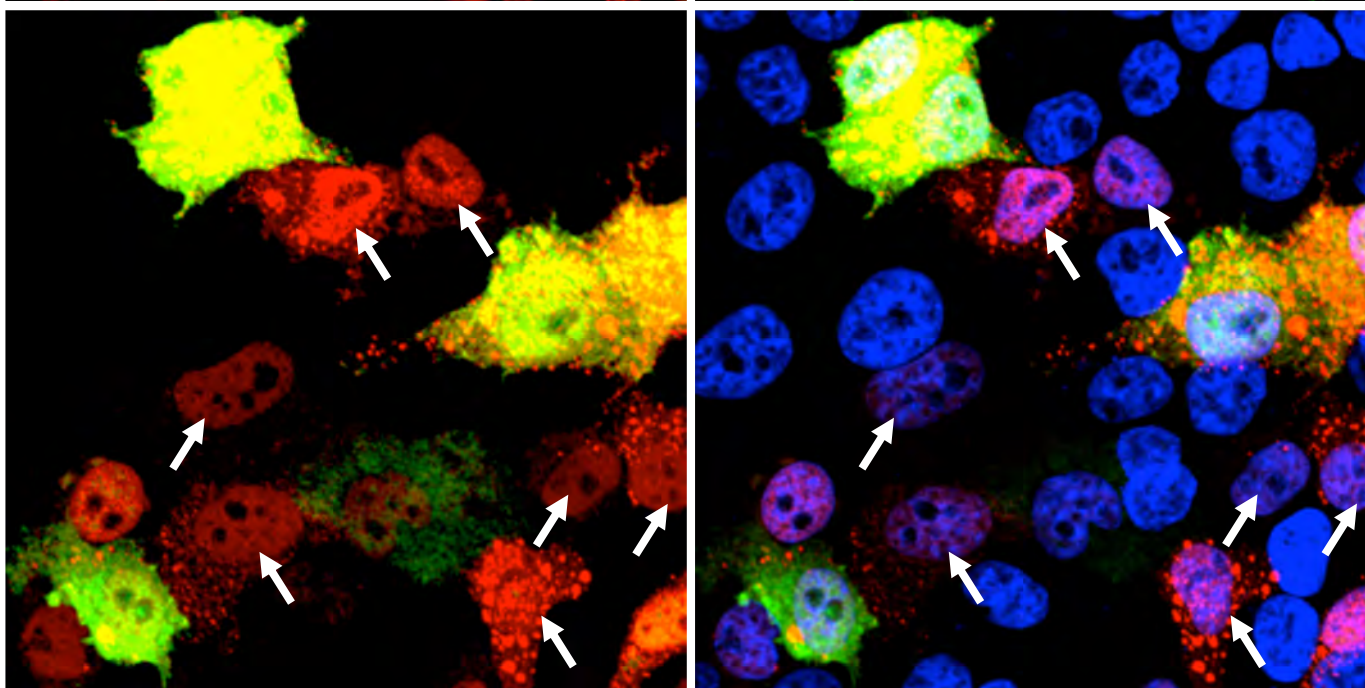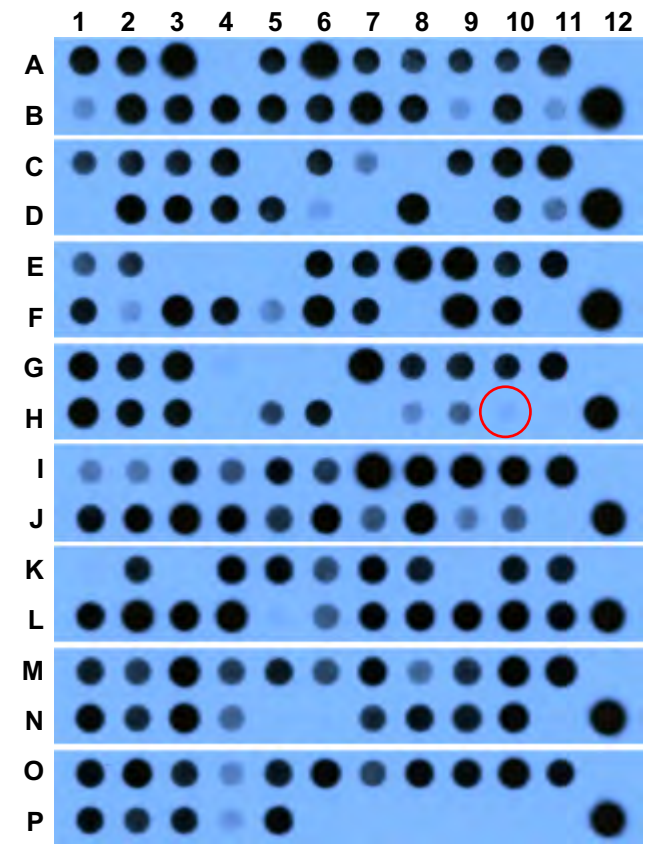







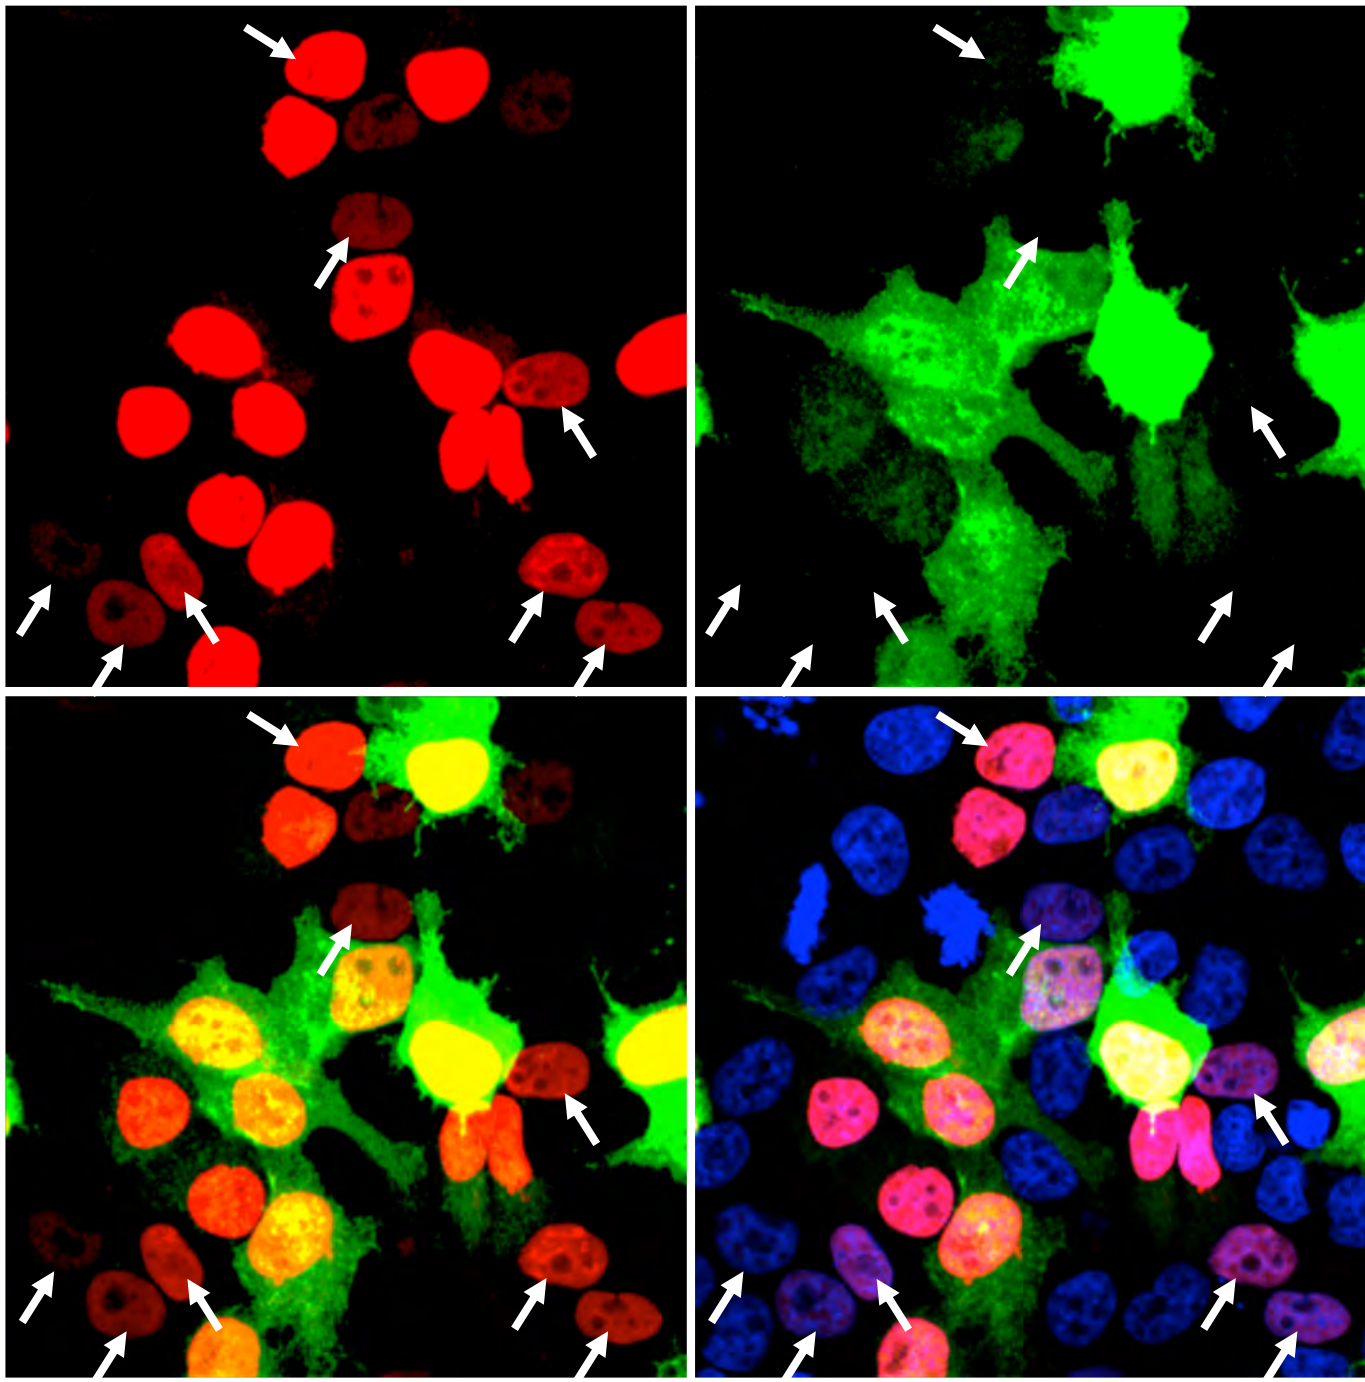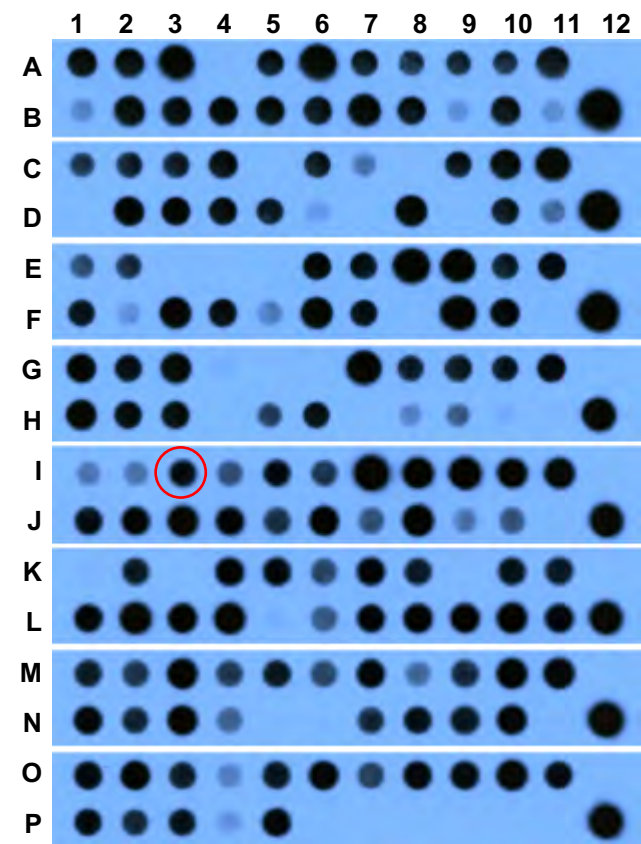































Ej105-ONECUT1 (60xz, zoom1.7)

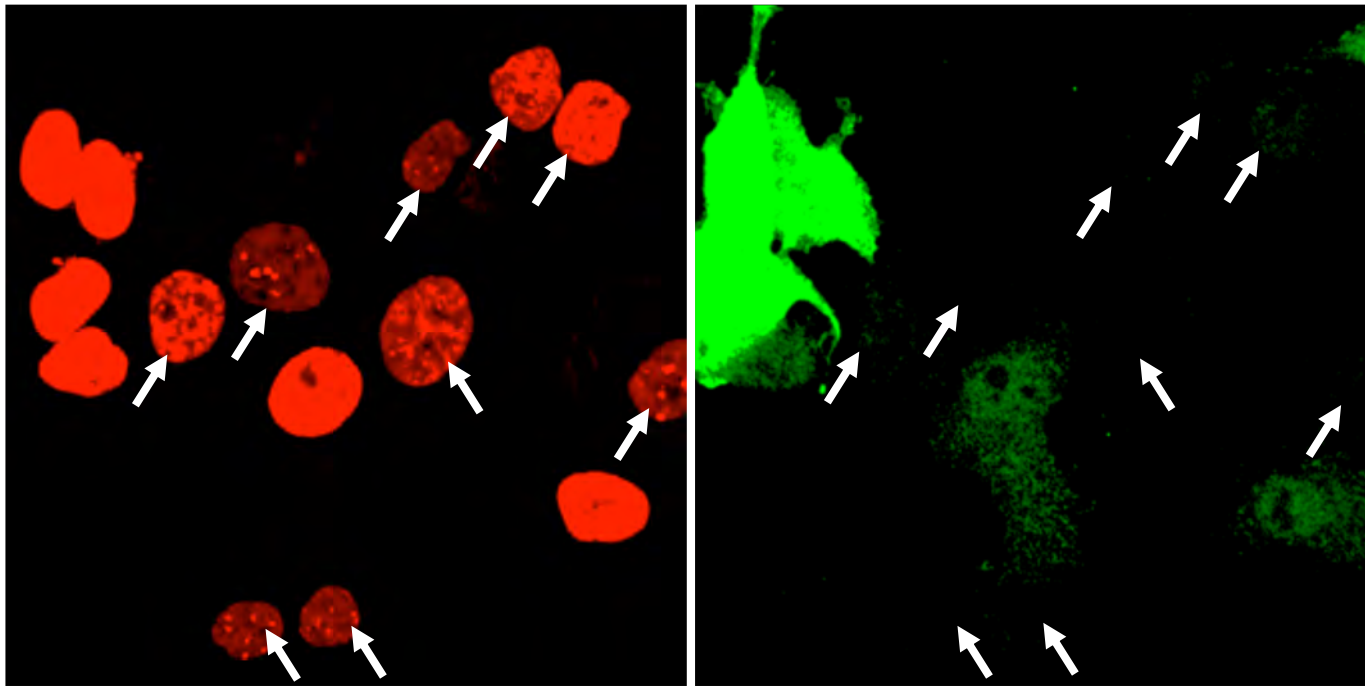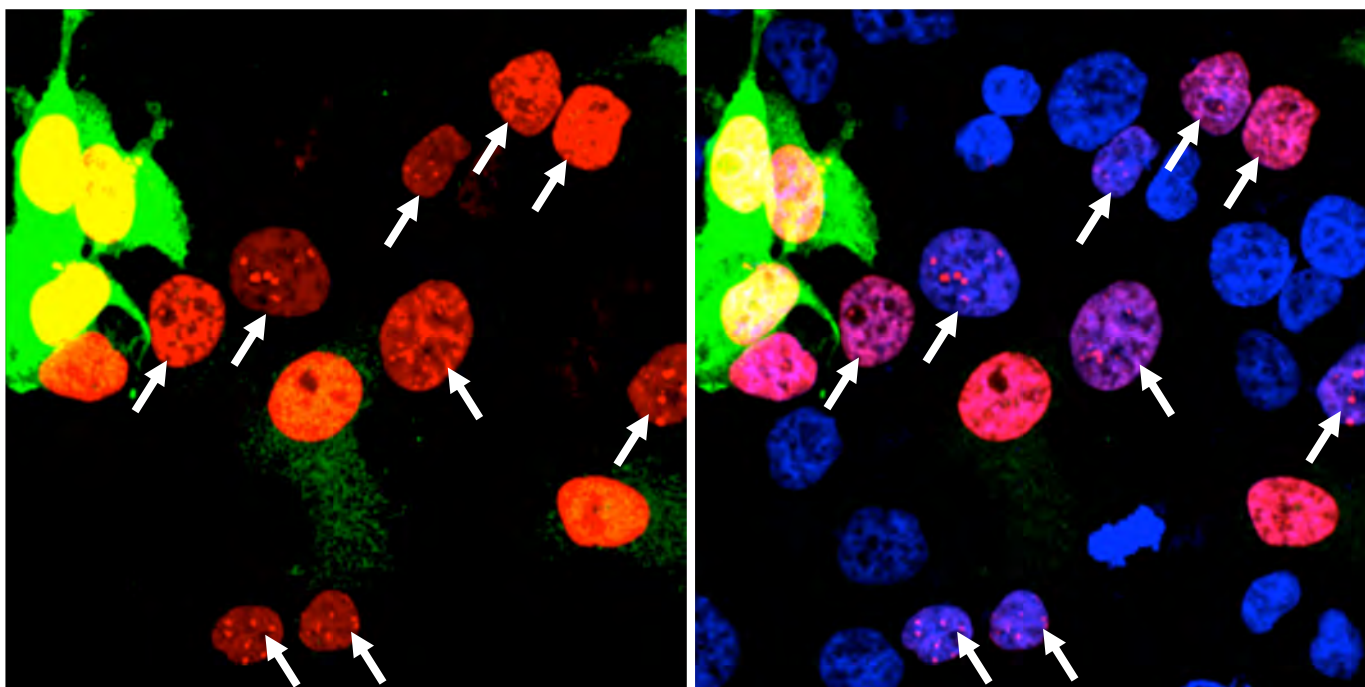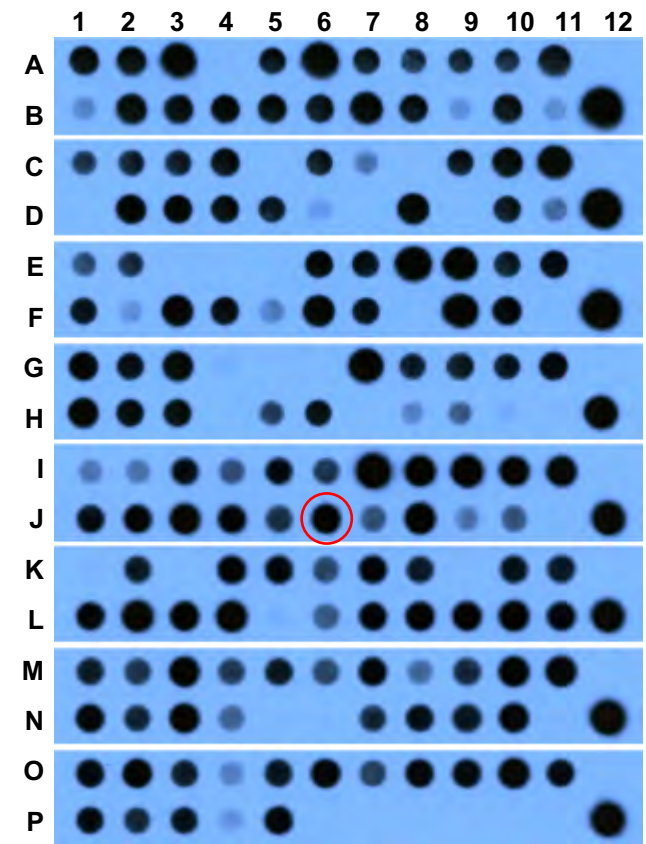







Ej109-OTX2 (60xz, zoom1.7)

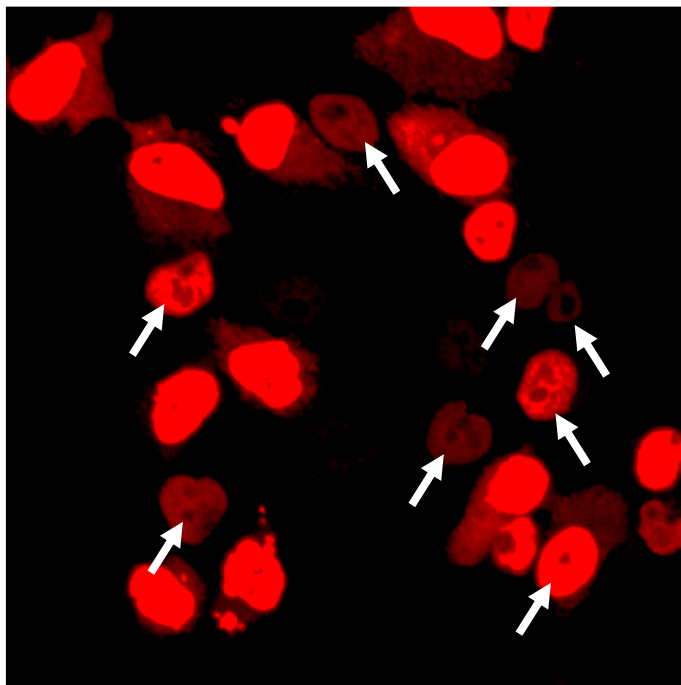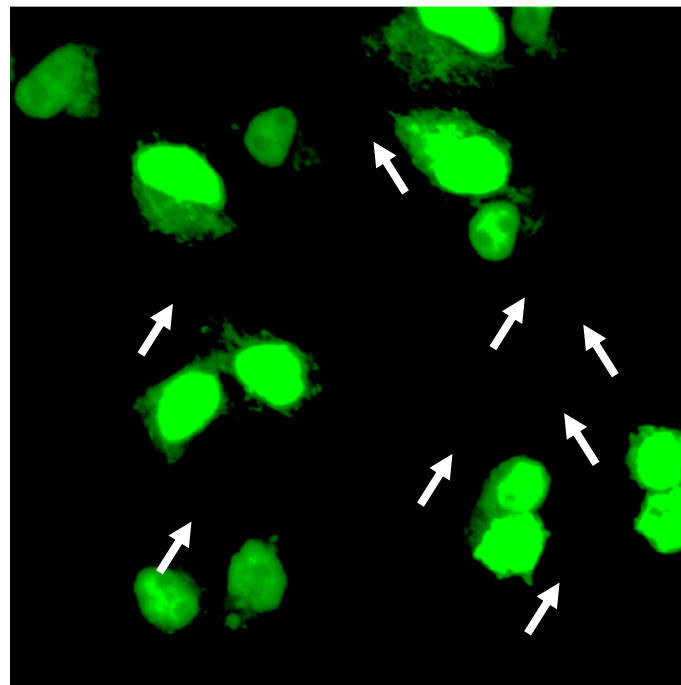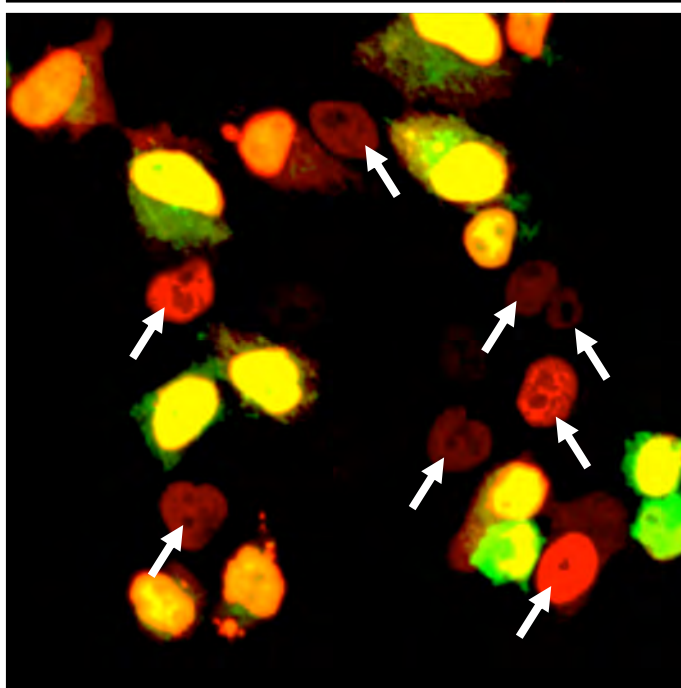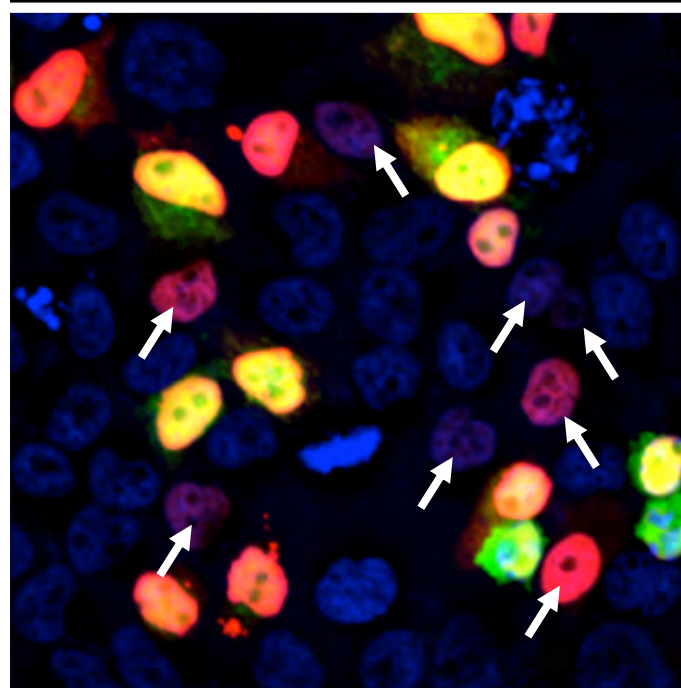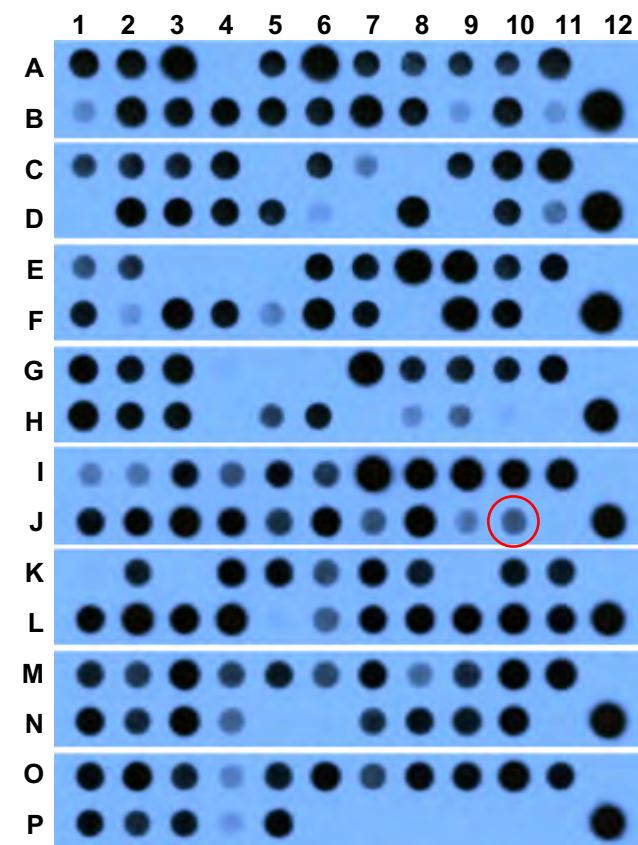









































































































































Ej170-ZHX3 (60xz, zoom1.7)

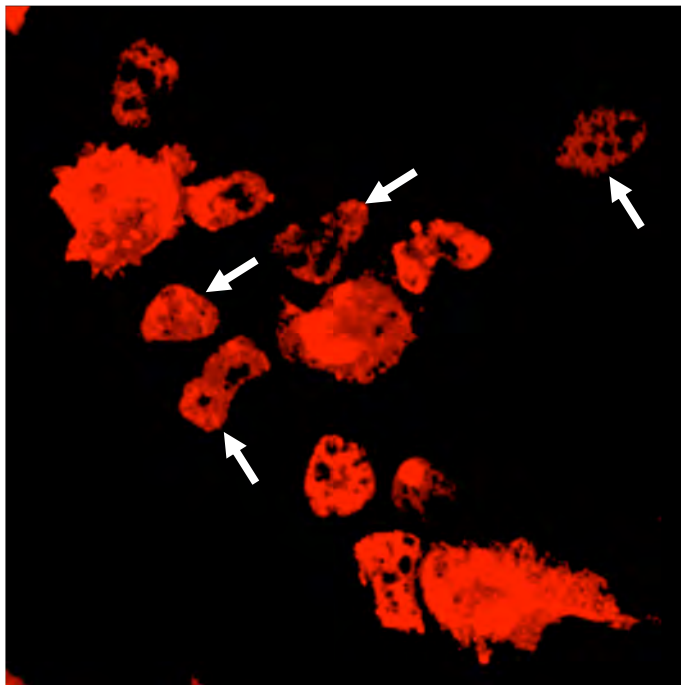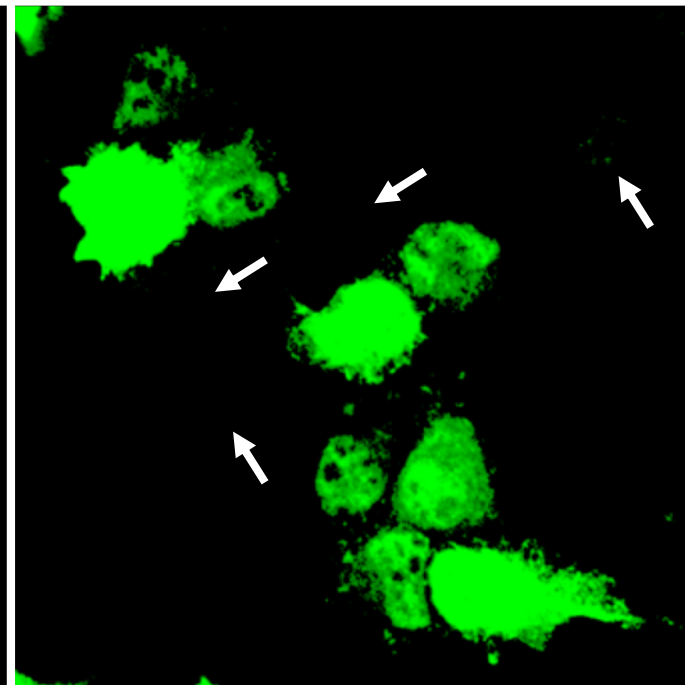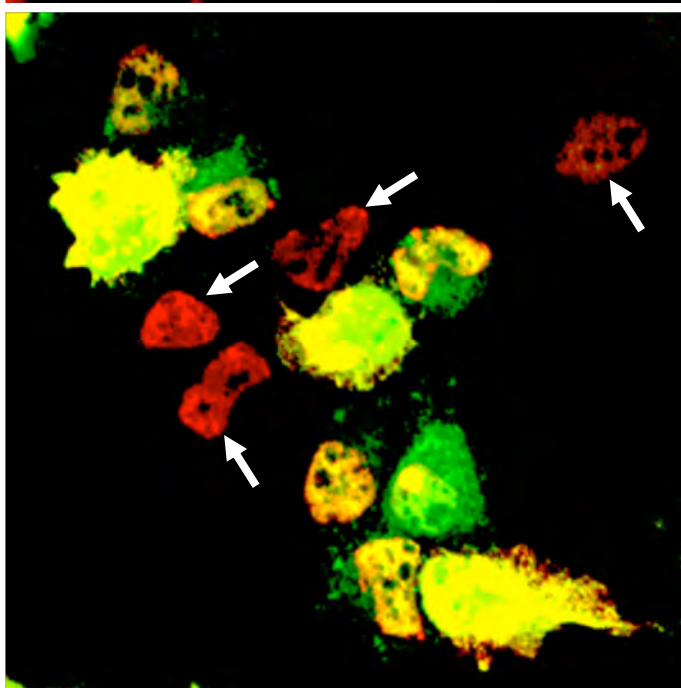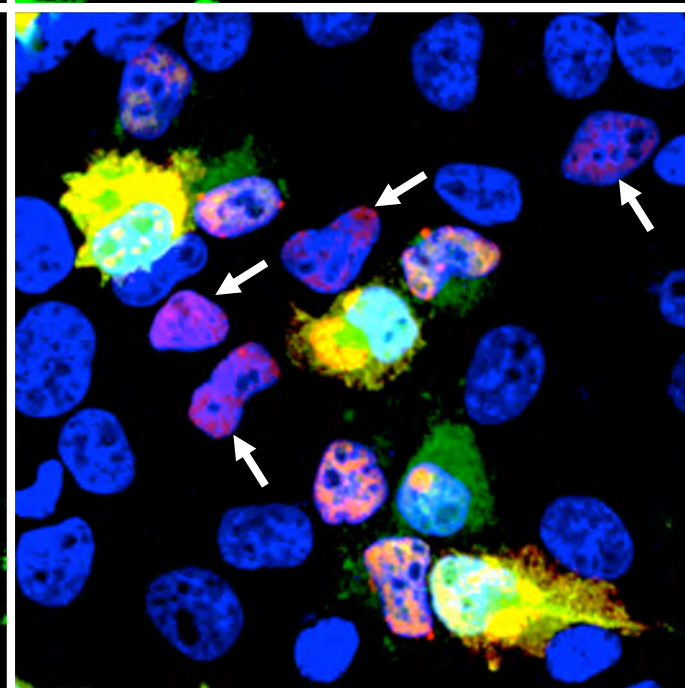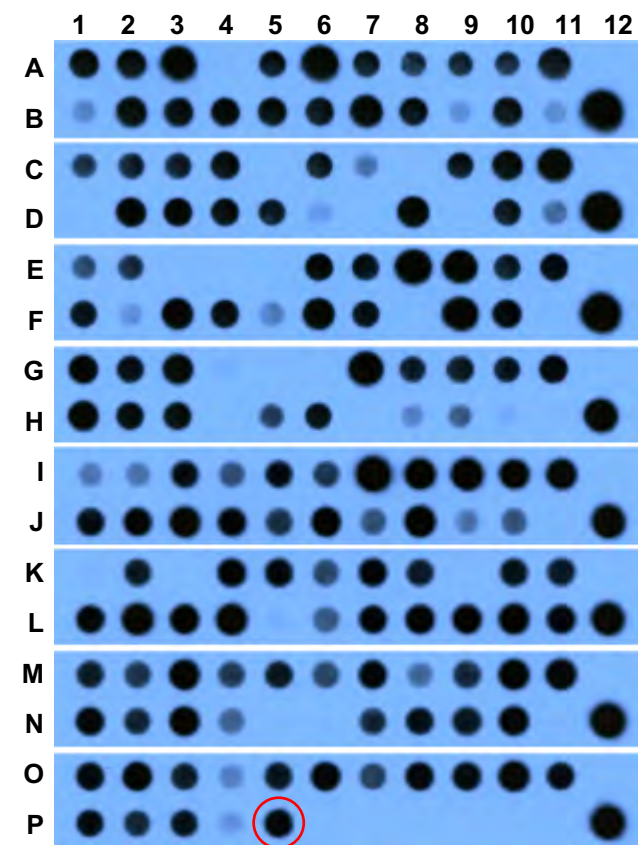

Supplement: NIHMS1832618-supplement-Supplemental_Dataset_2.pdf [file NIHMS1832618-supplement-Supplemental_Dataset_2.pdf]
