# Supplementary material for: Global Analysis of Intercellular Homeodomain Protein Transfer
Source: PubMed Central journal article supplement — Cell Rep. Author manuscript; Available in PMC 2022 Sep 14. (PMC9472292; doi:10.1016/j.celrep.2019.06.056), 2019-07-16

***Lee et al.\_Supplementary Dataset 3***

*In utero* electroporation images for Figure 3

**Whole brain  
section image**

**V5**

**EGFP**

**V5/EGFP**

**Merge**

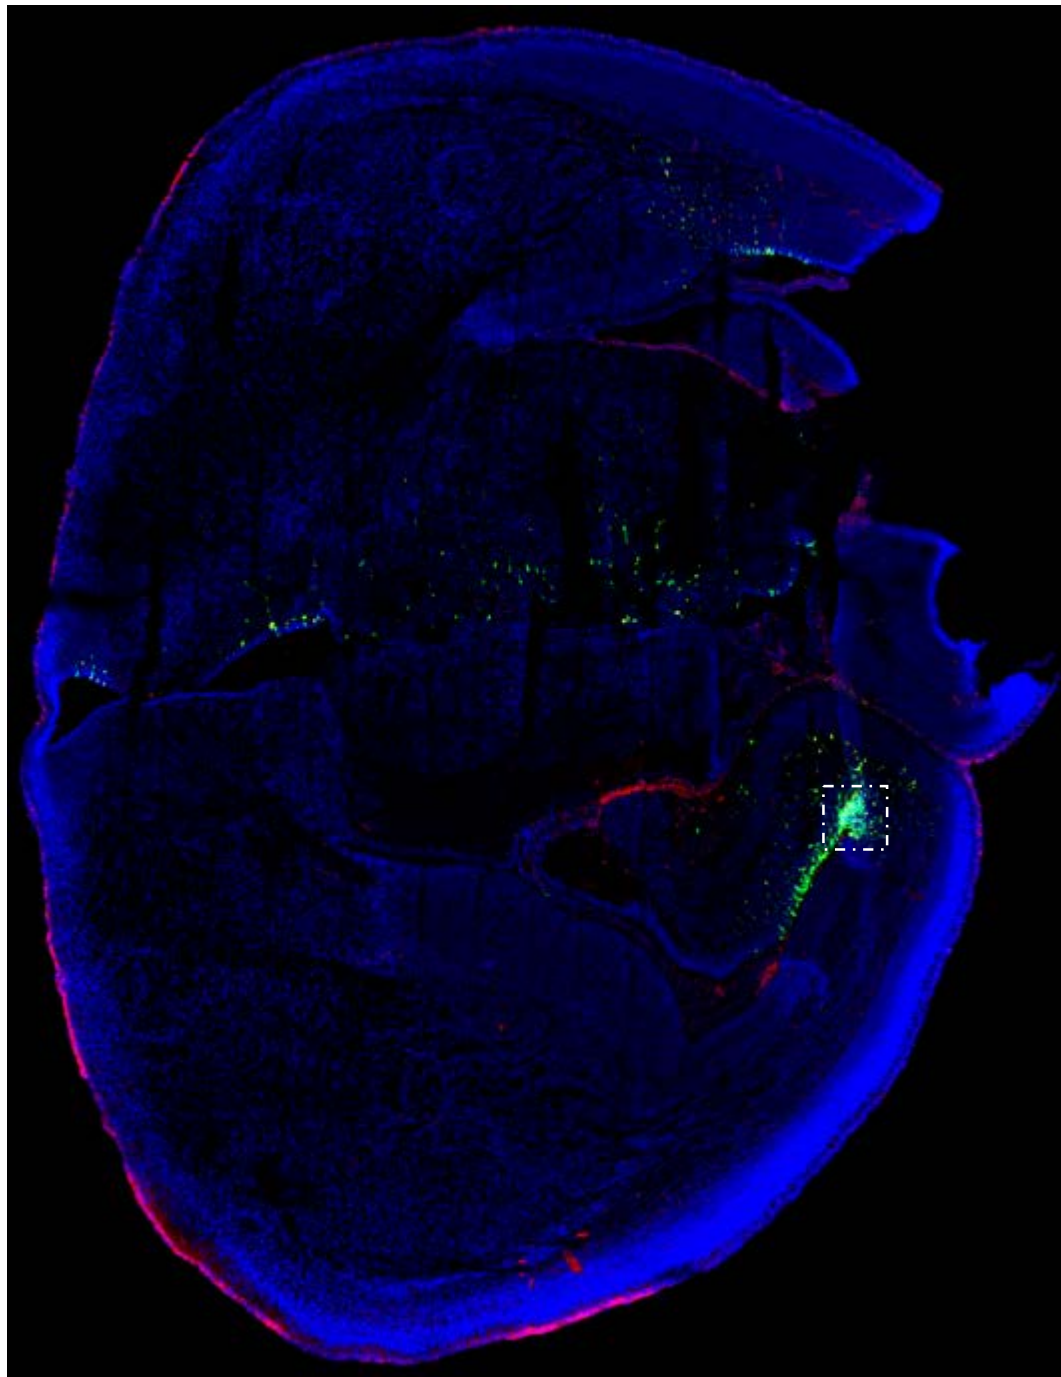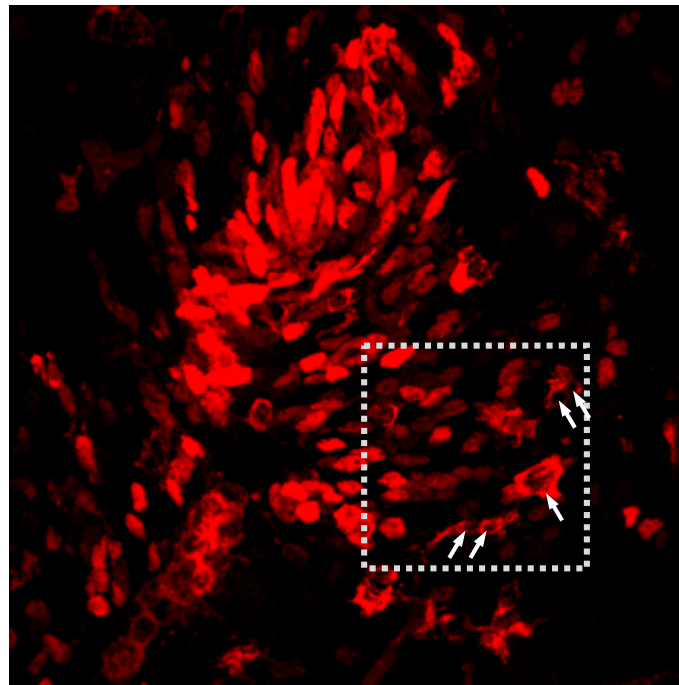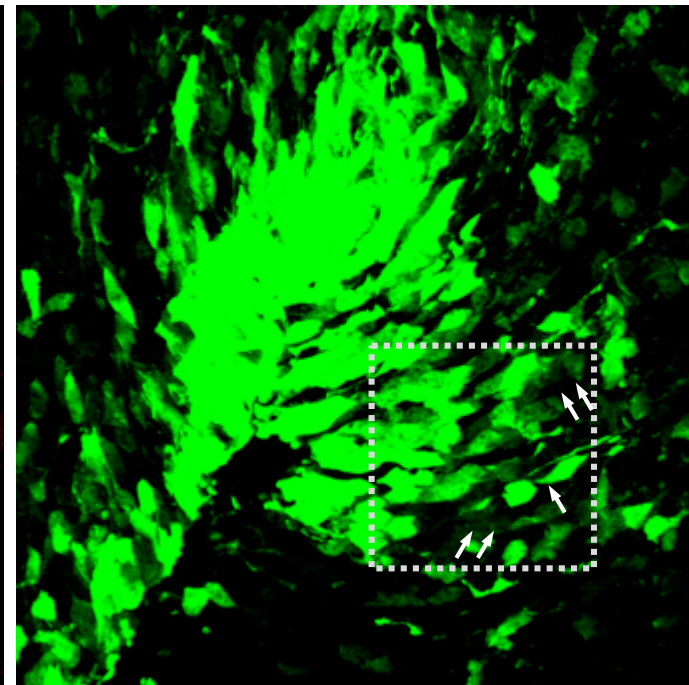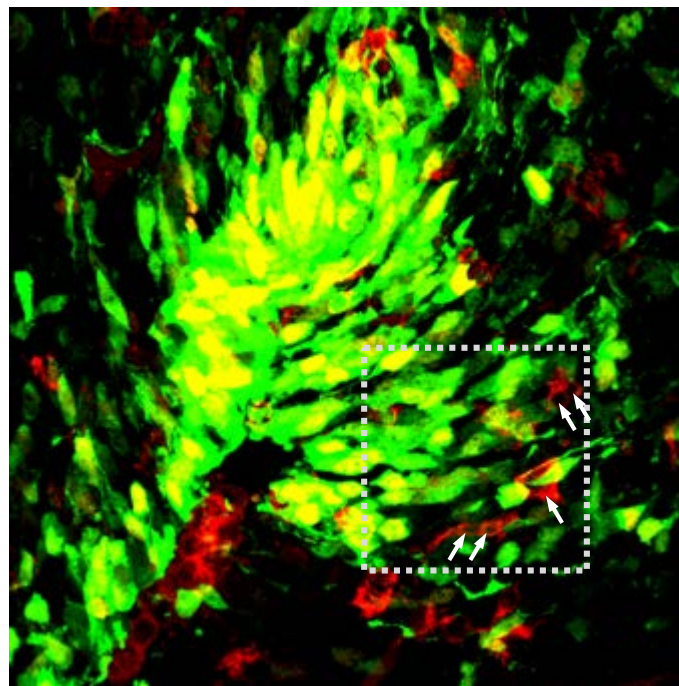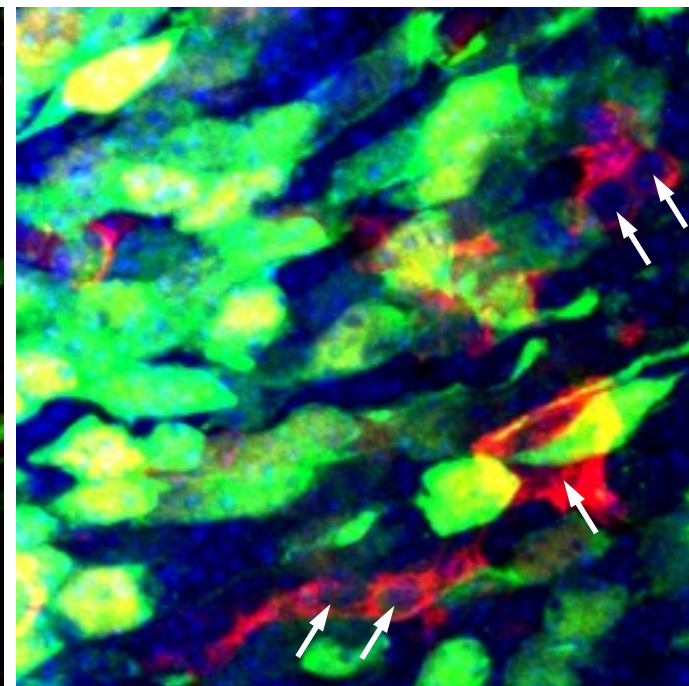

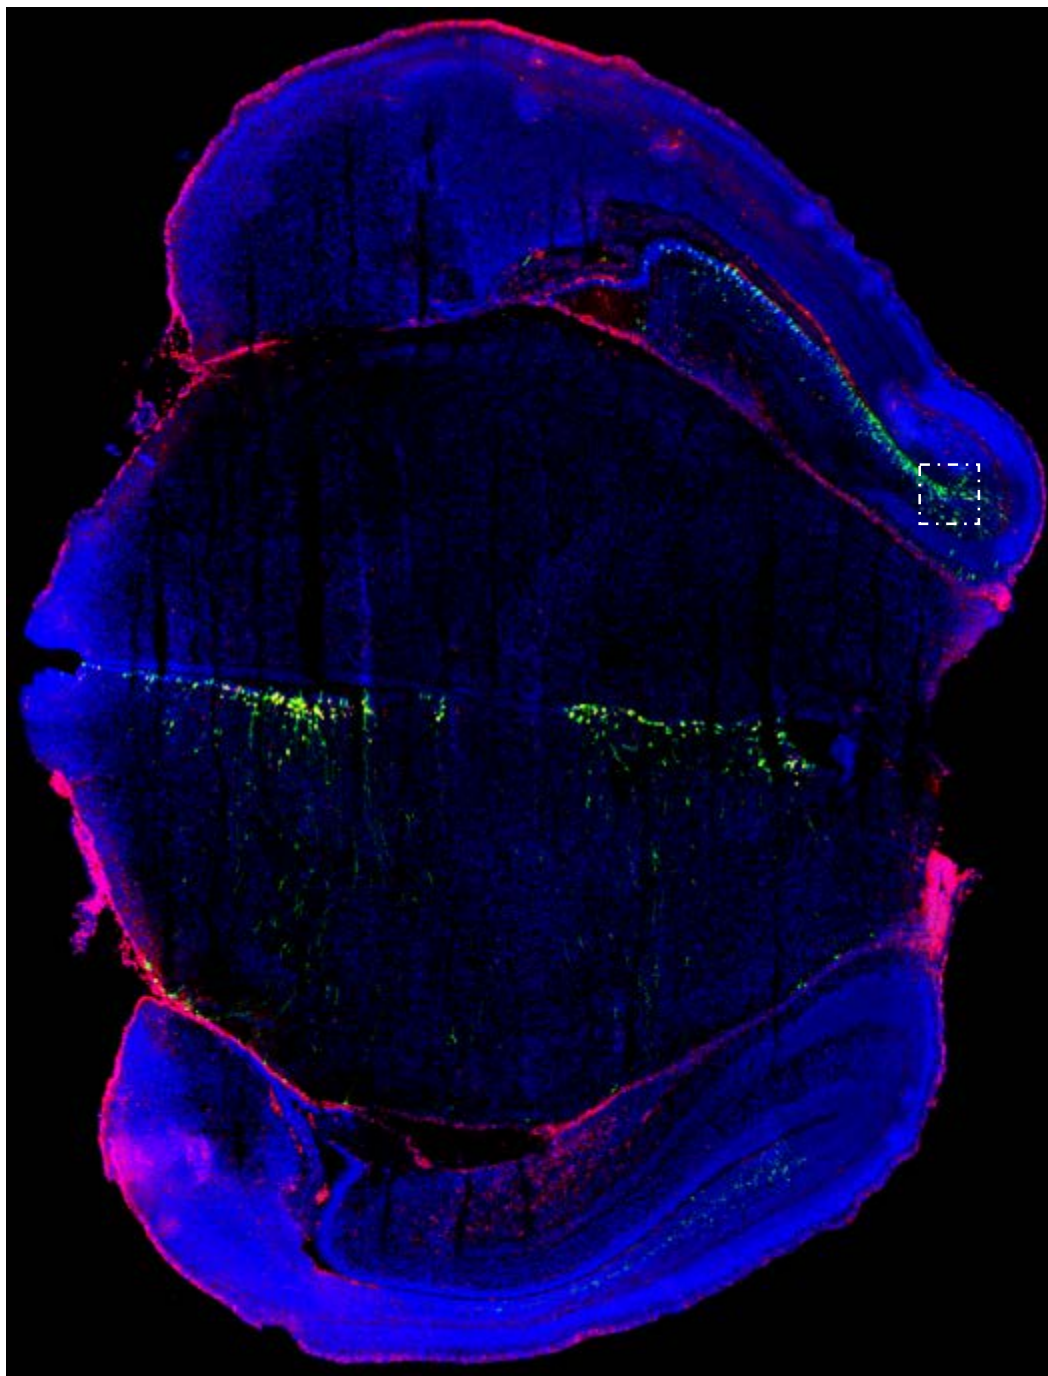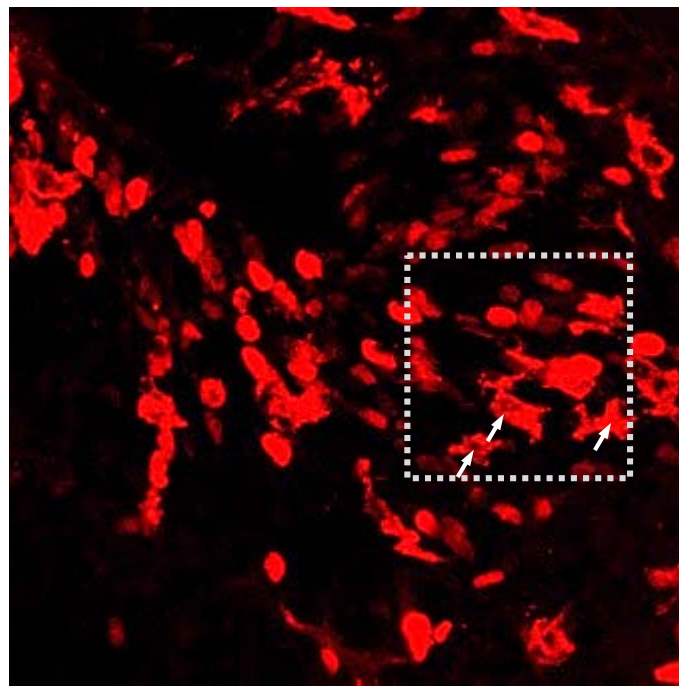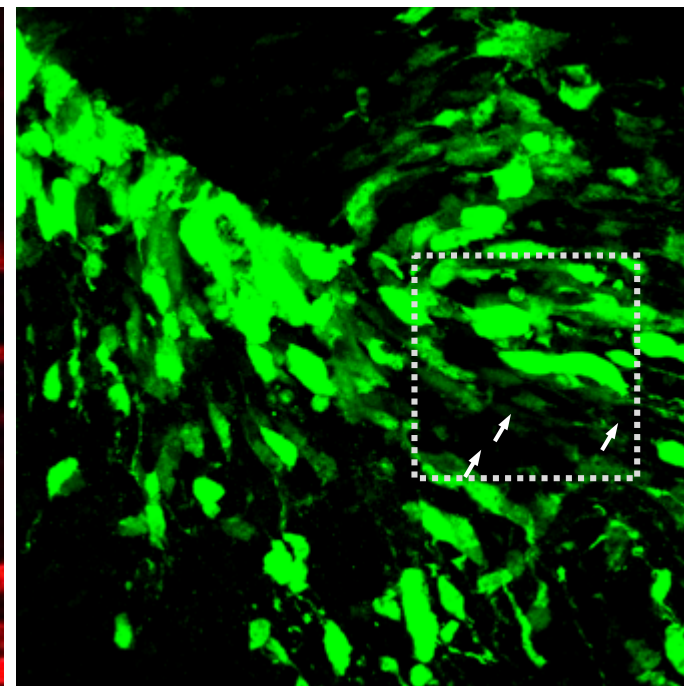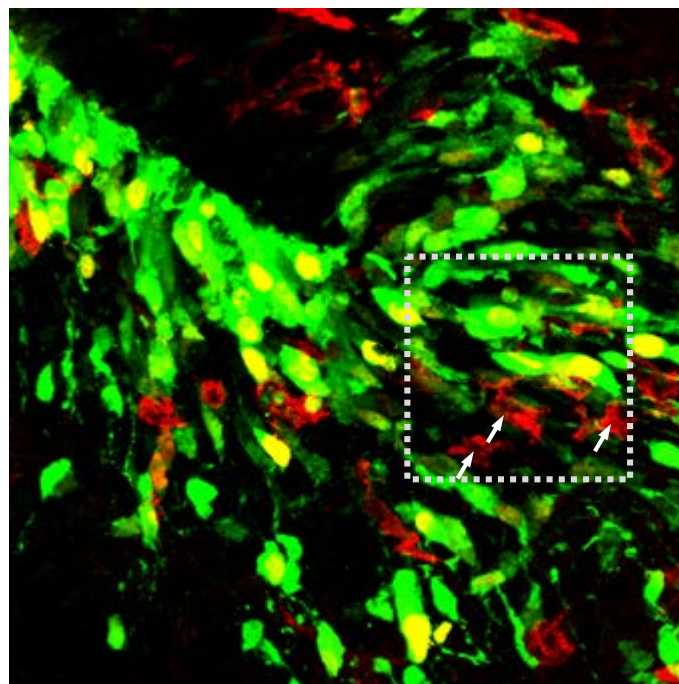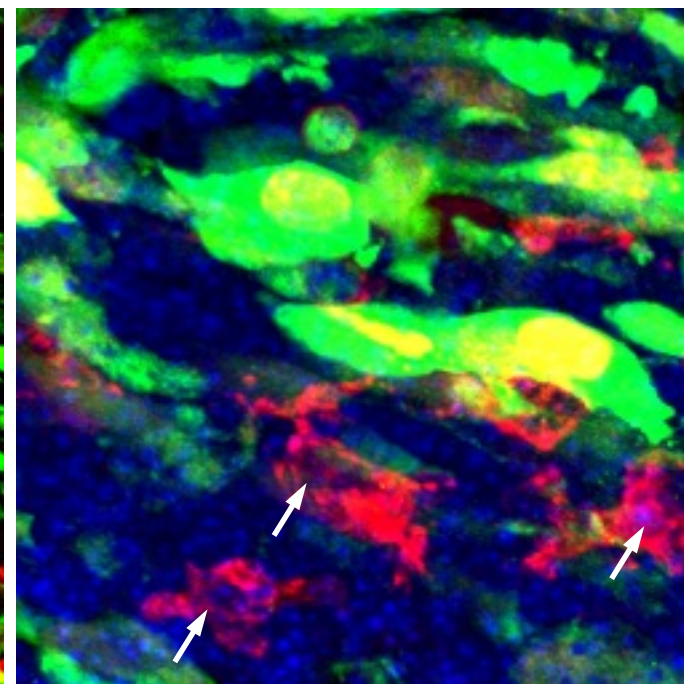

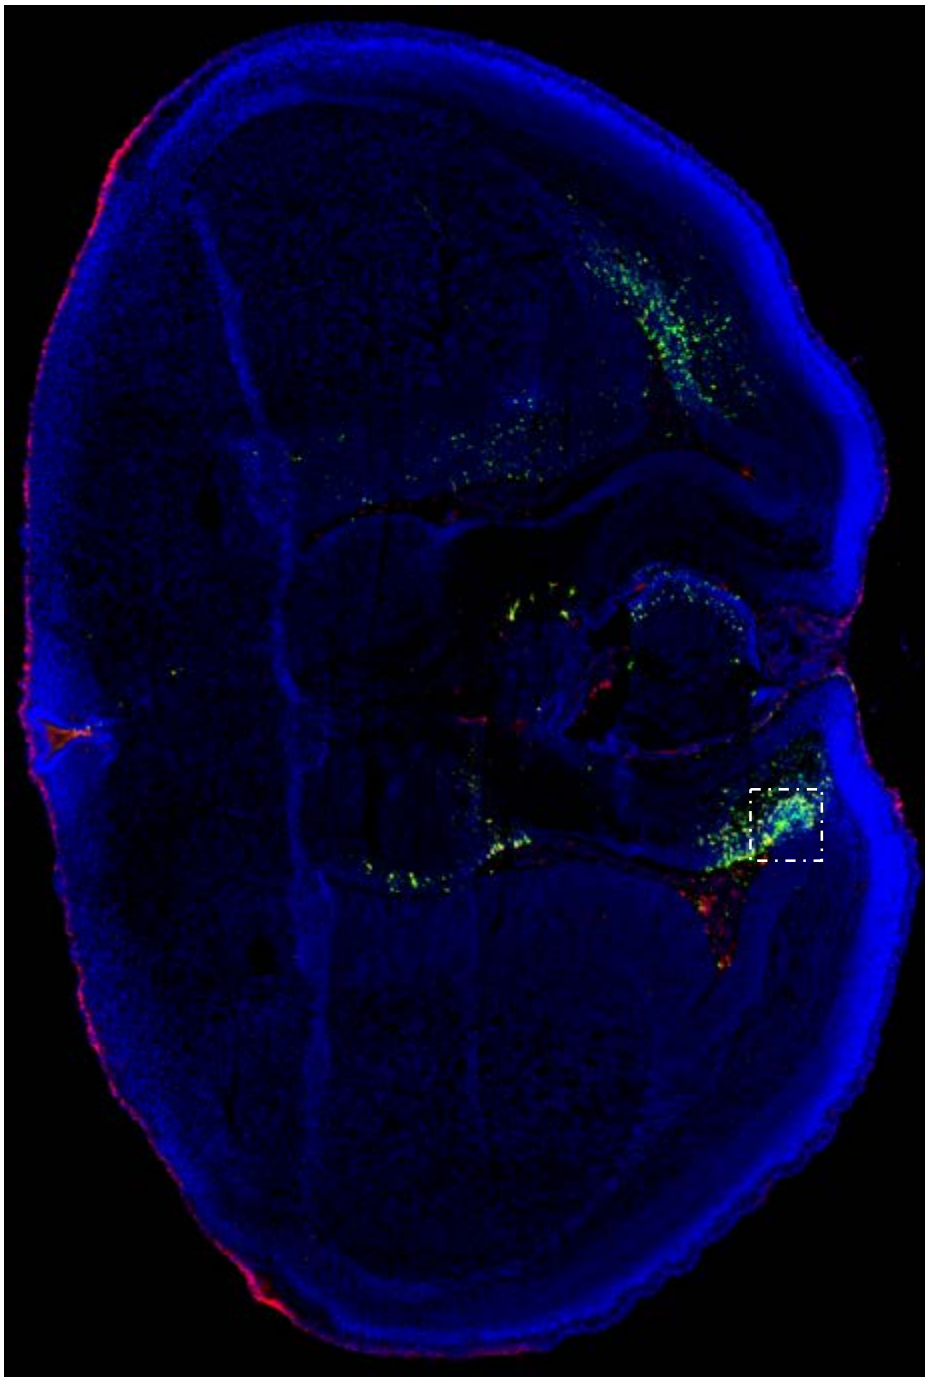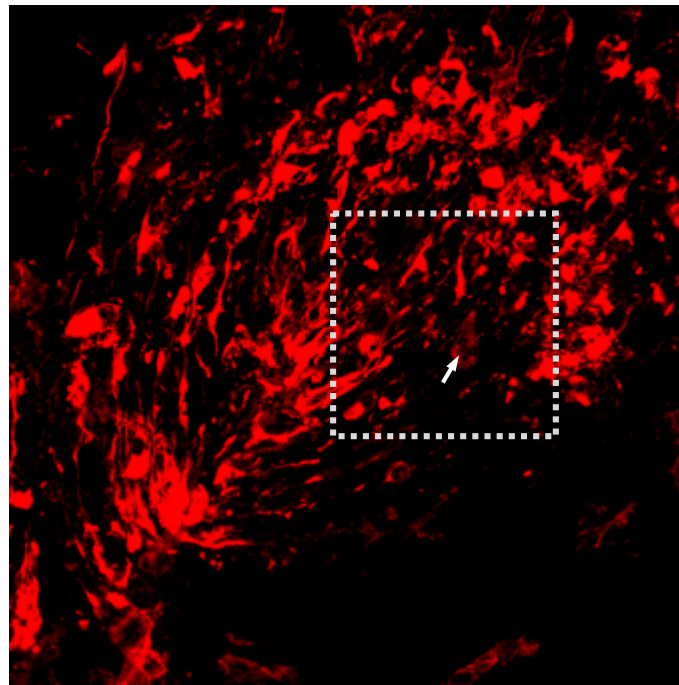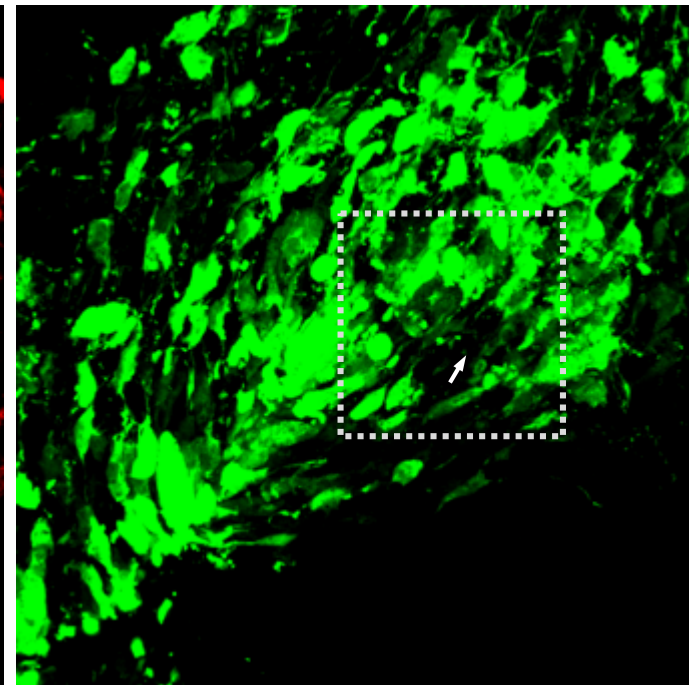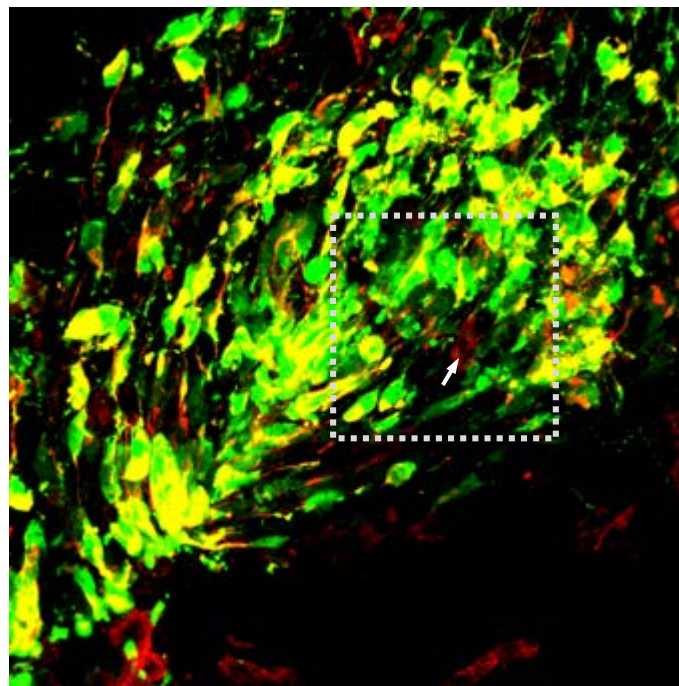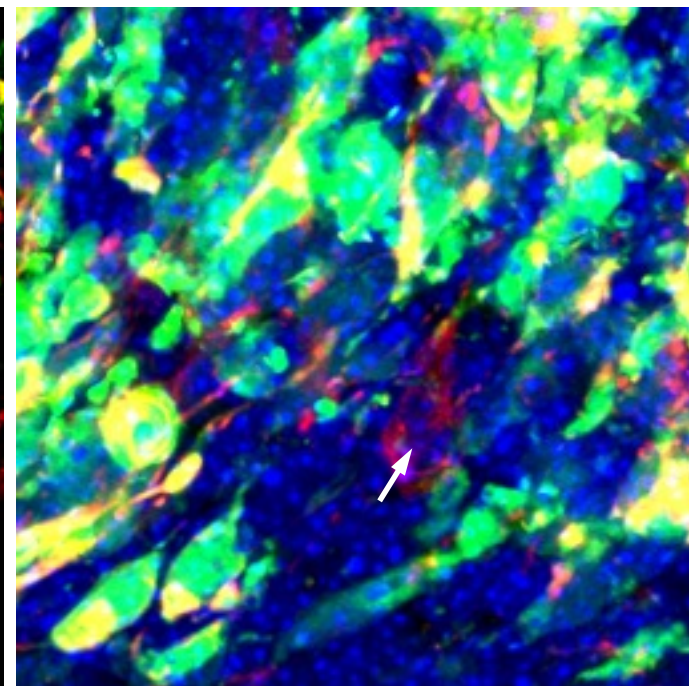

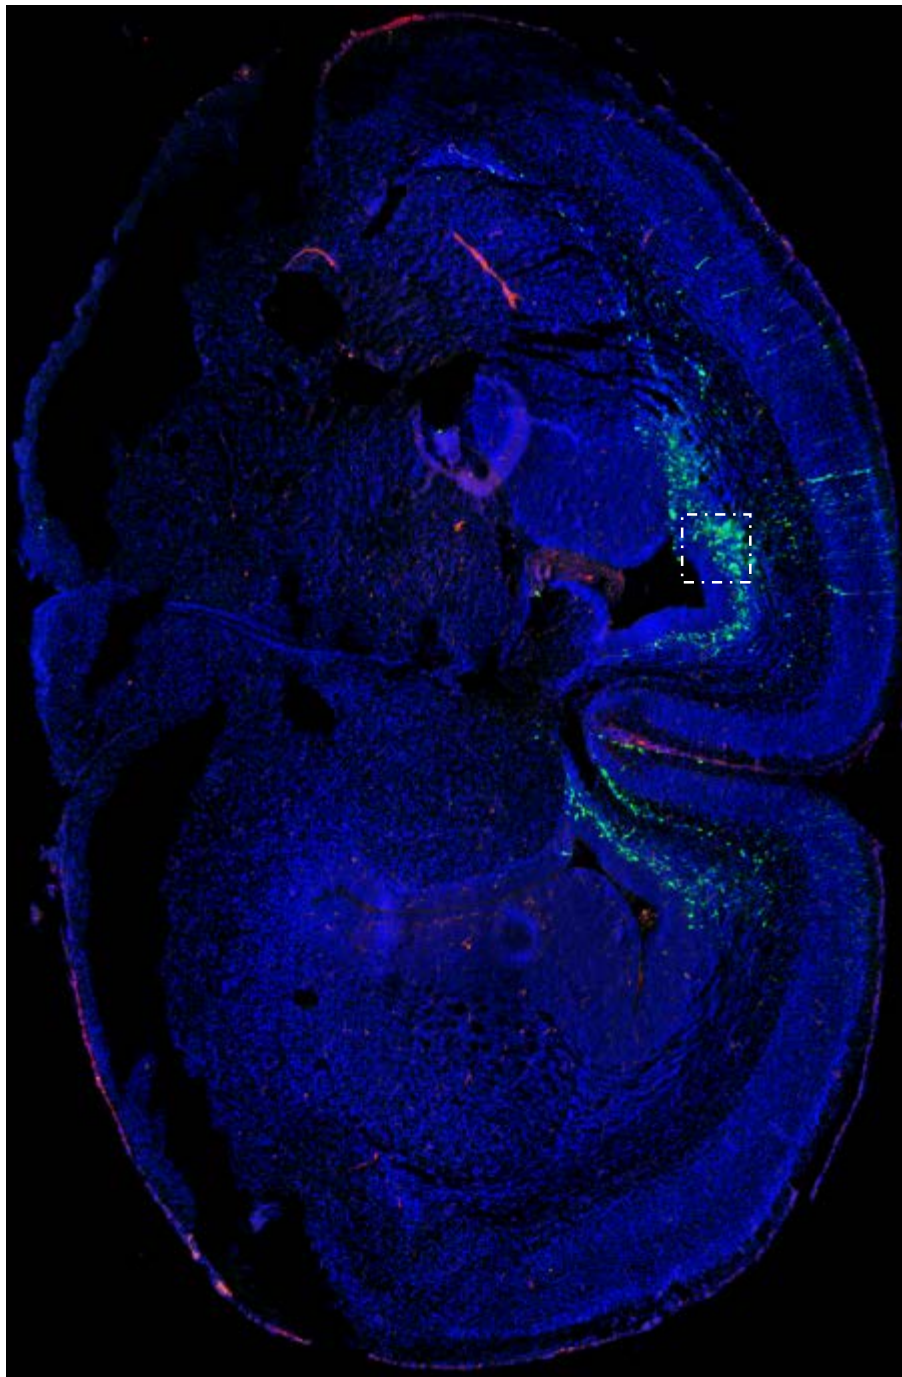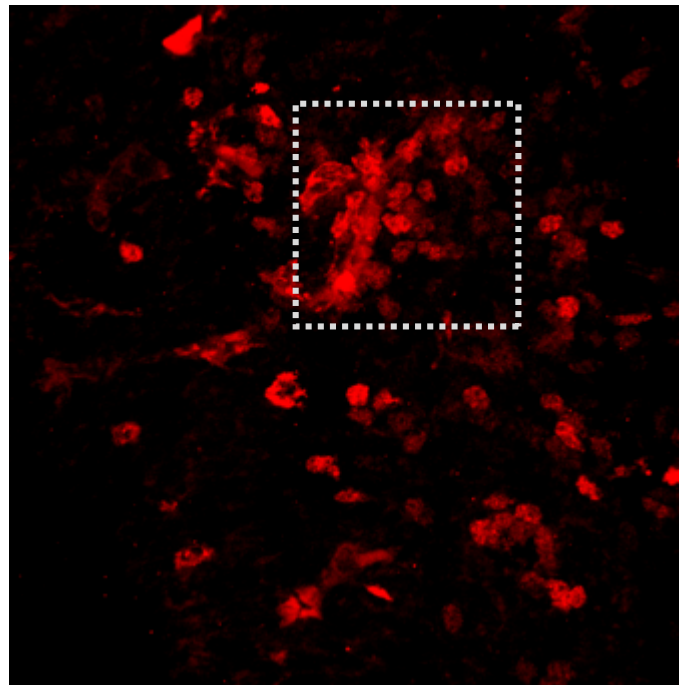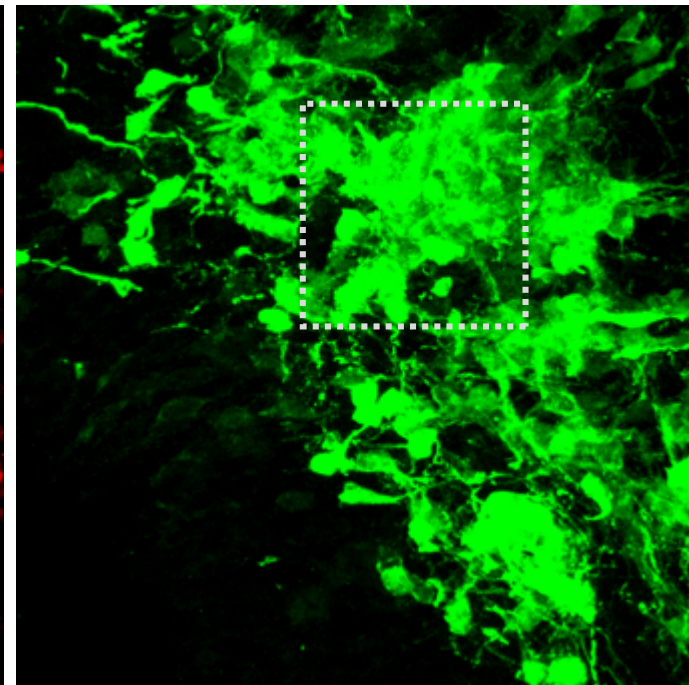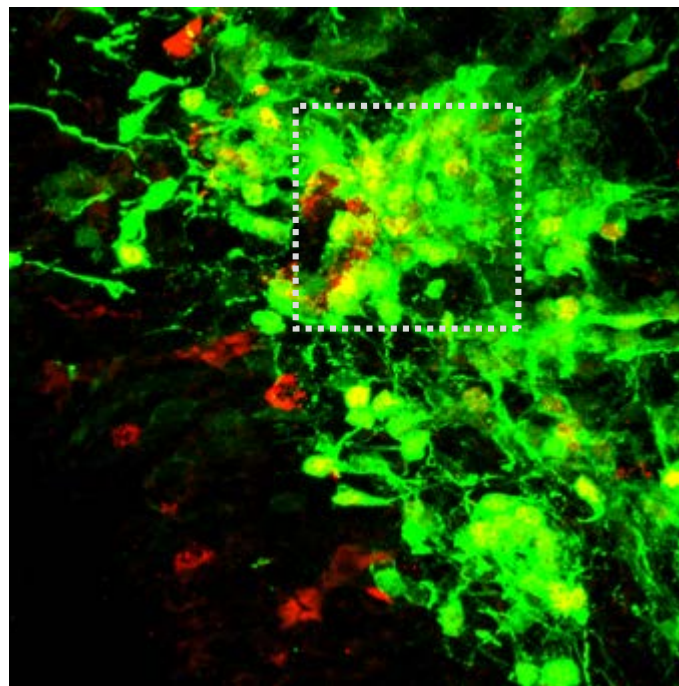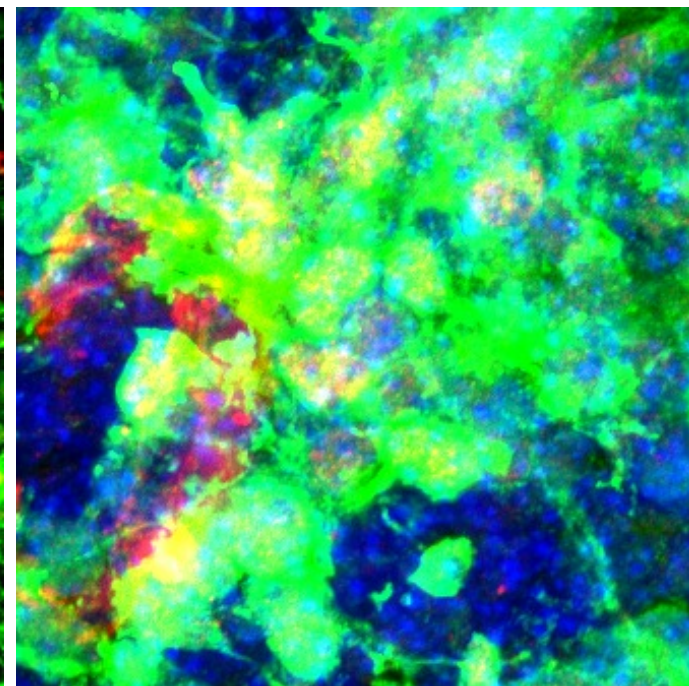

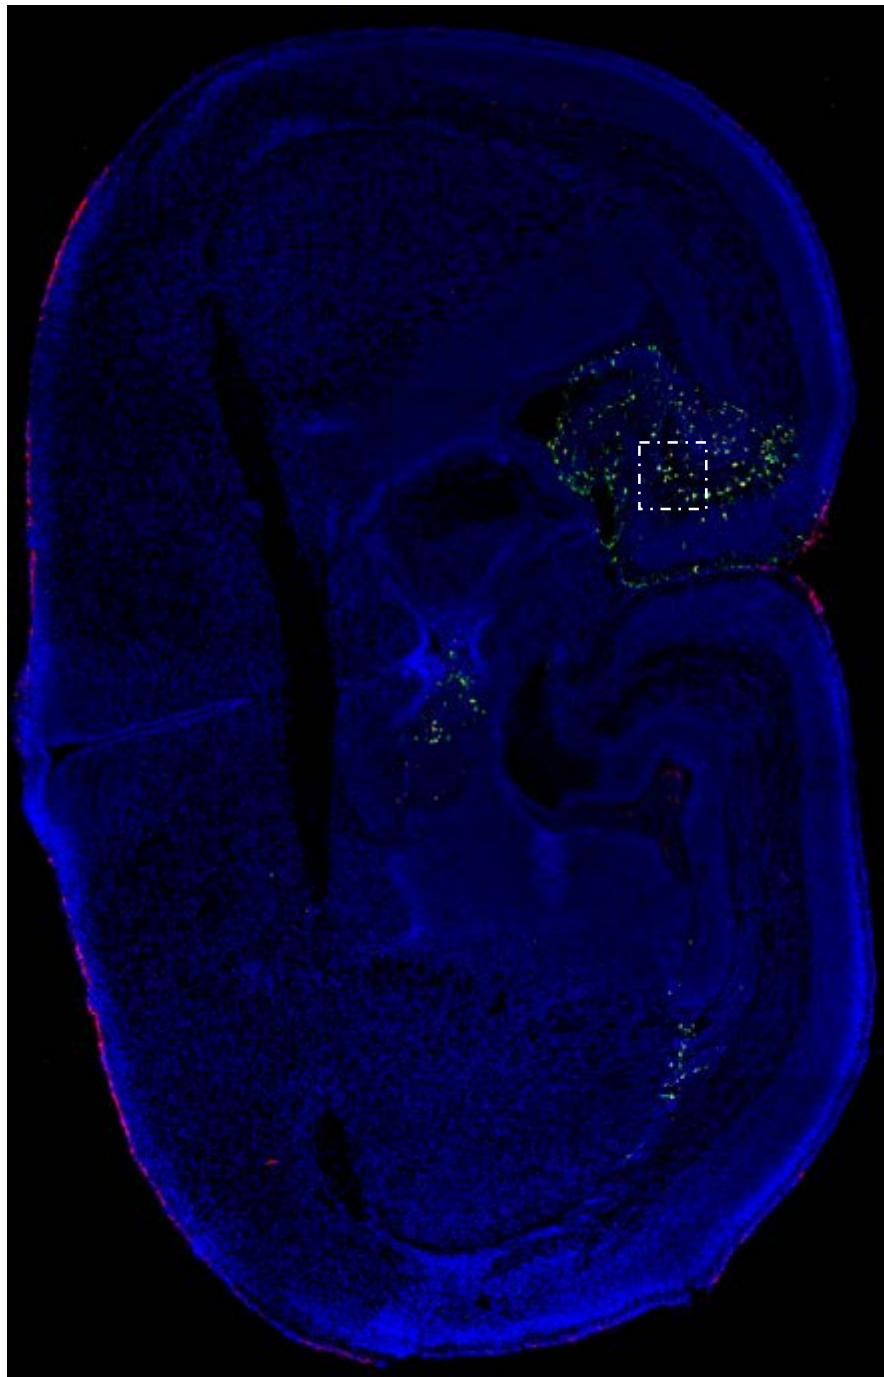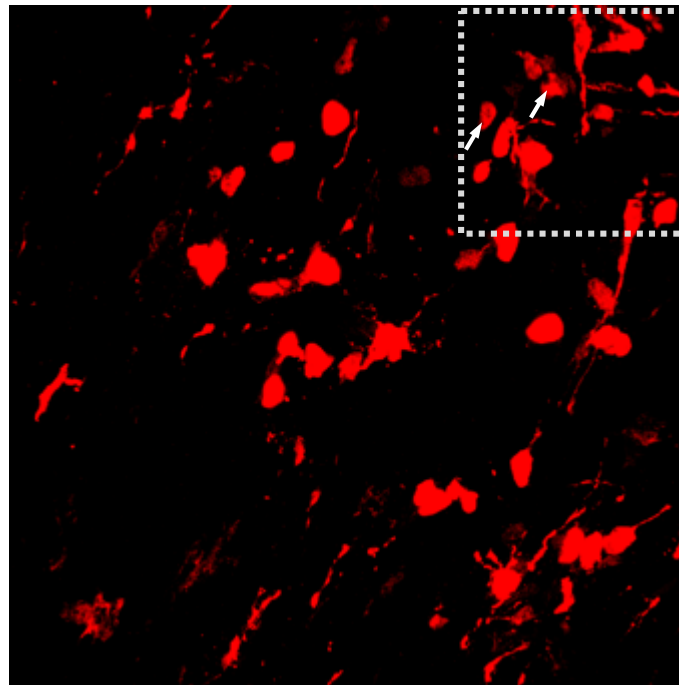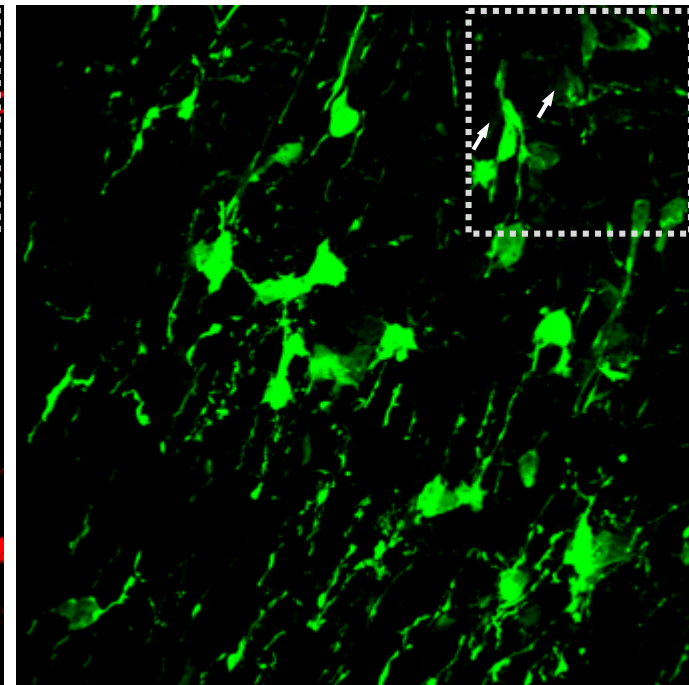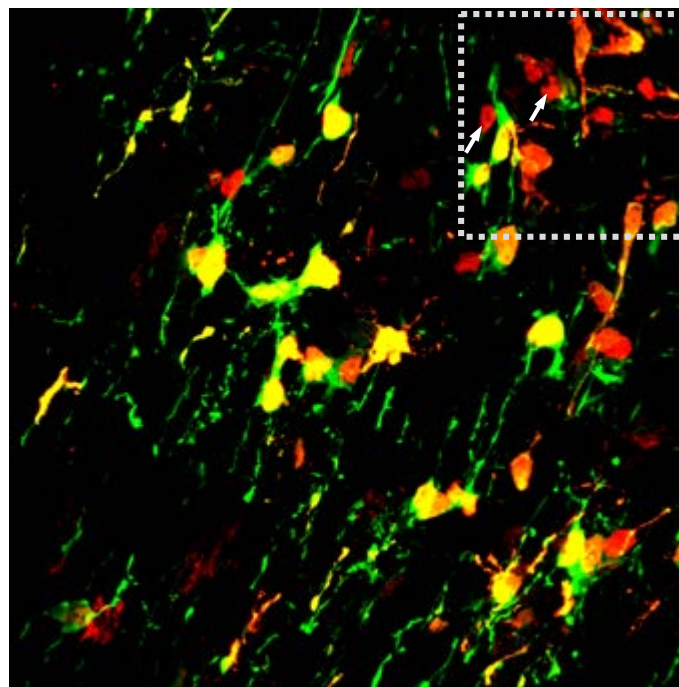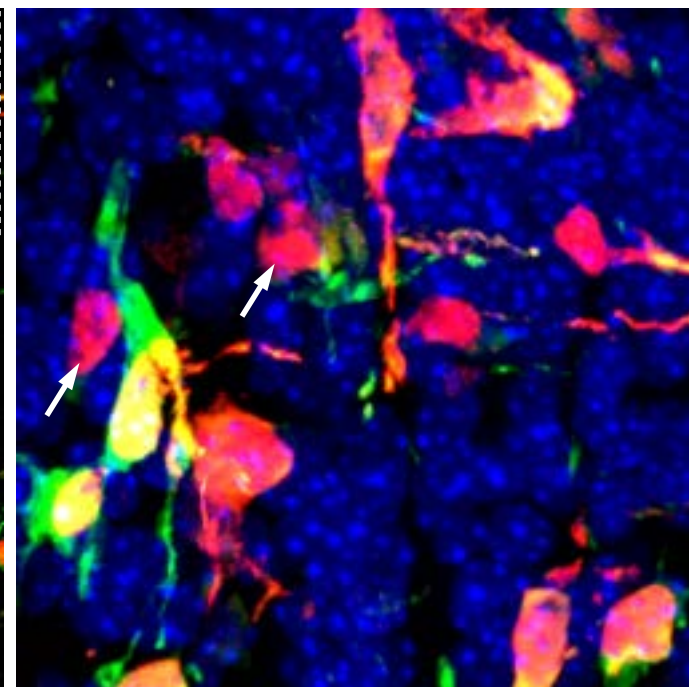

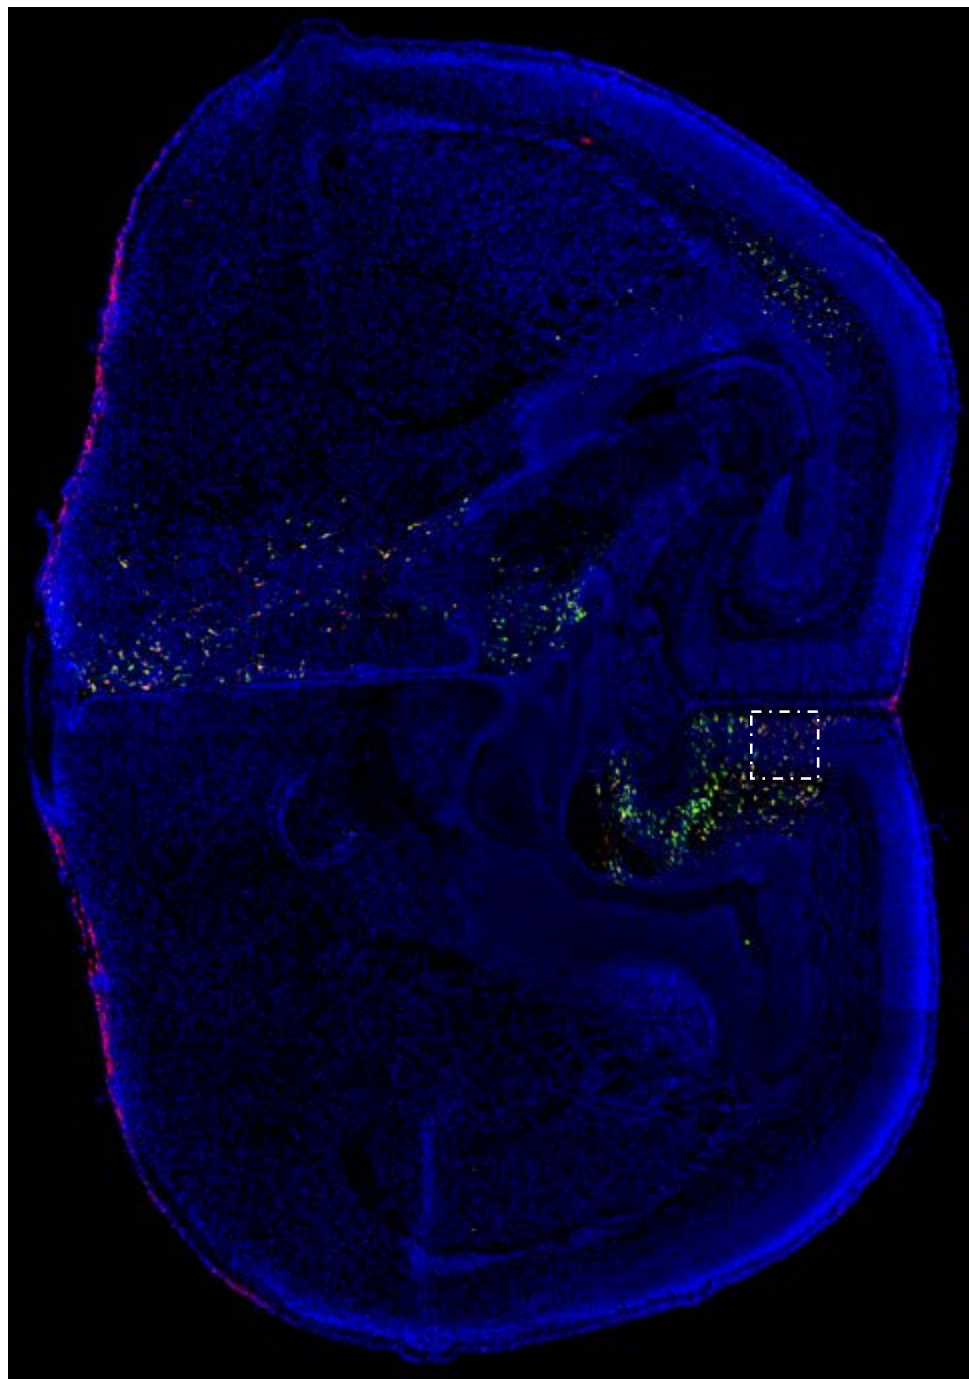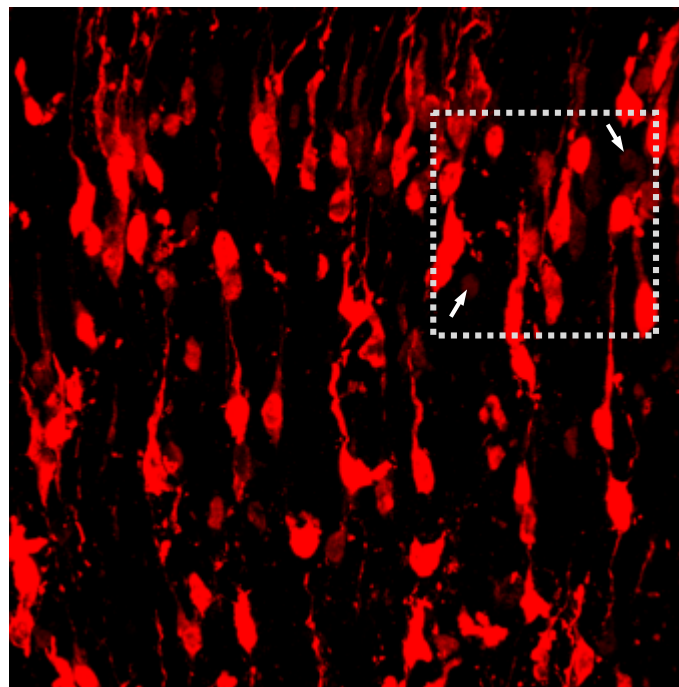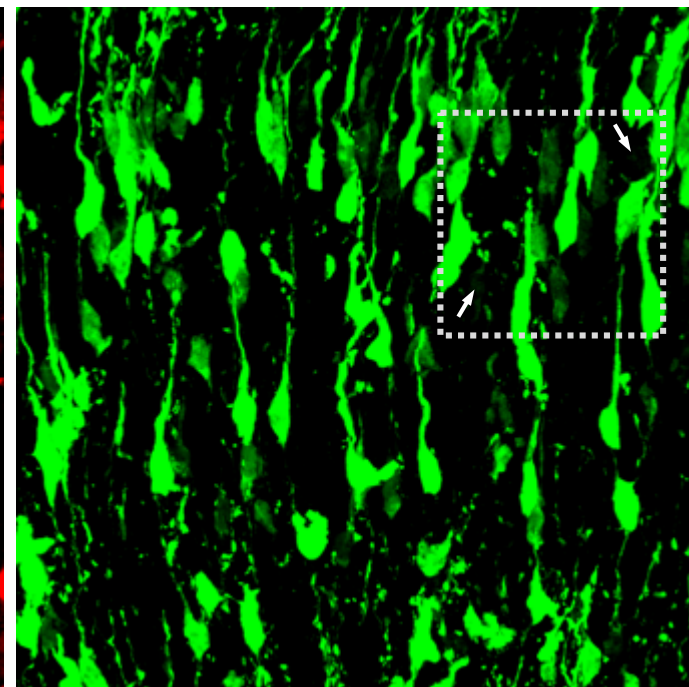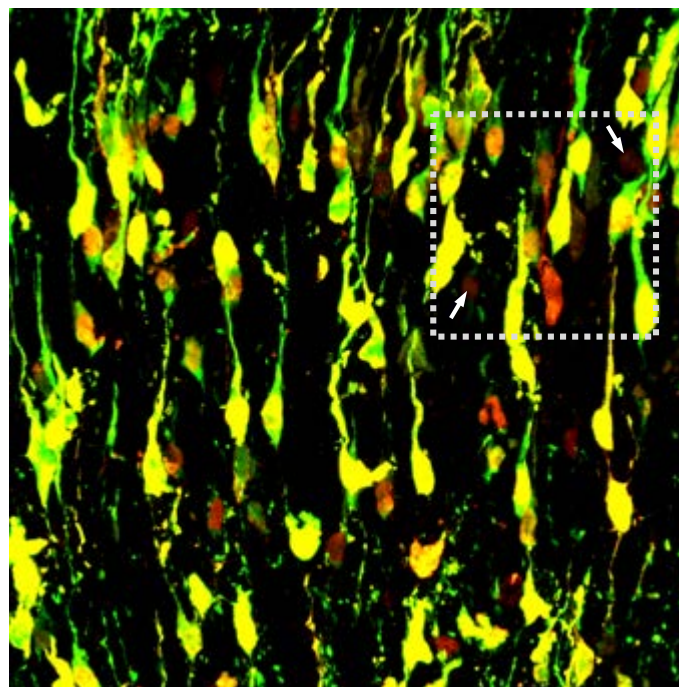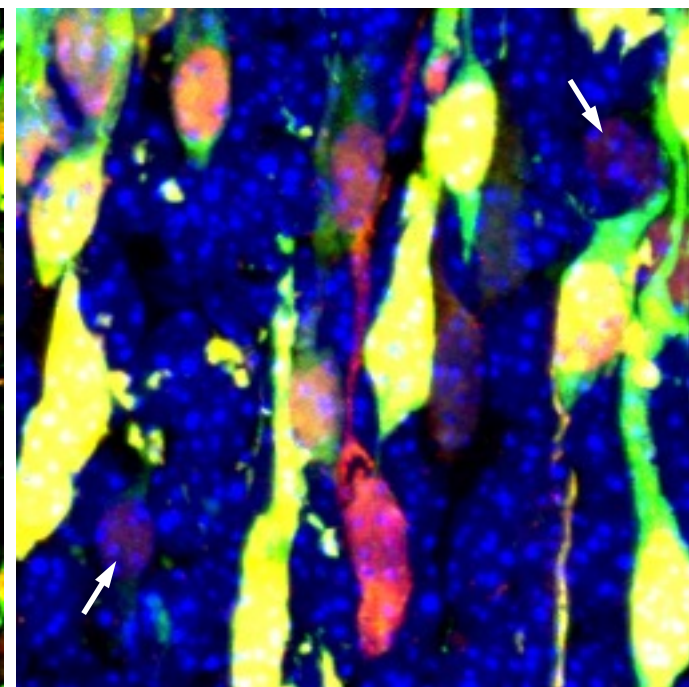

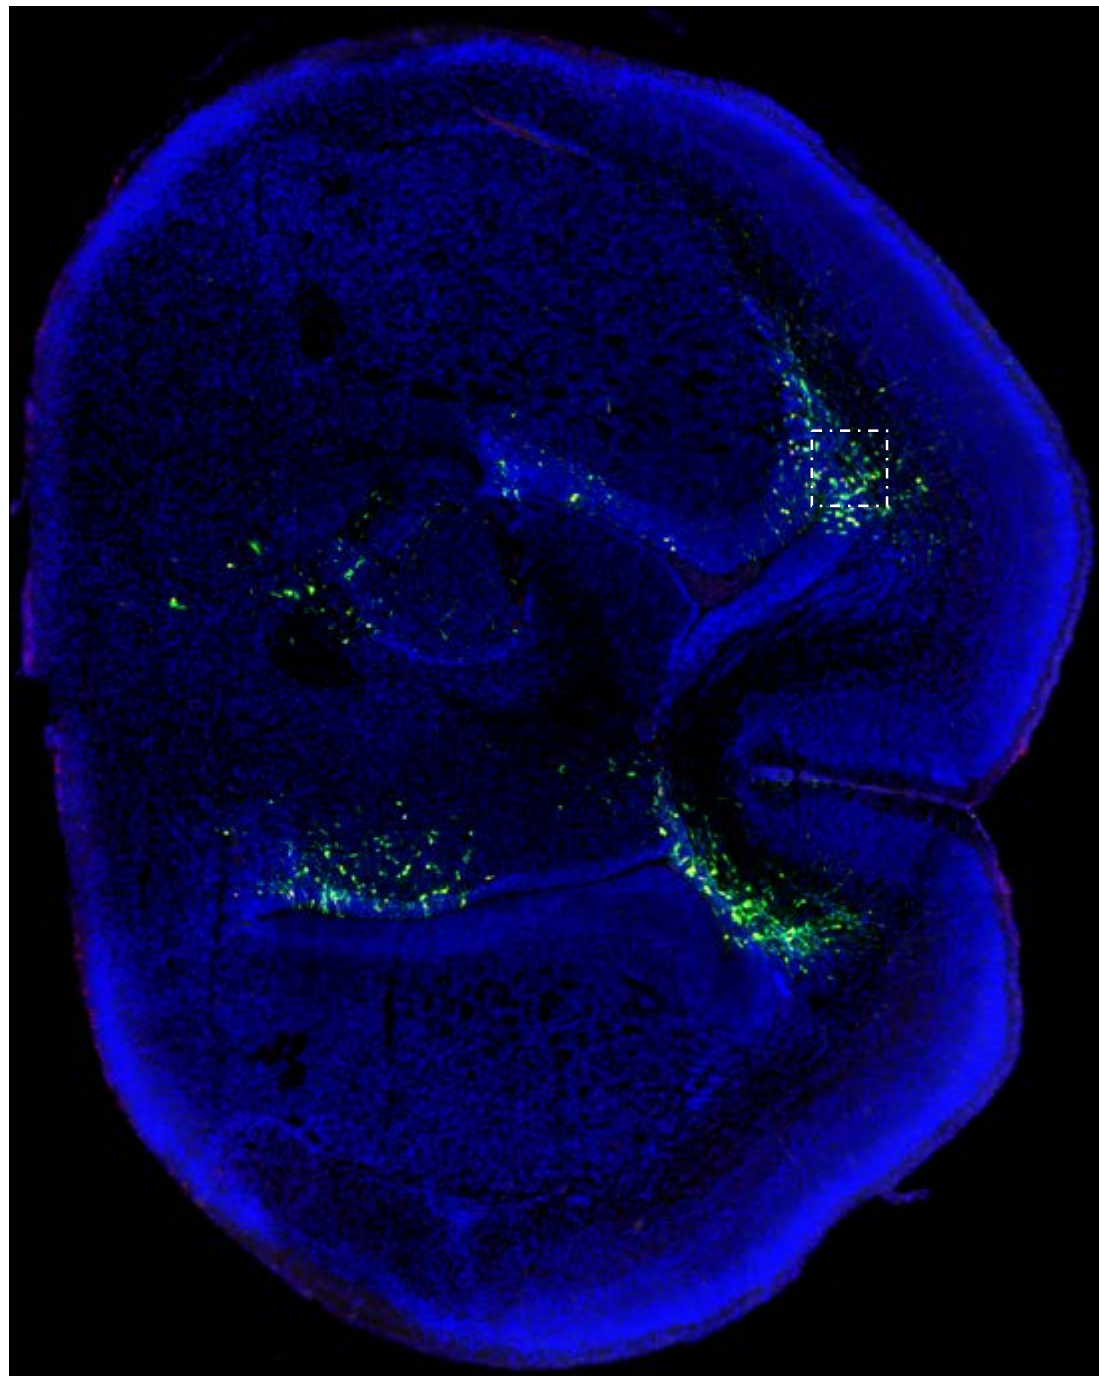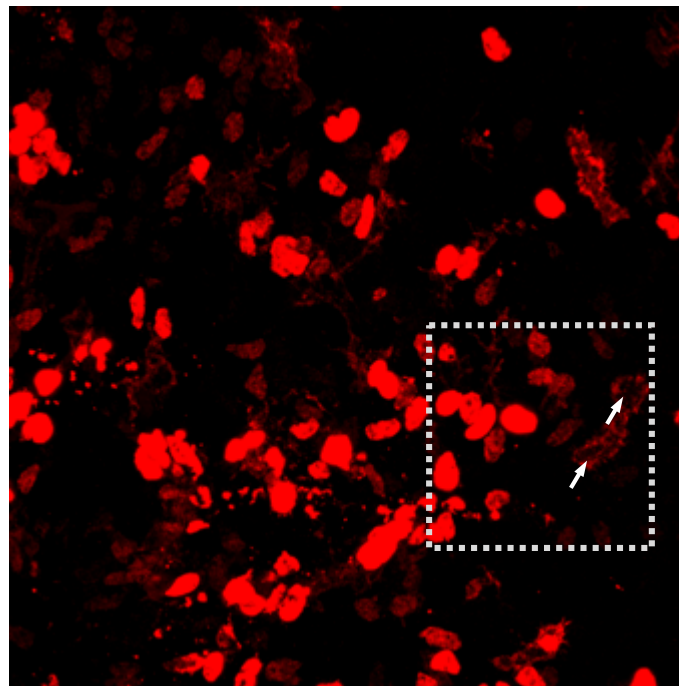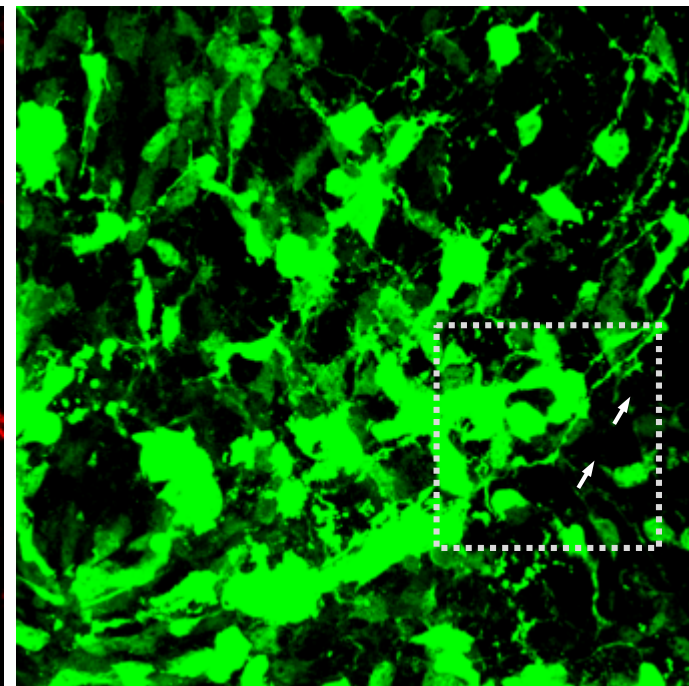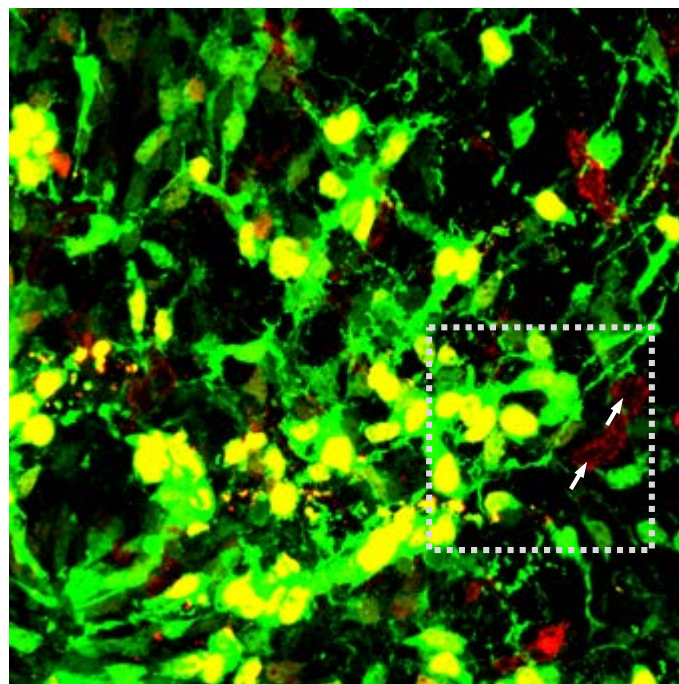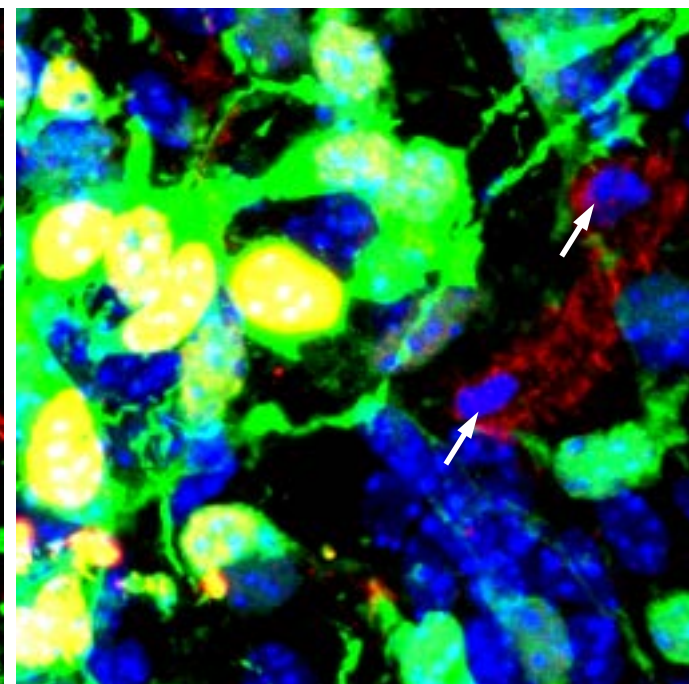

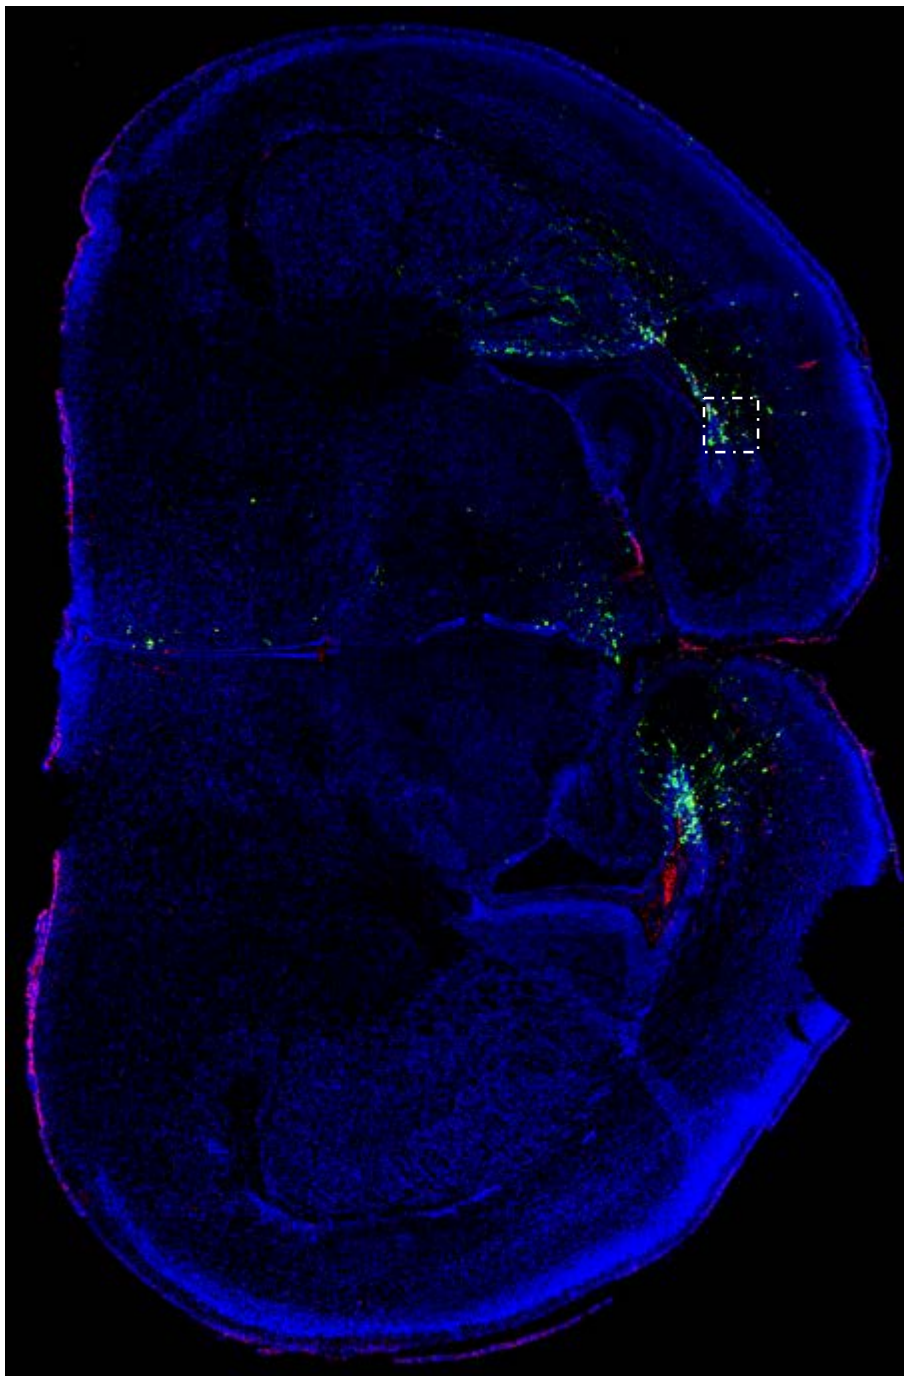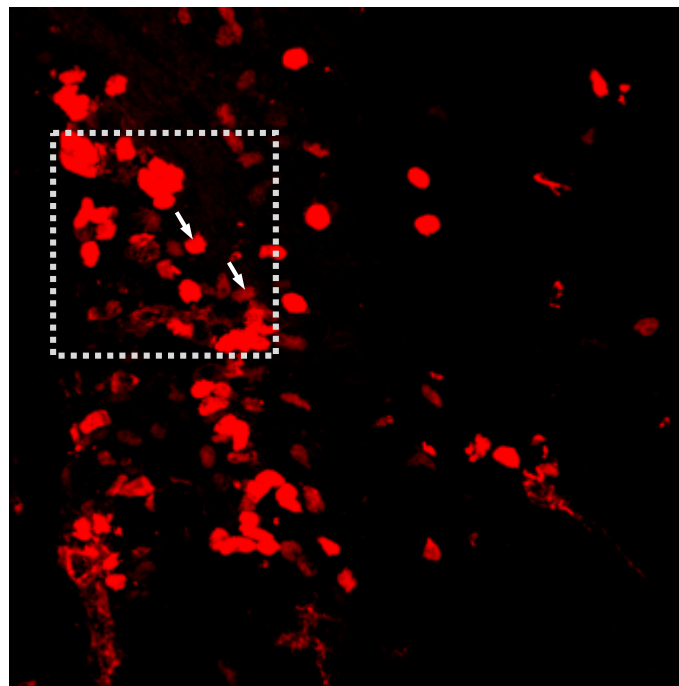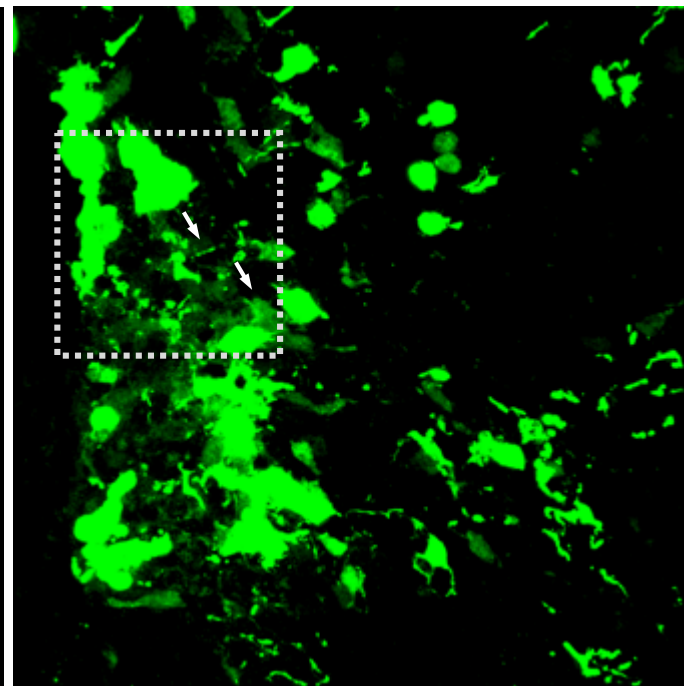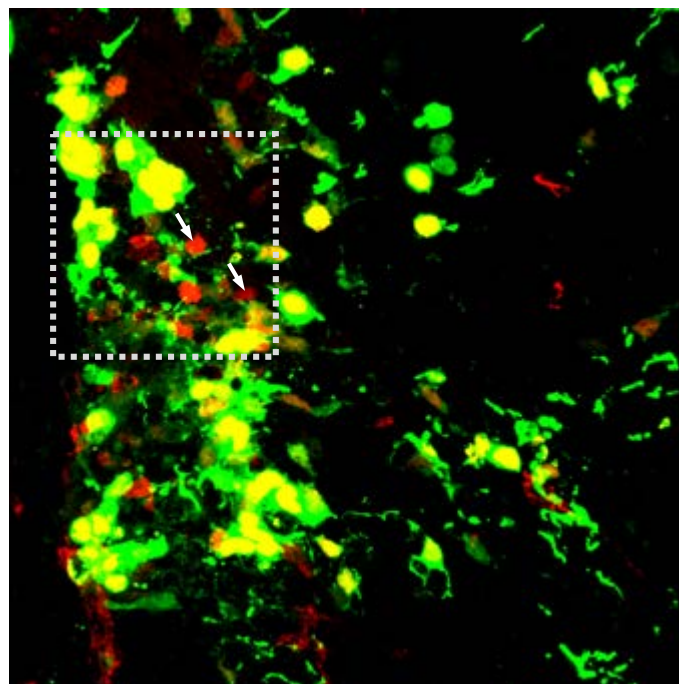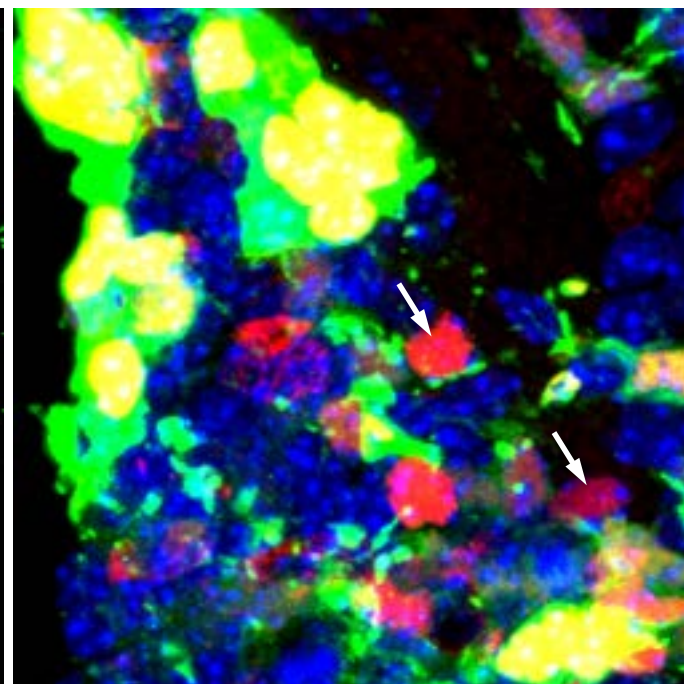

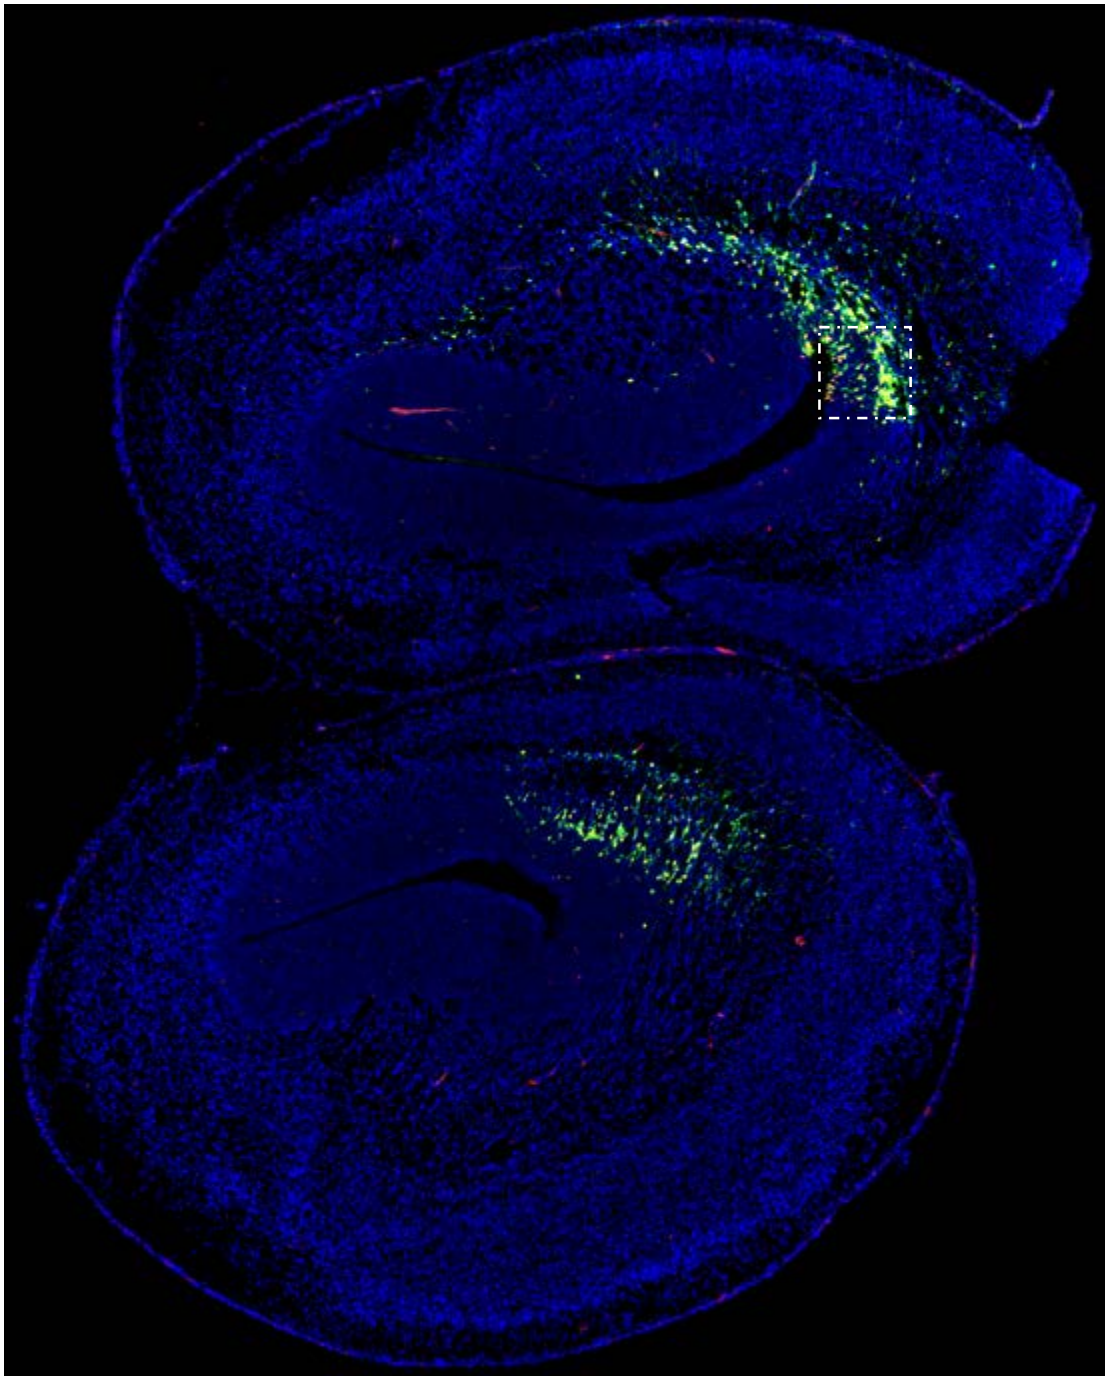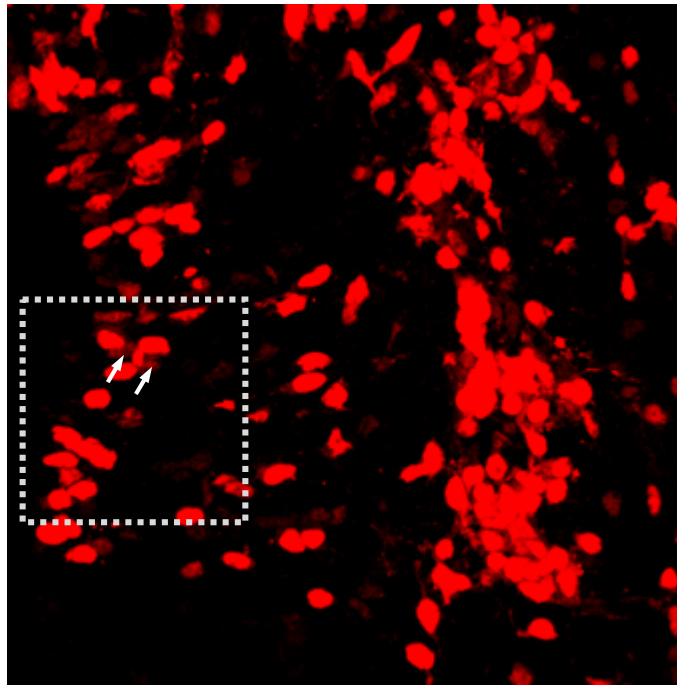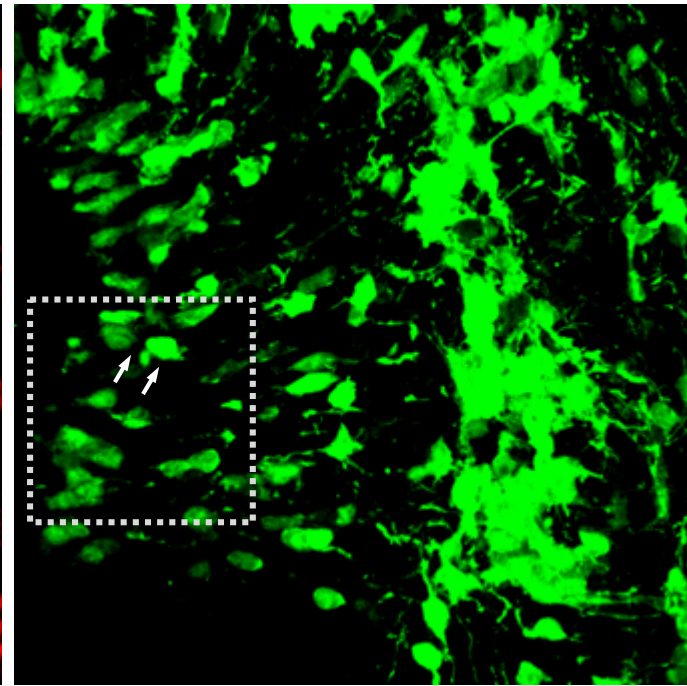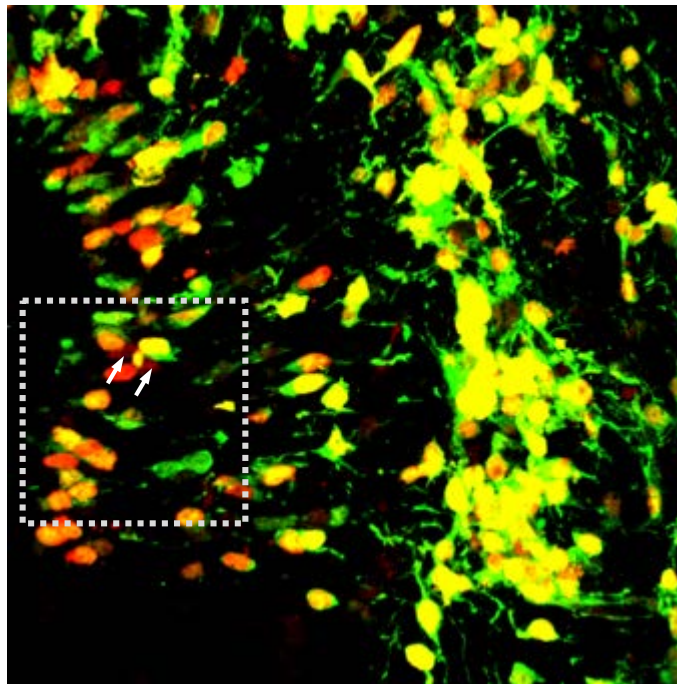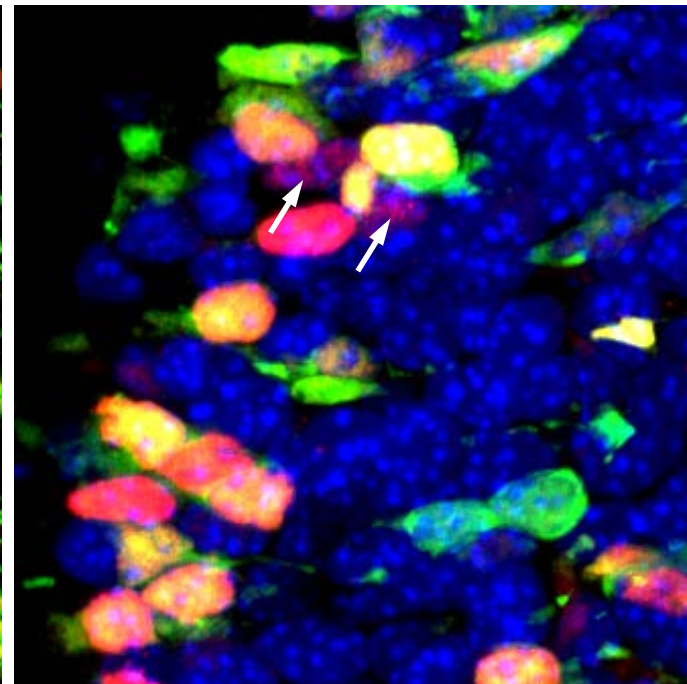

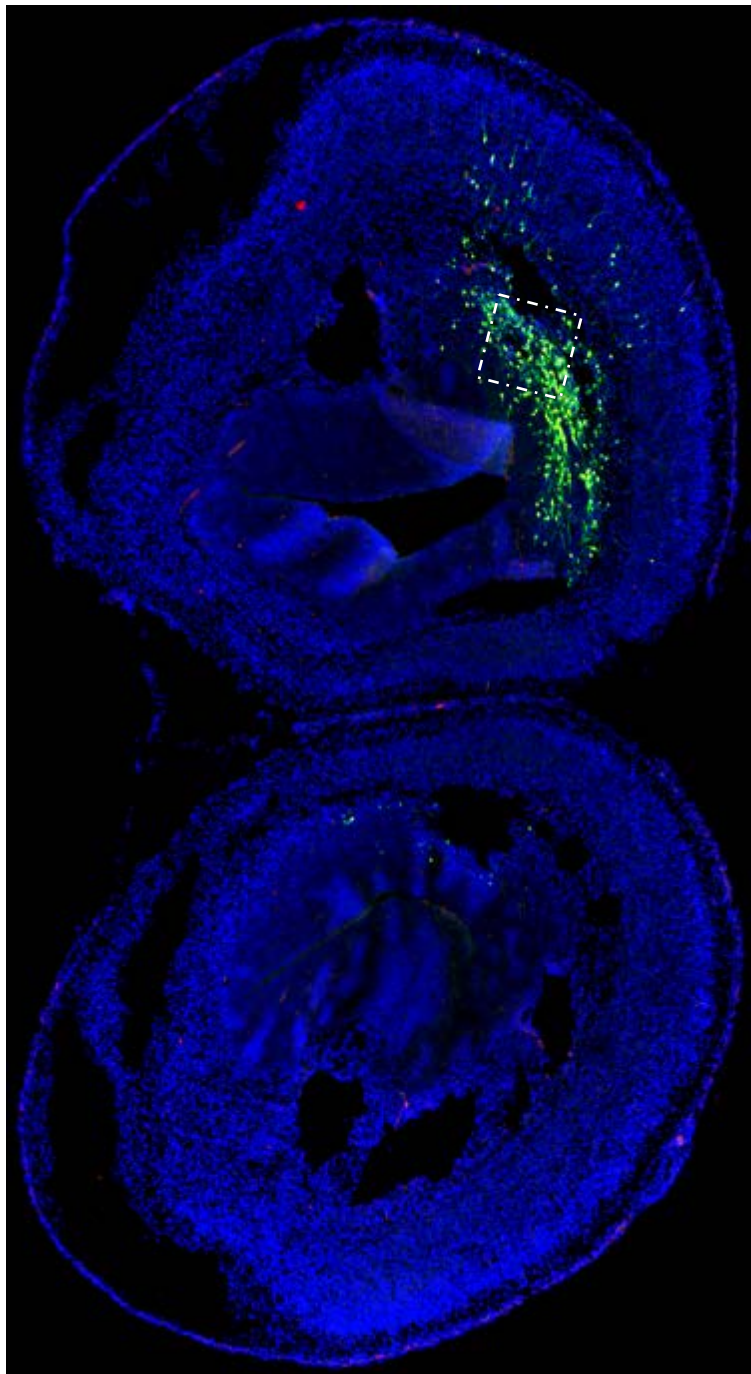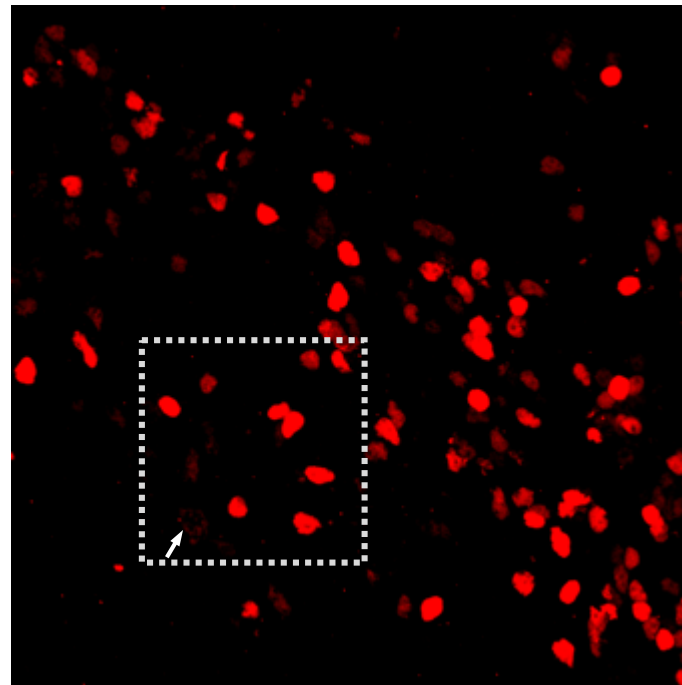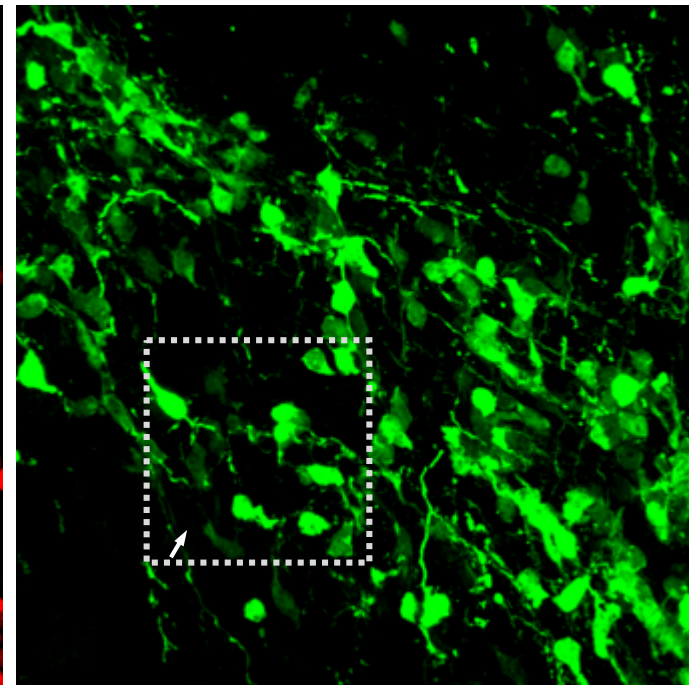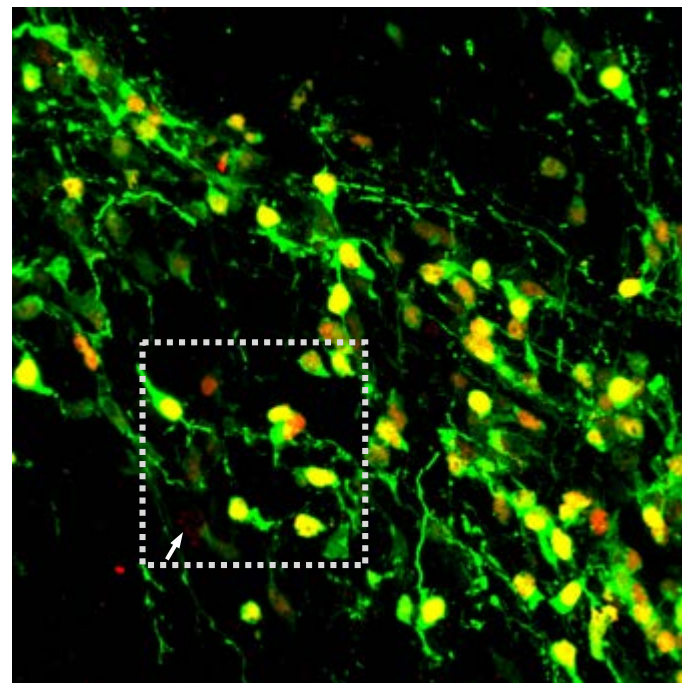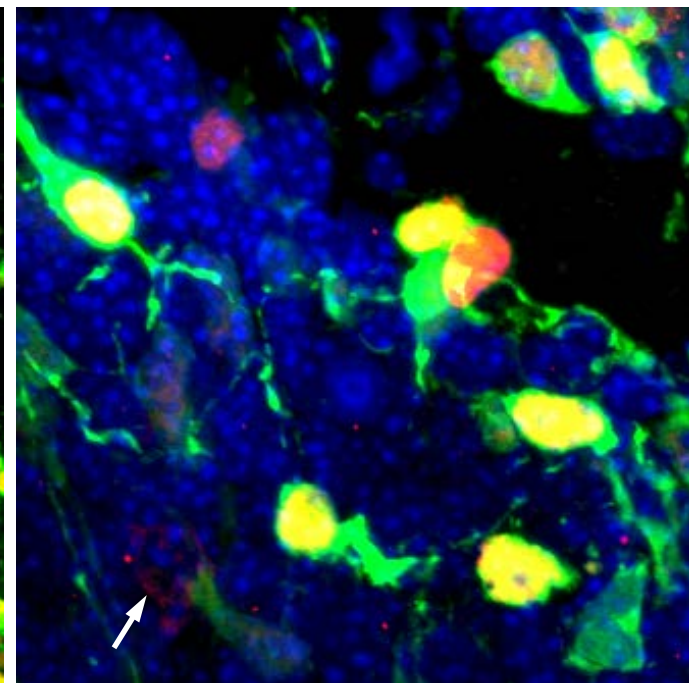

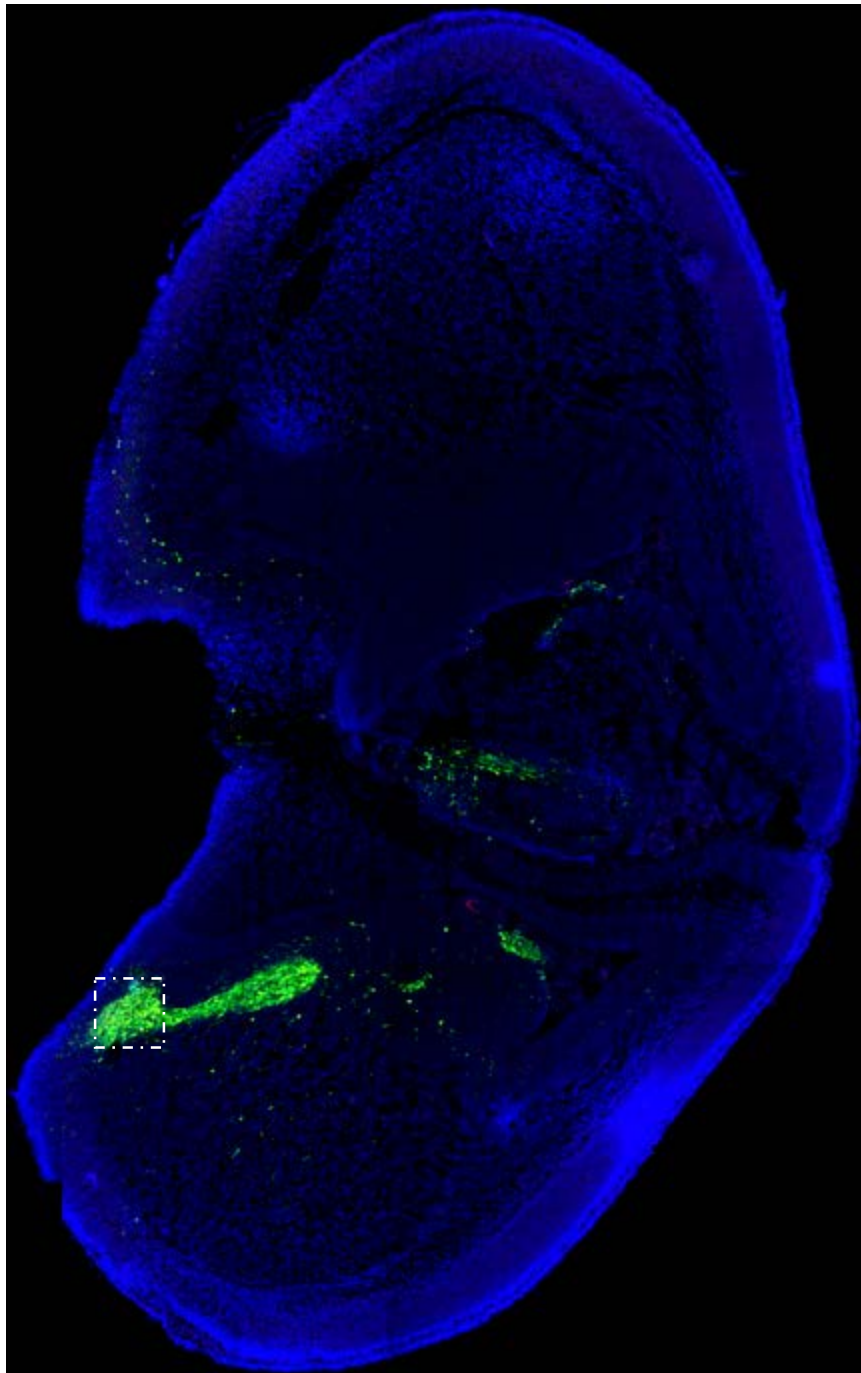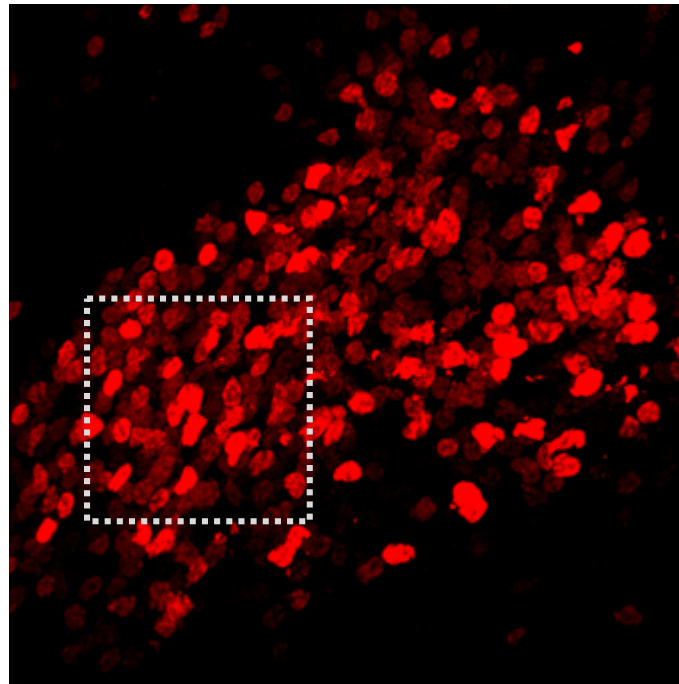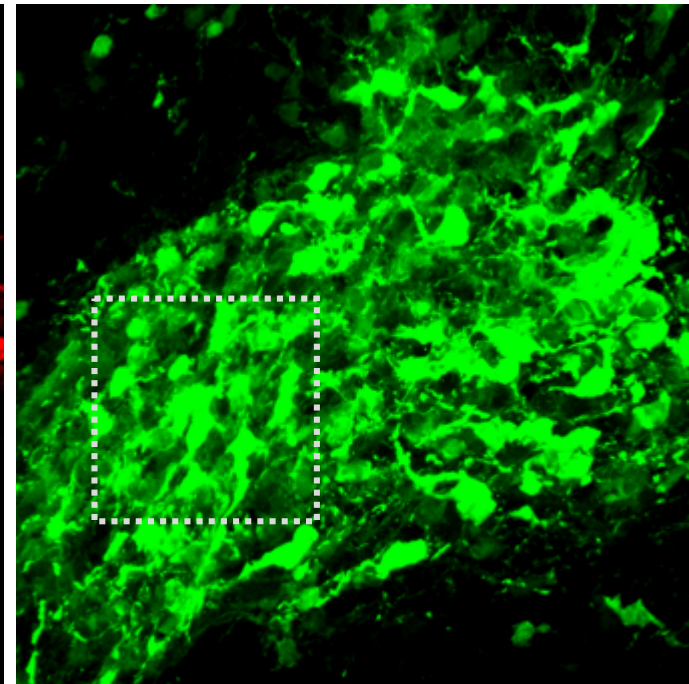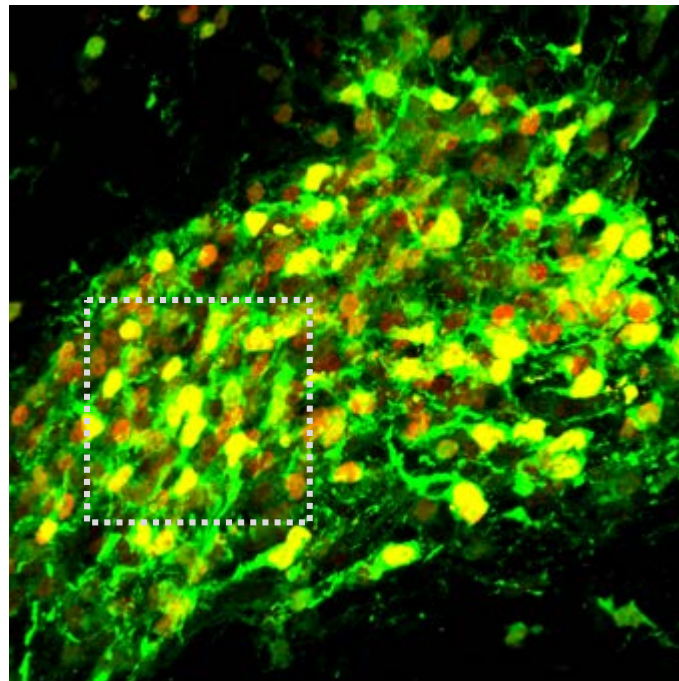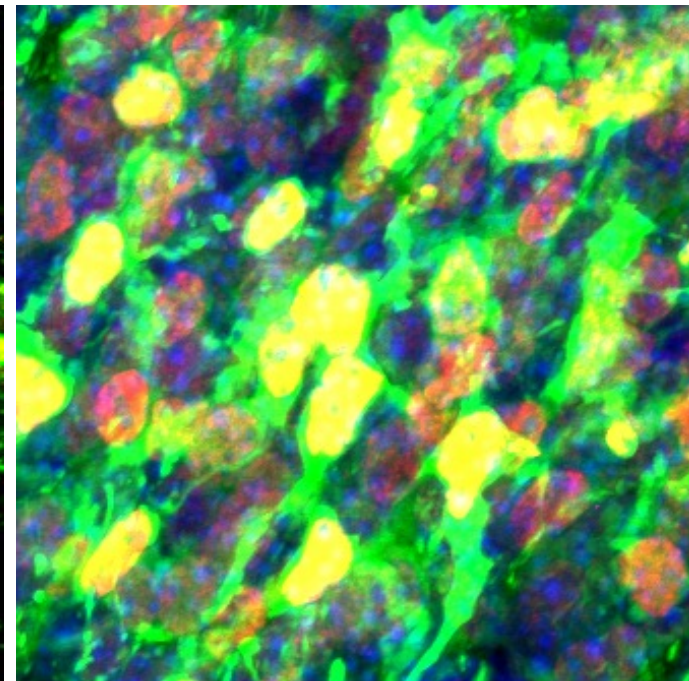

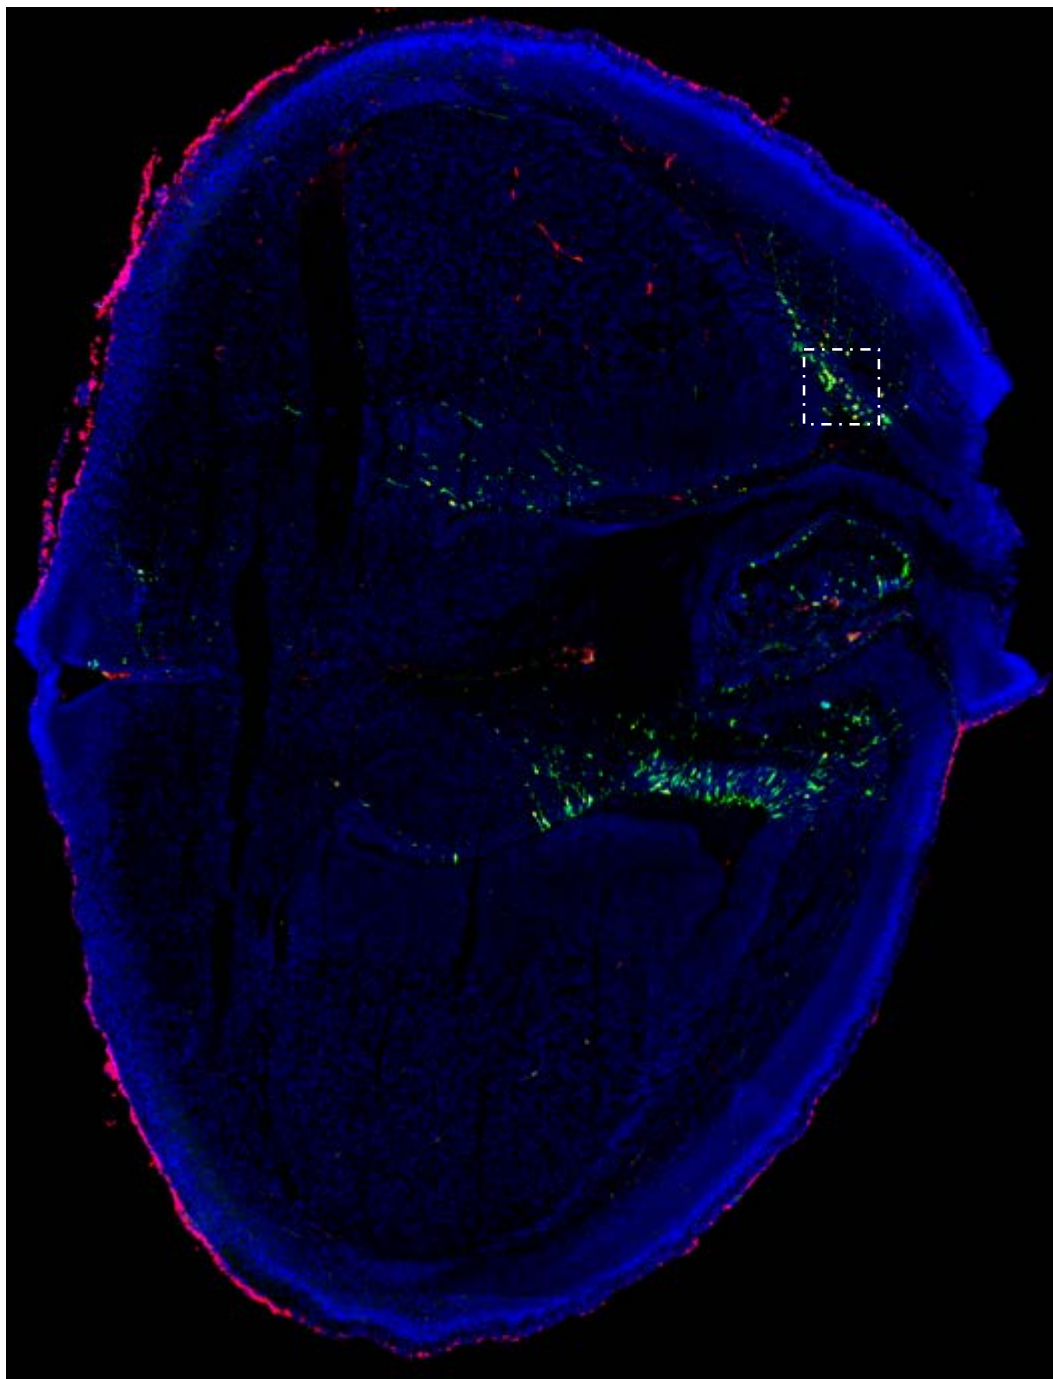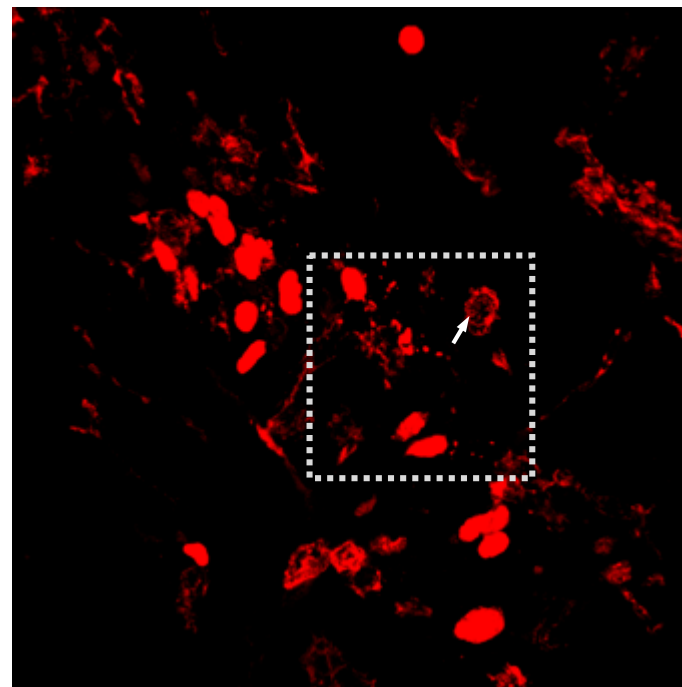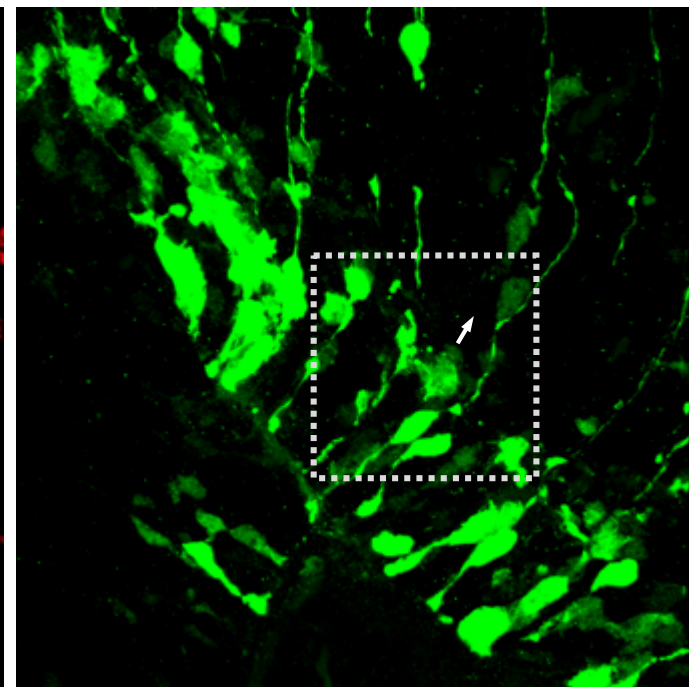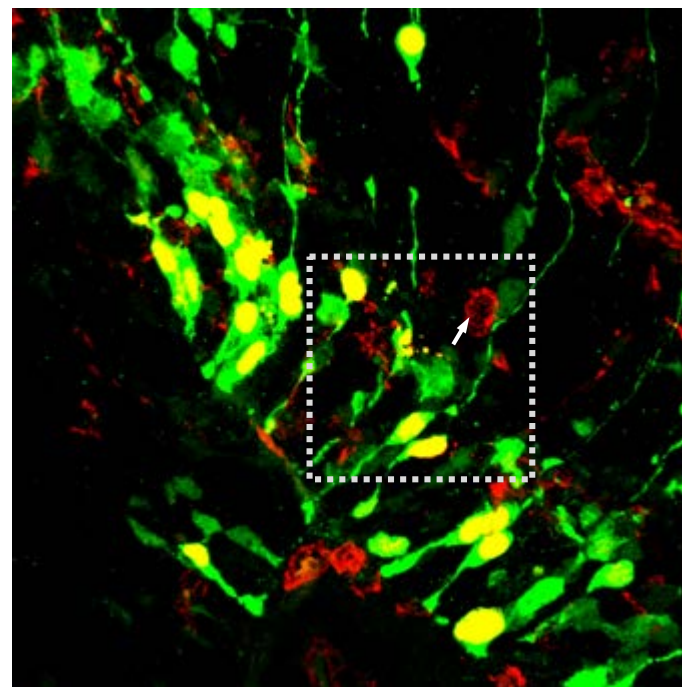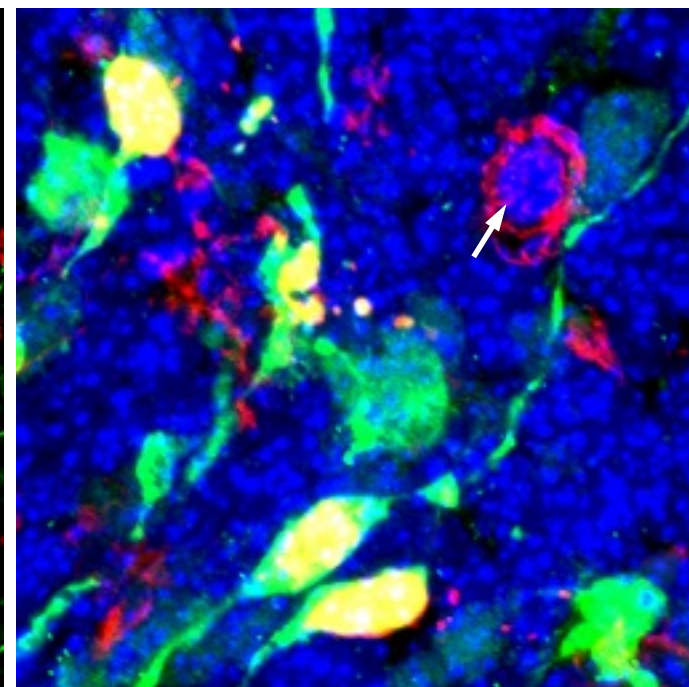

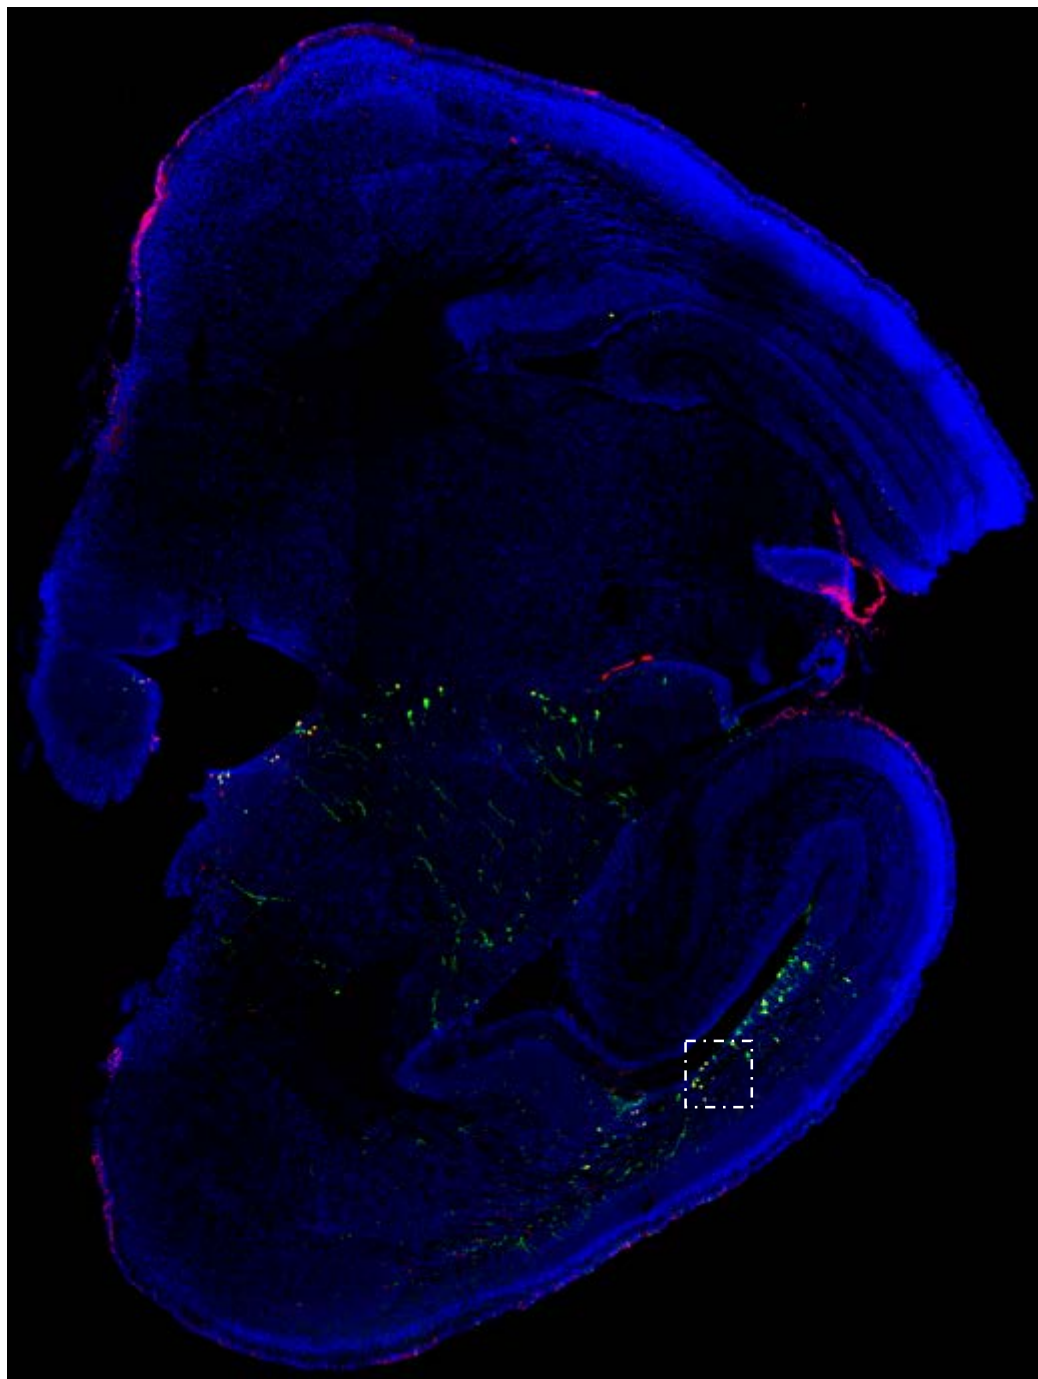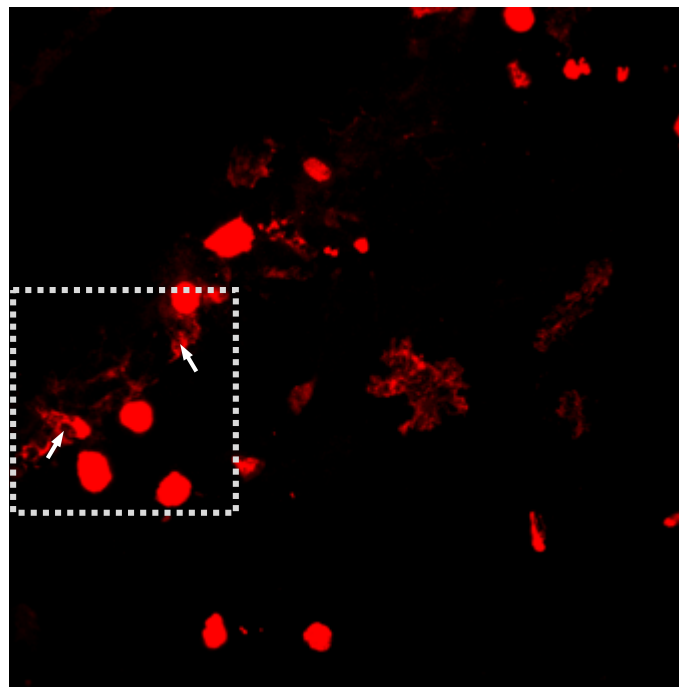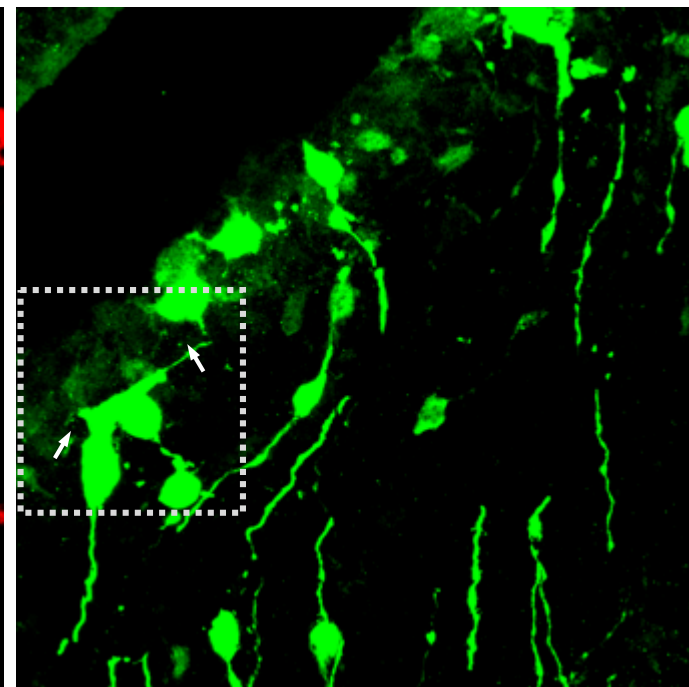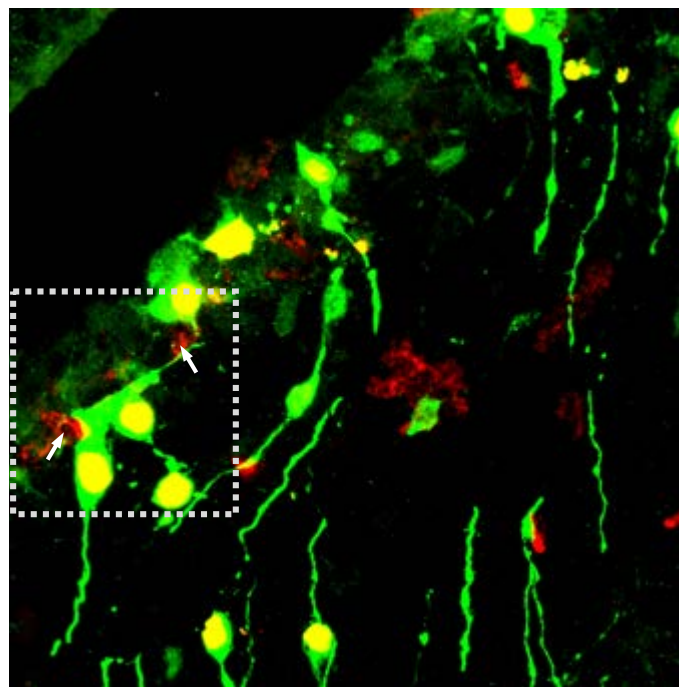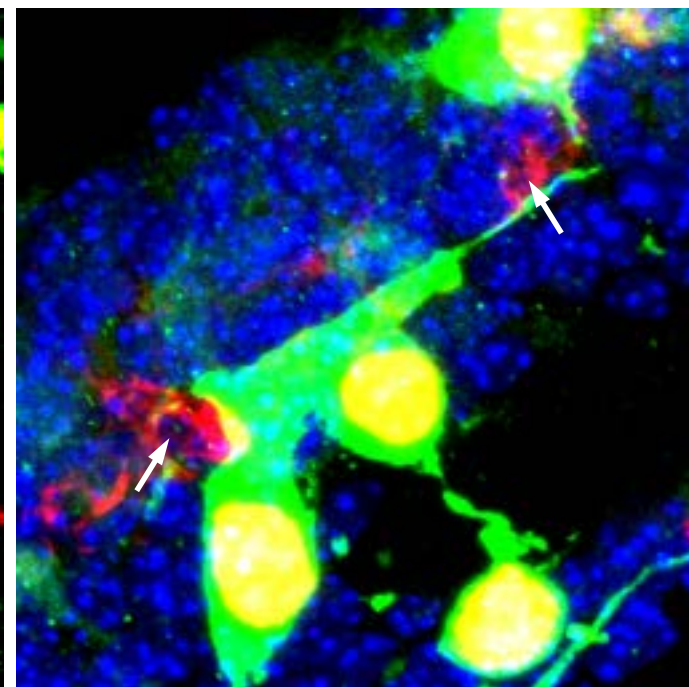

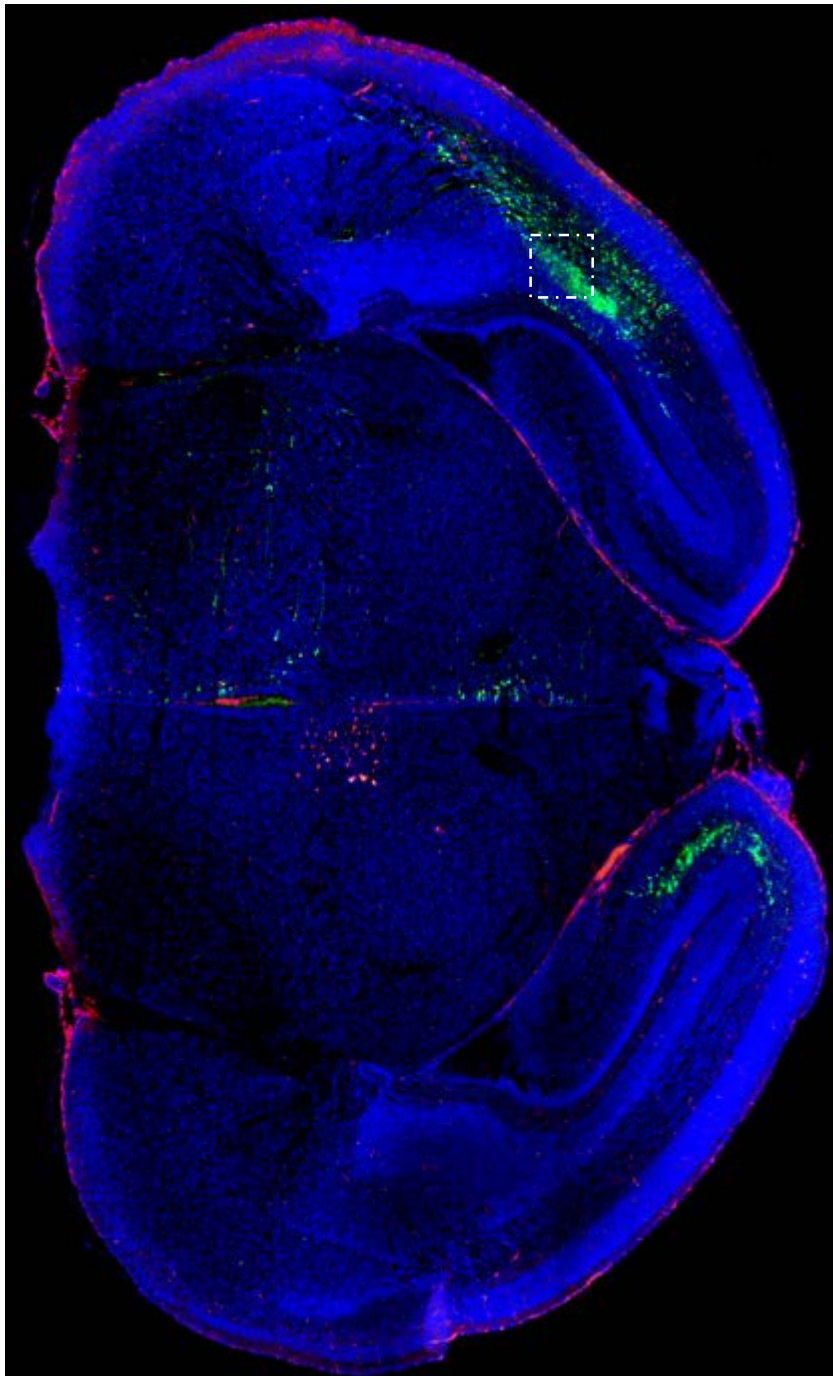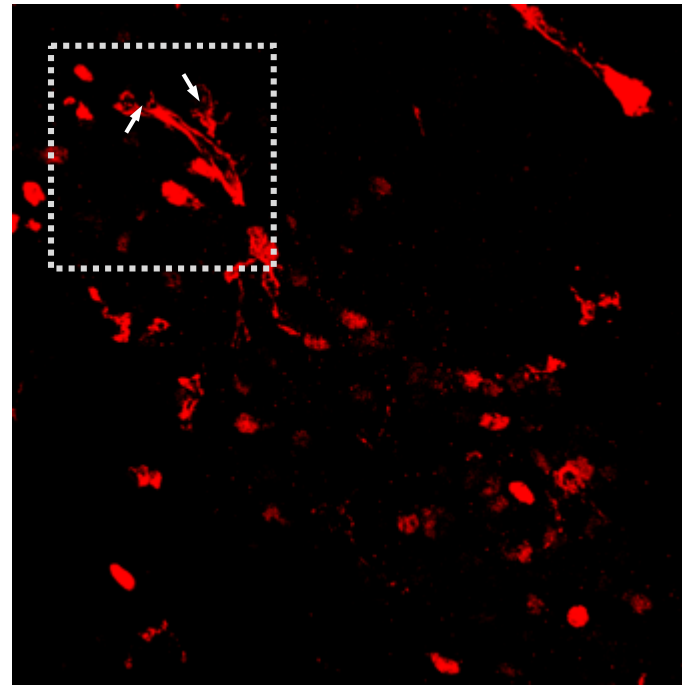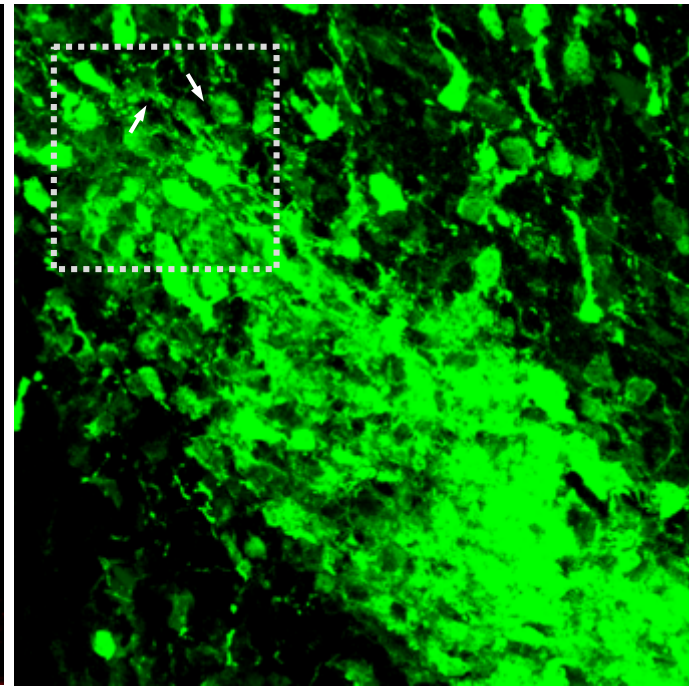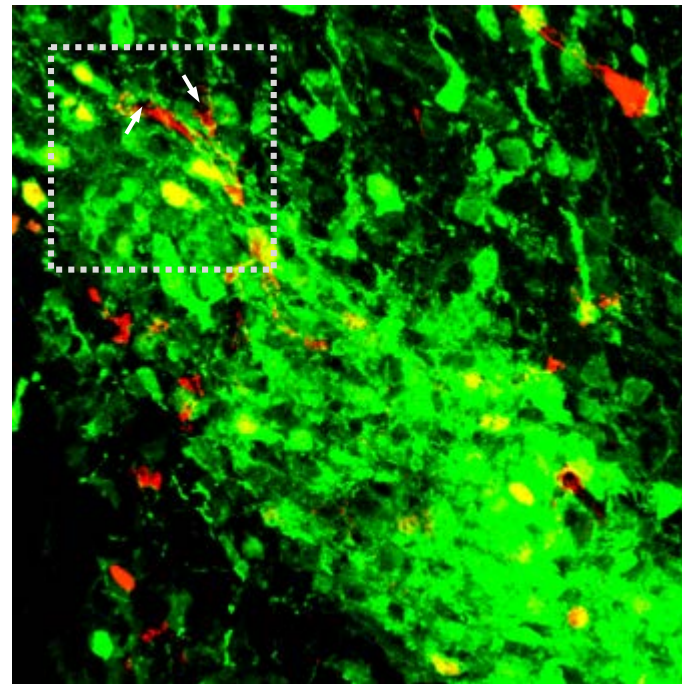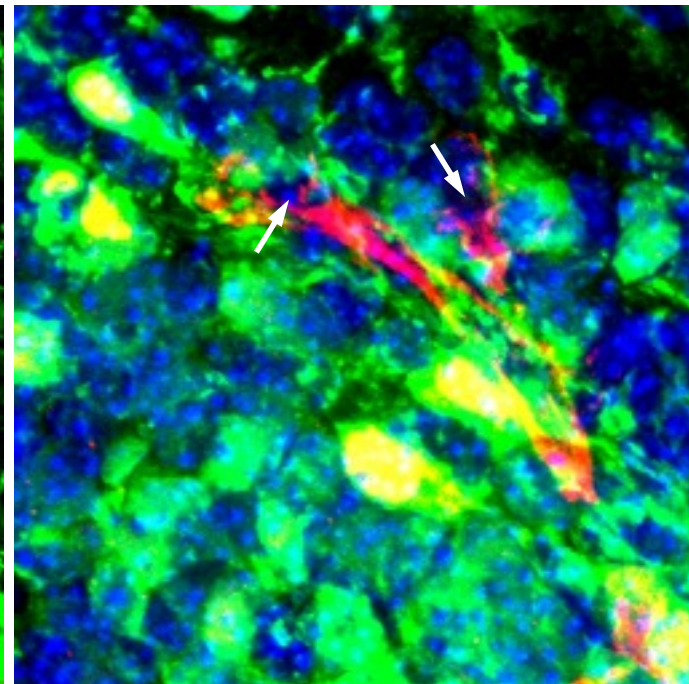

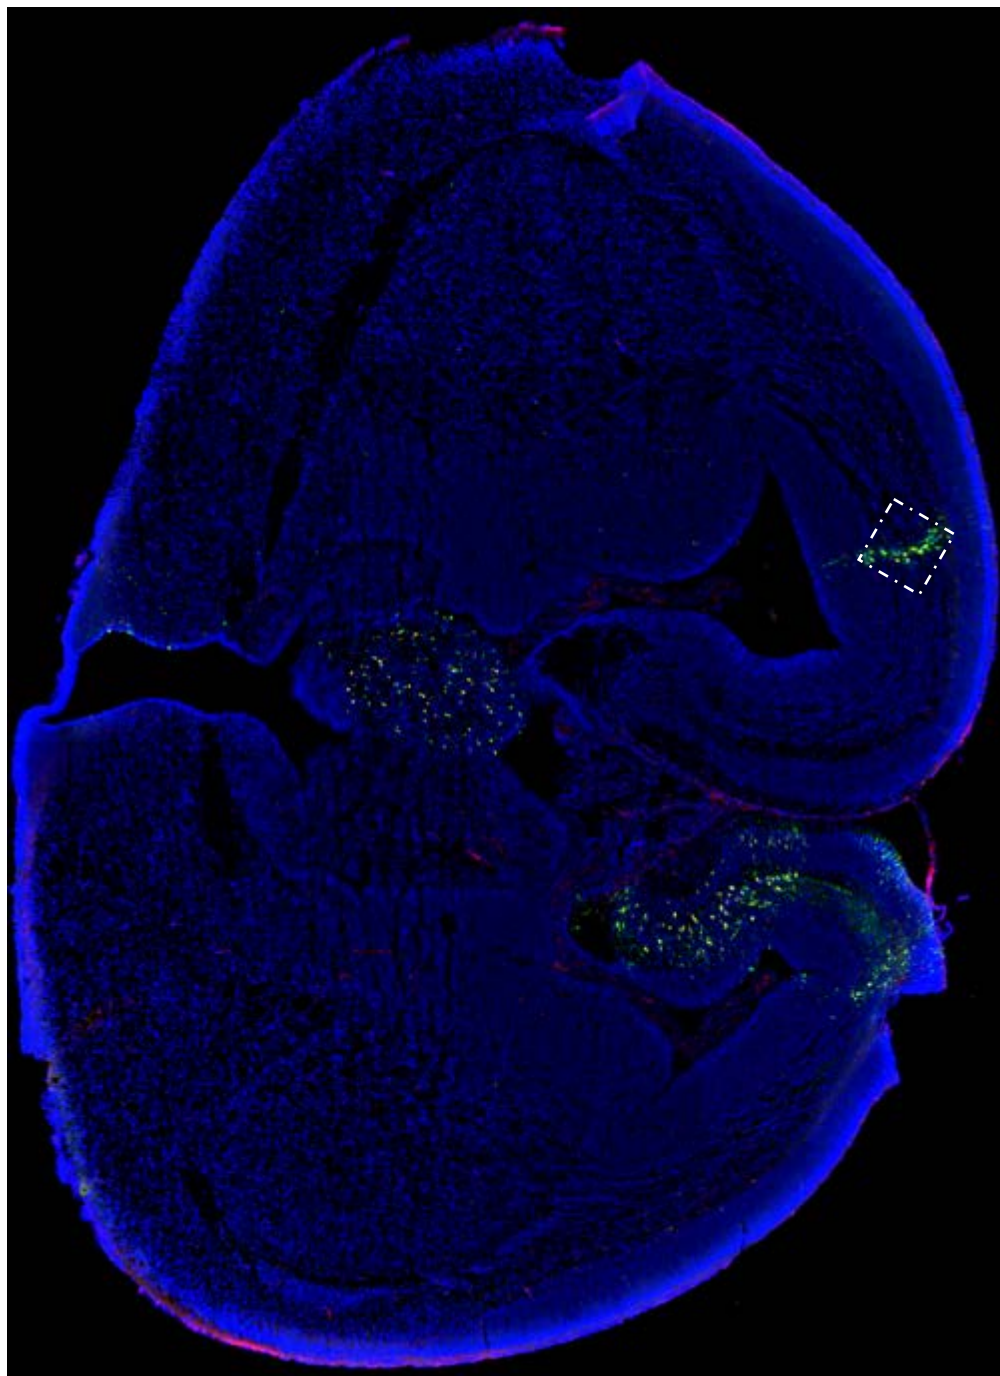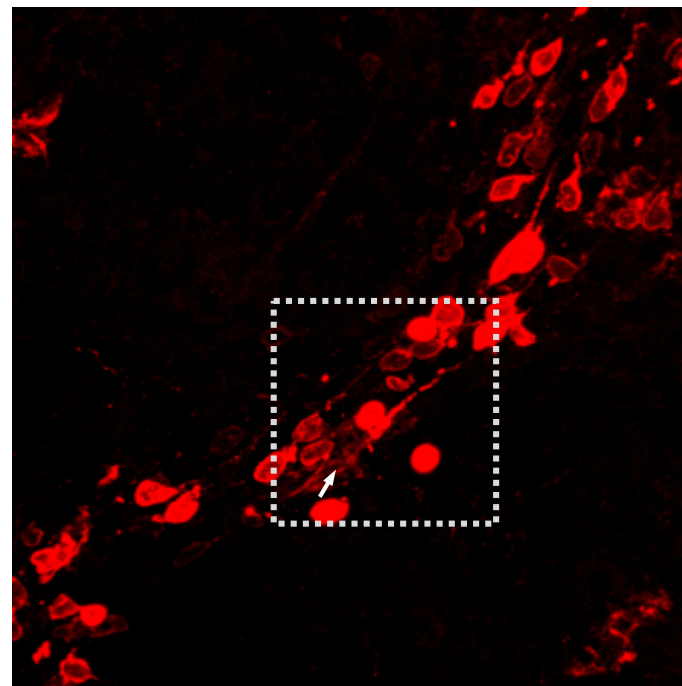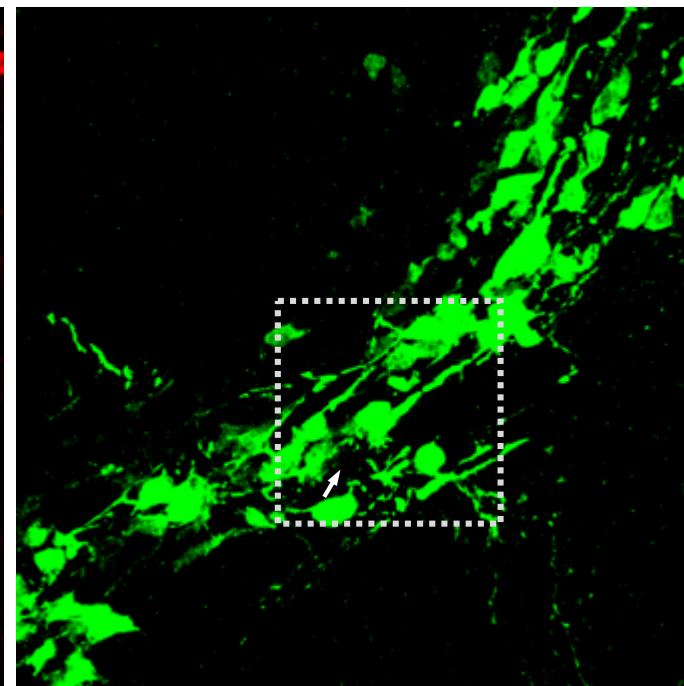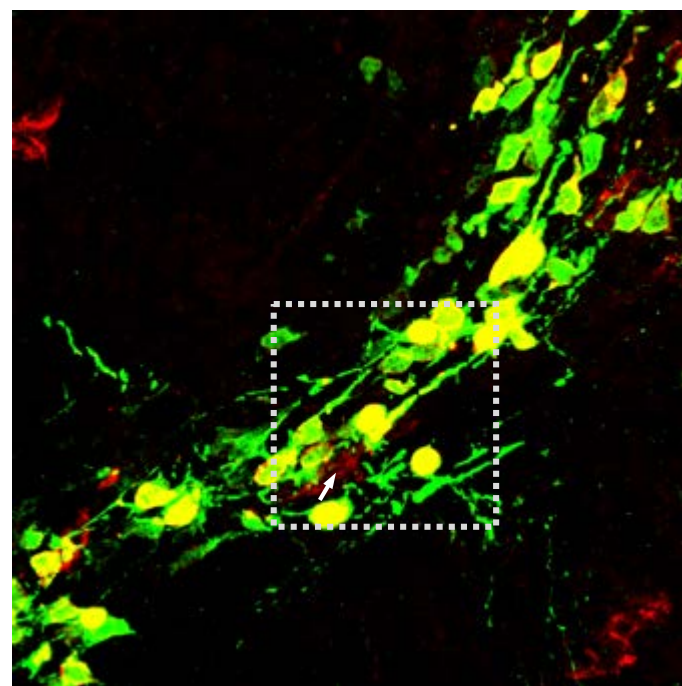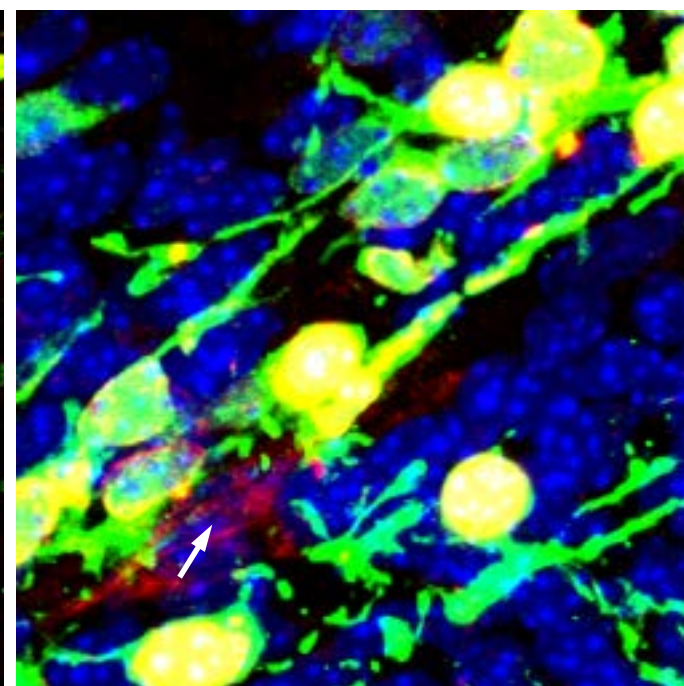

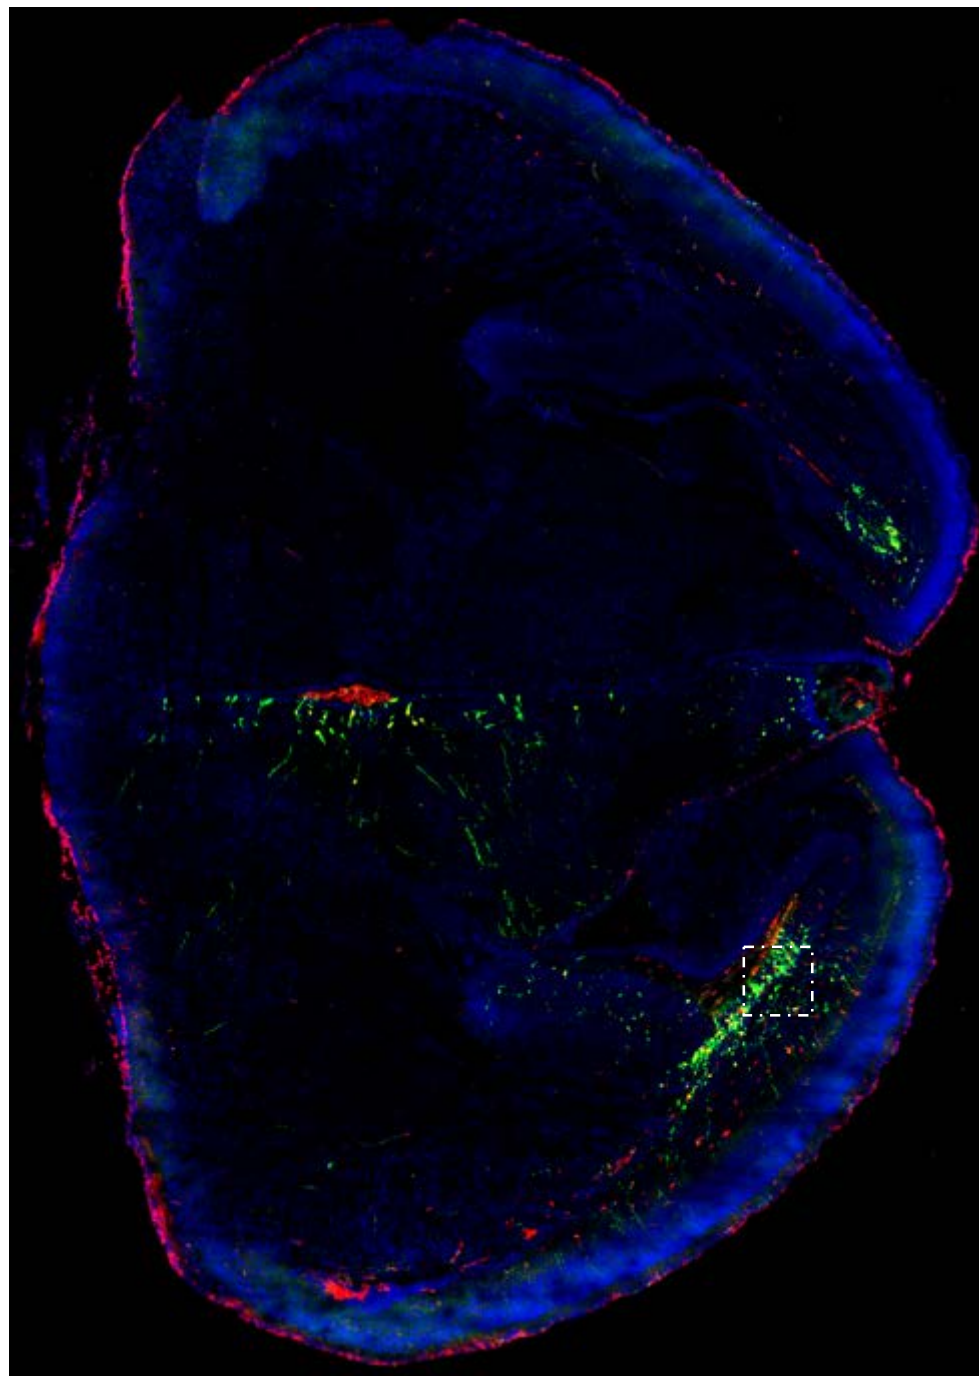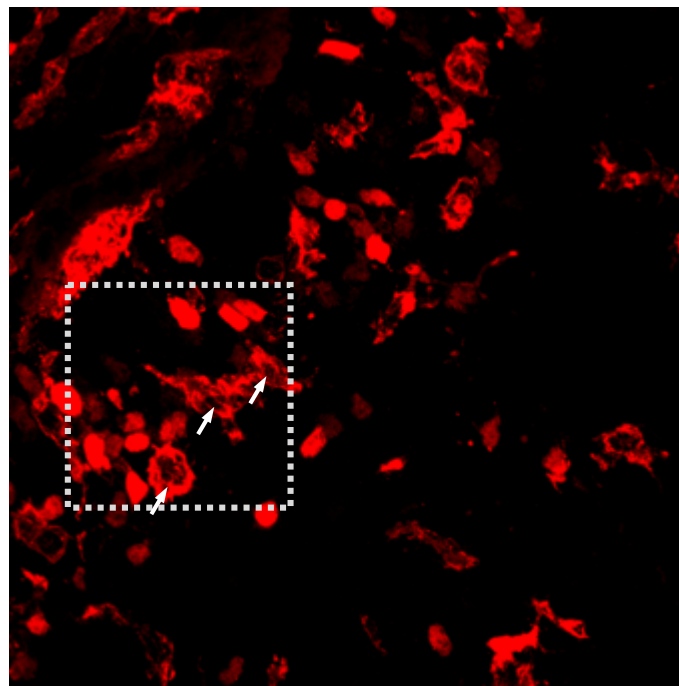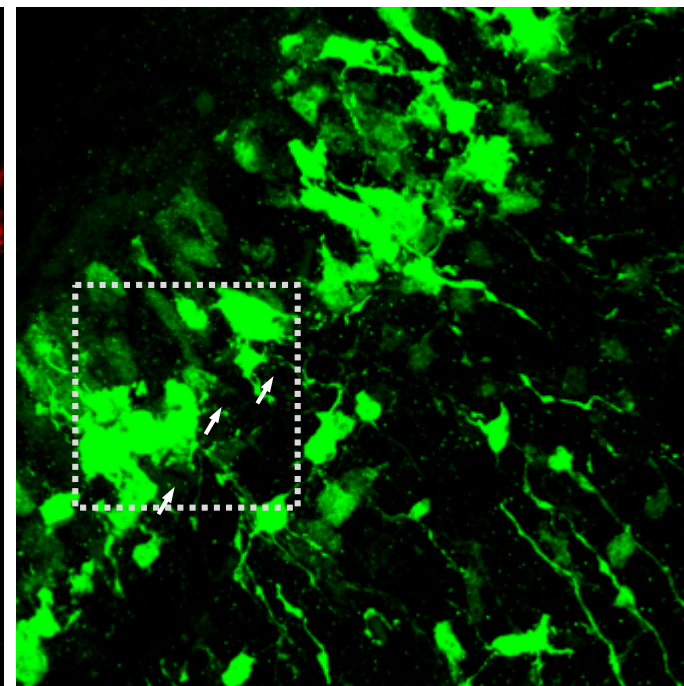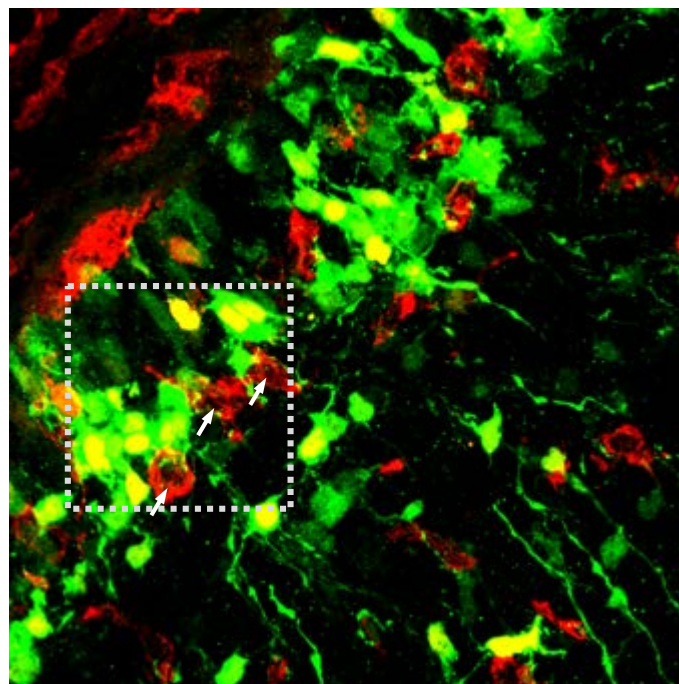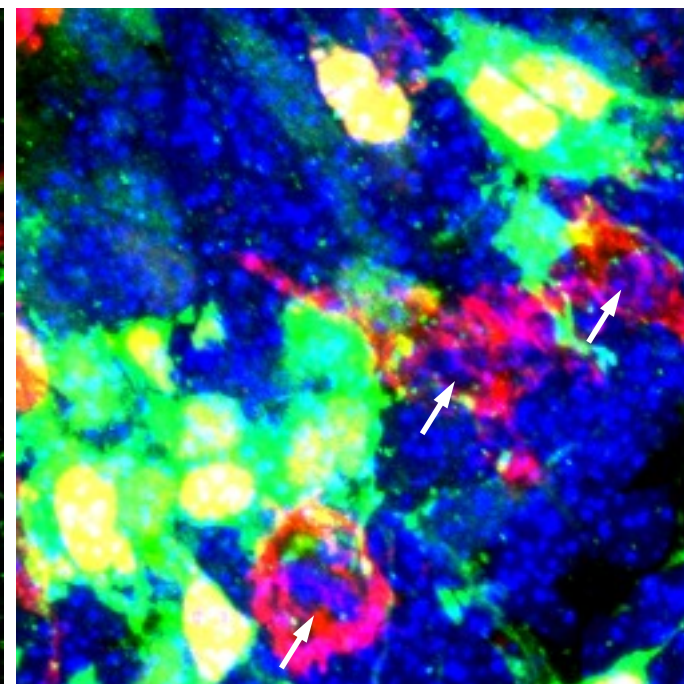

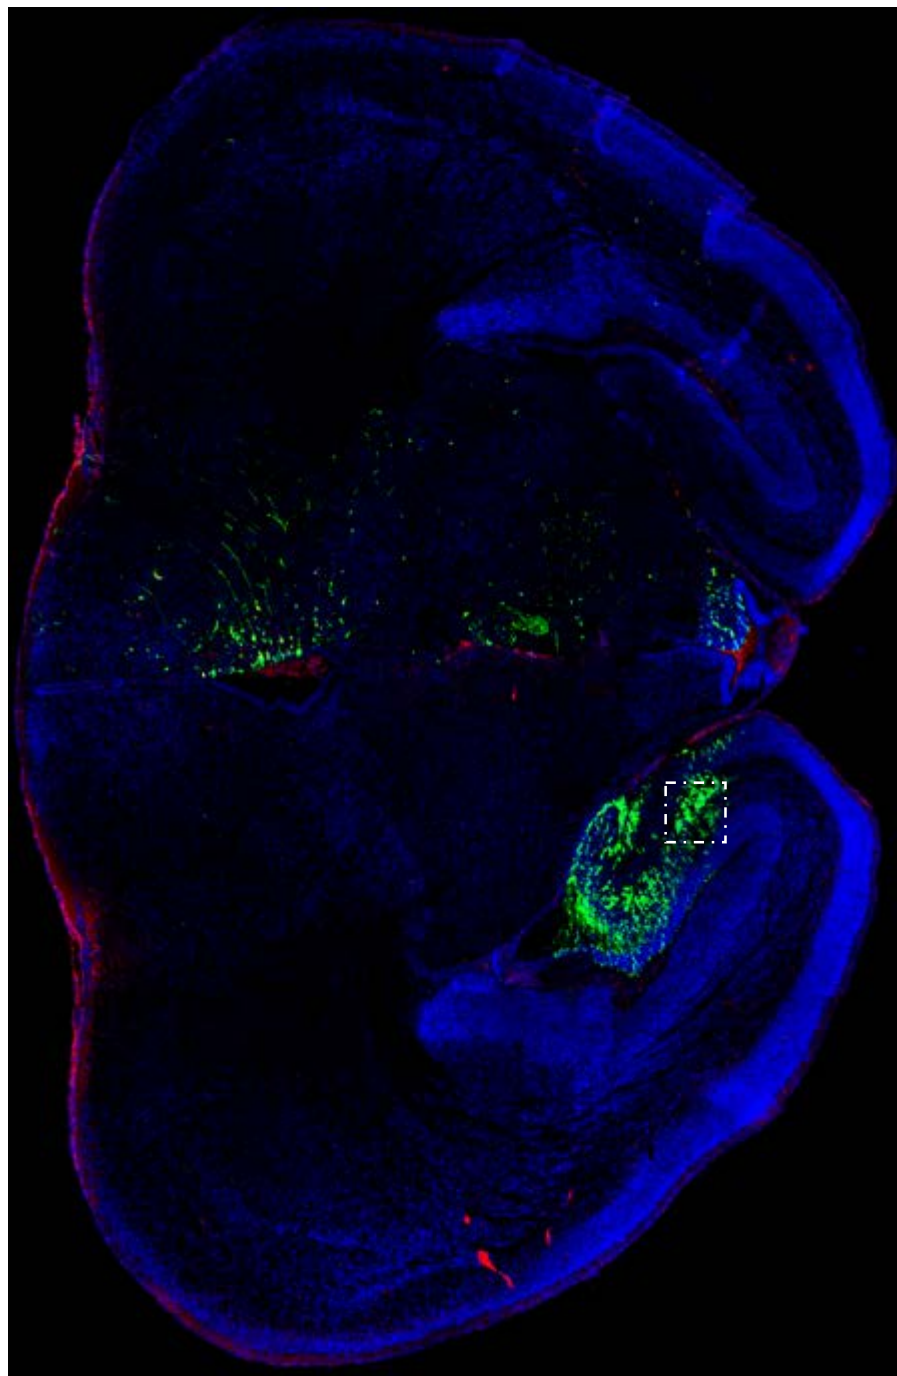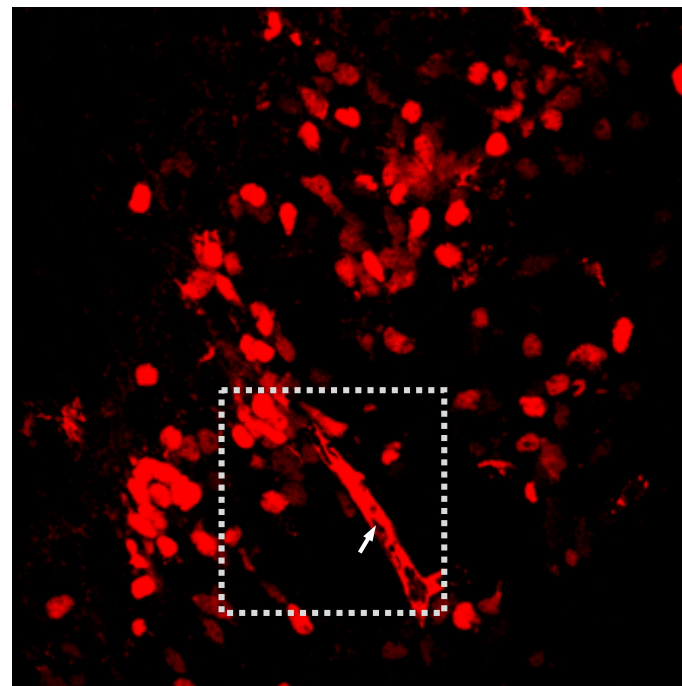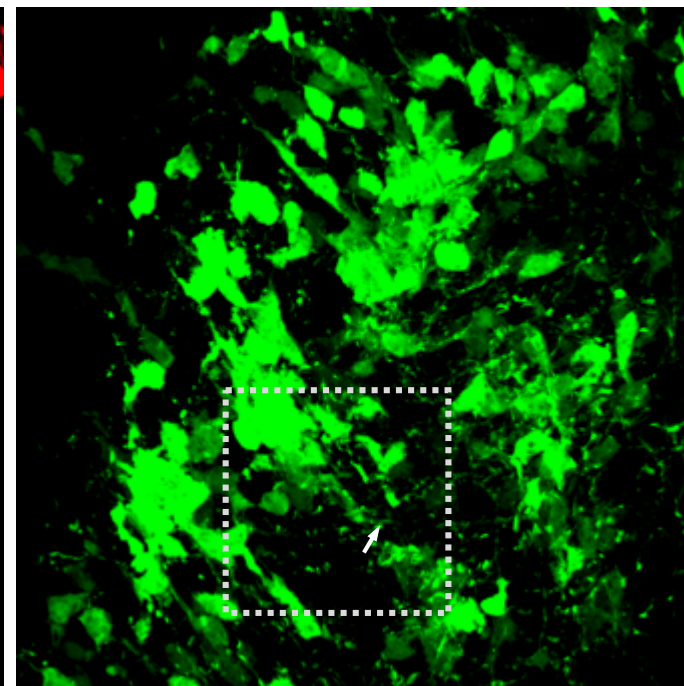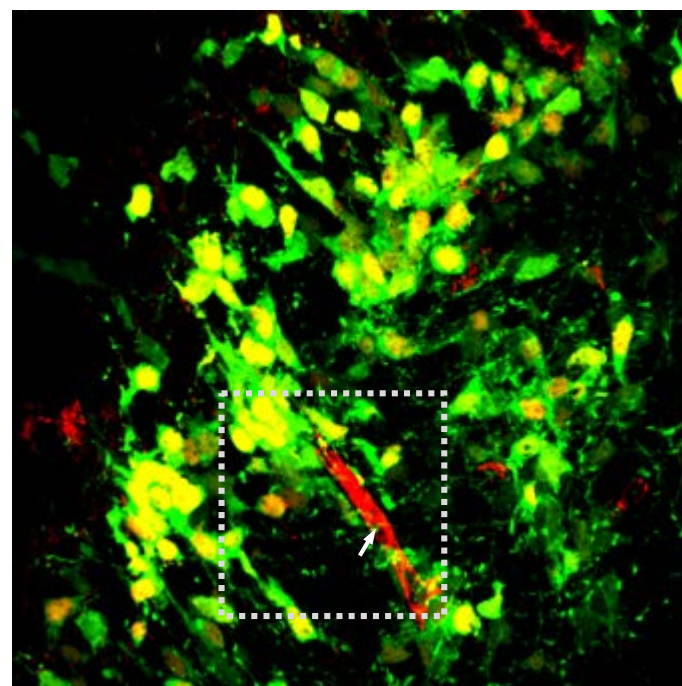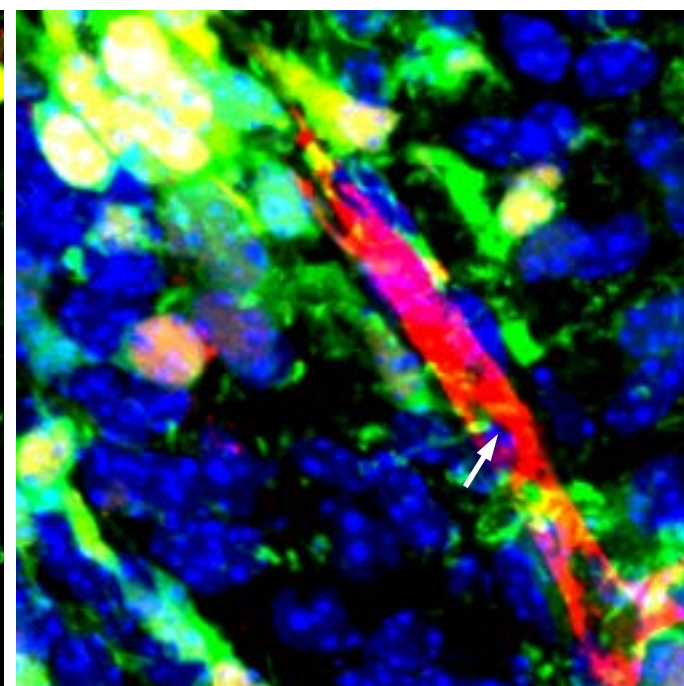

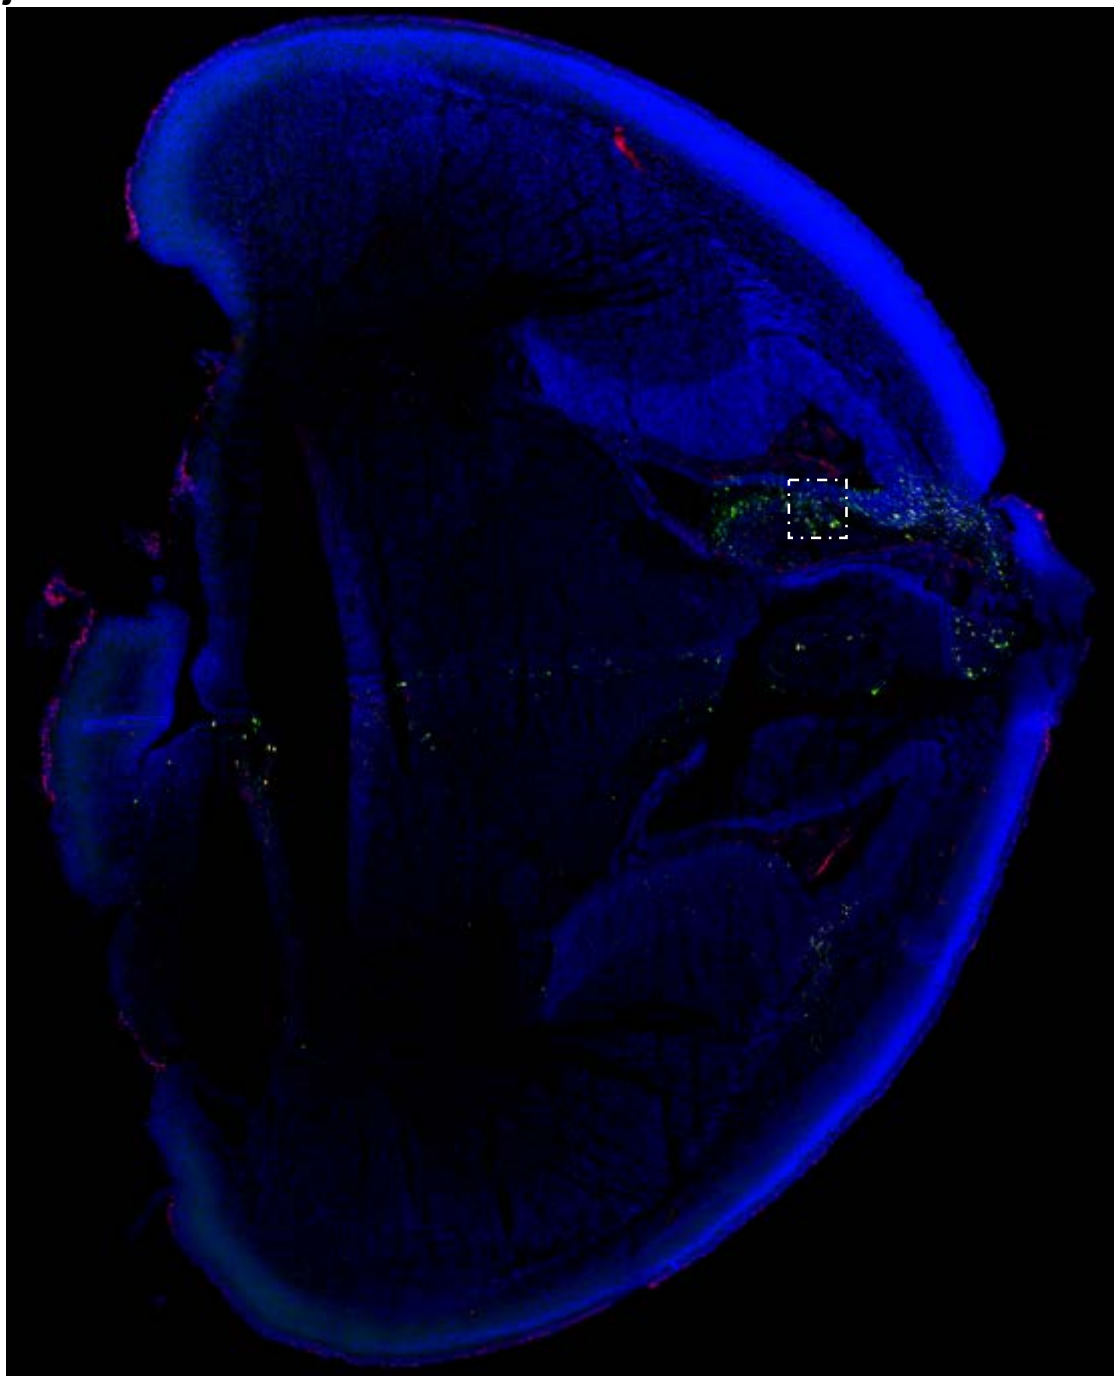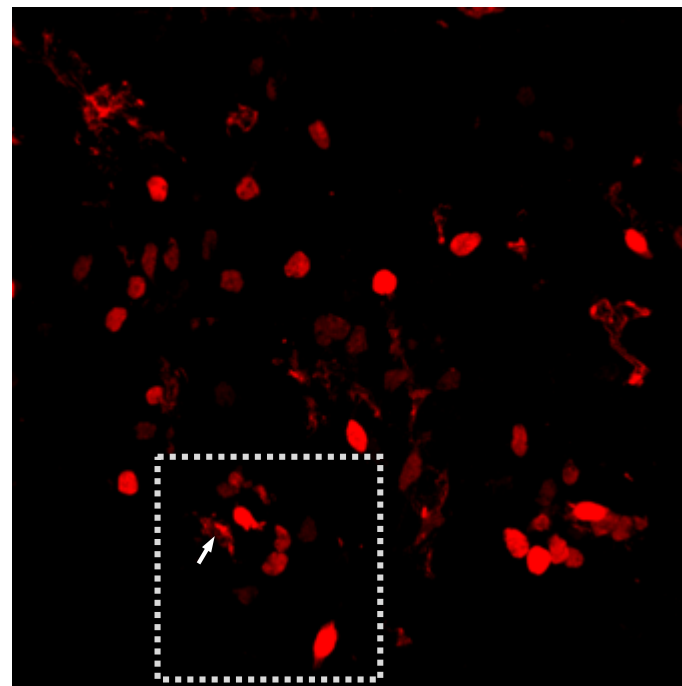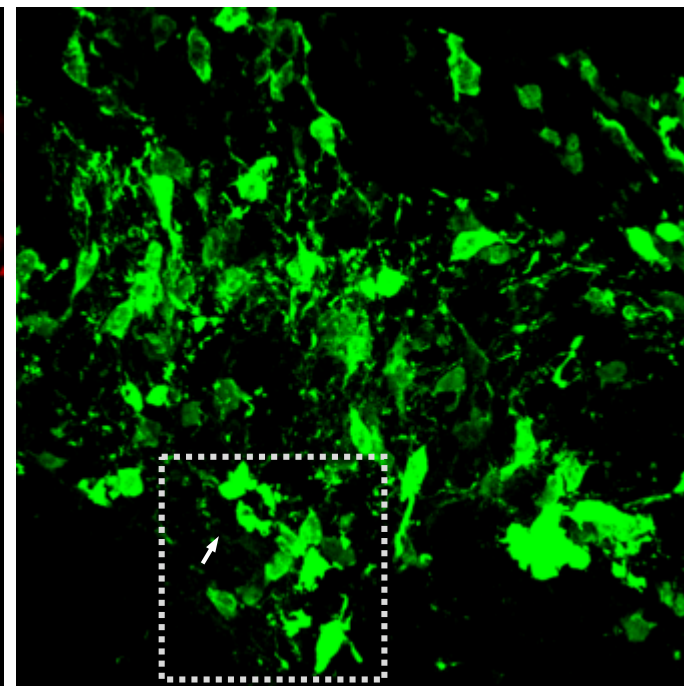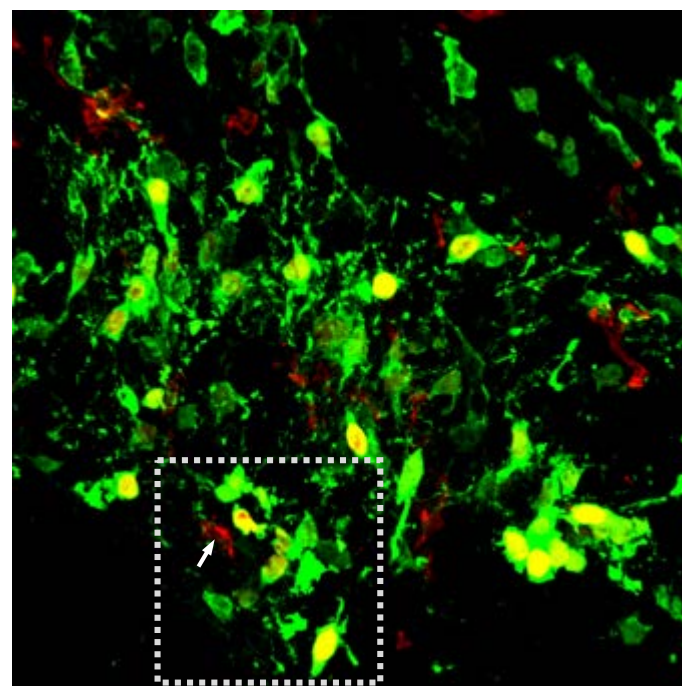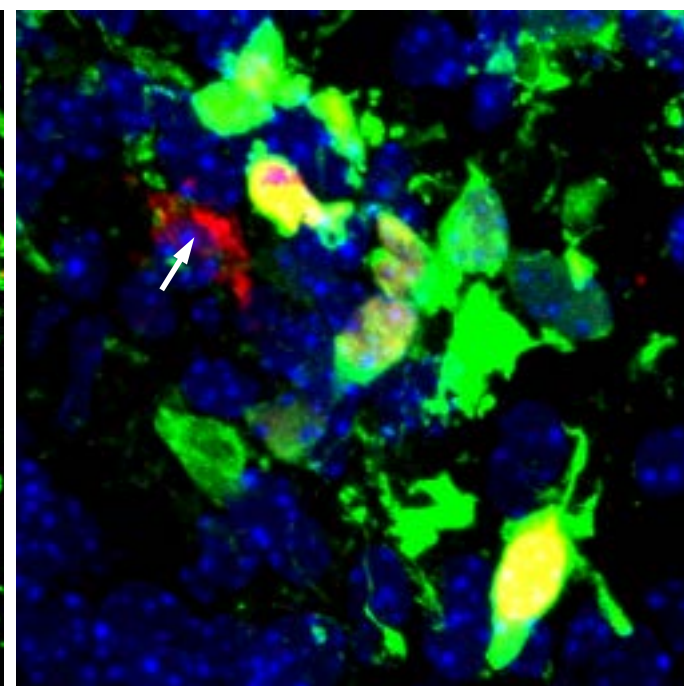

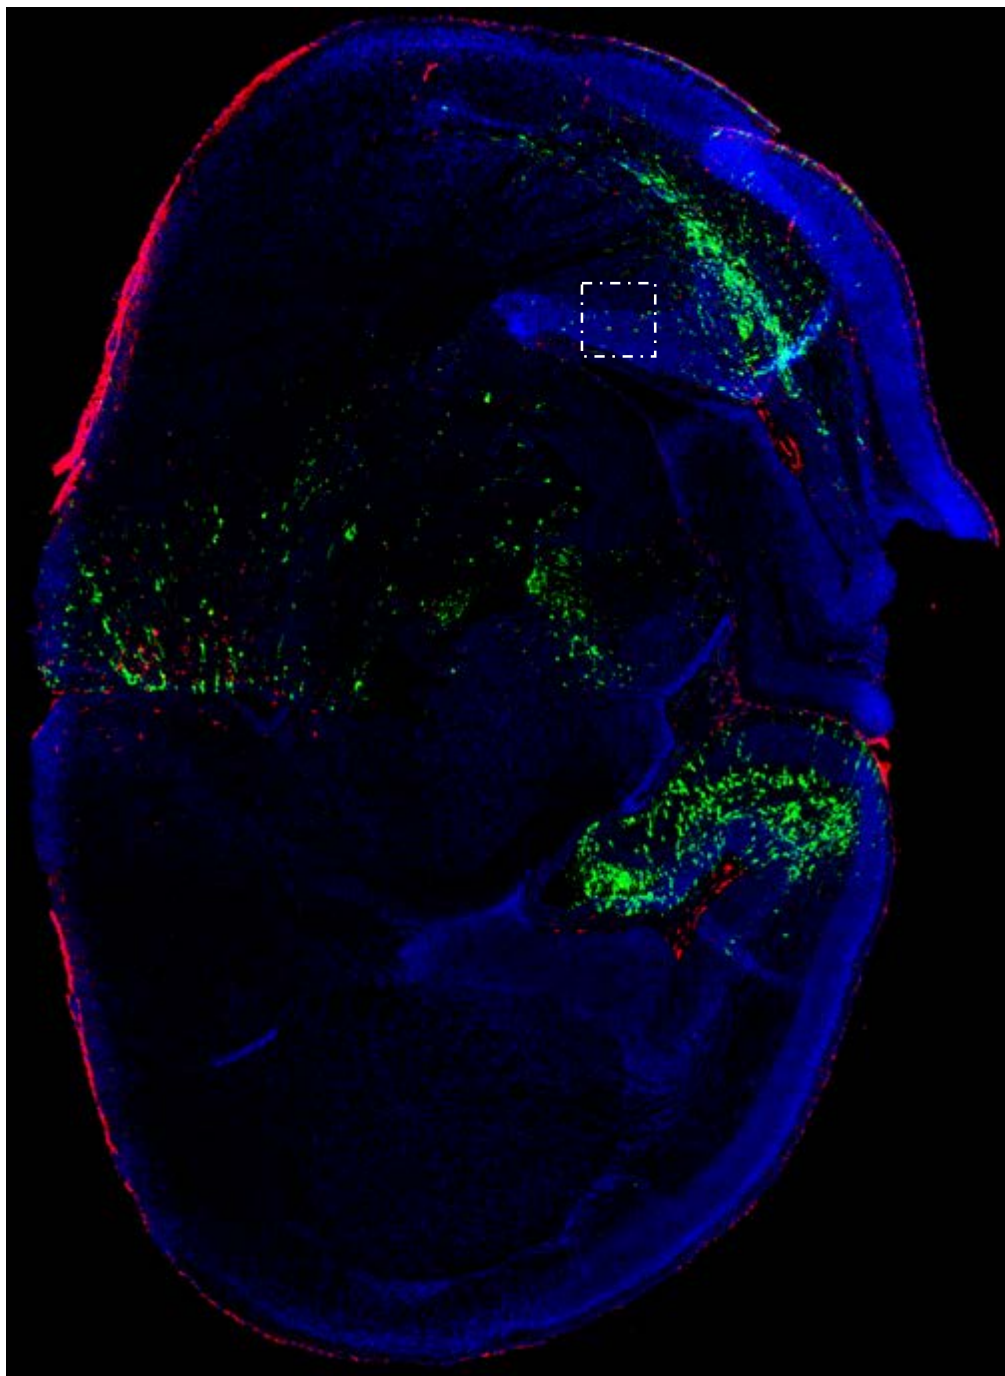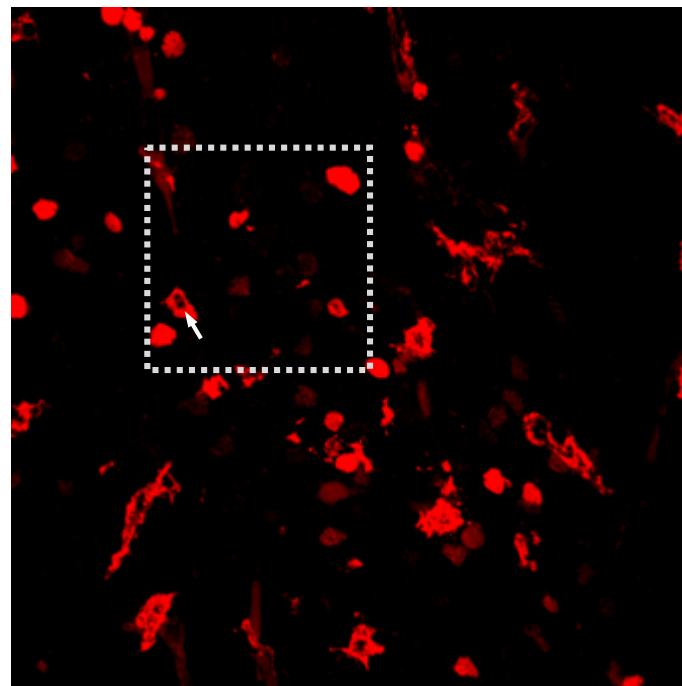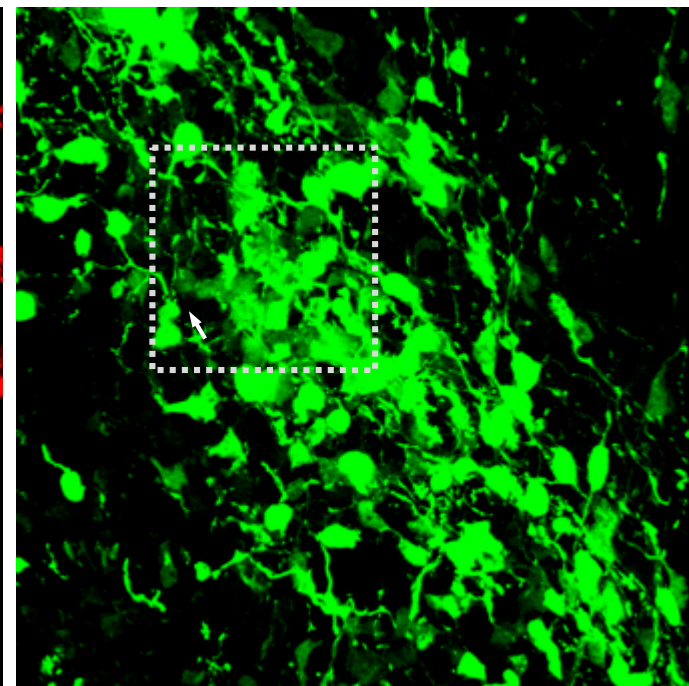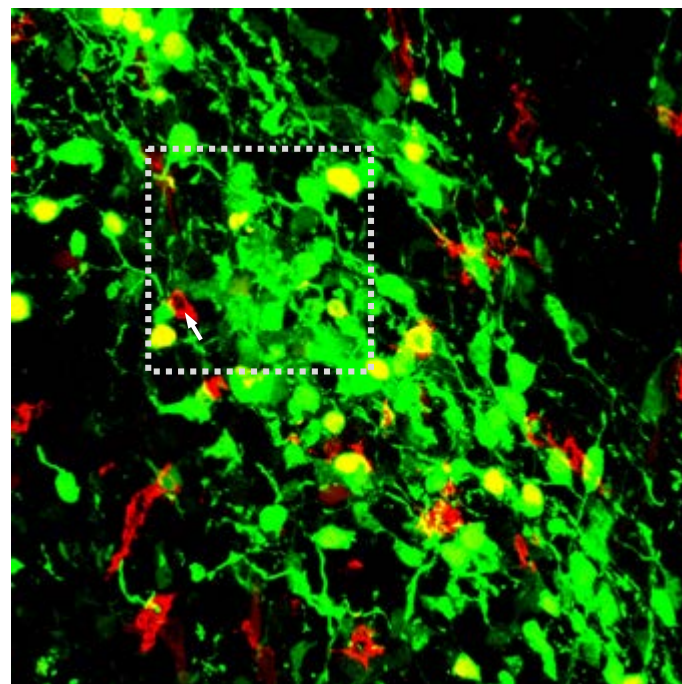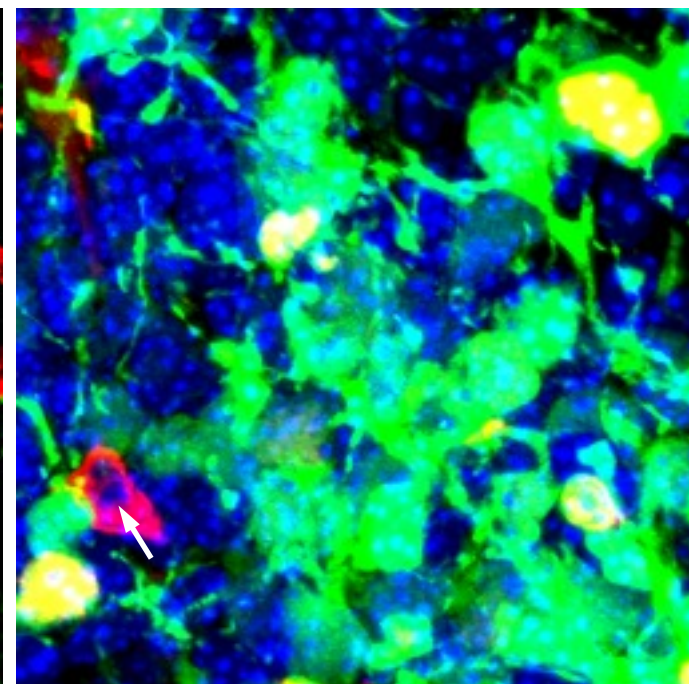

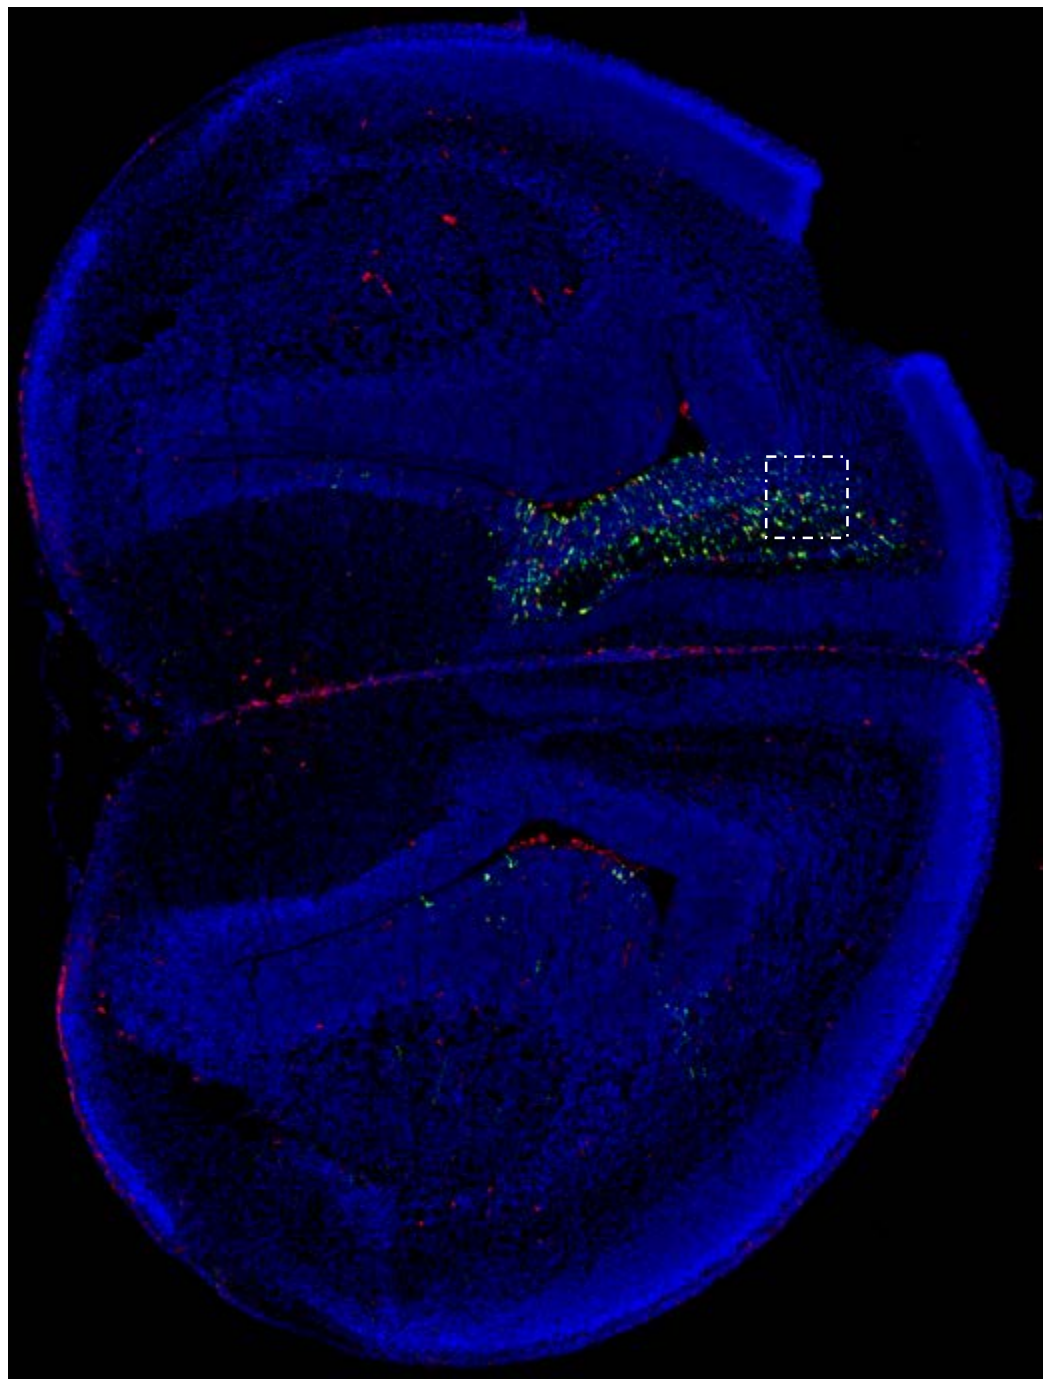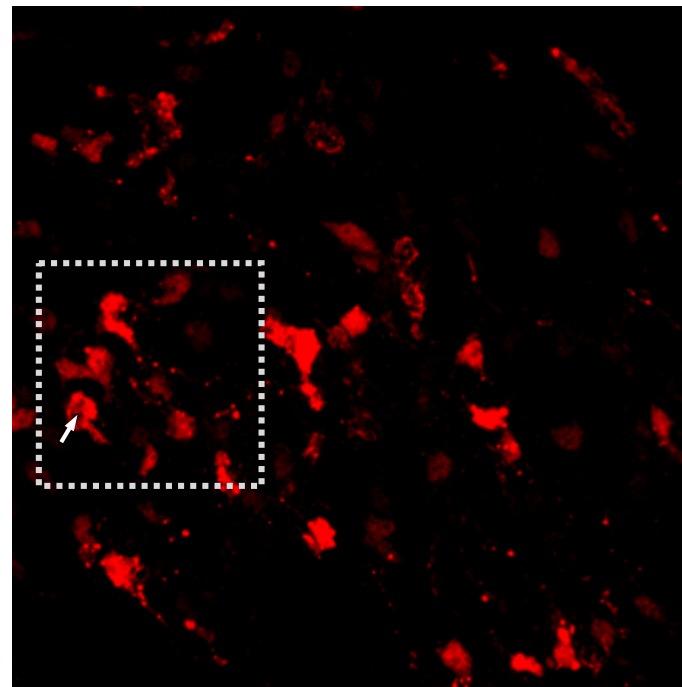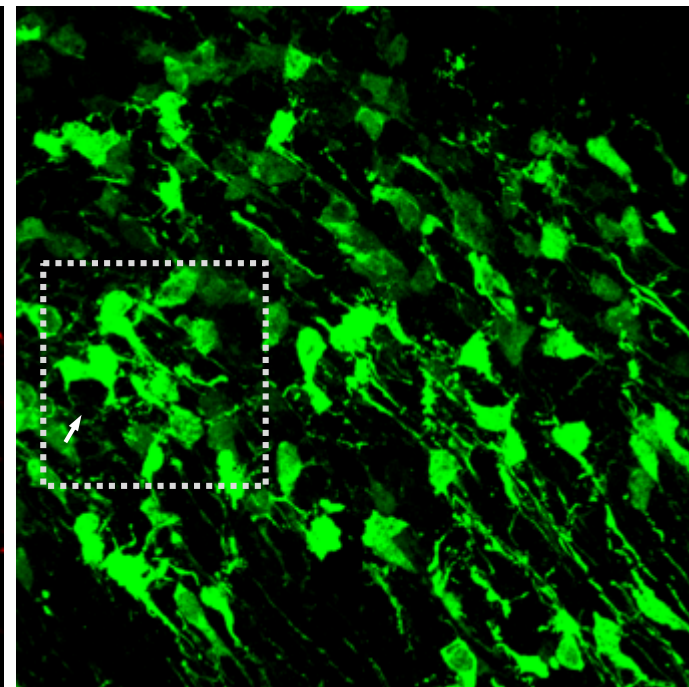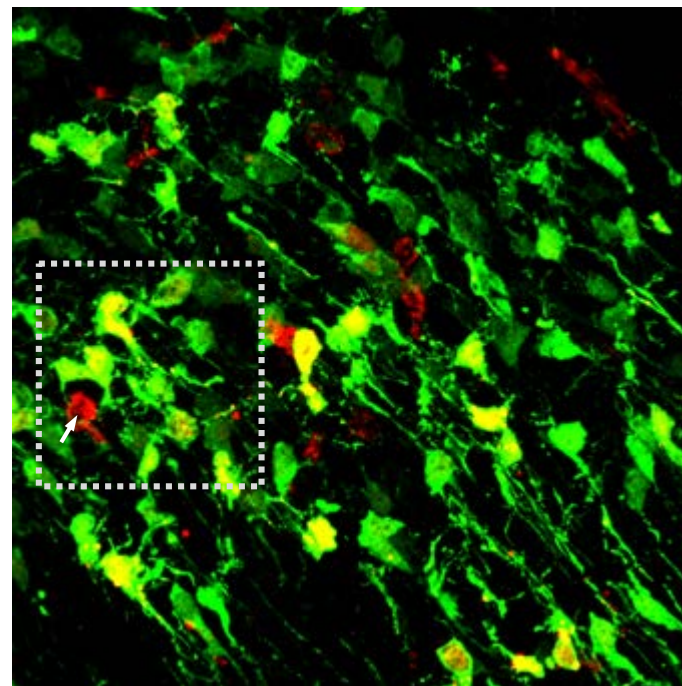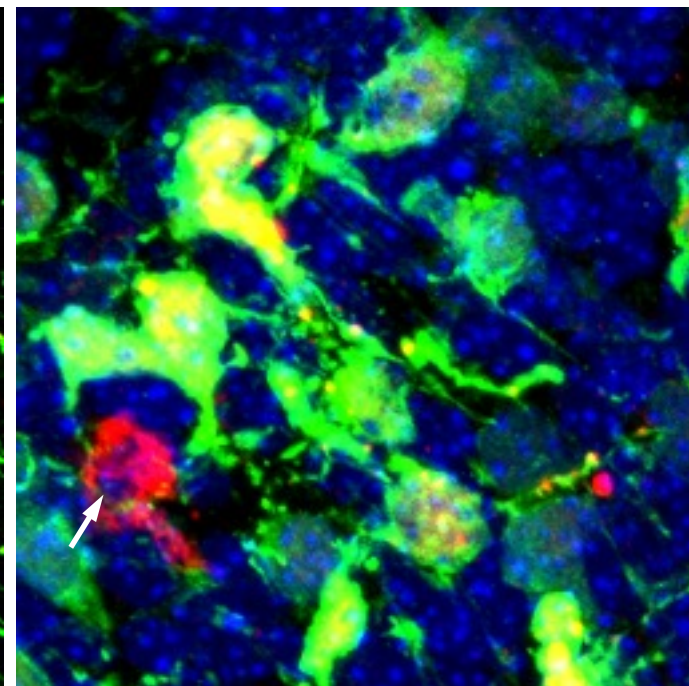

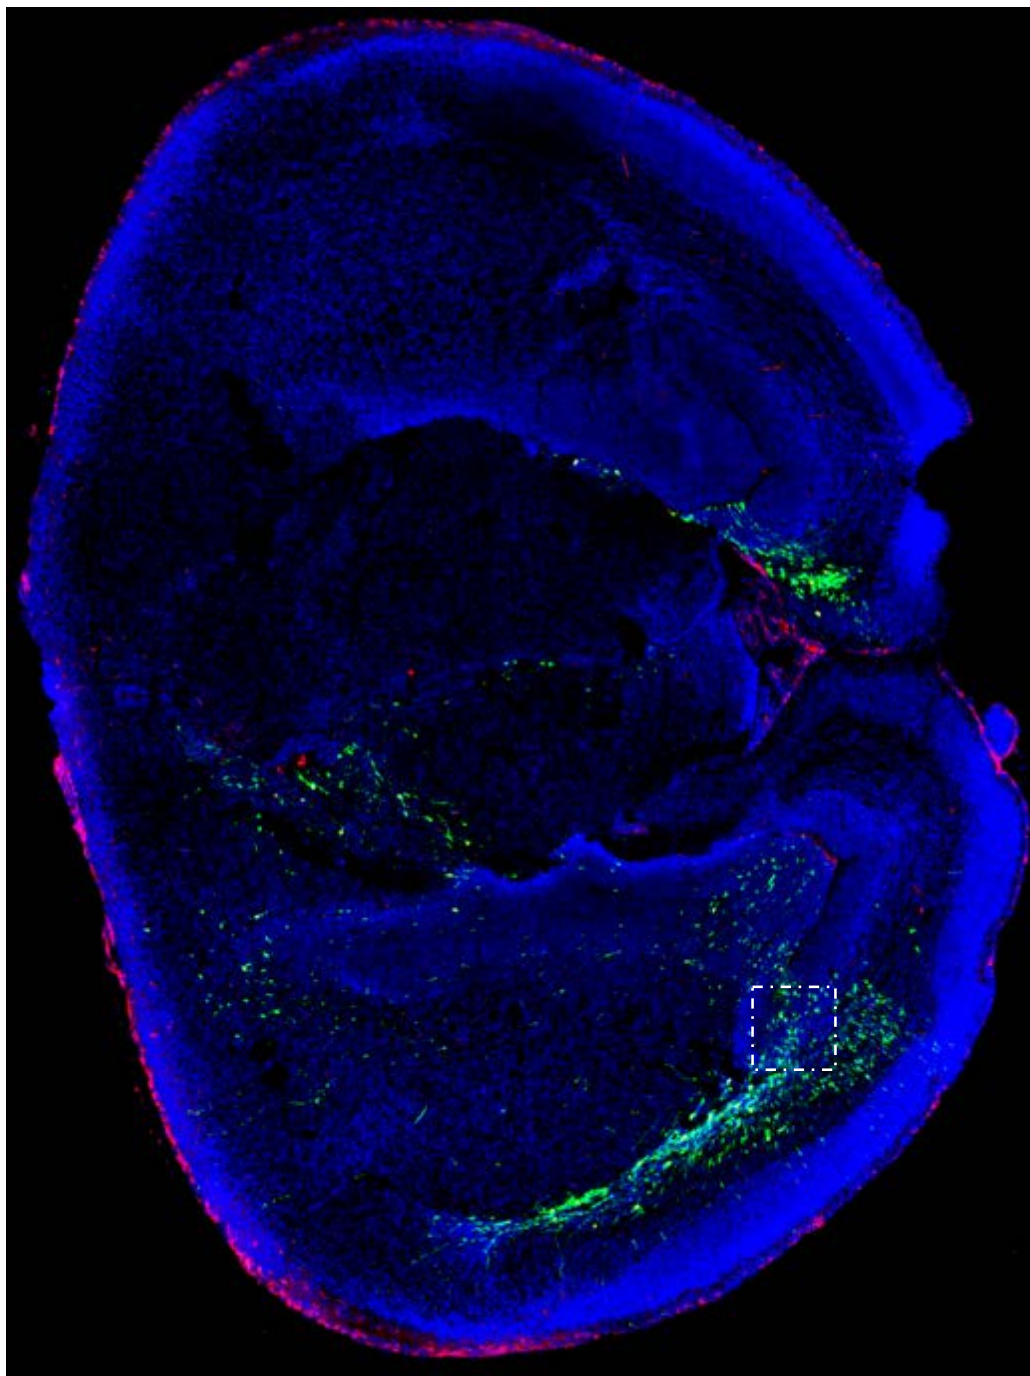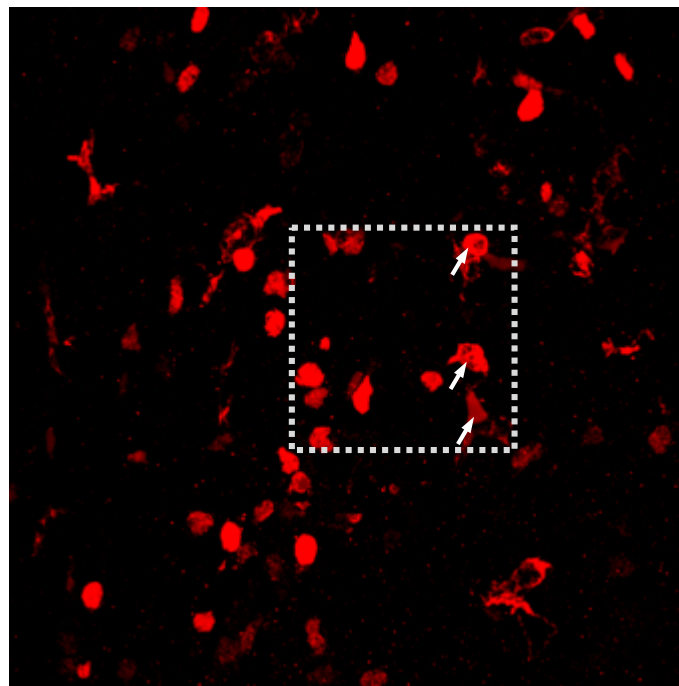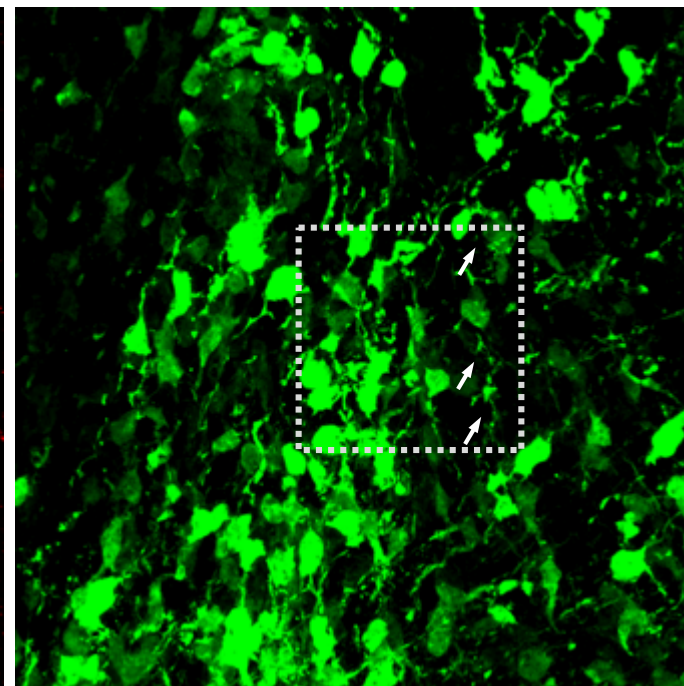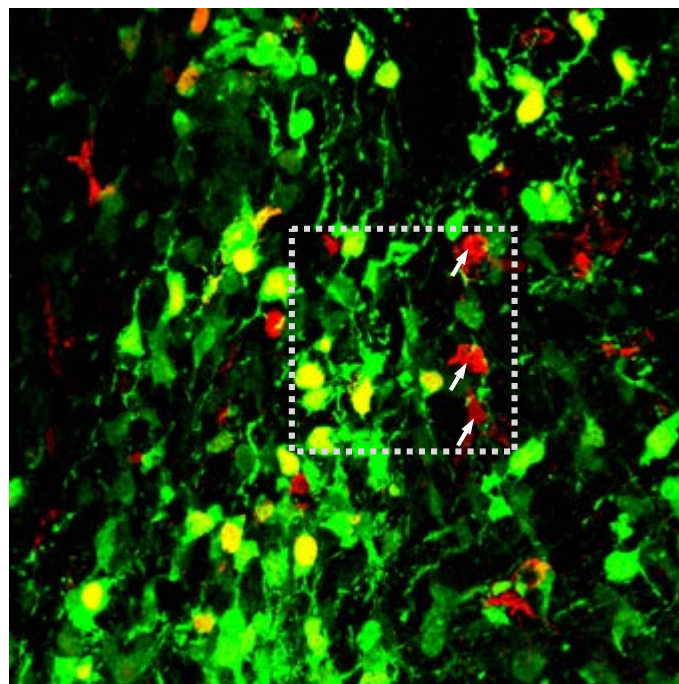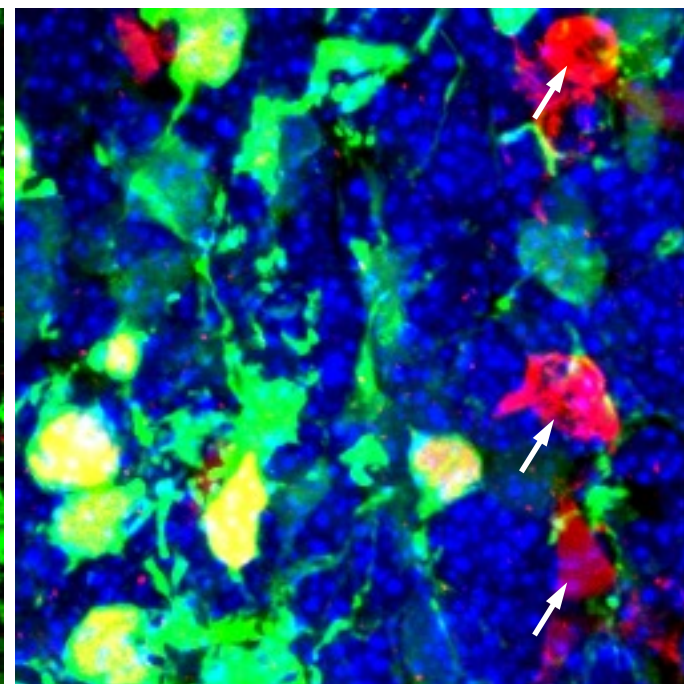

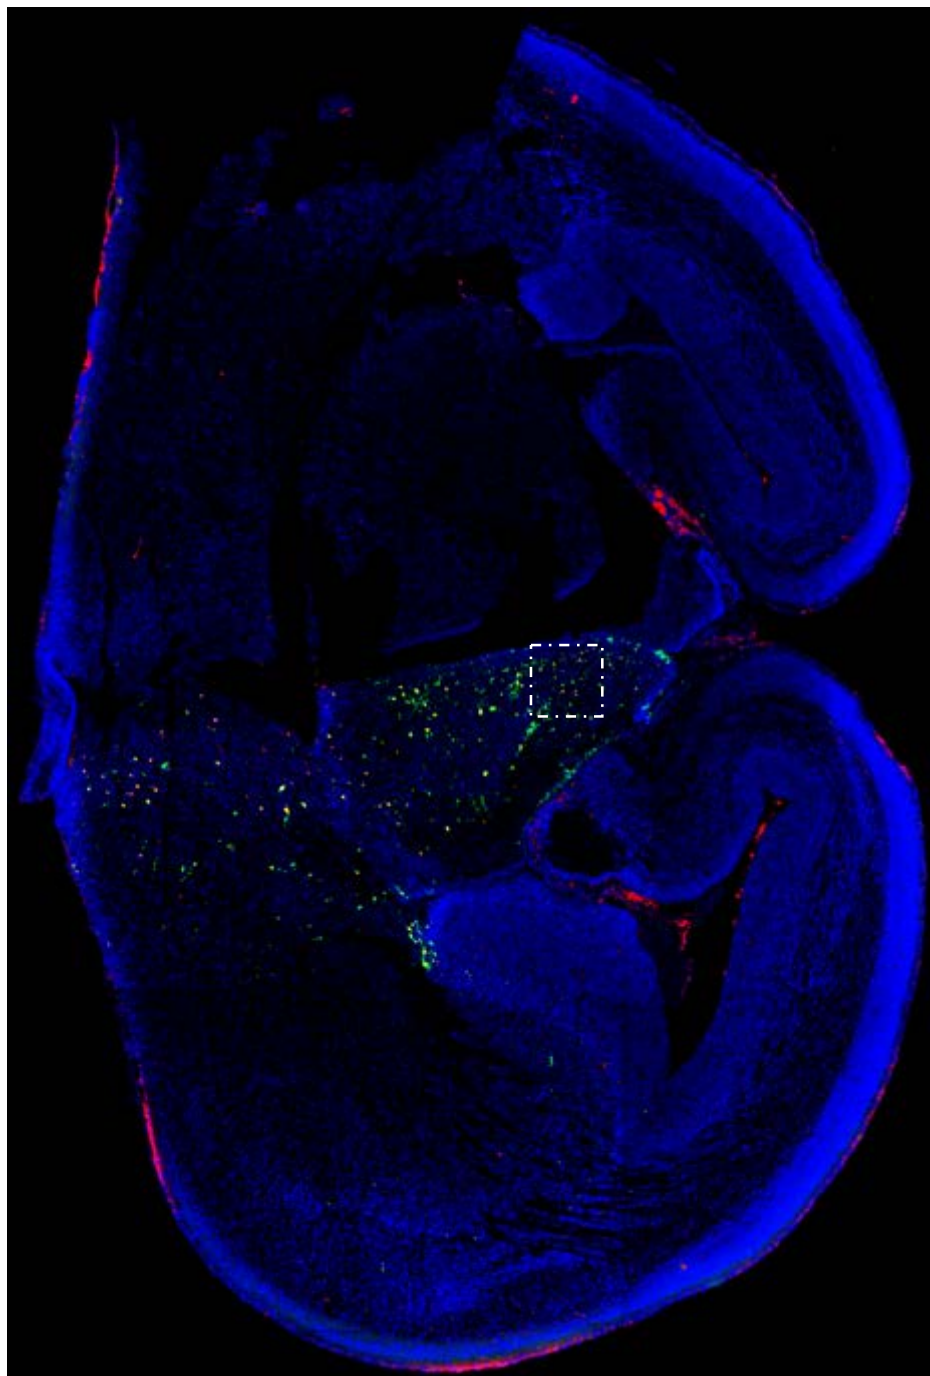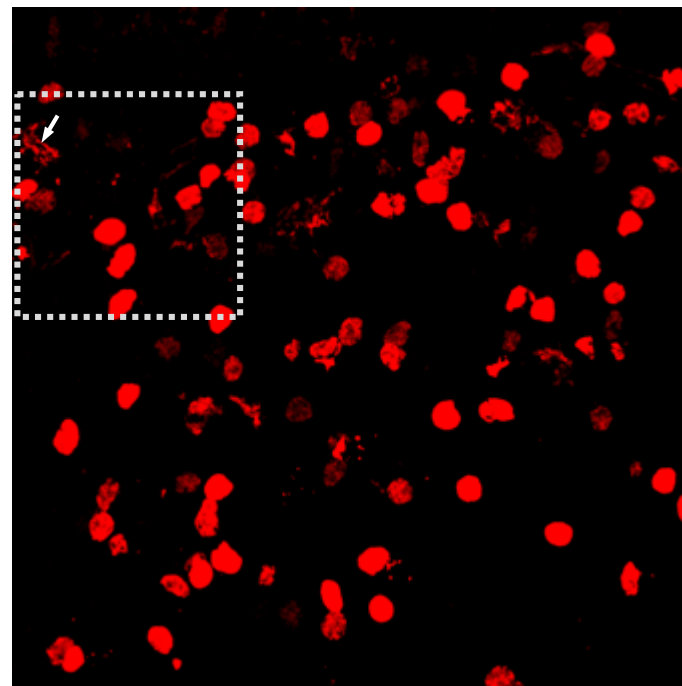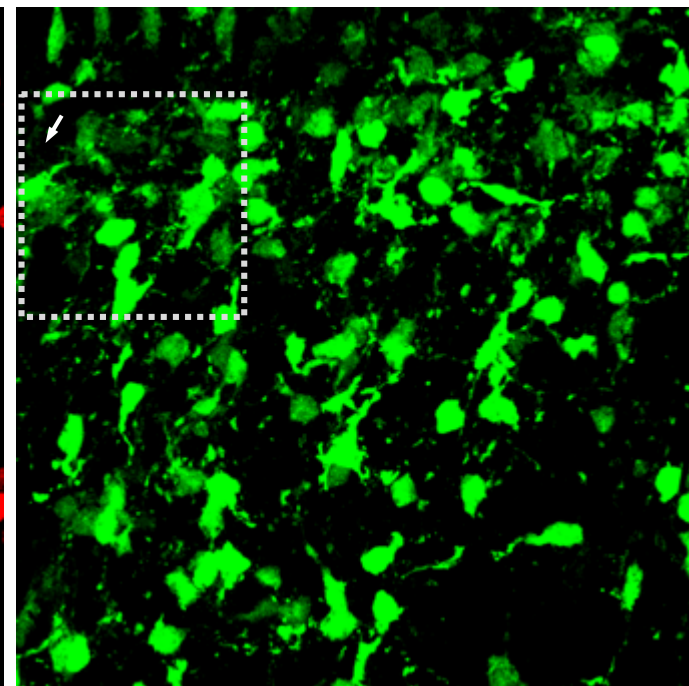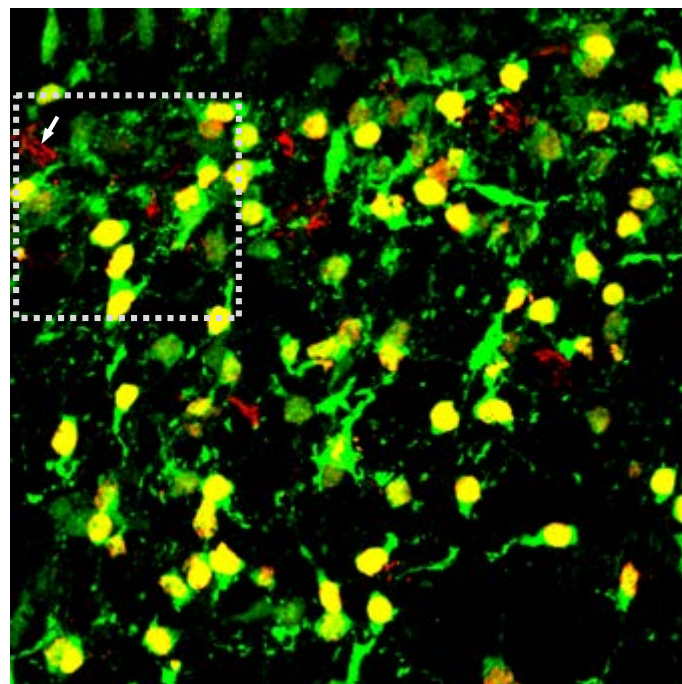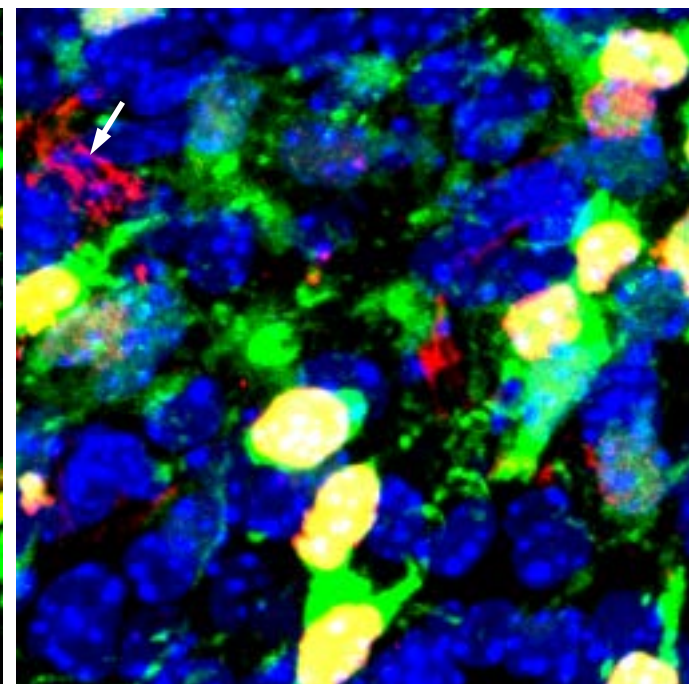

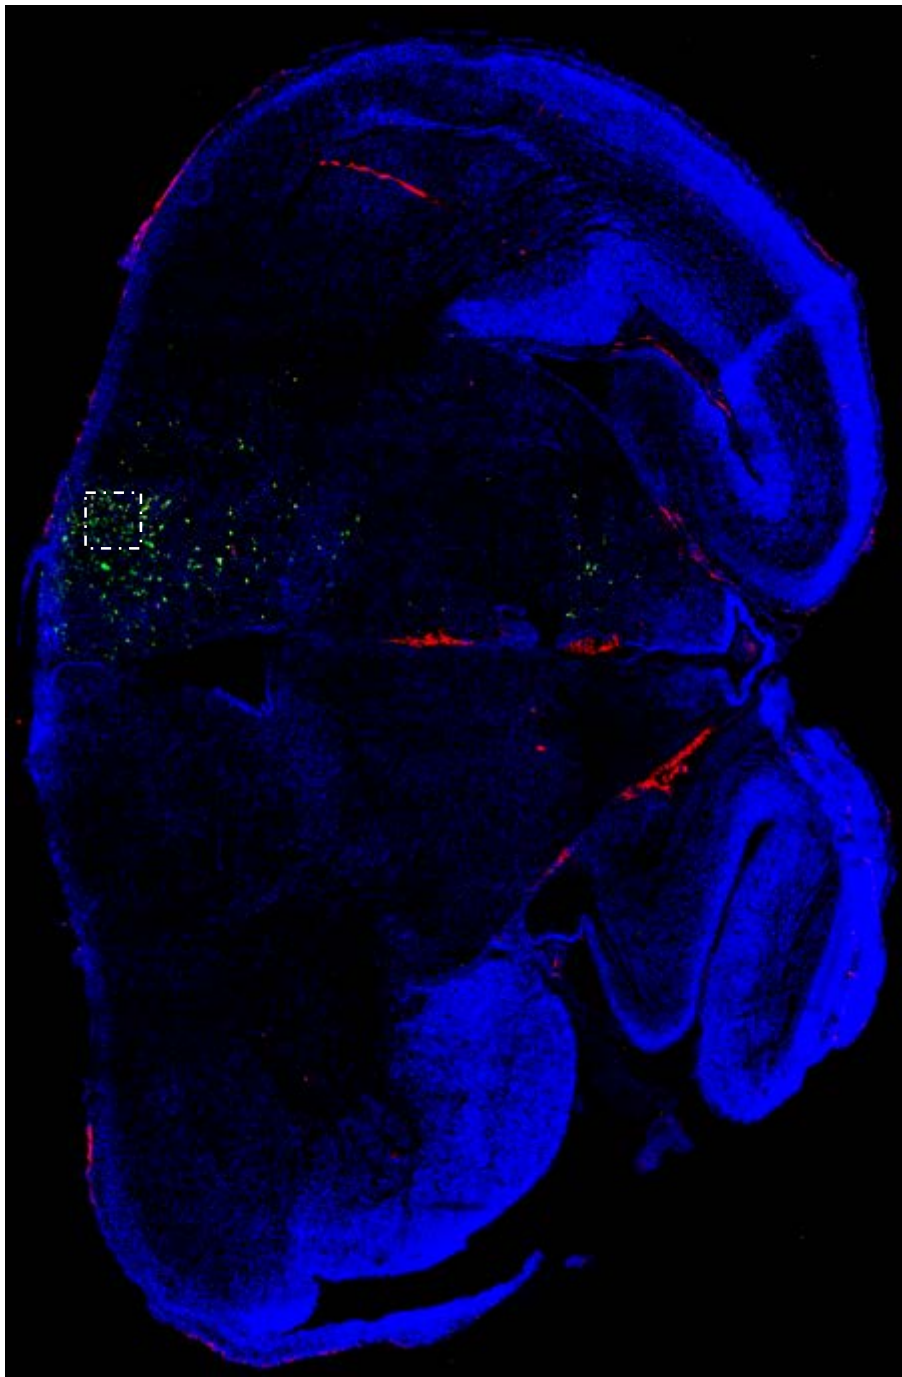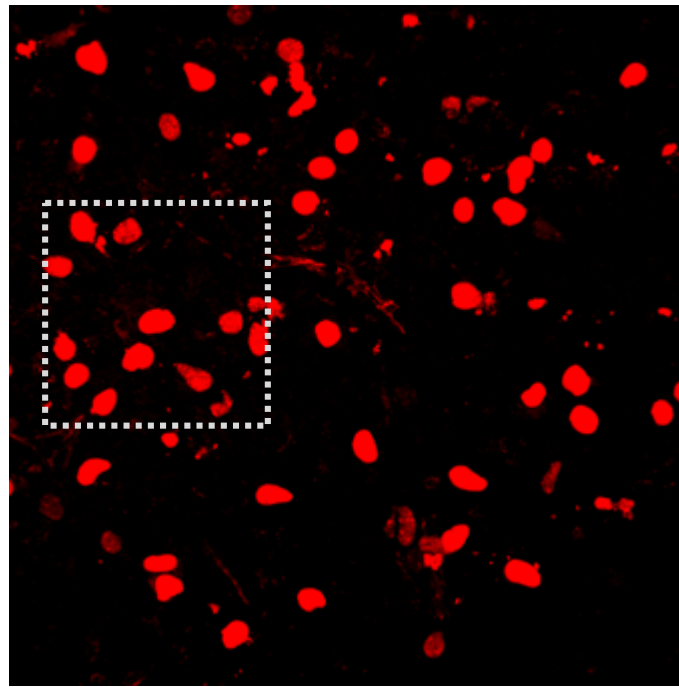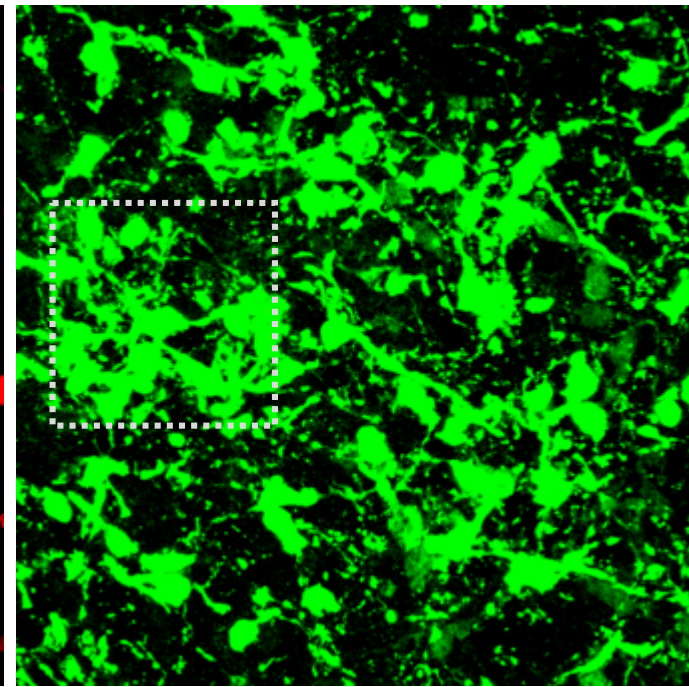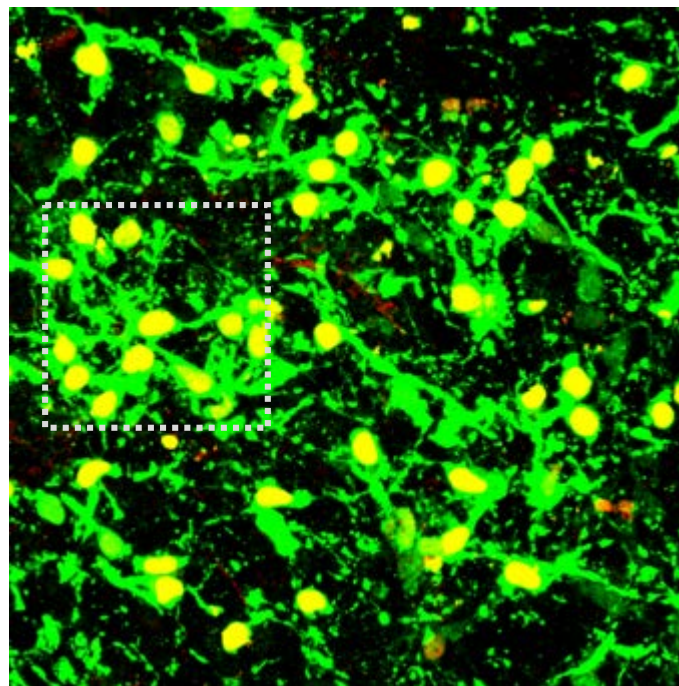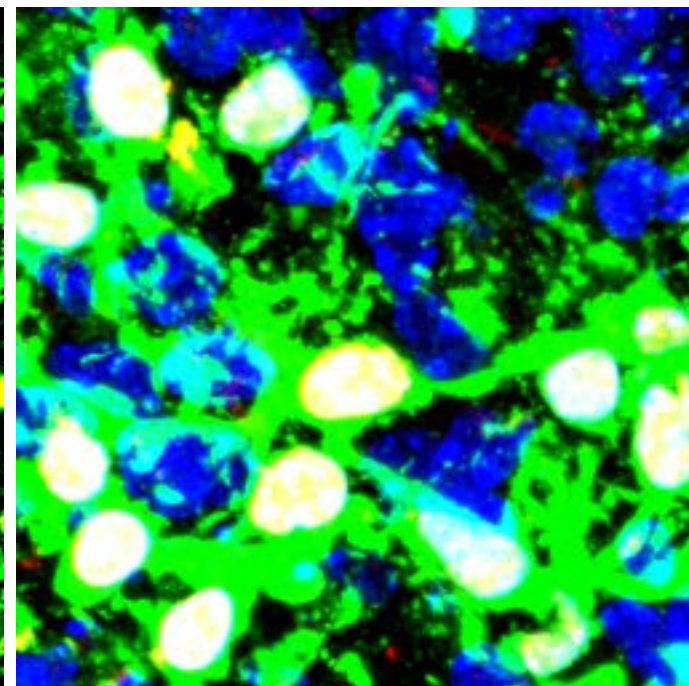

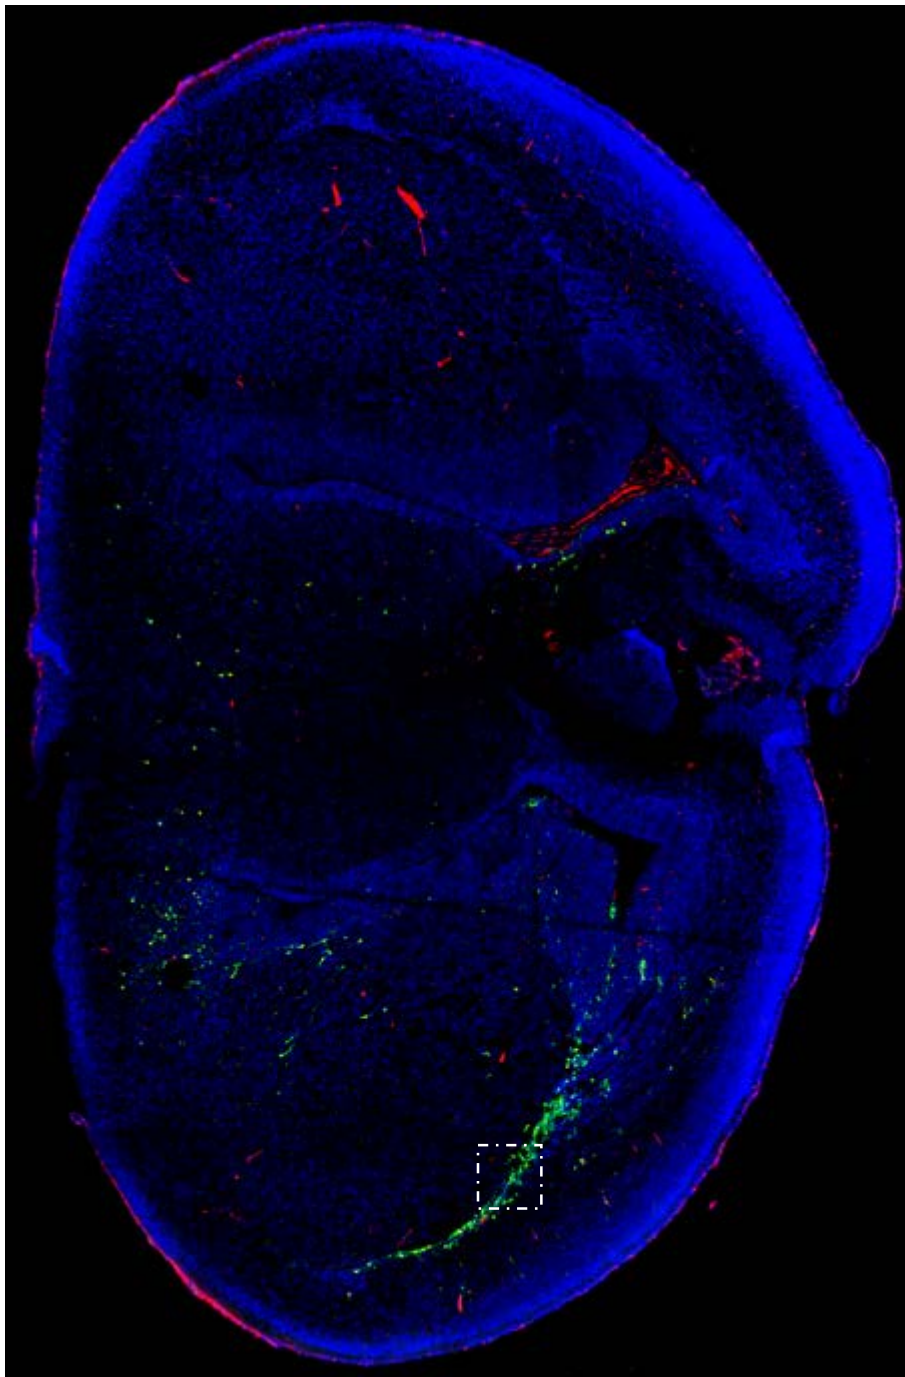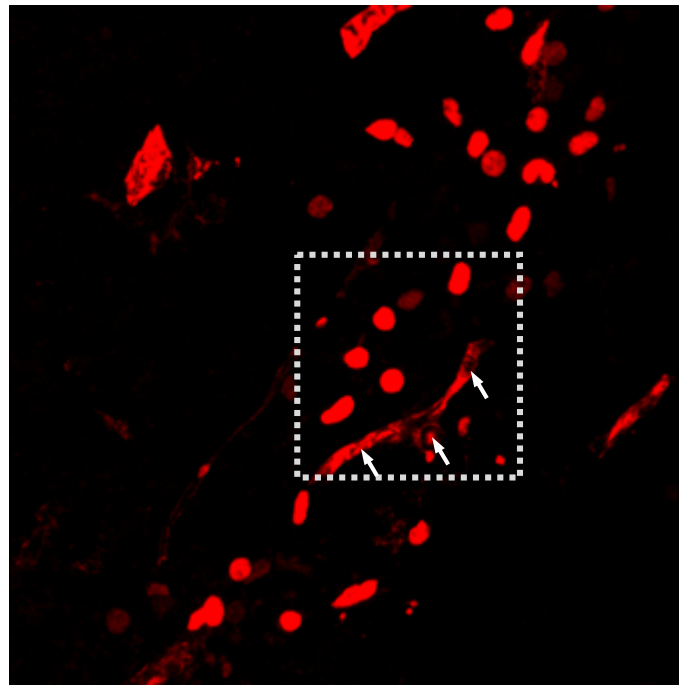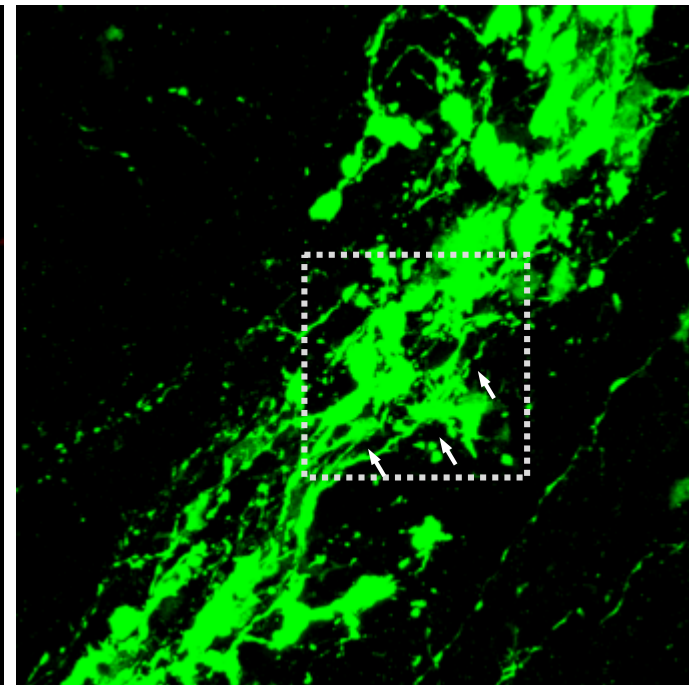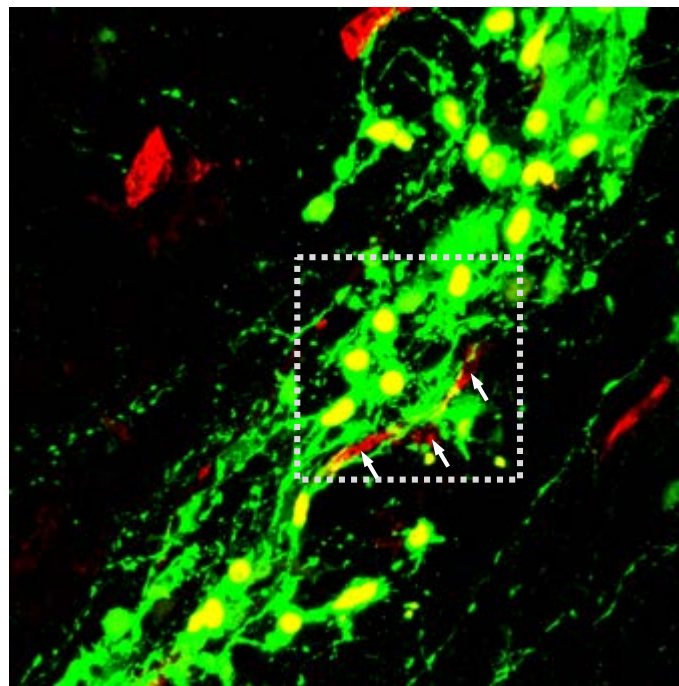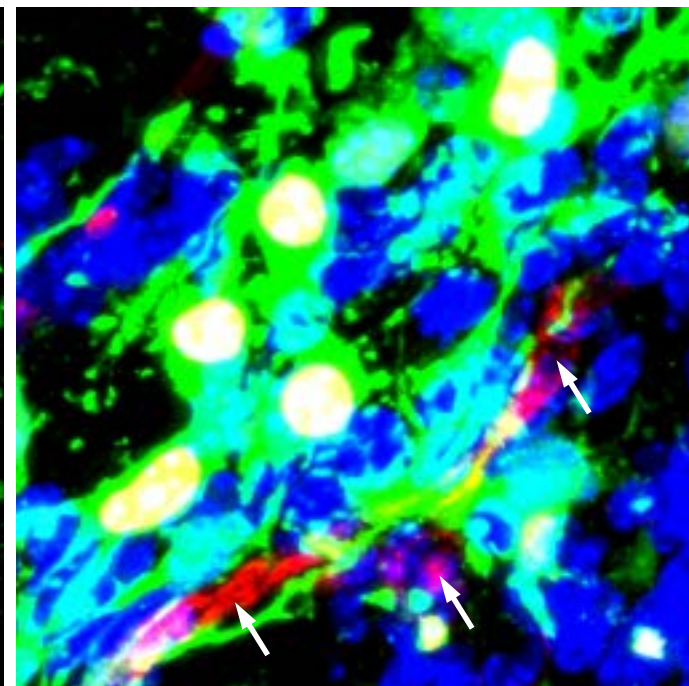

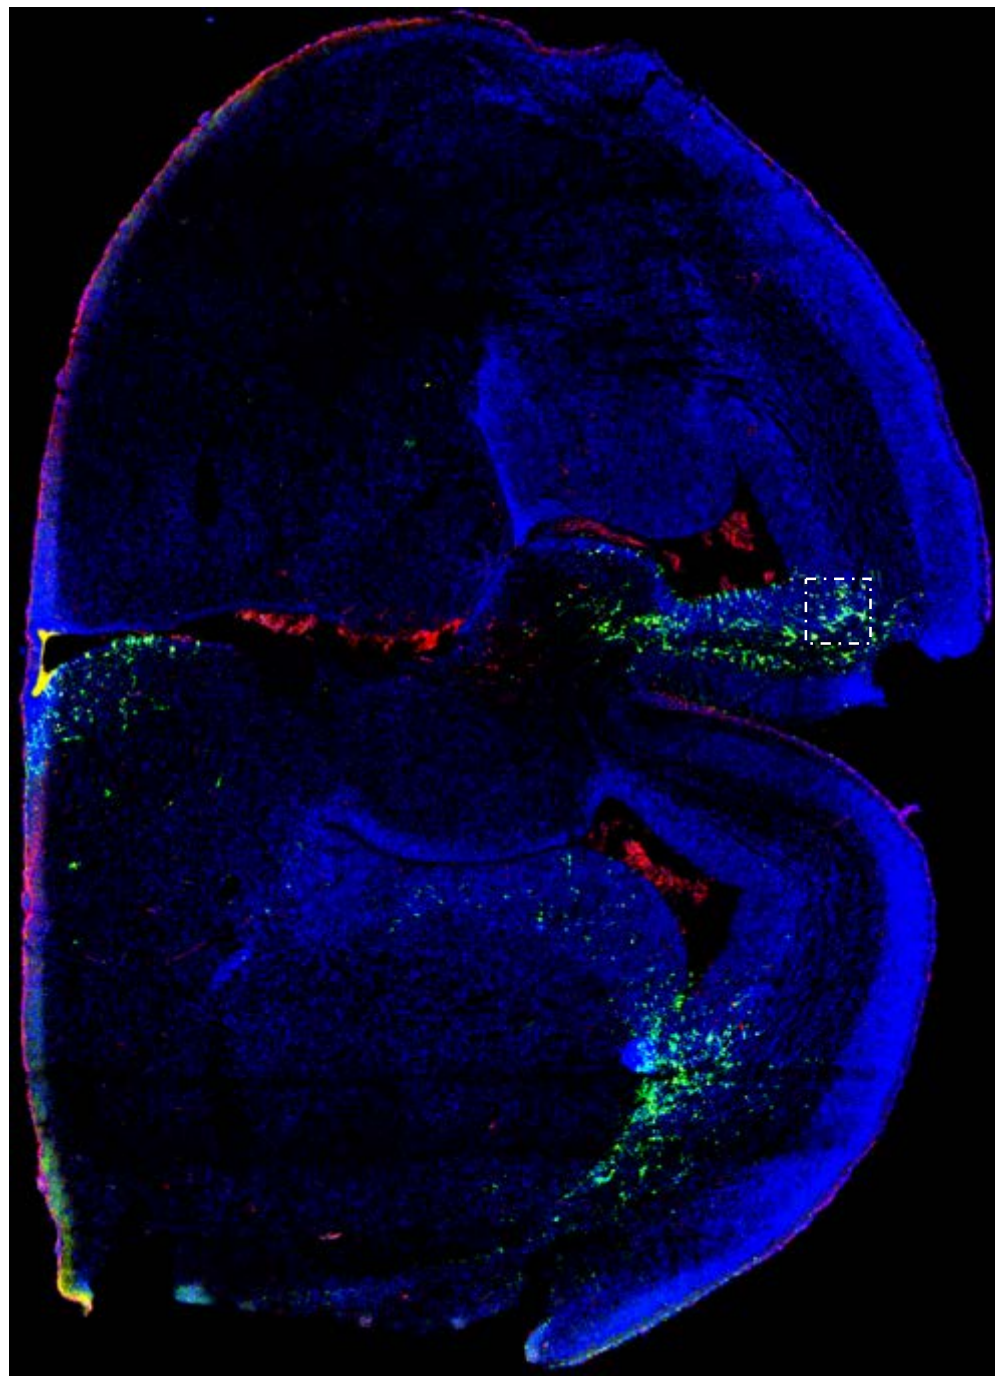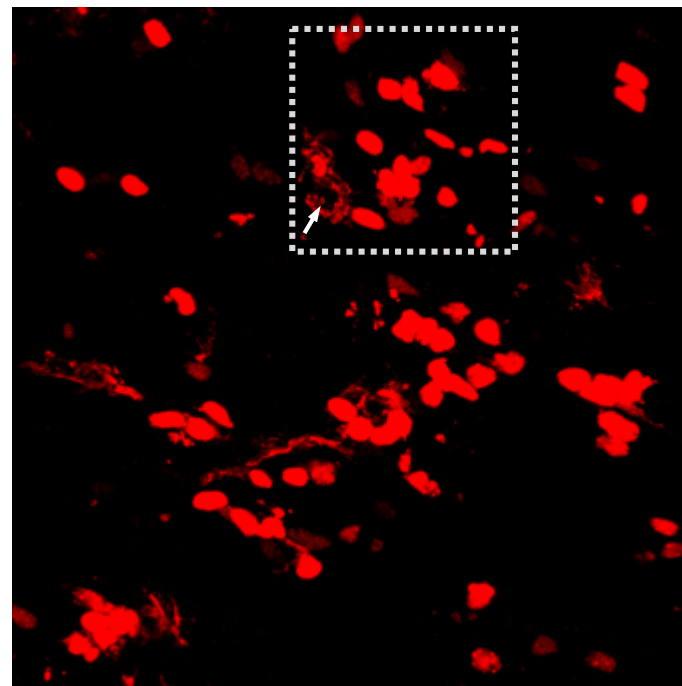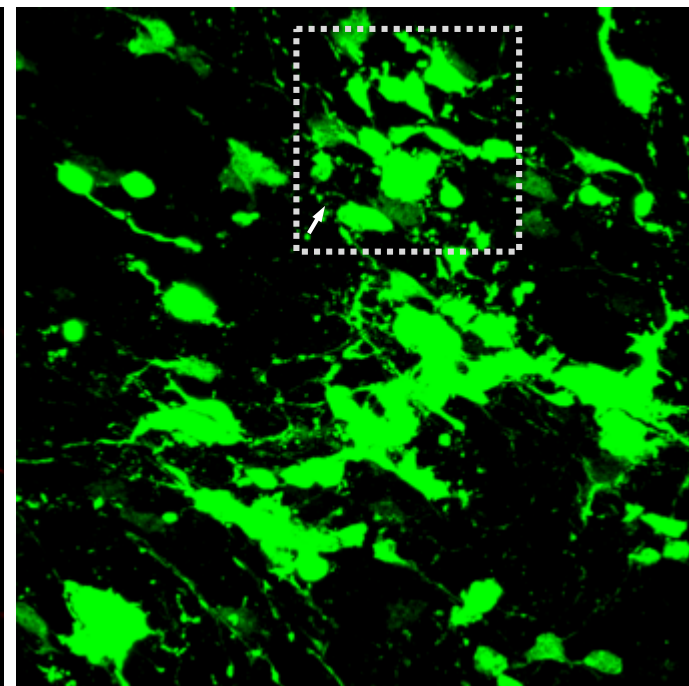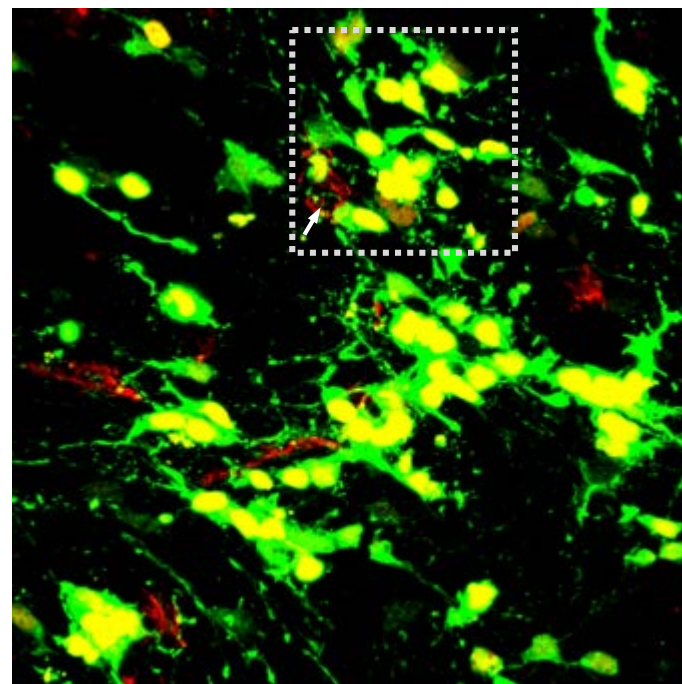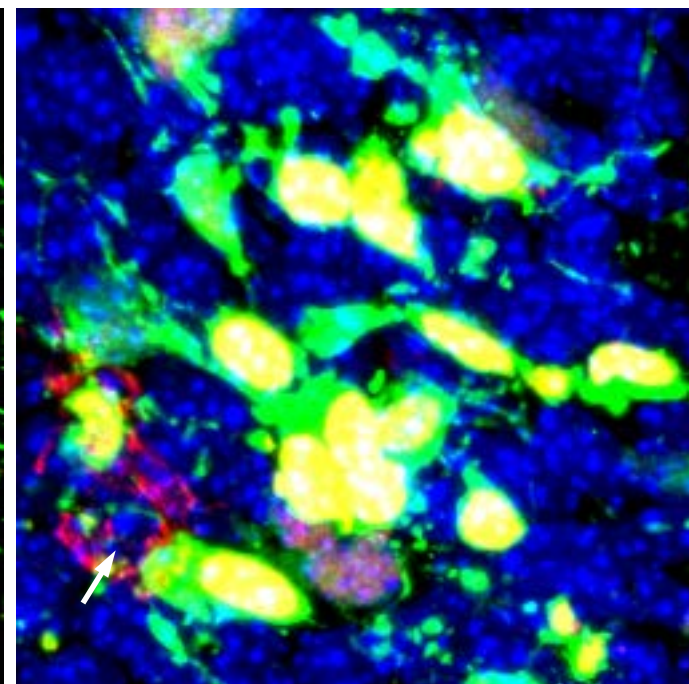

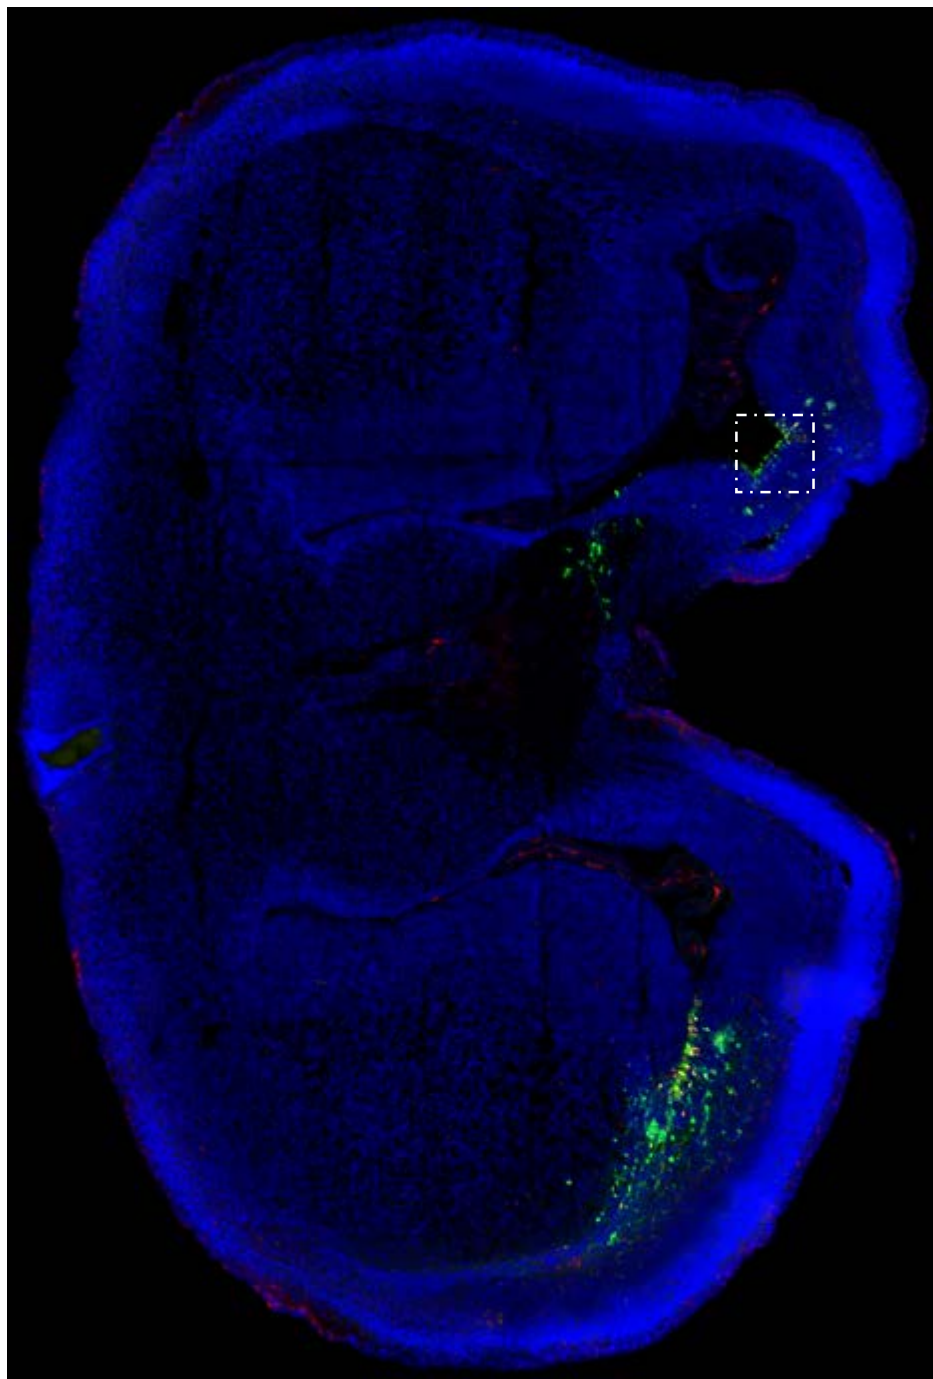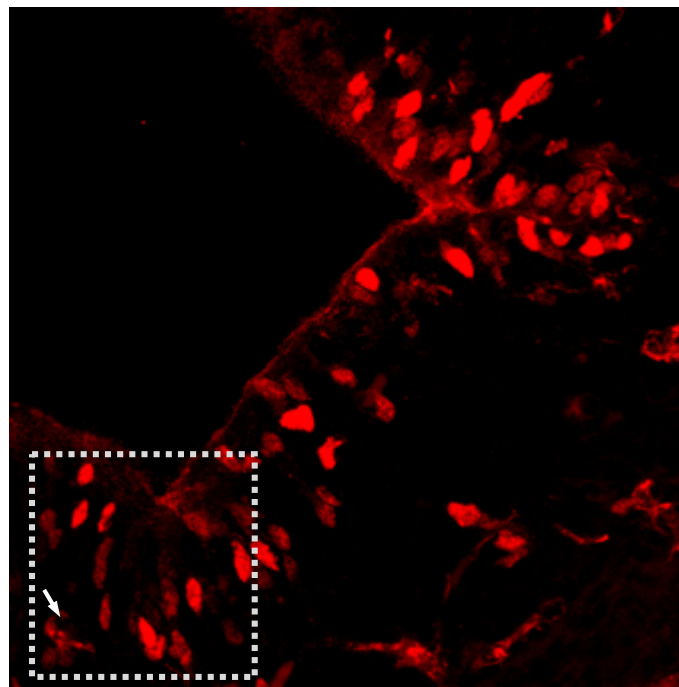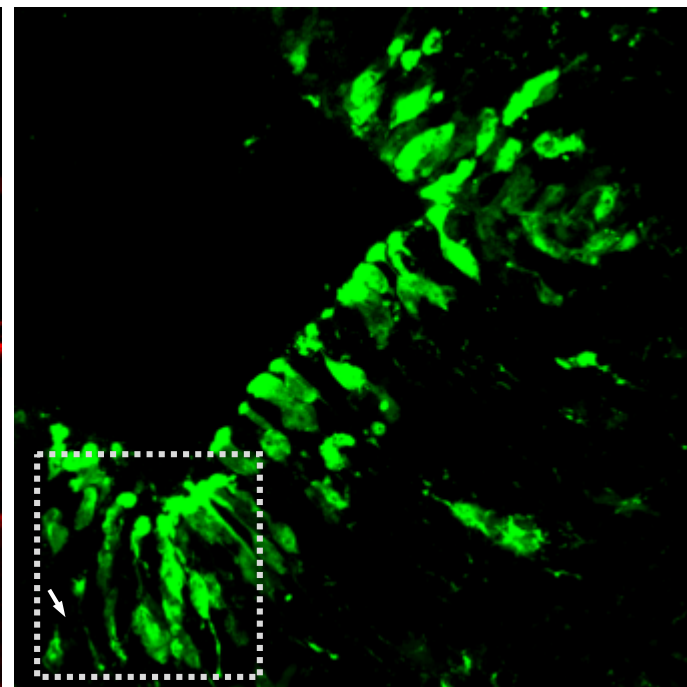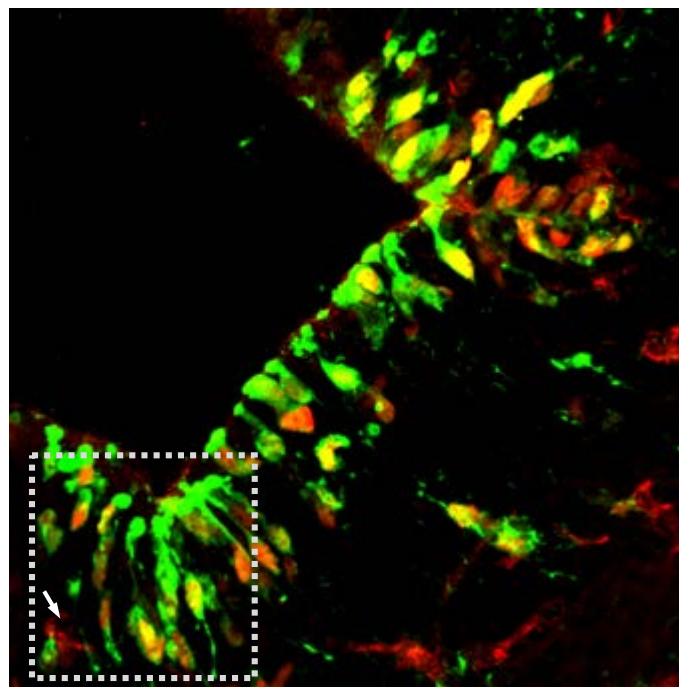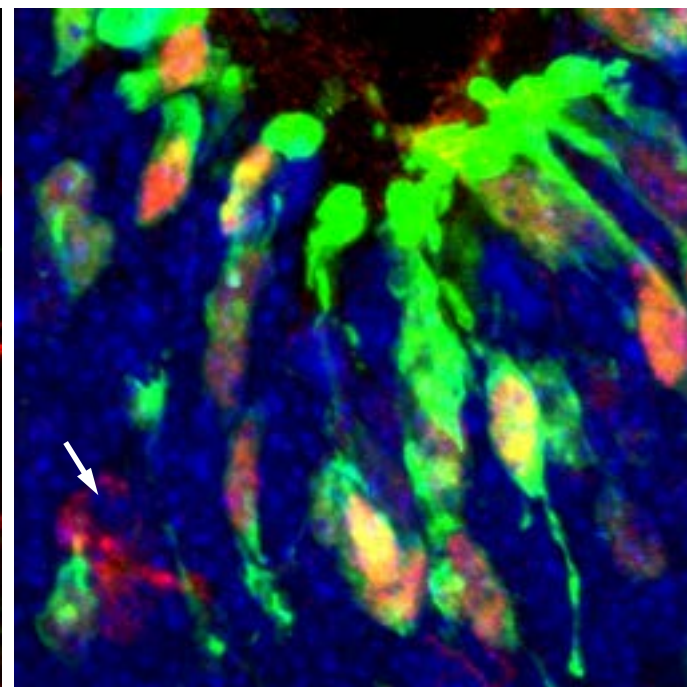

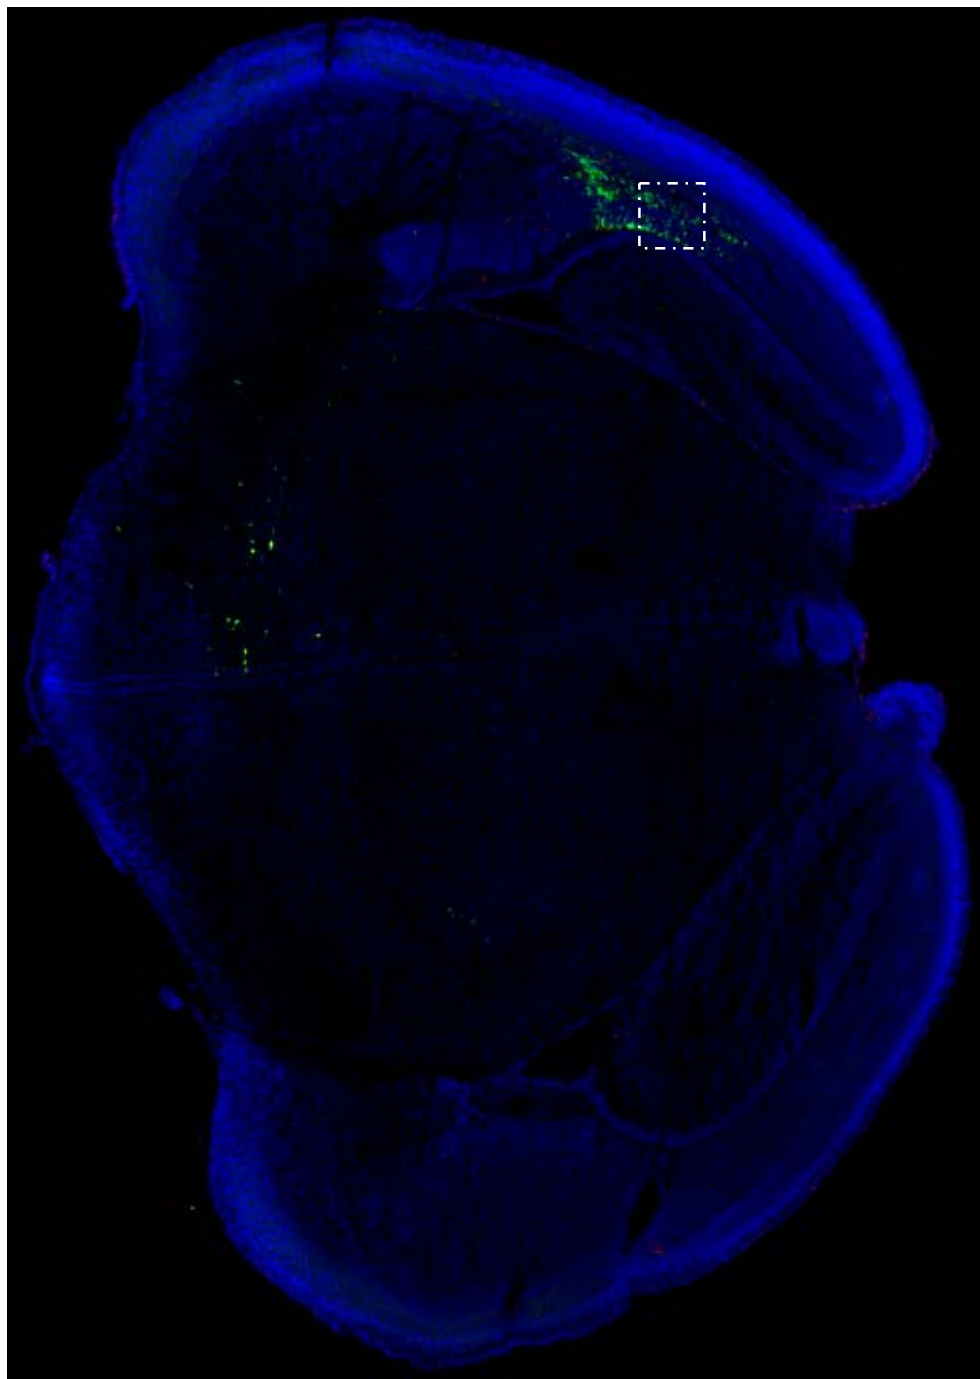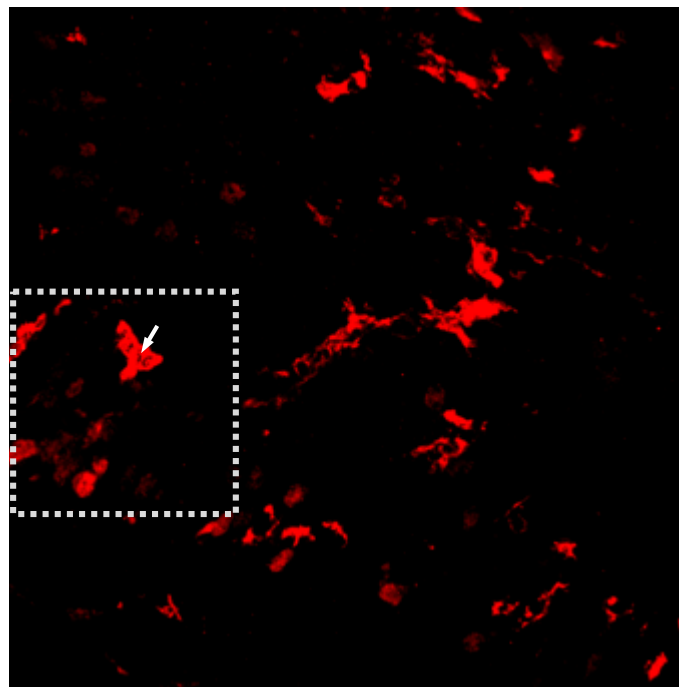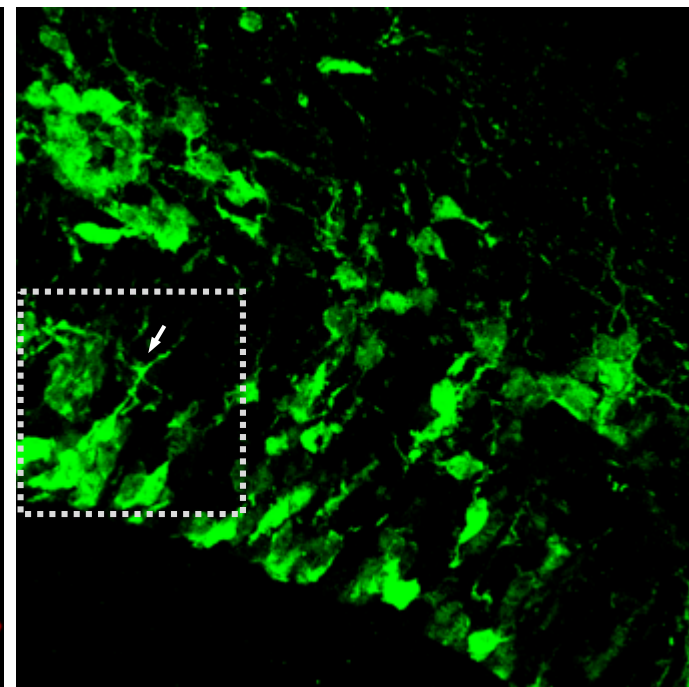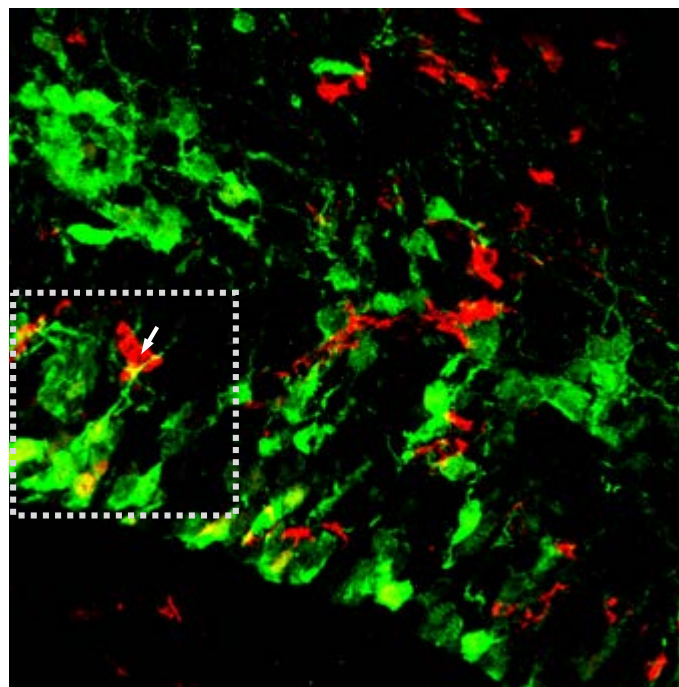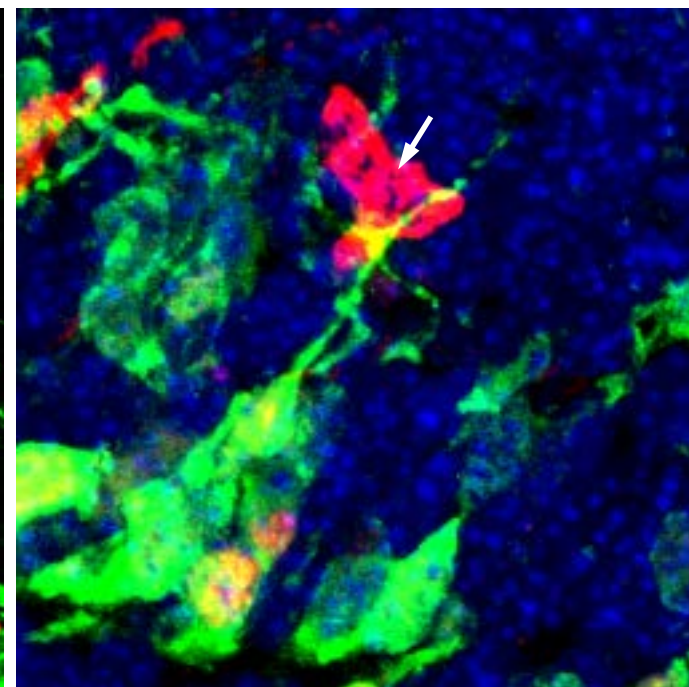

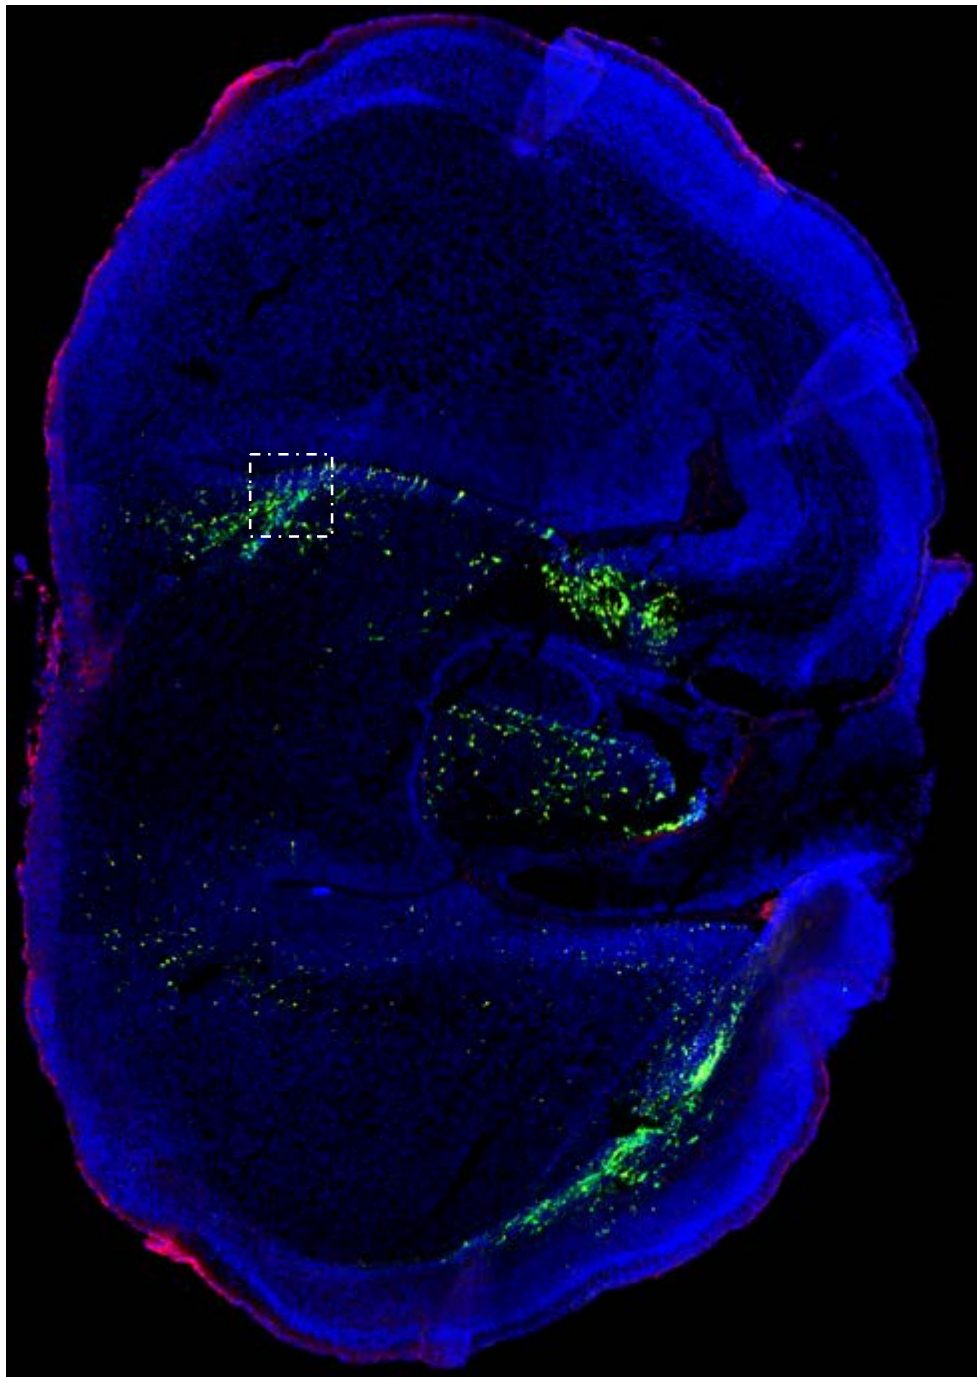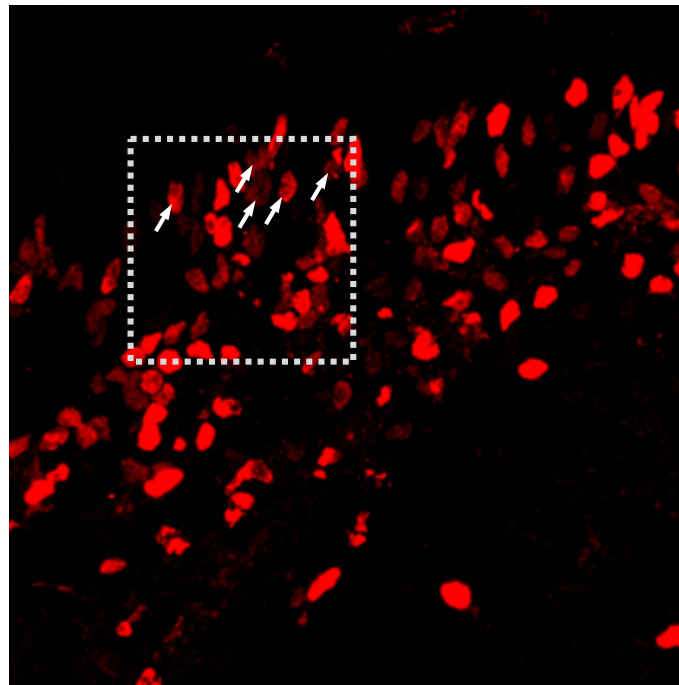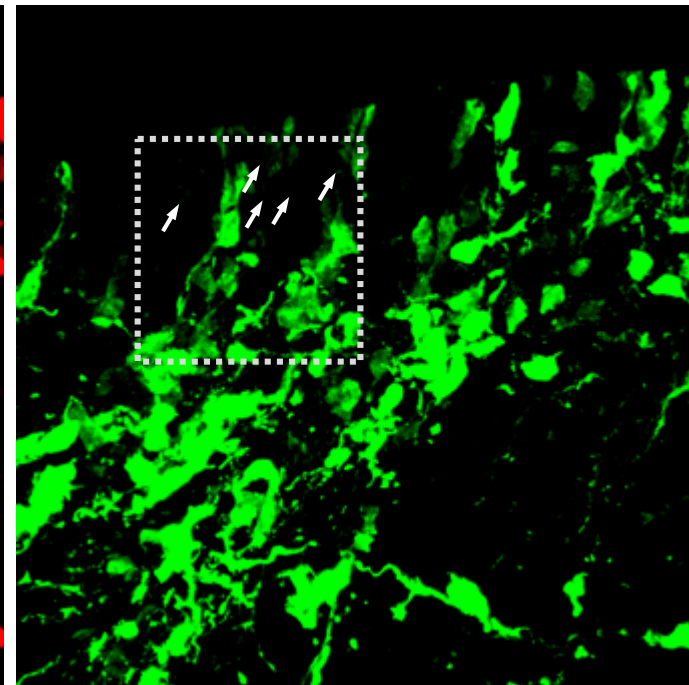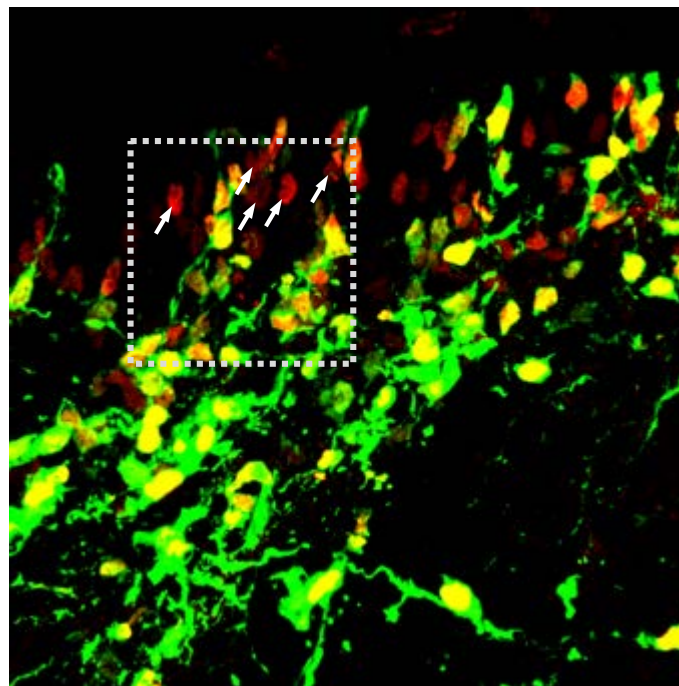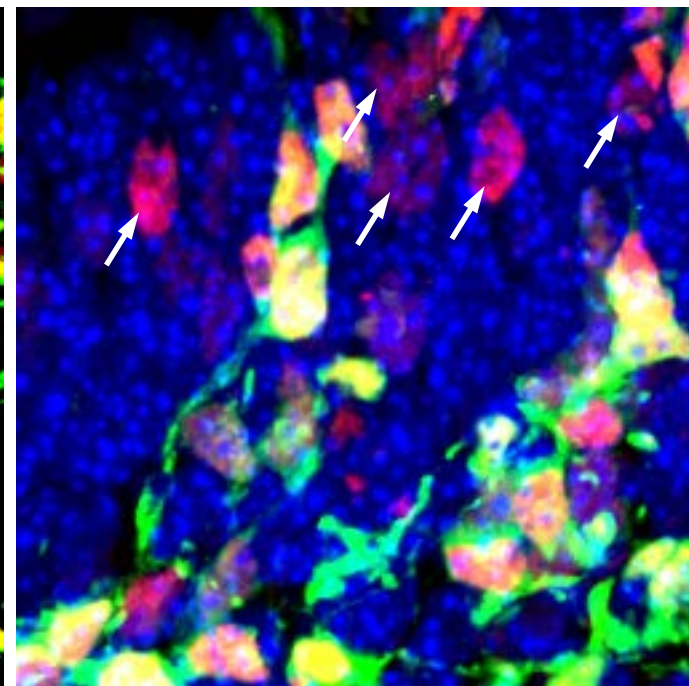

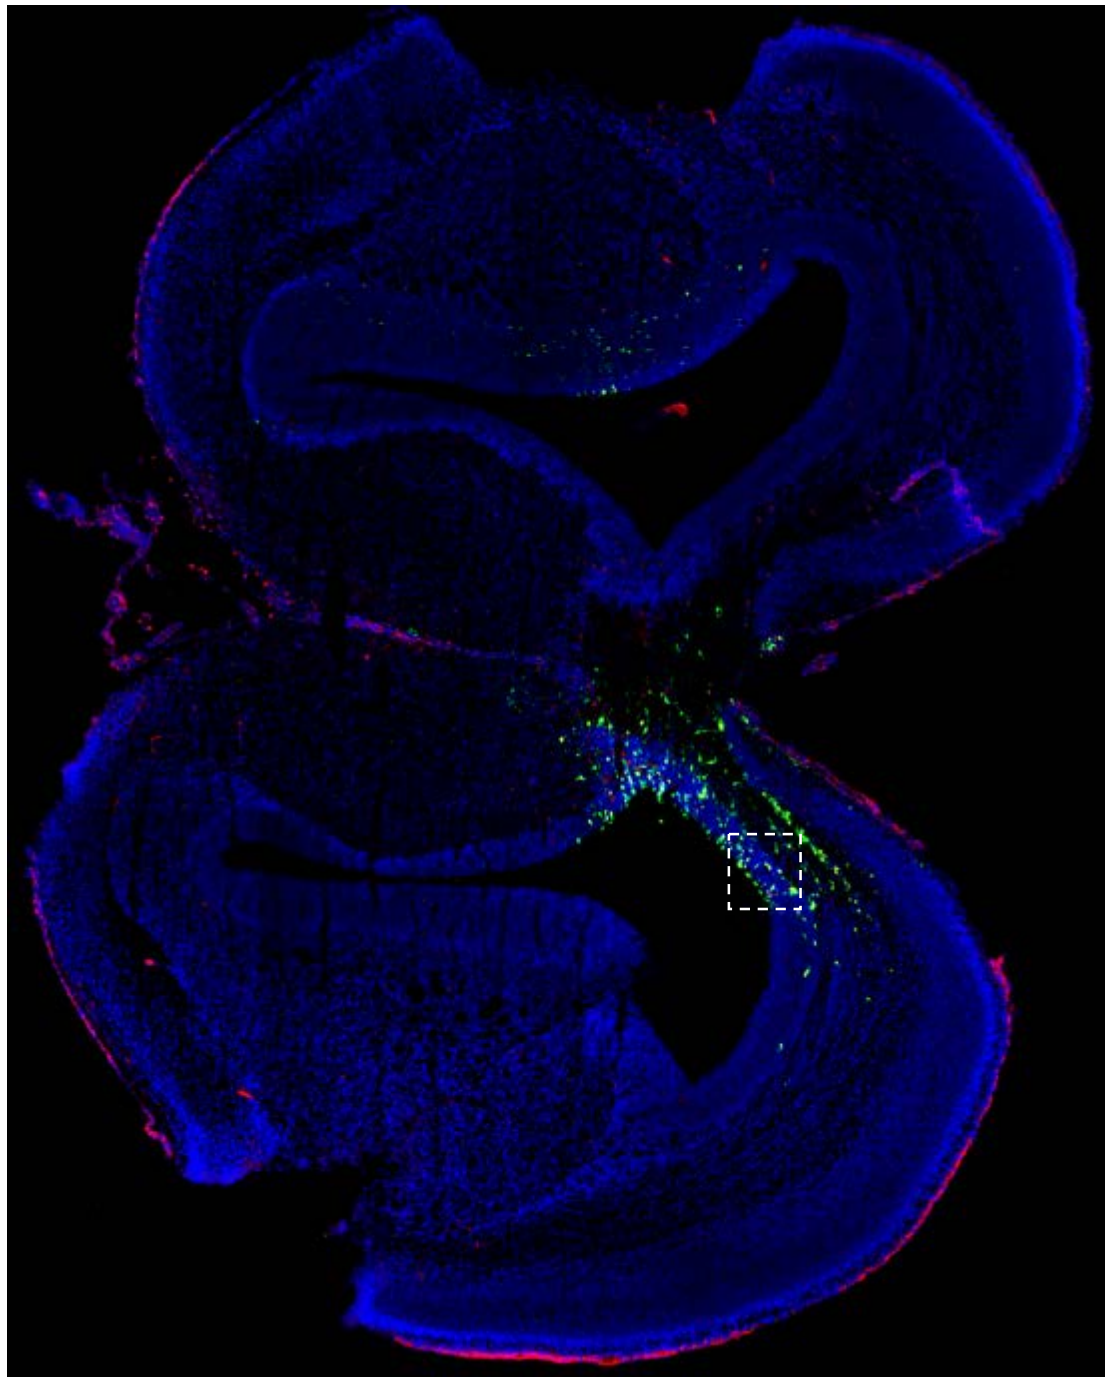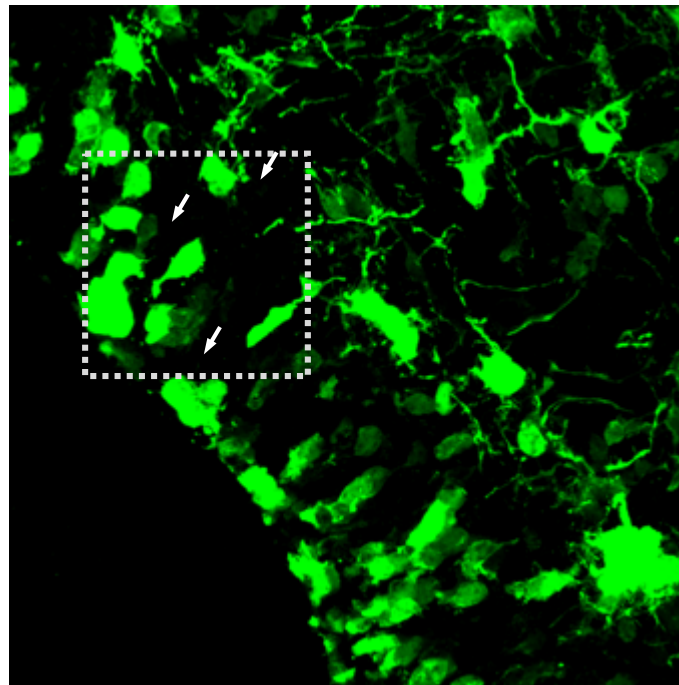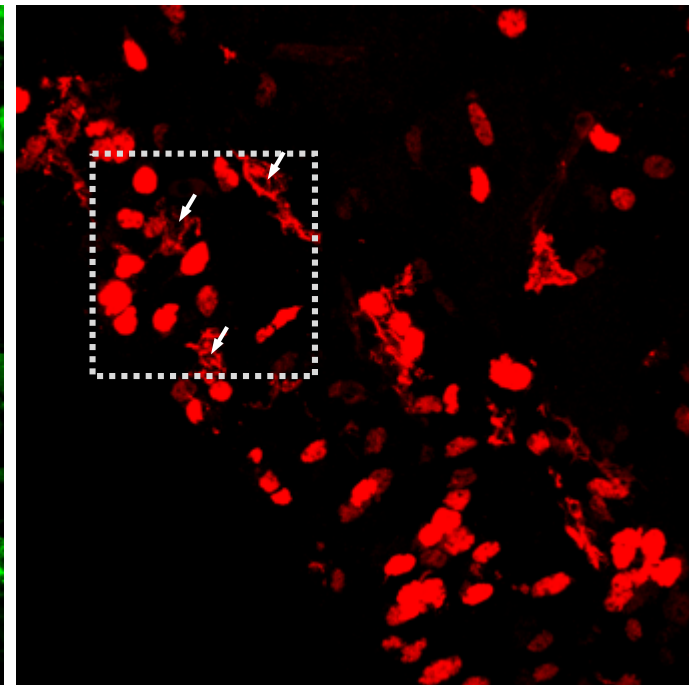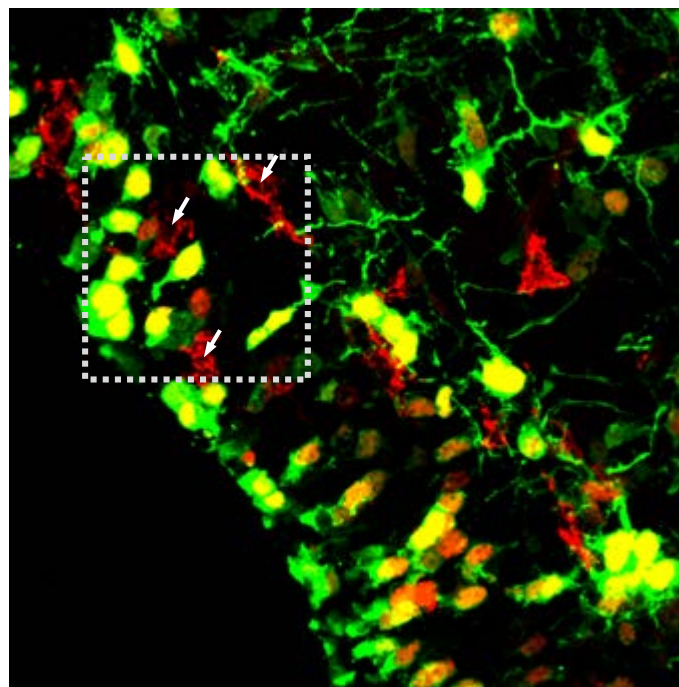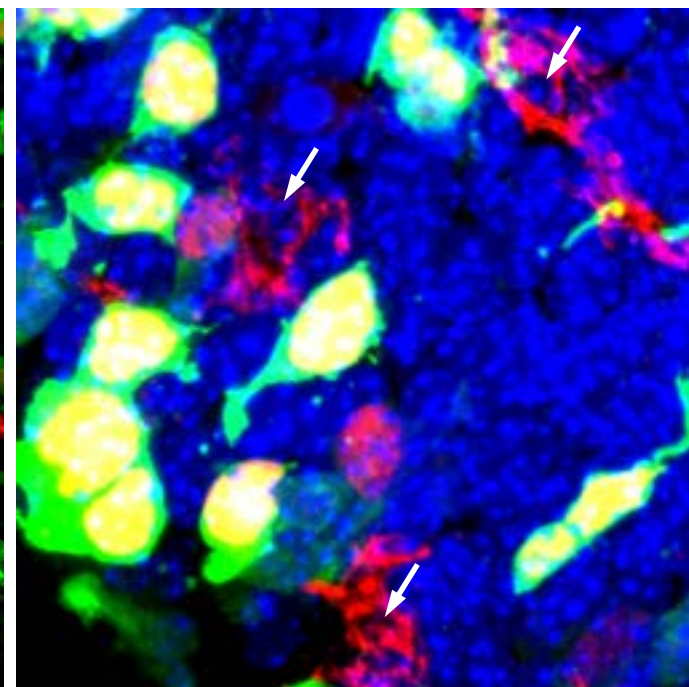

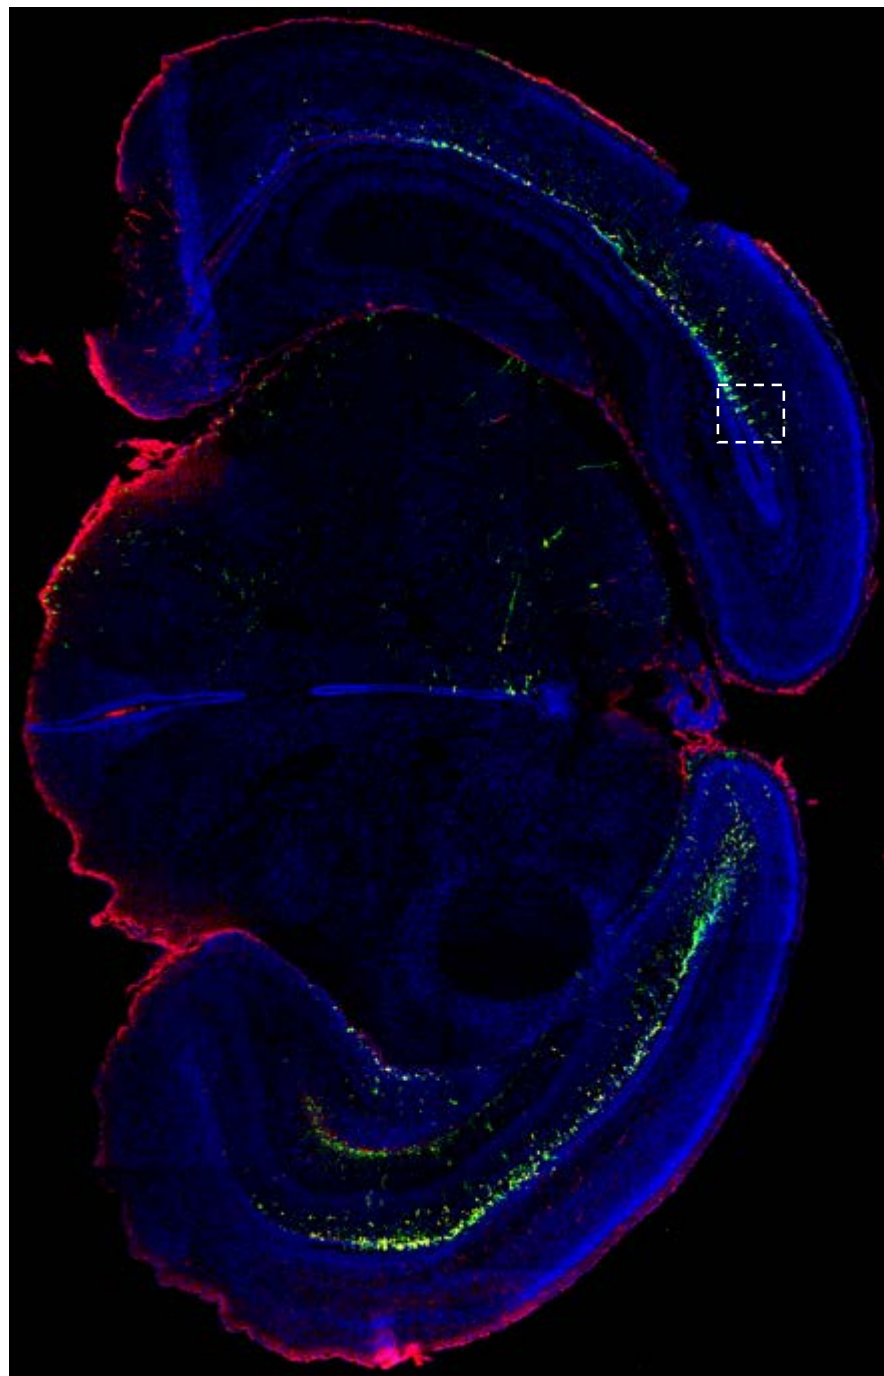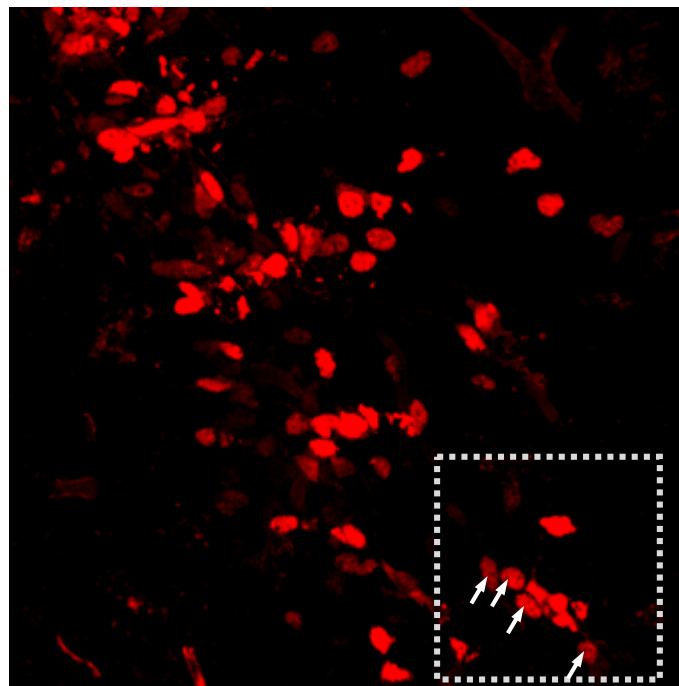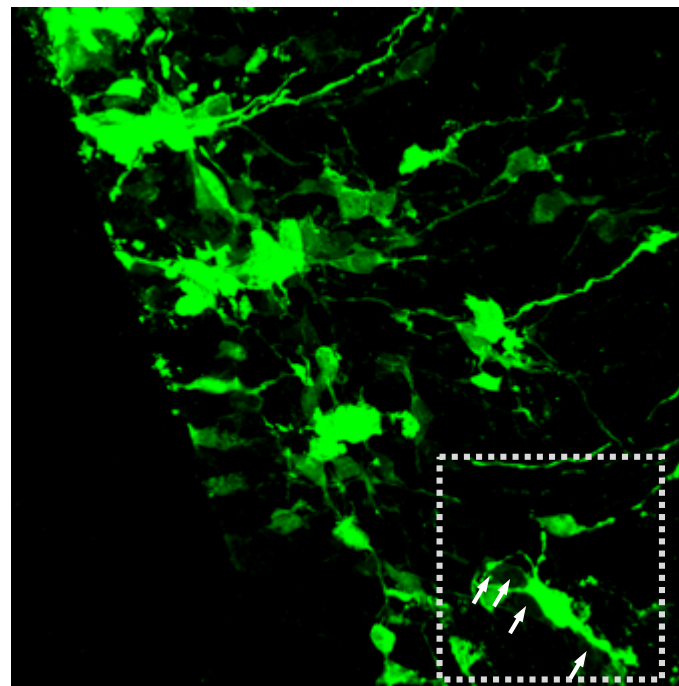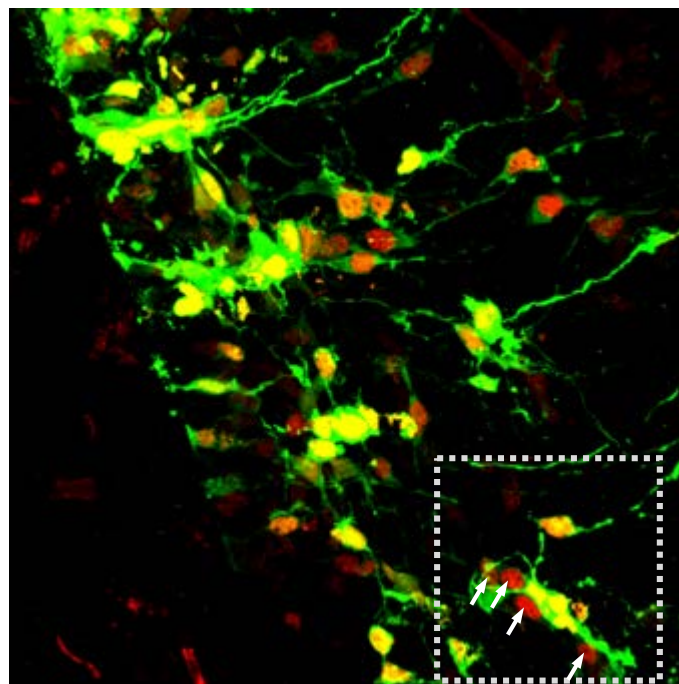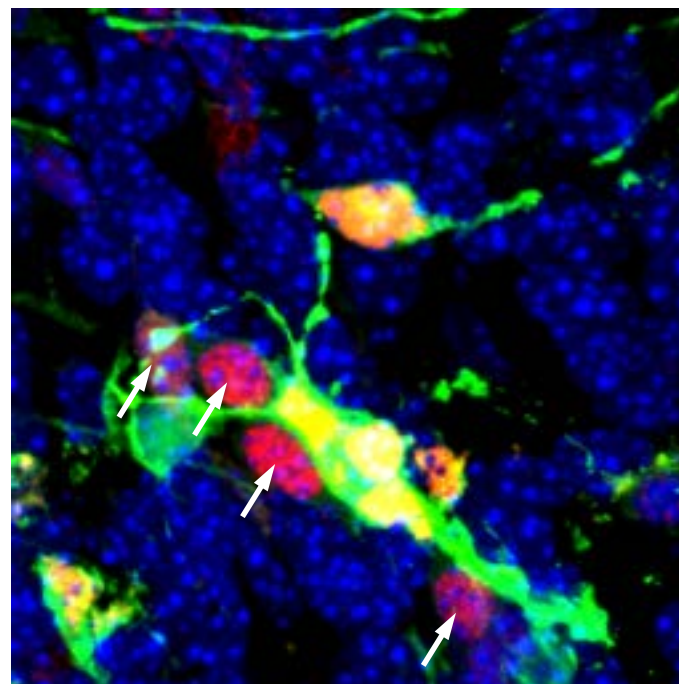

ej115. PAX6

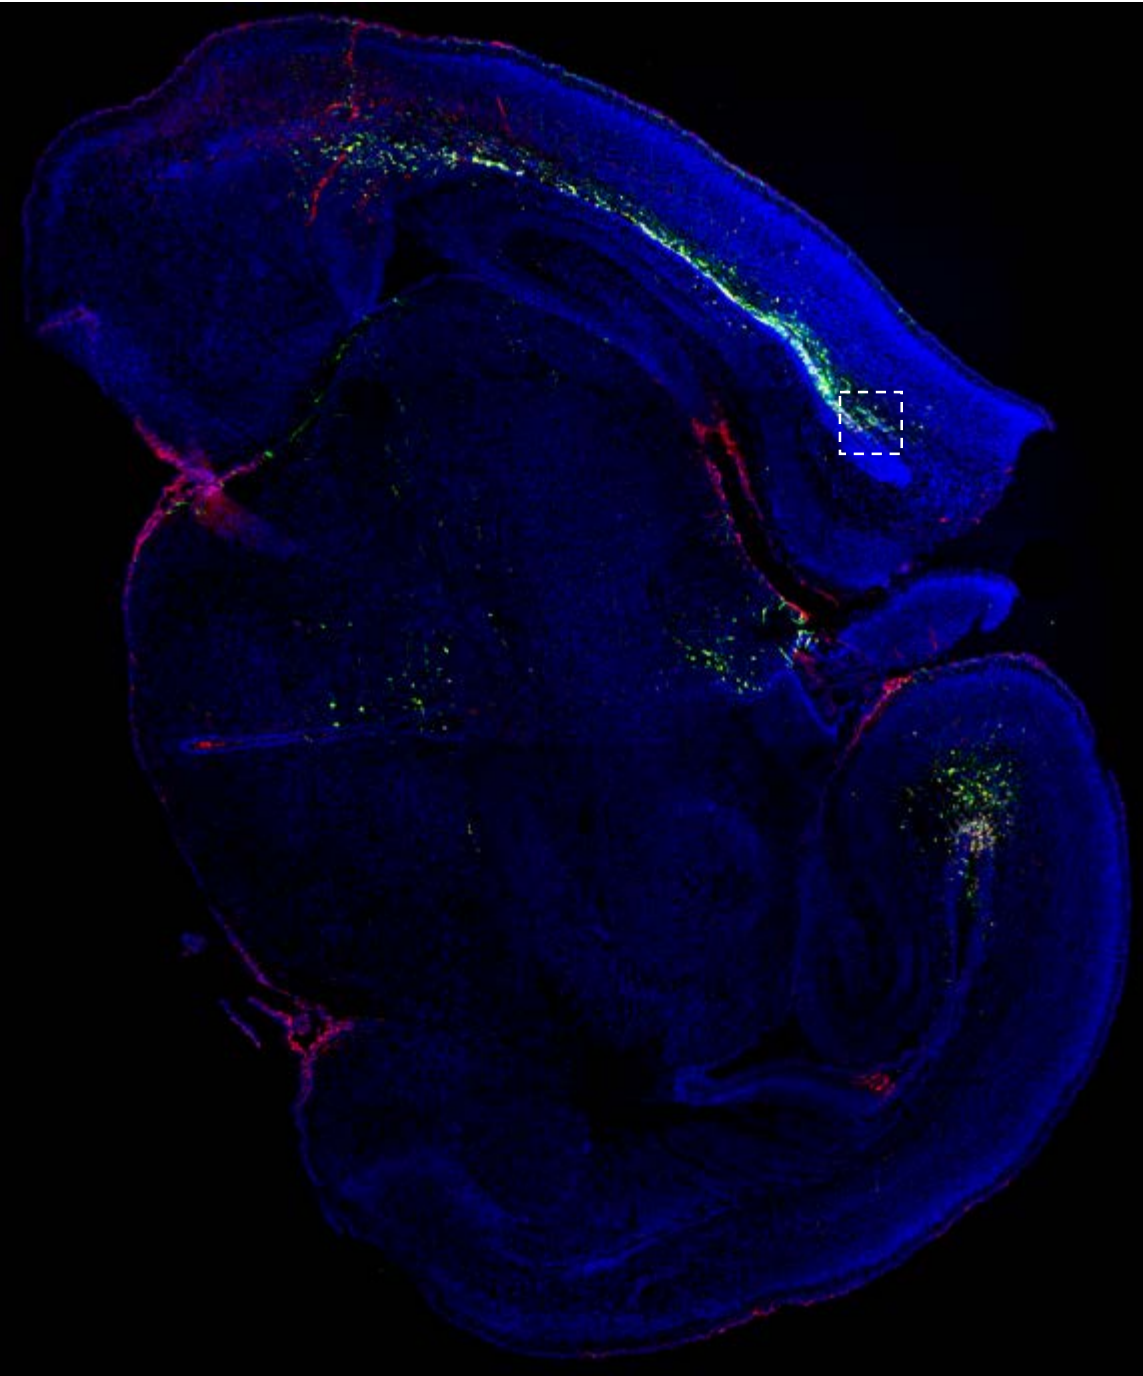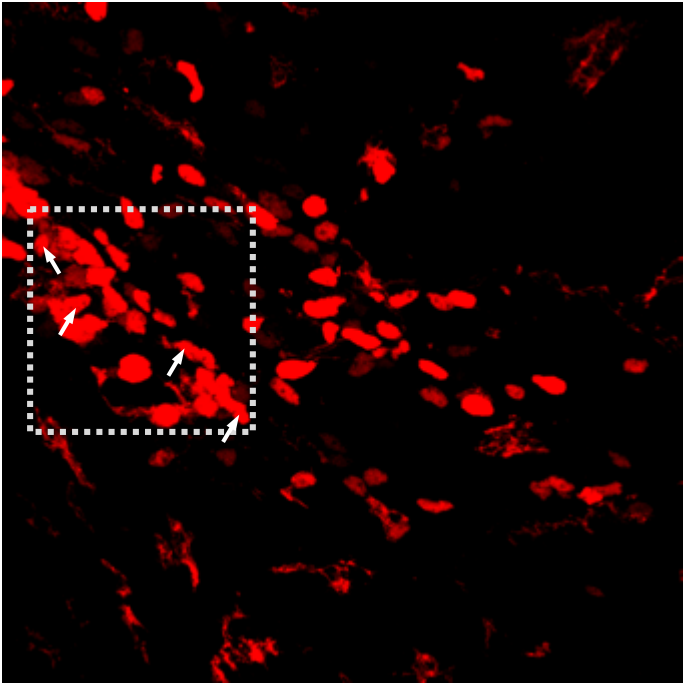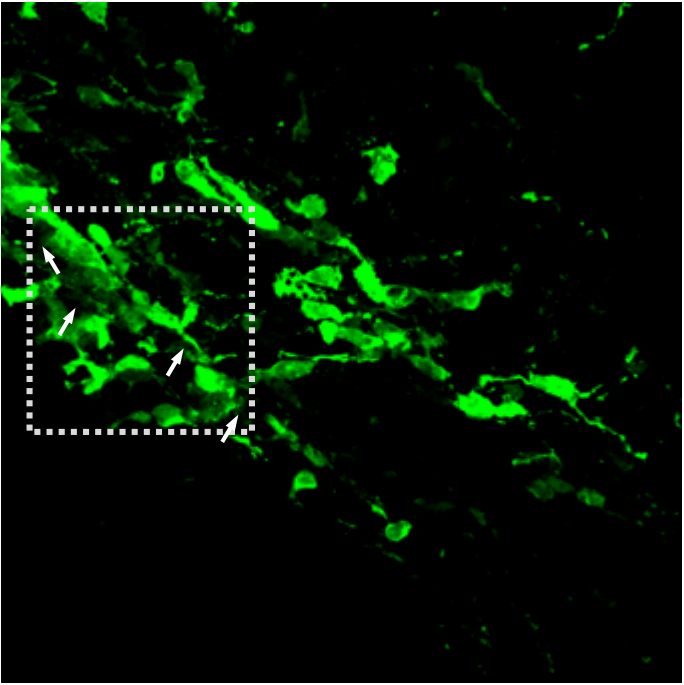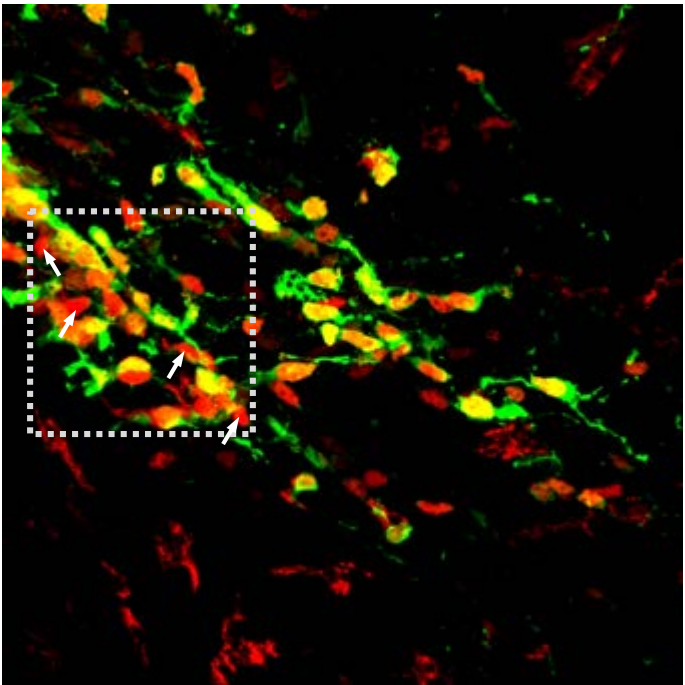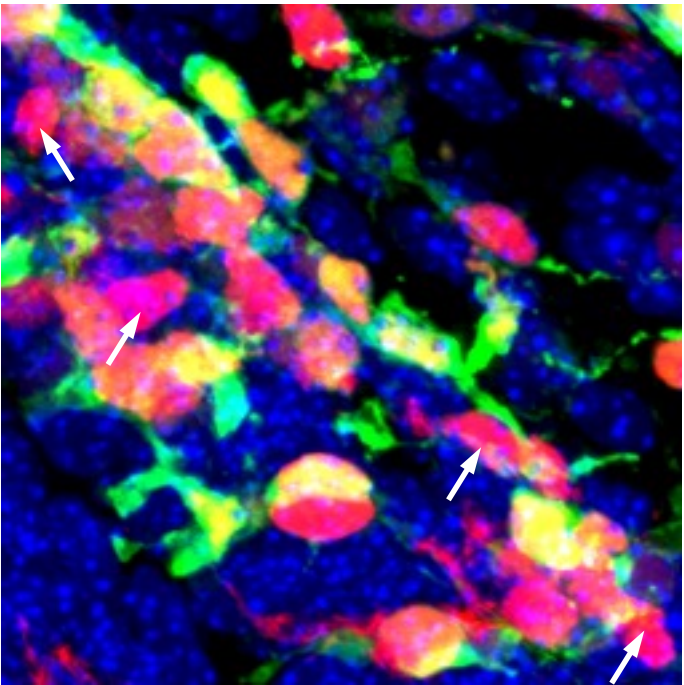

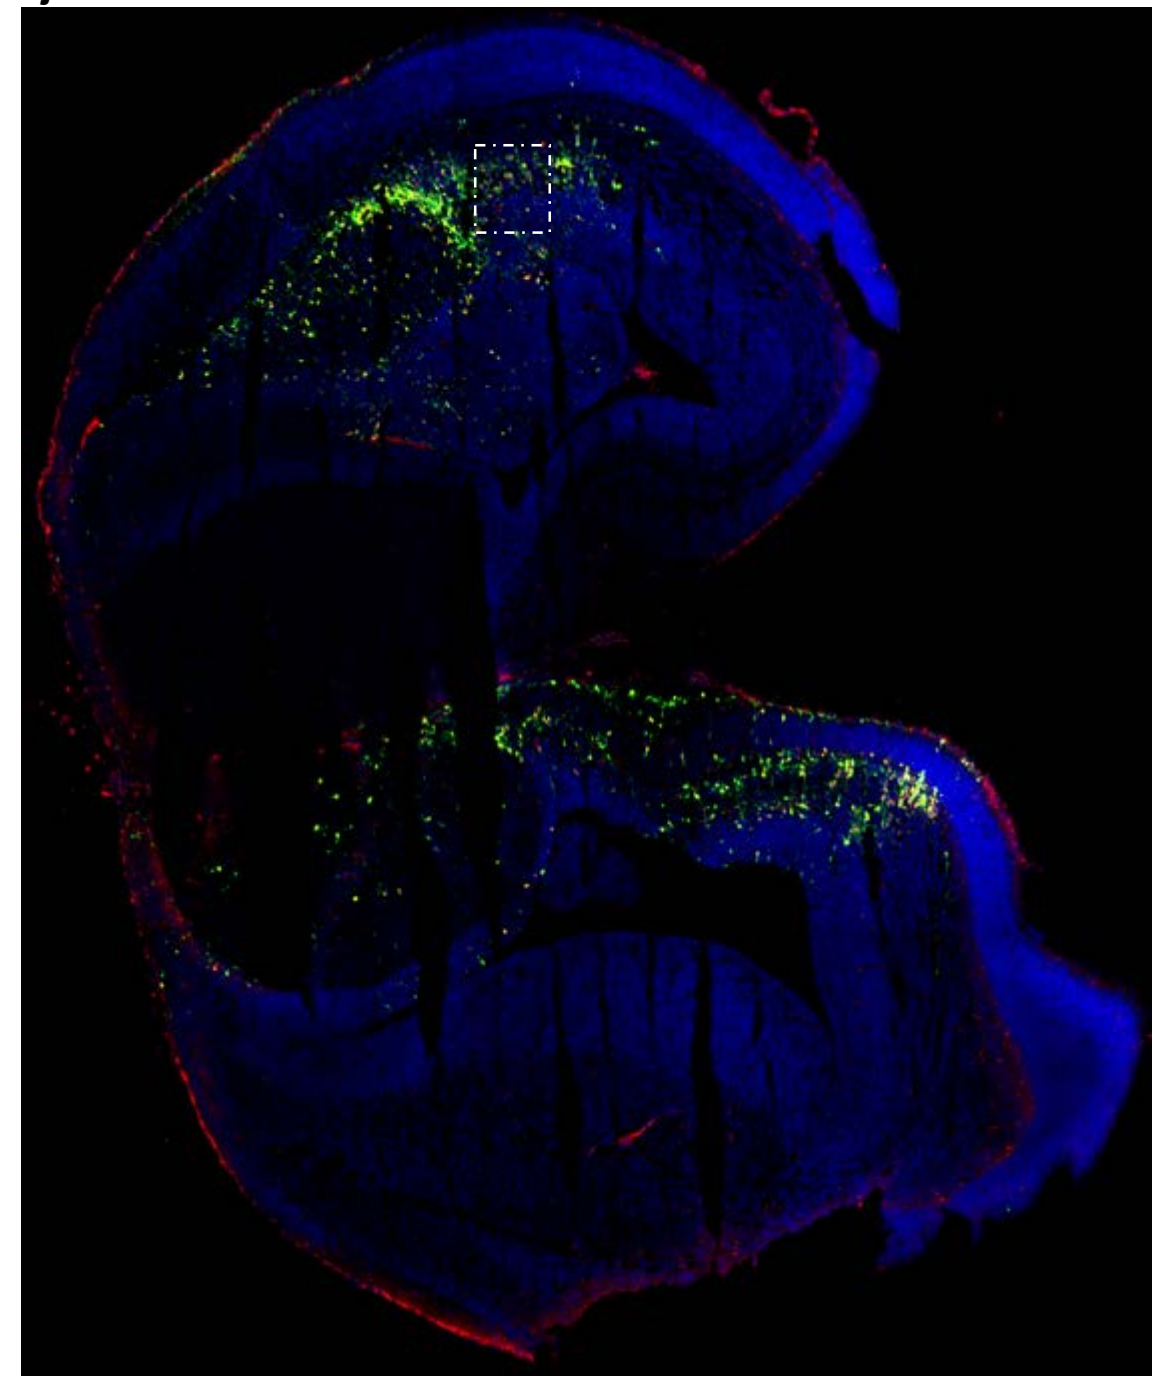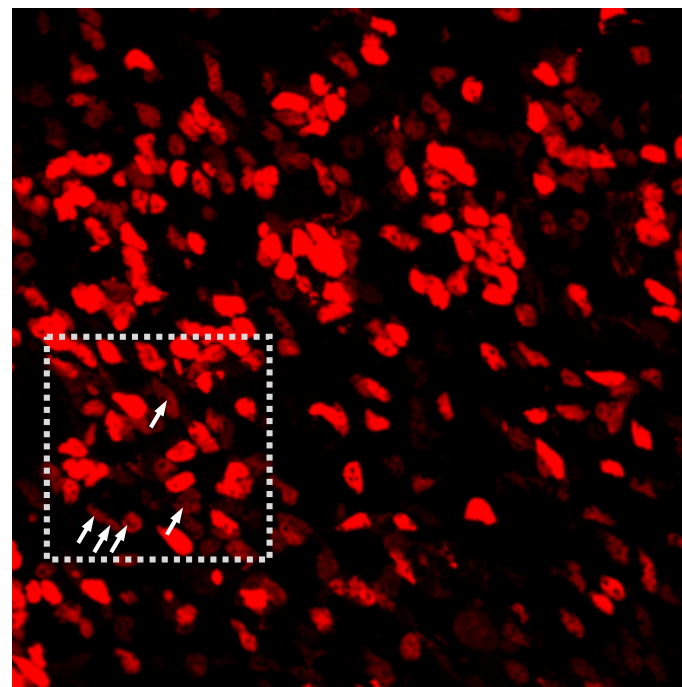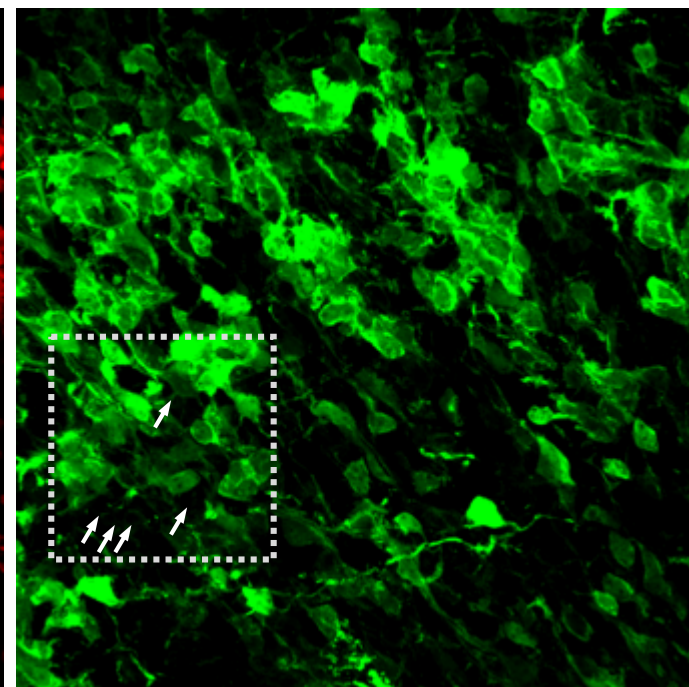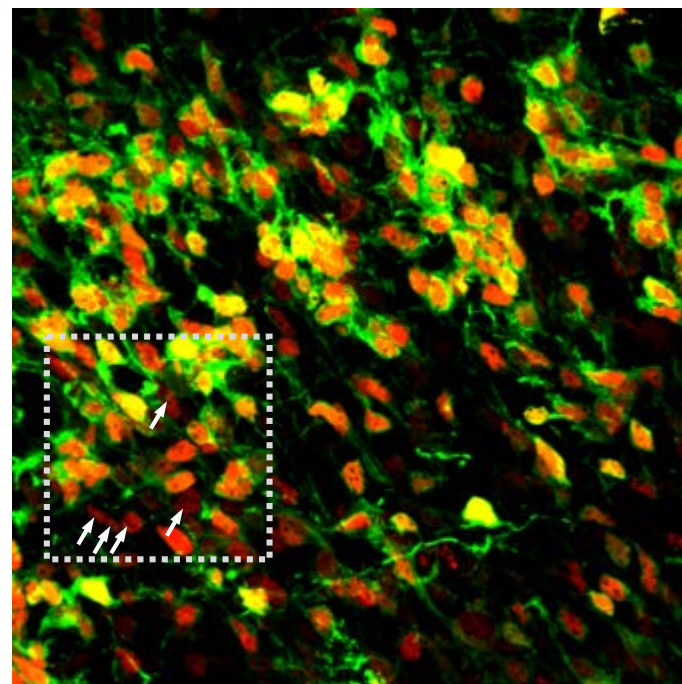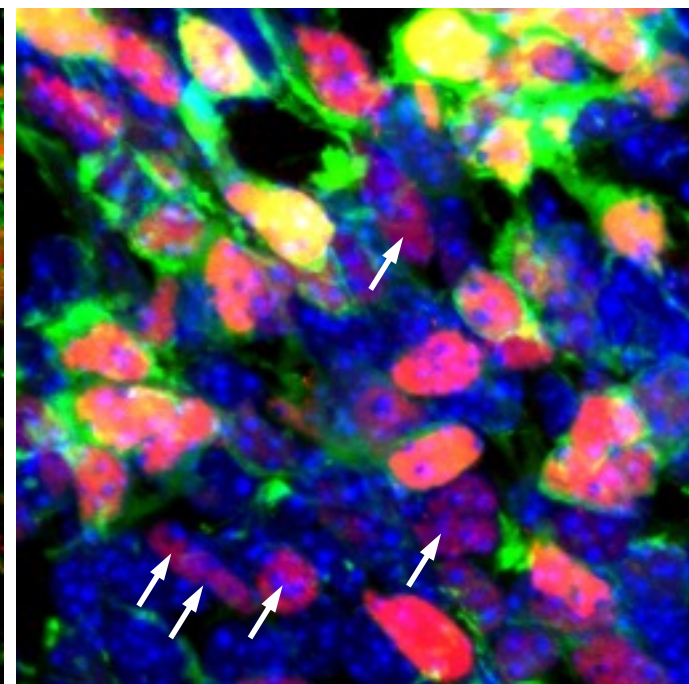

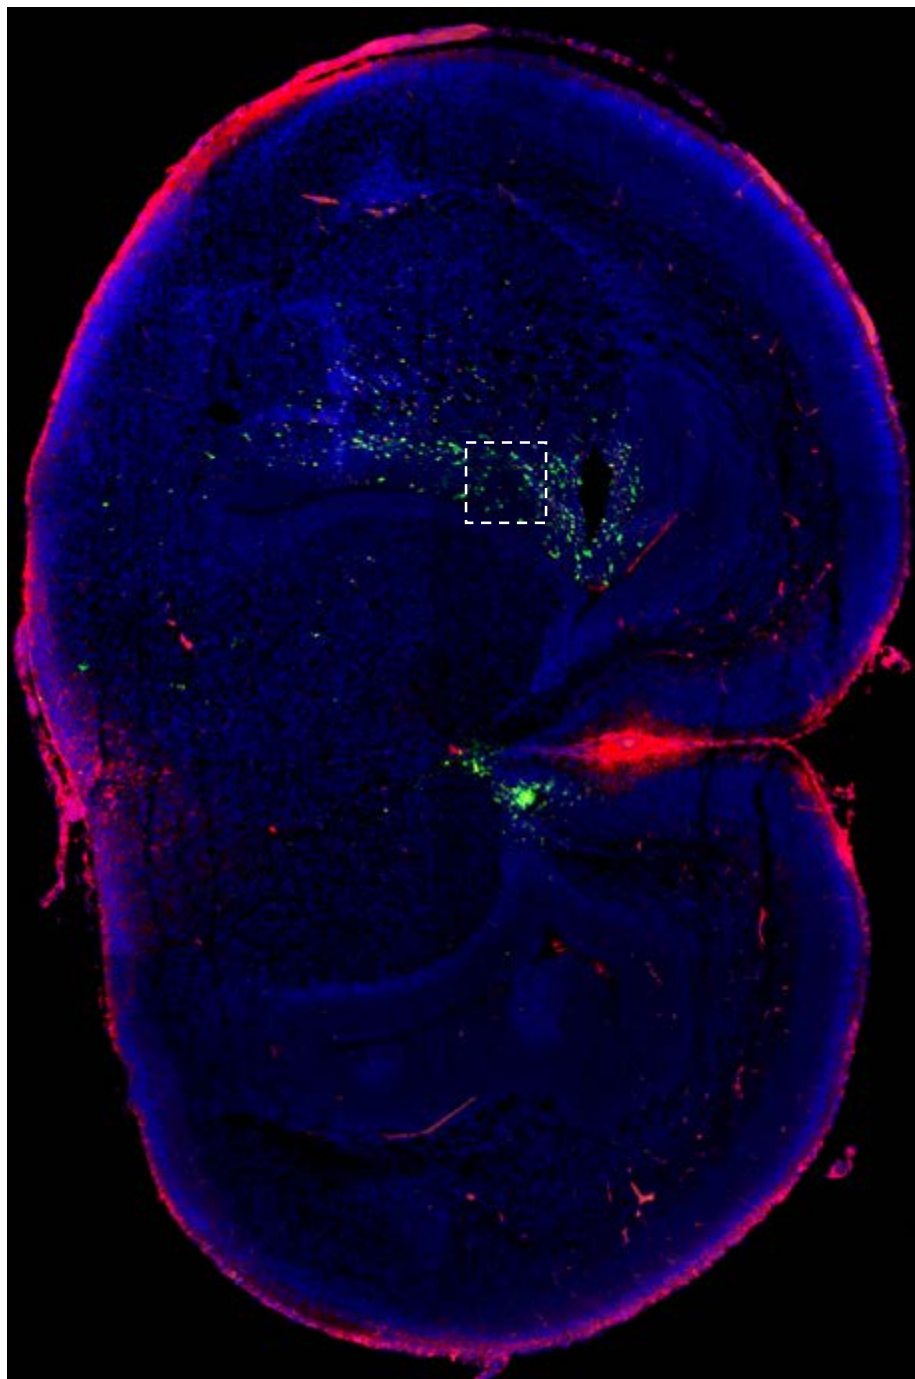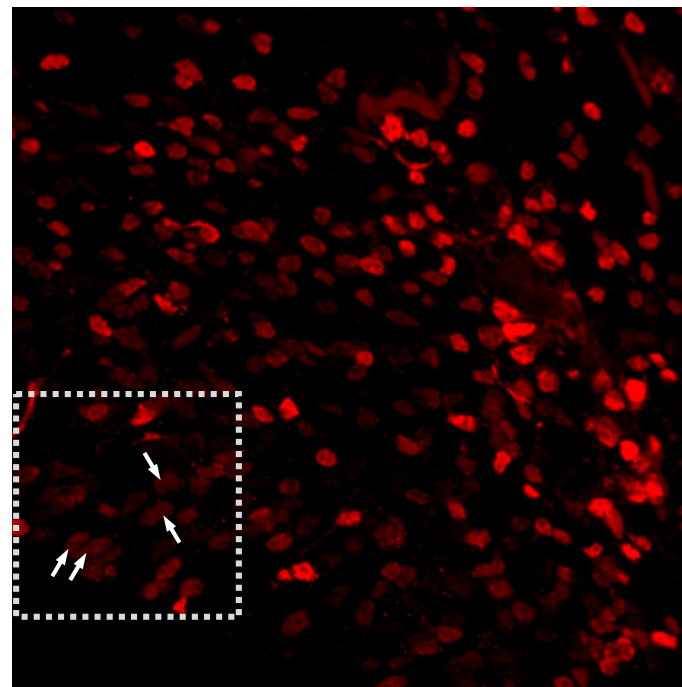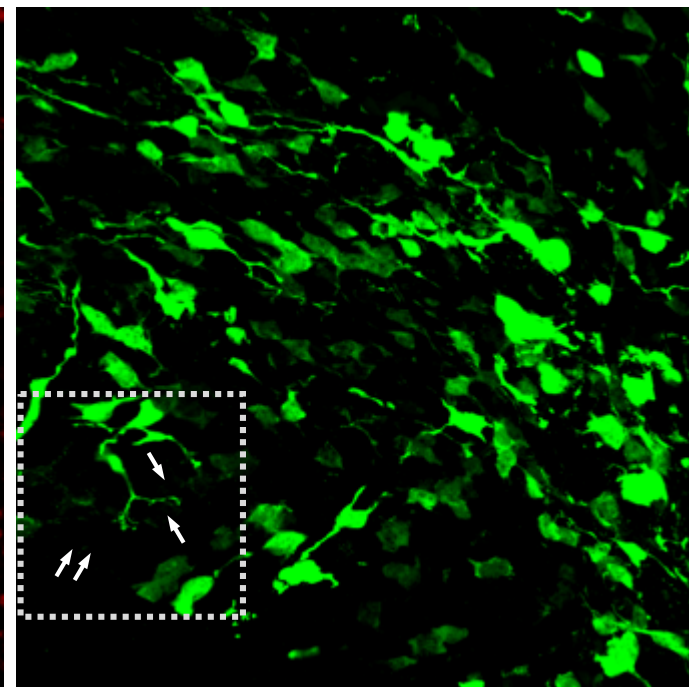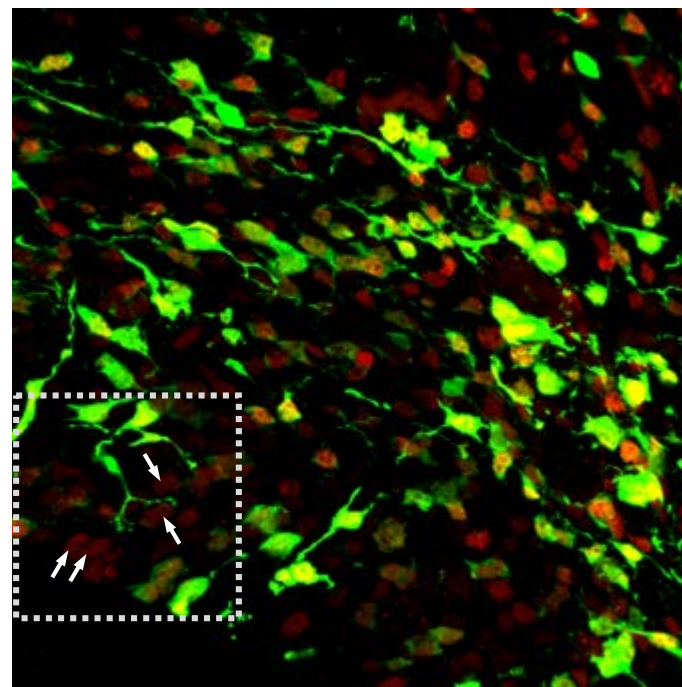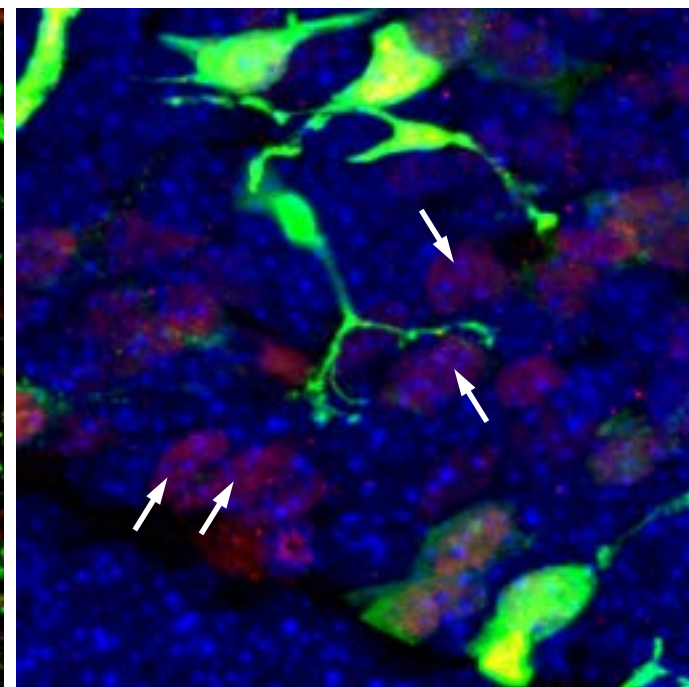

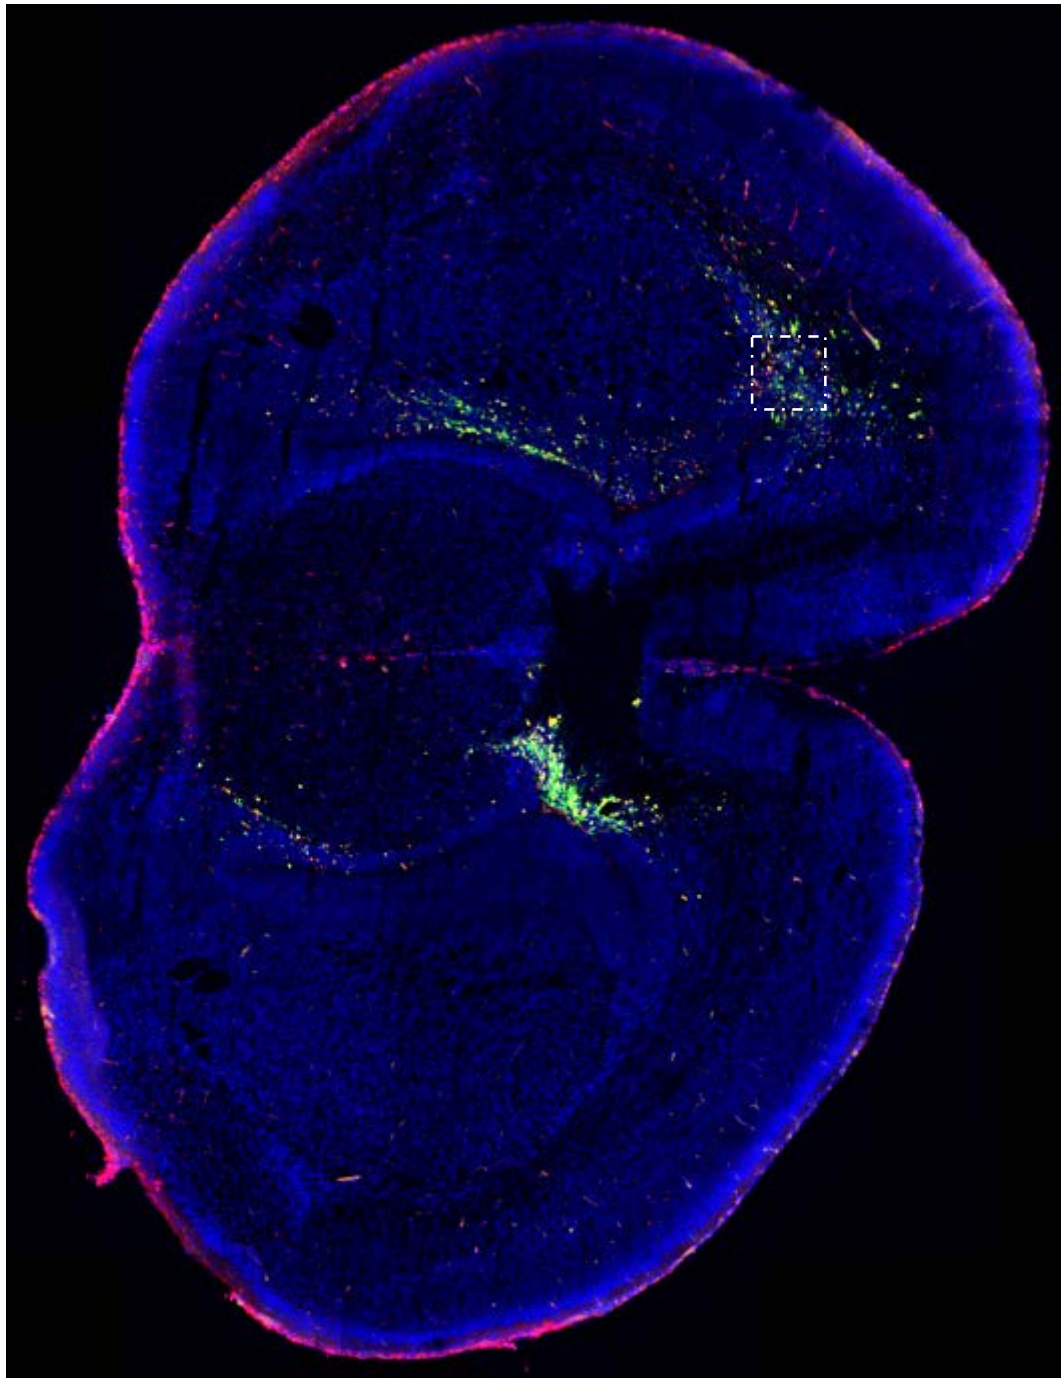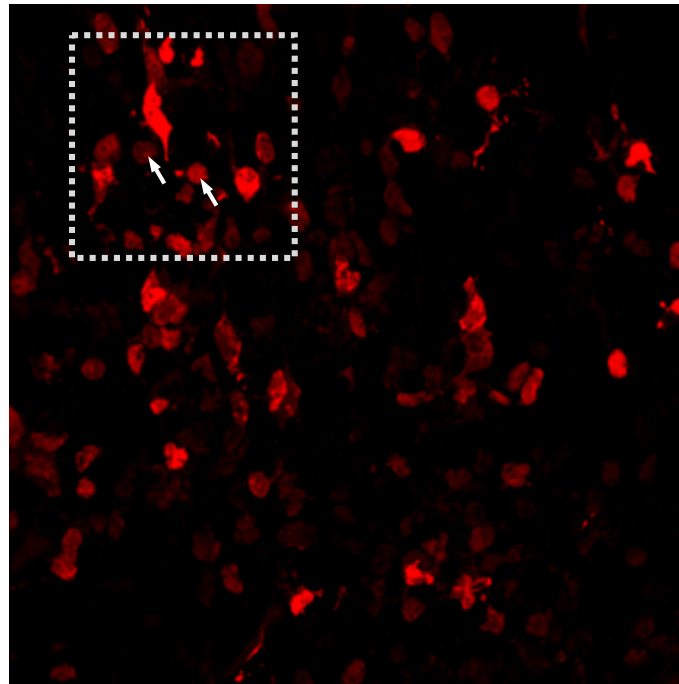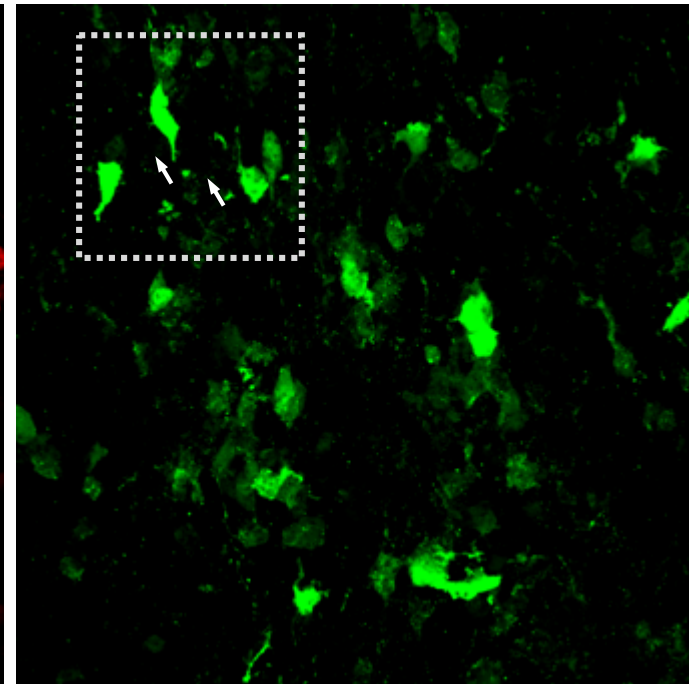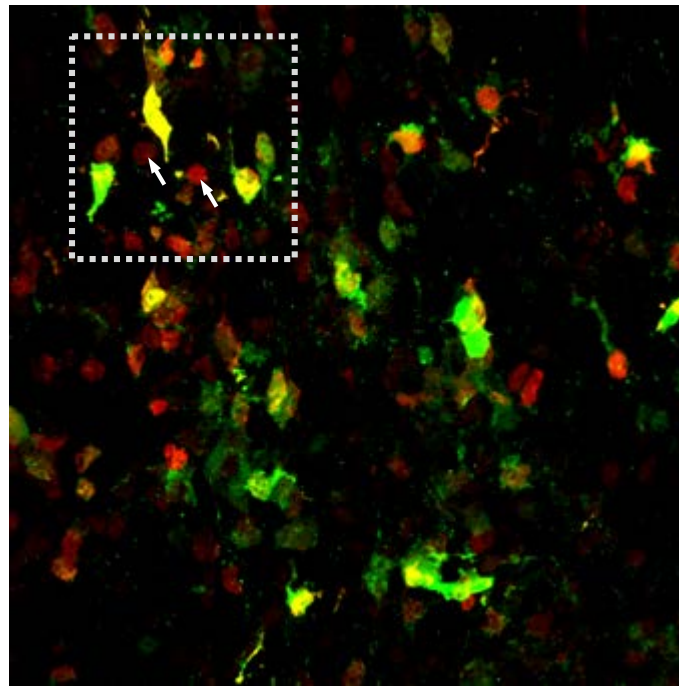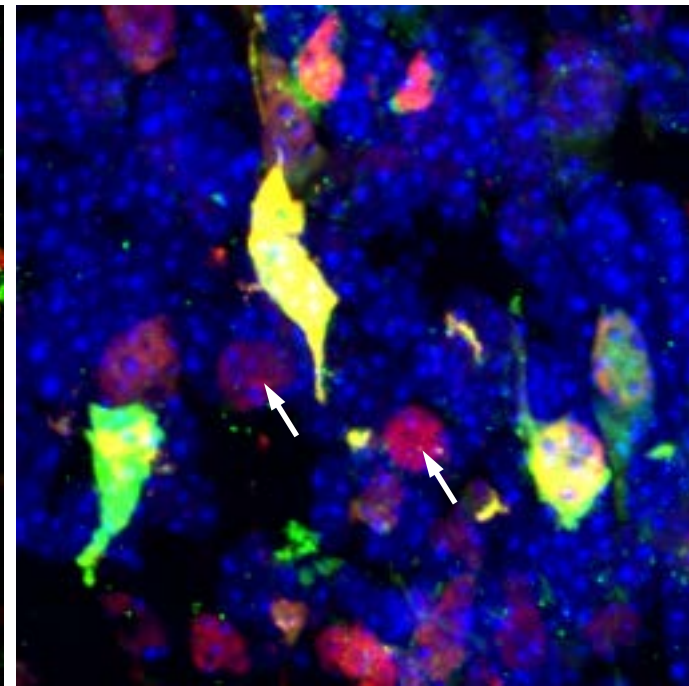

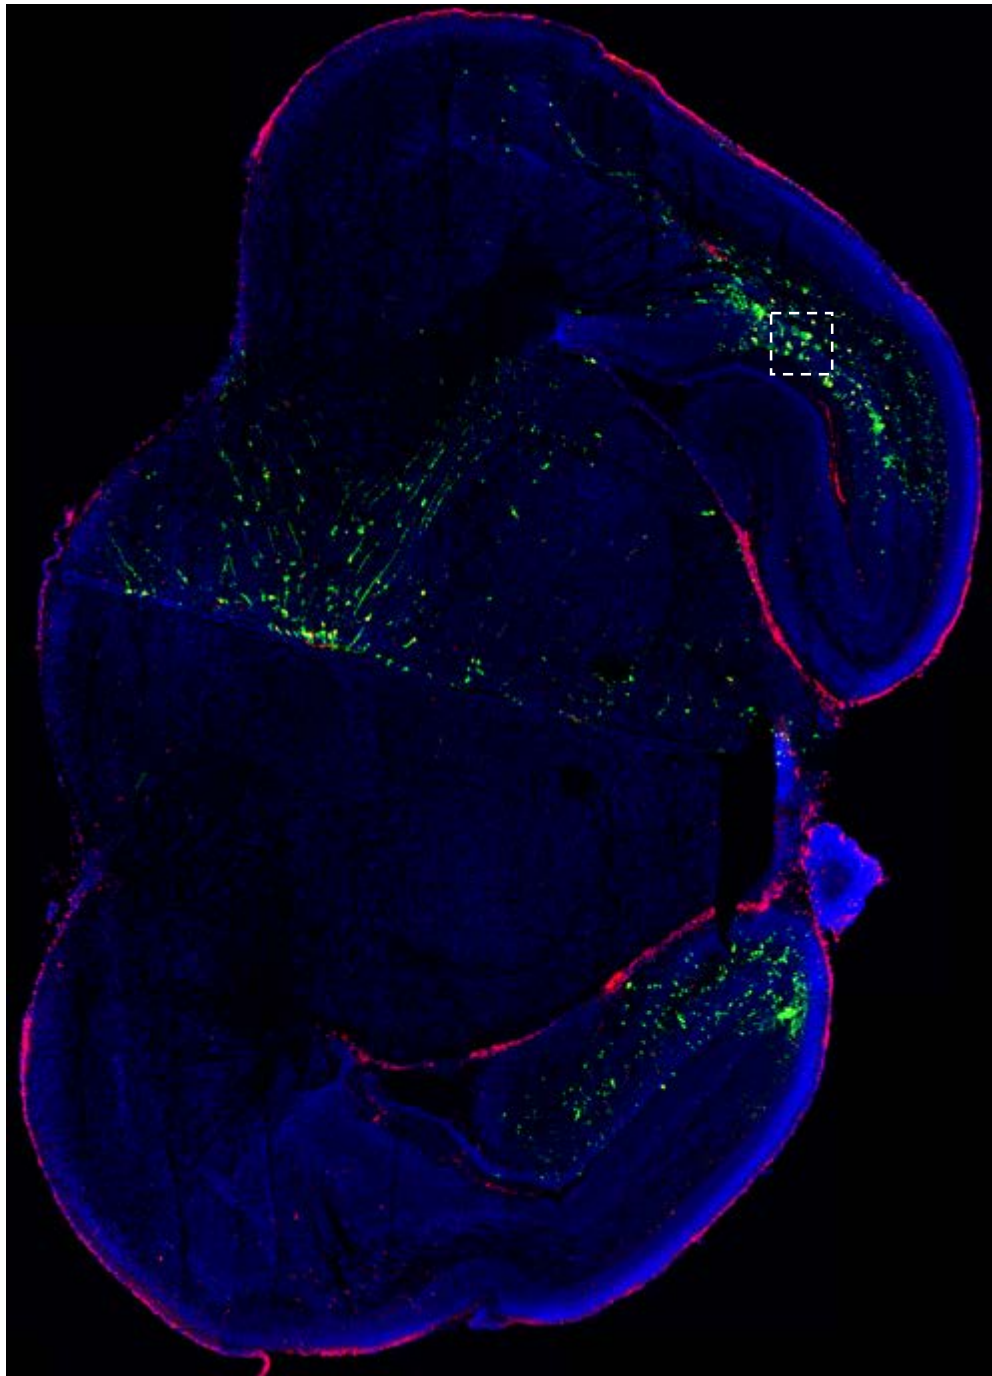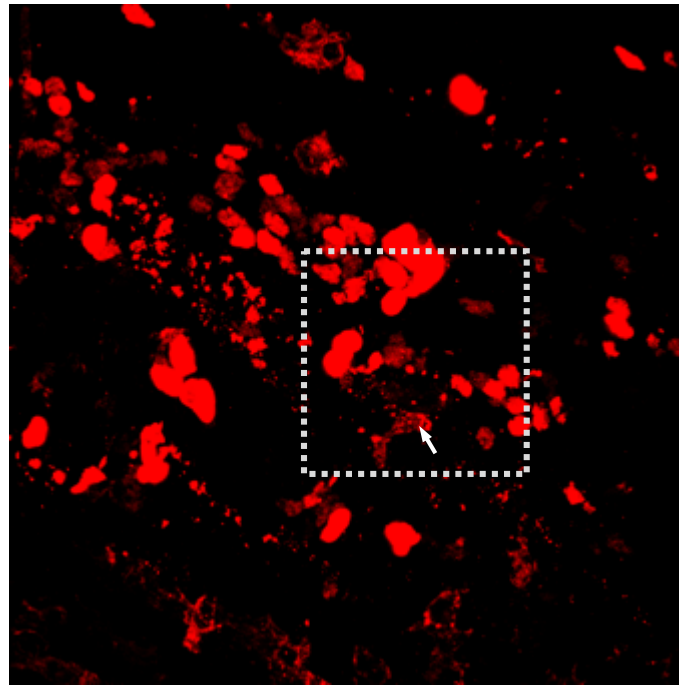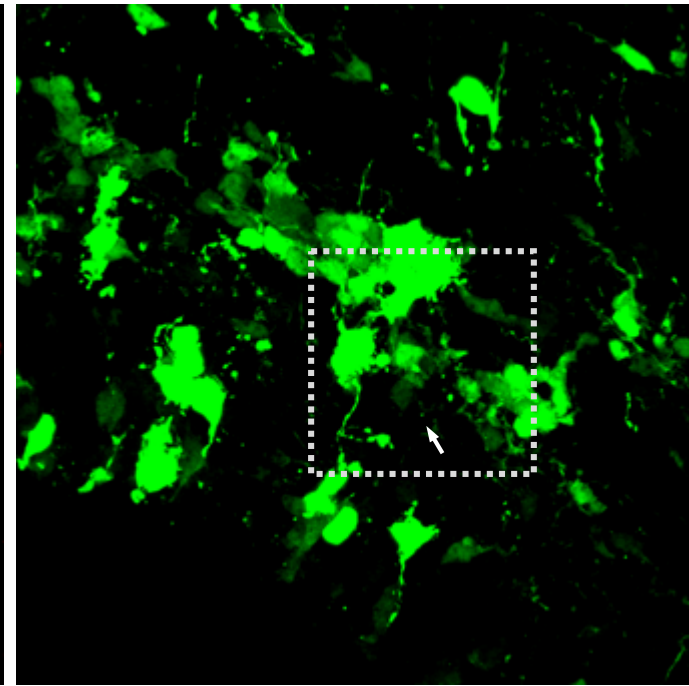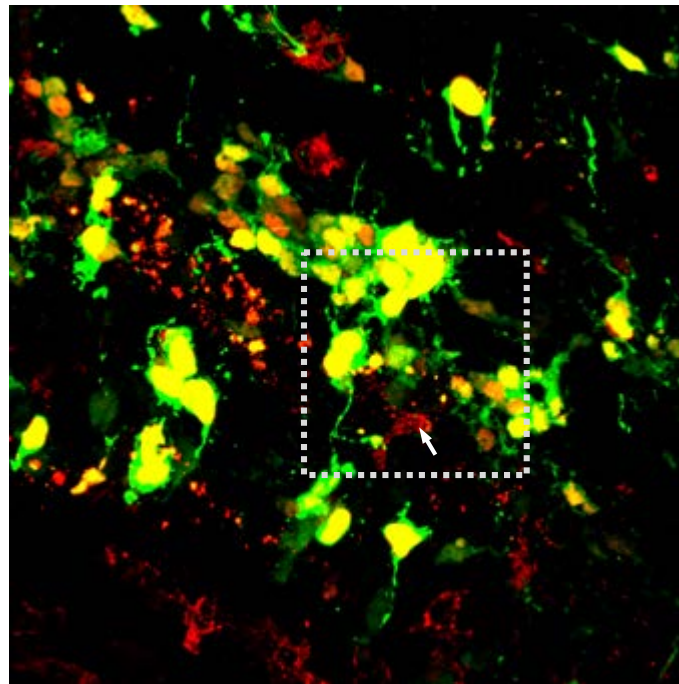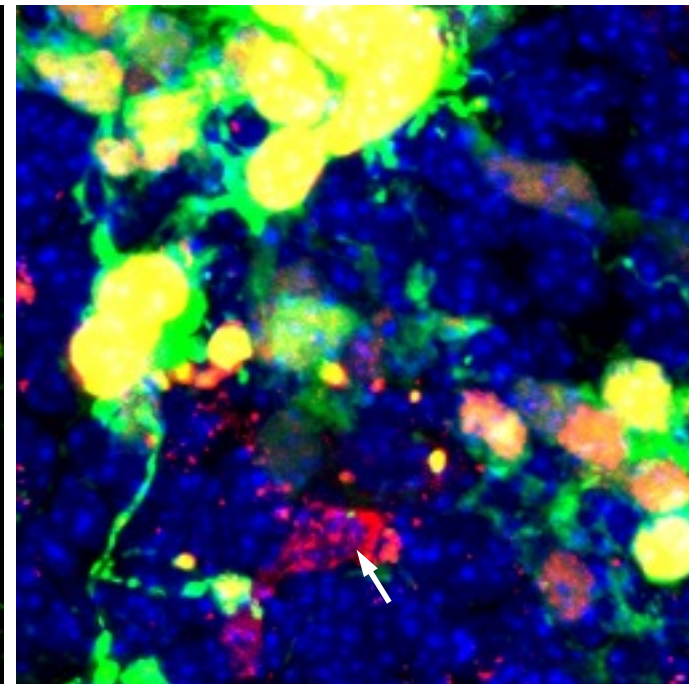

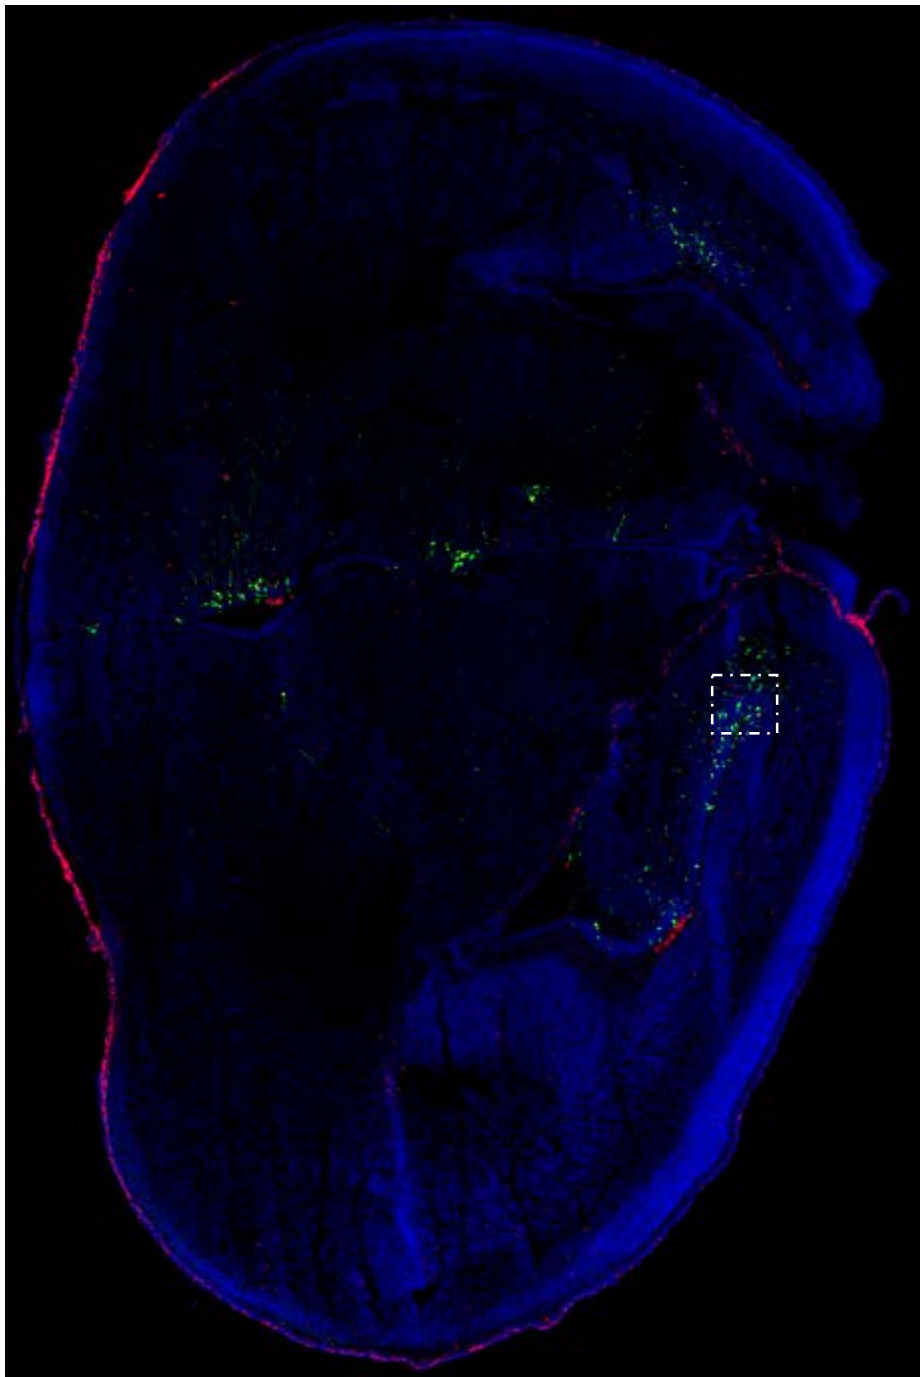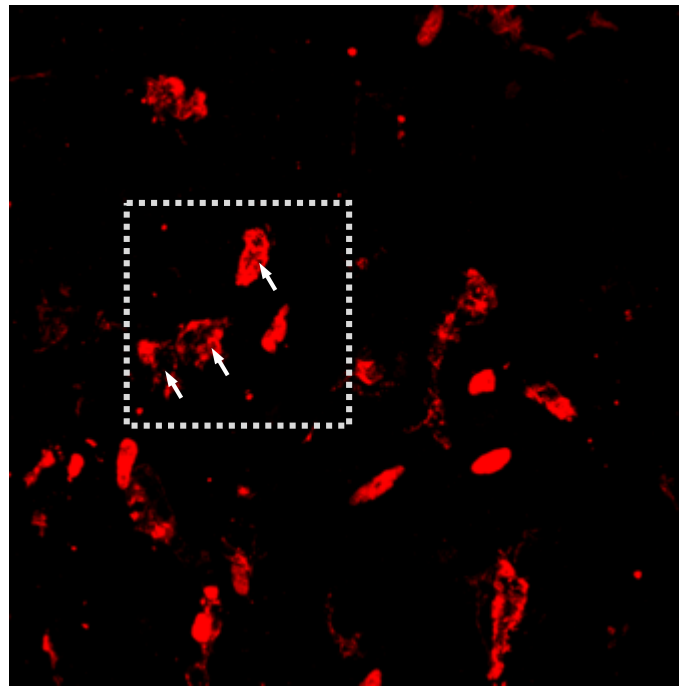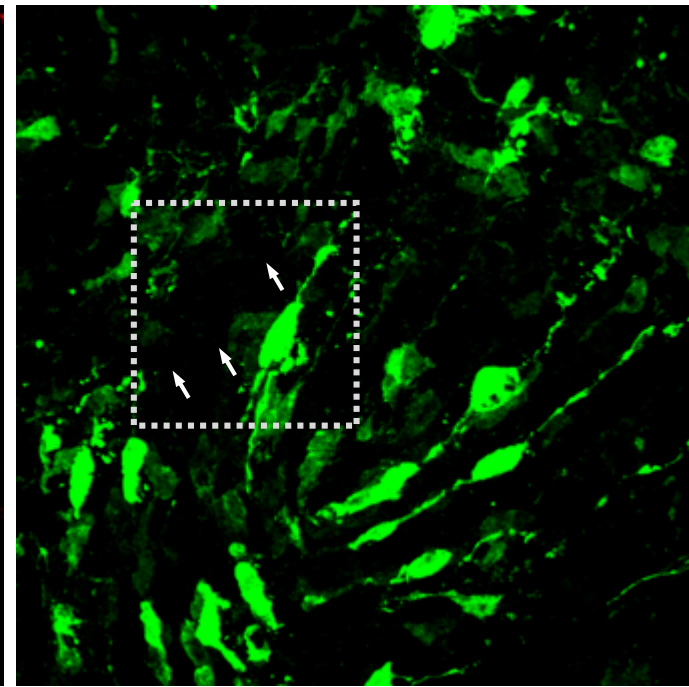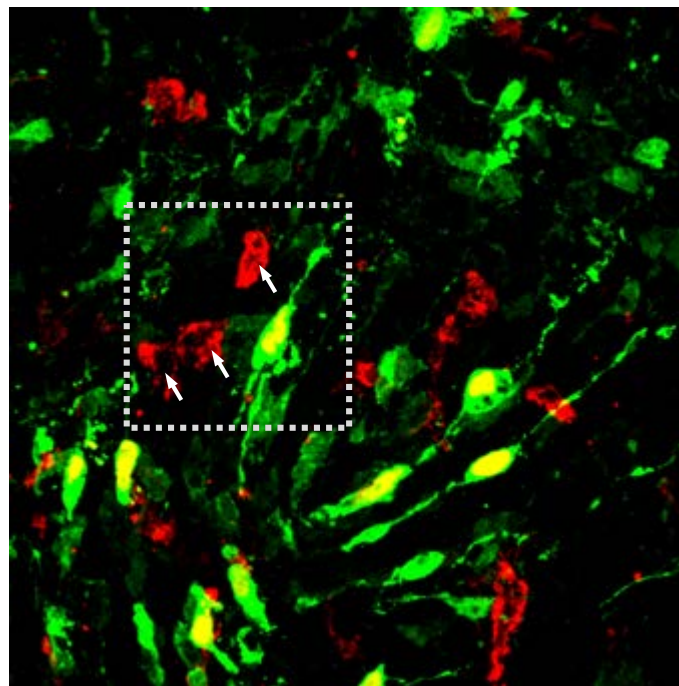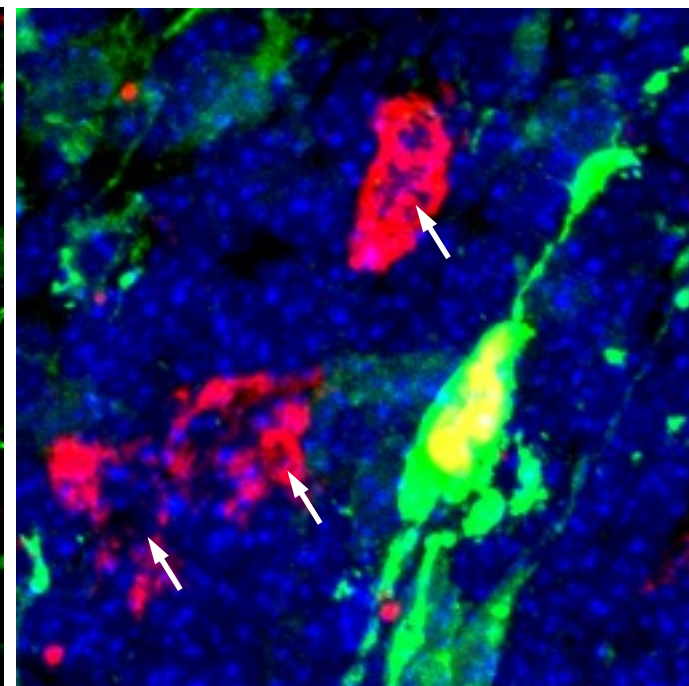

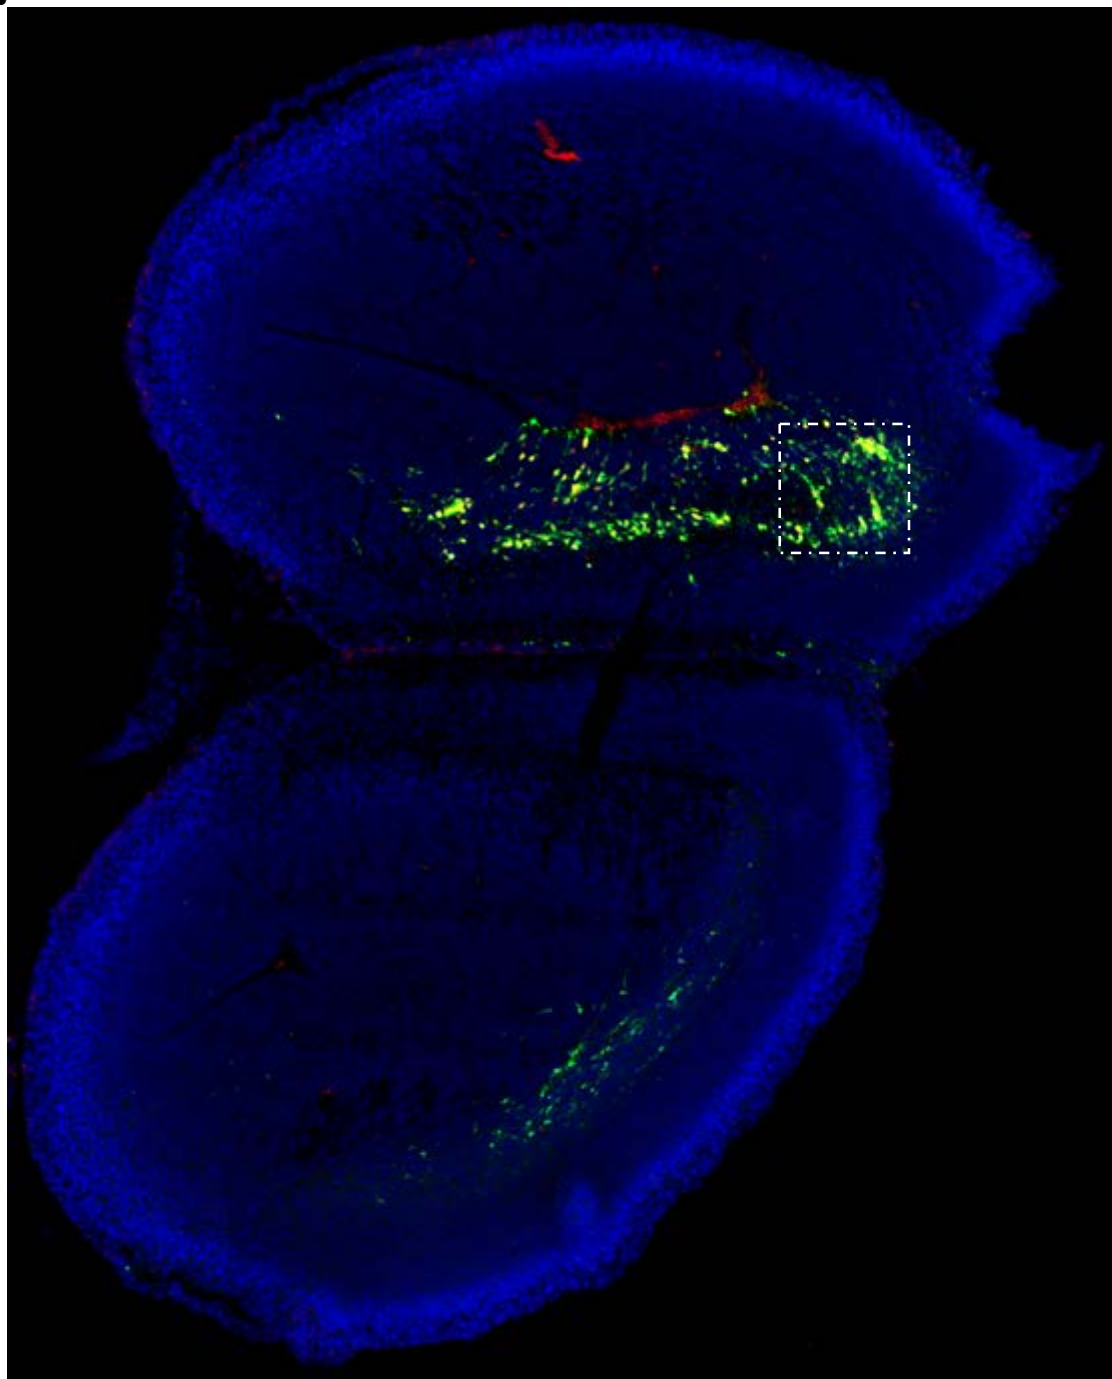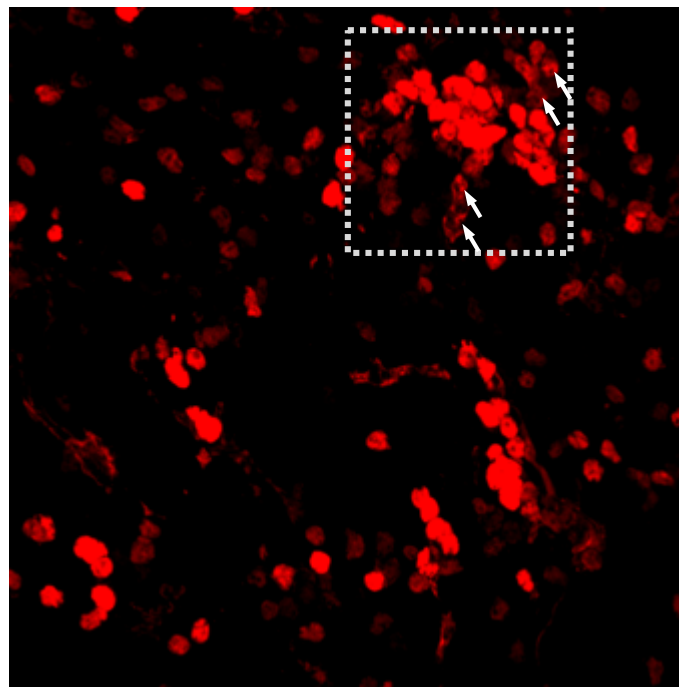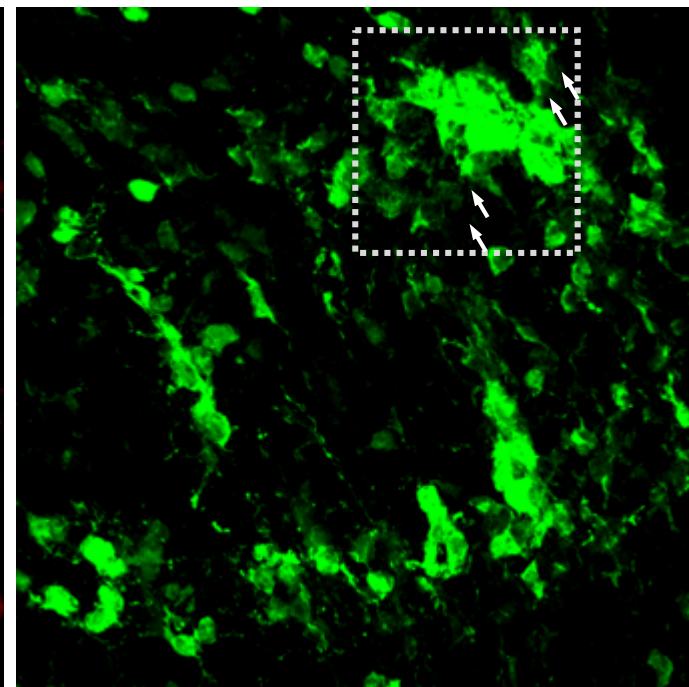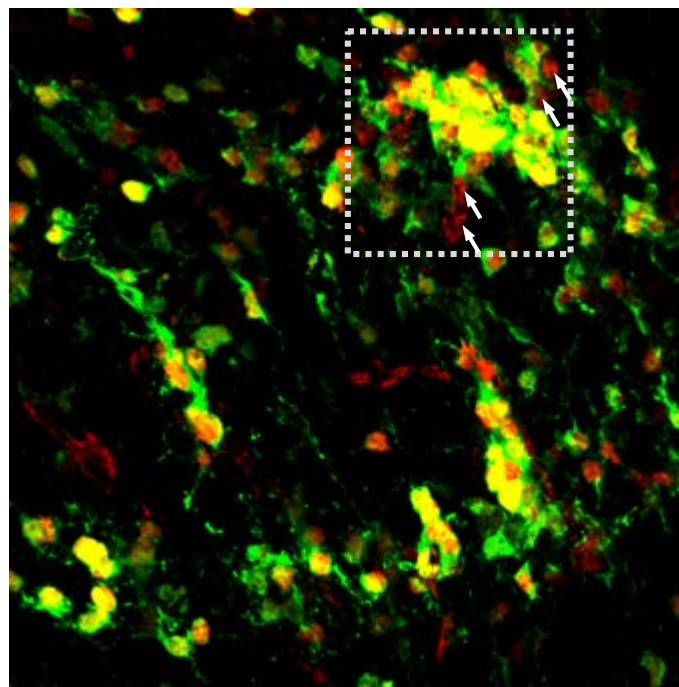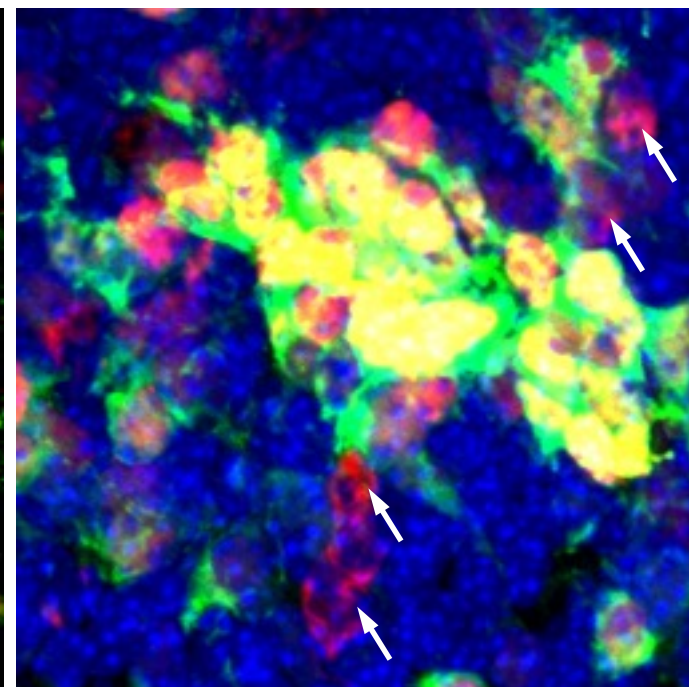

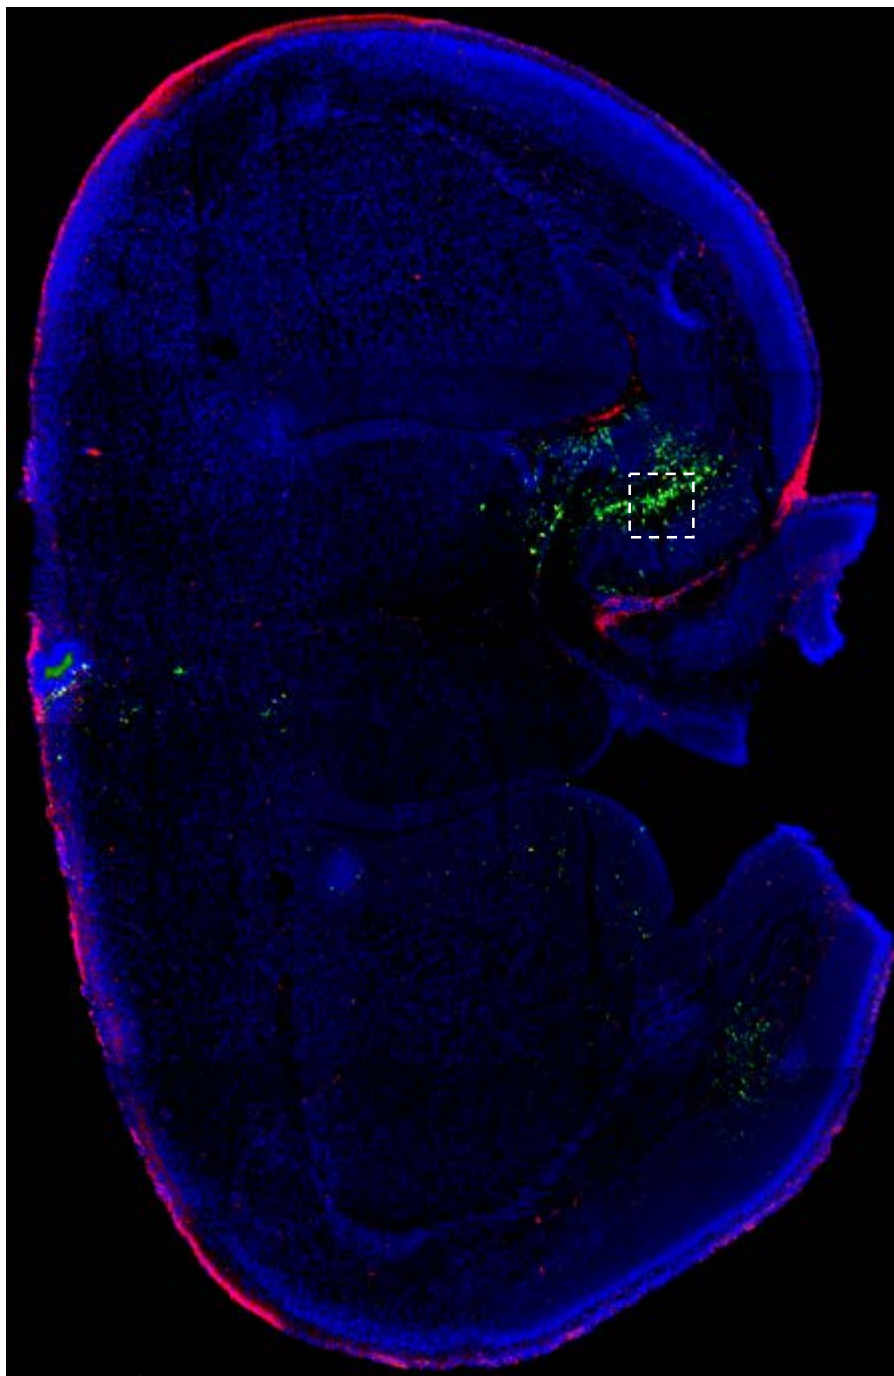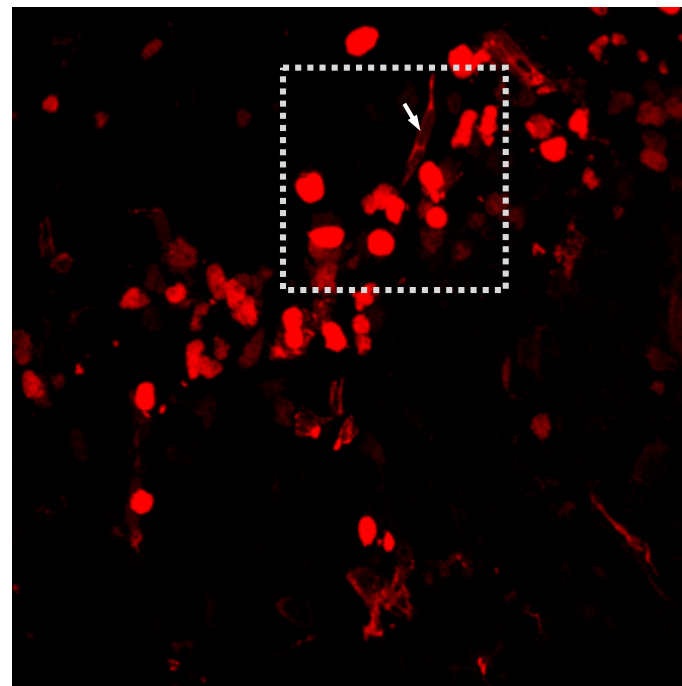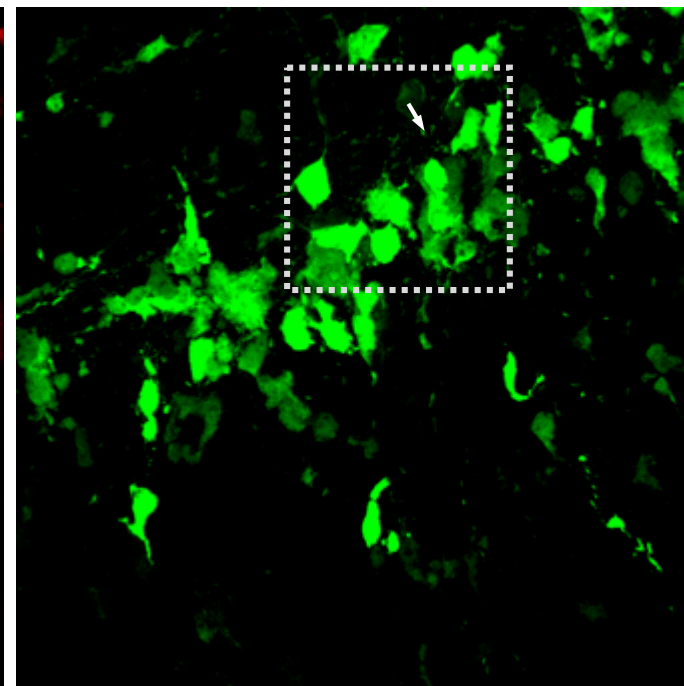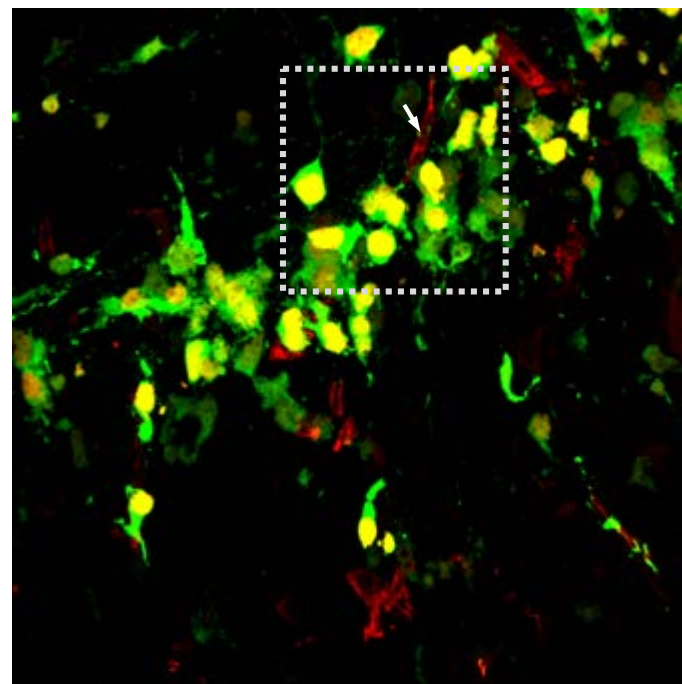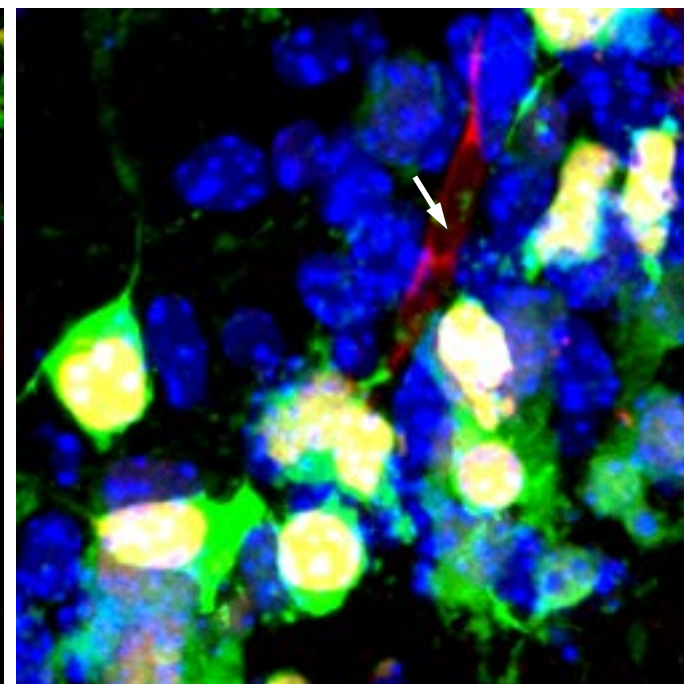

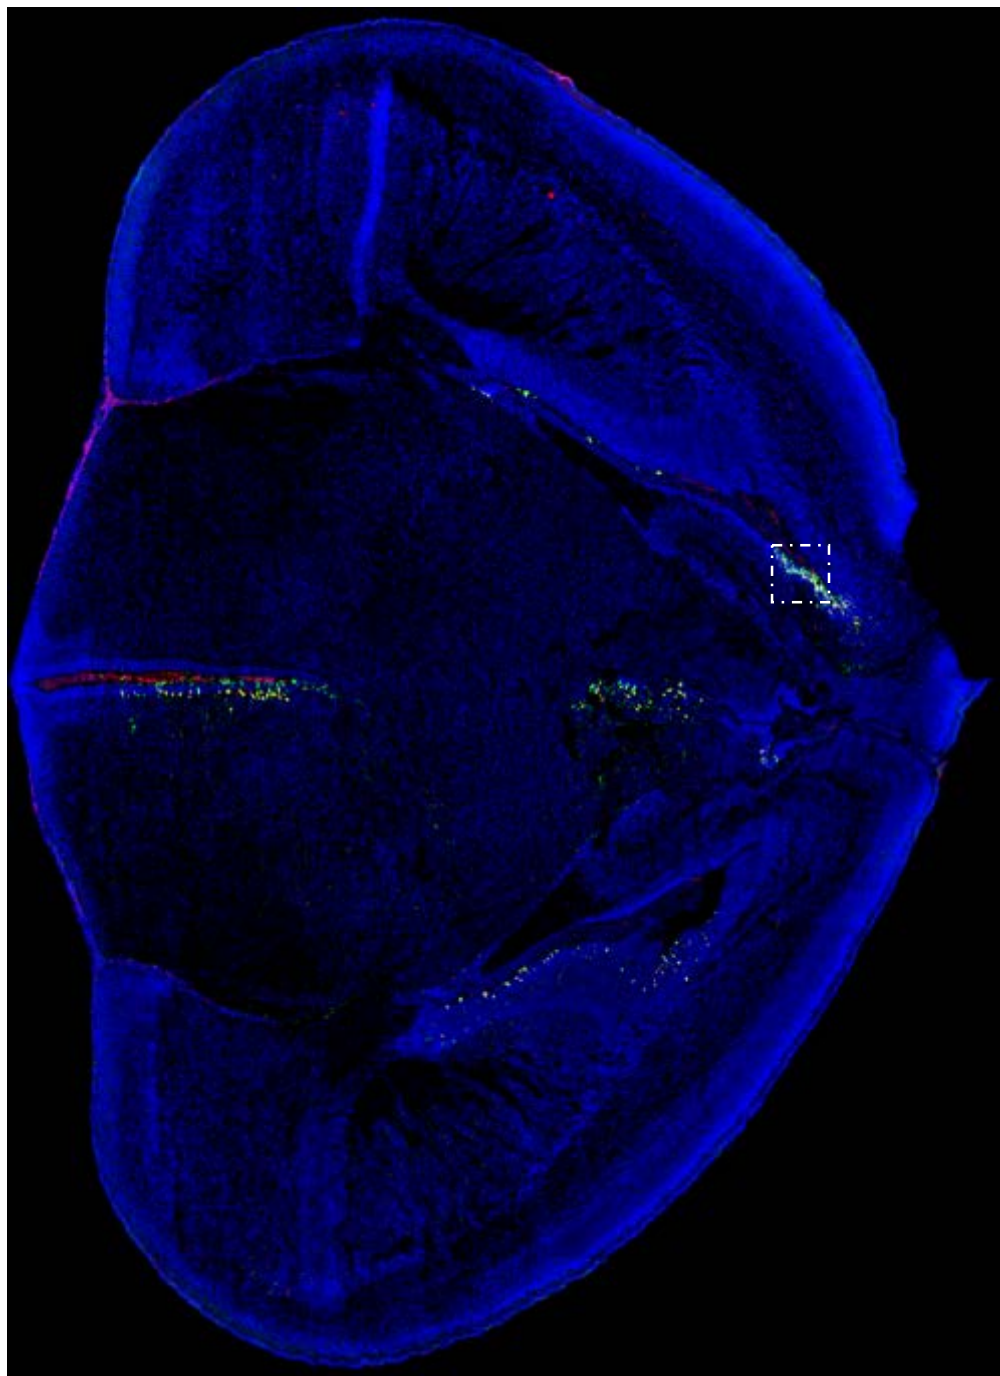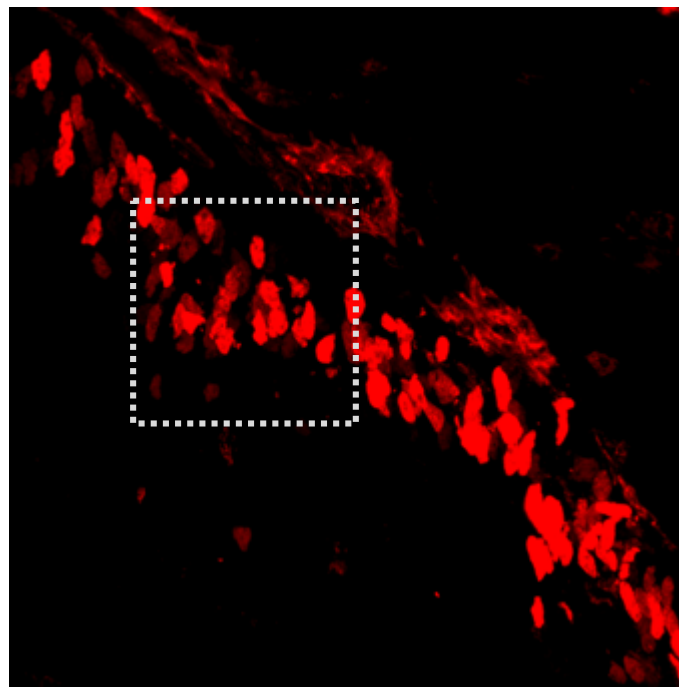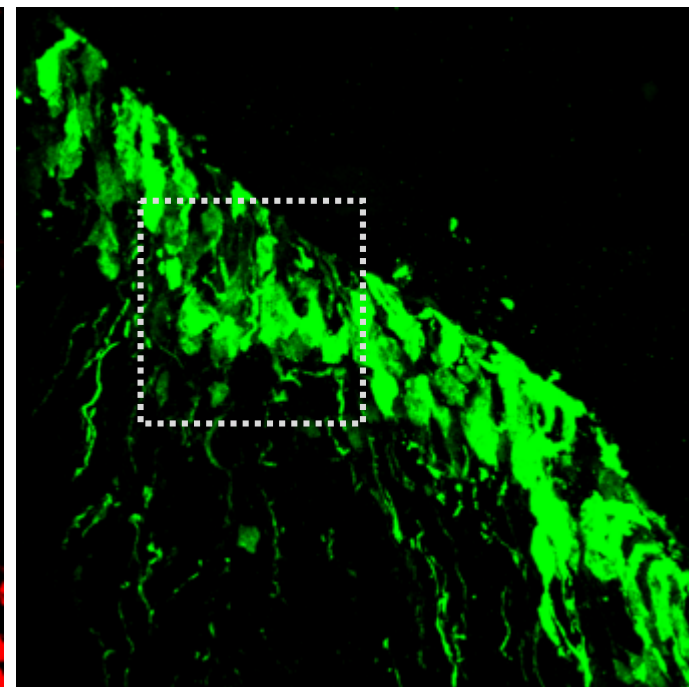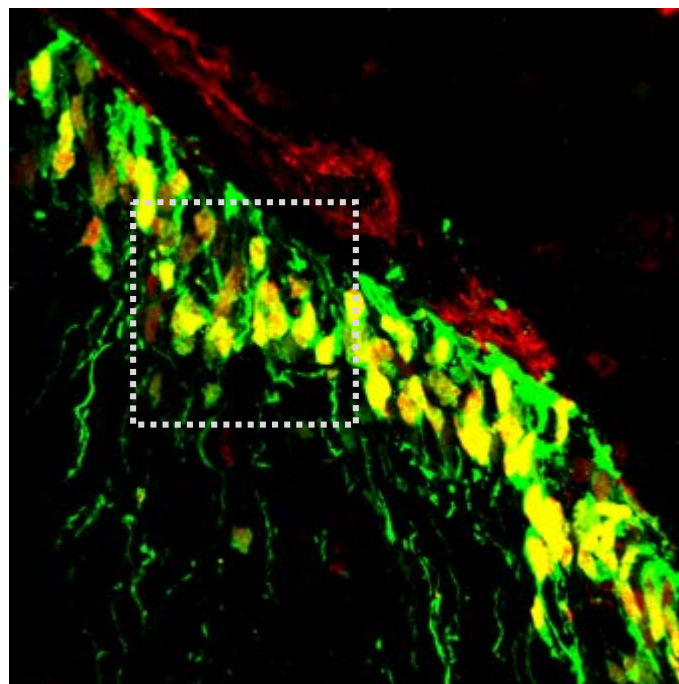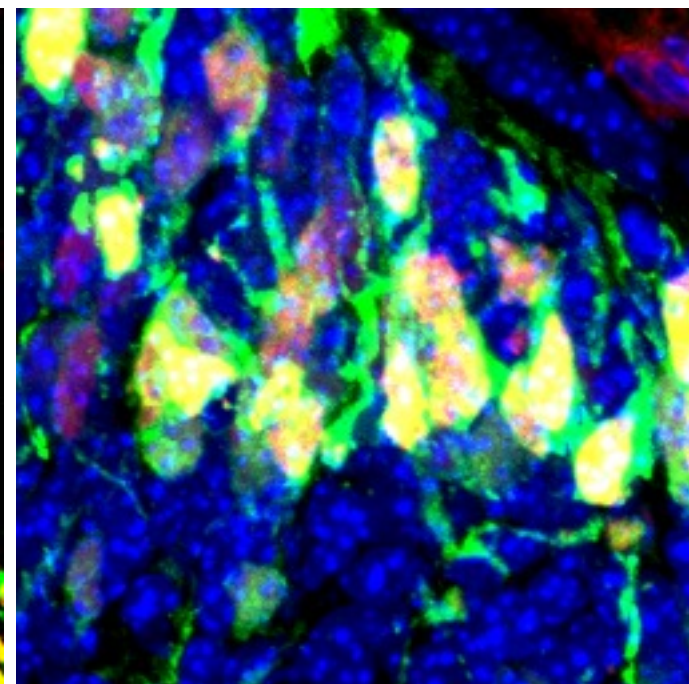

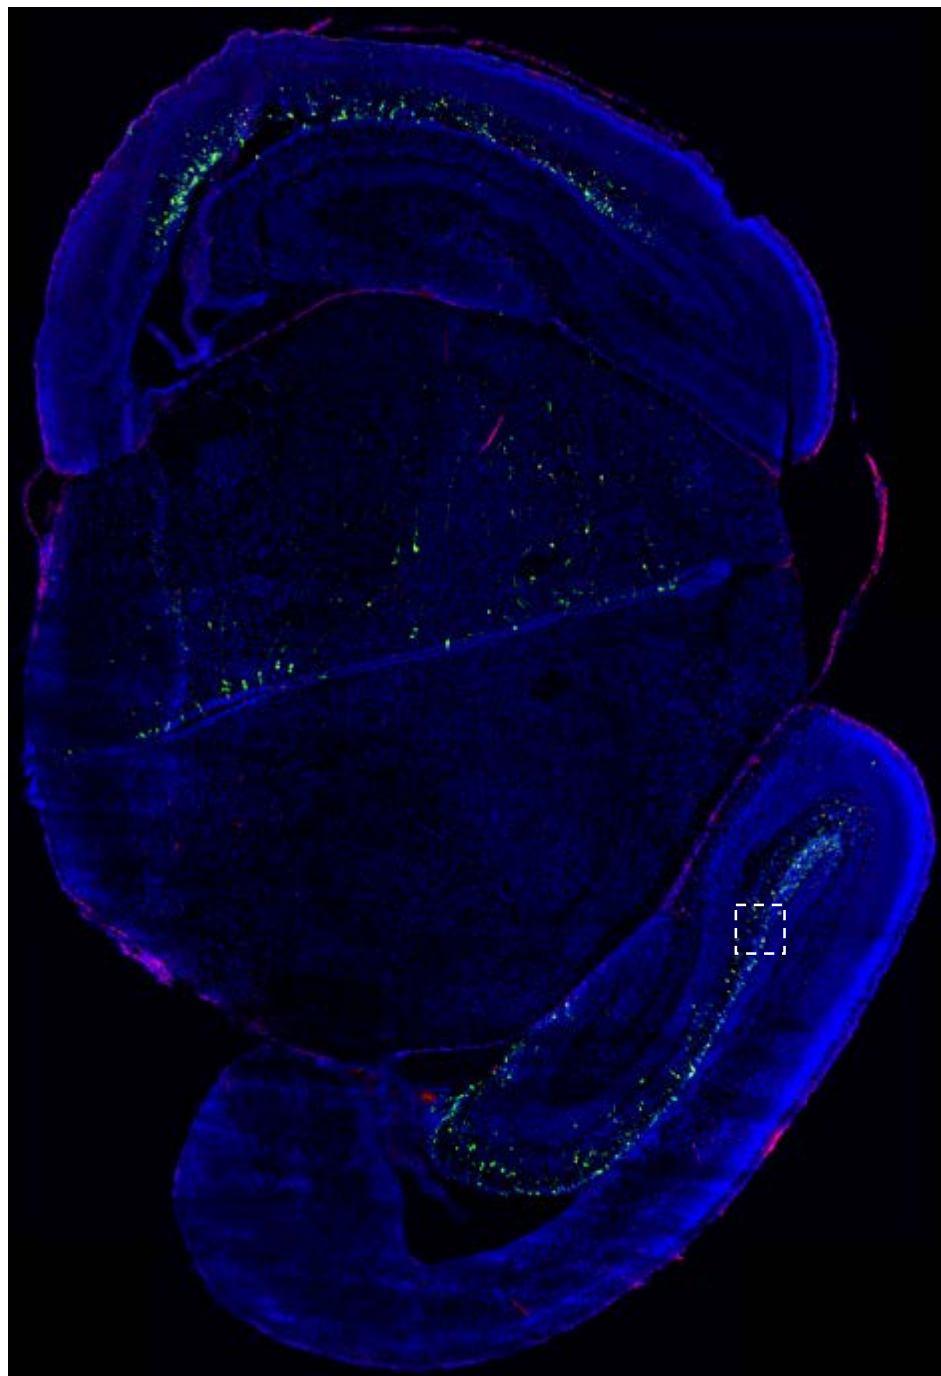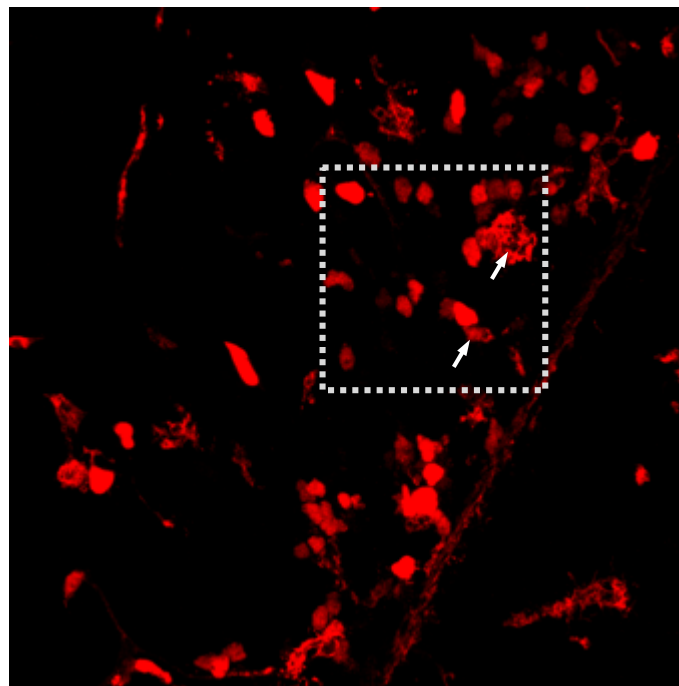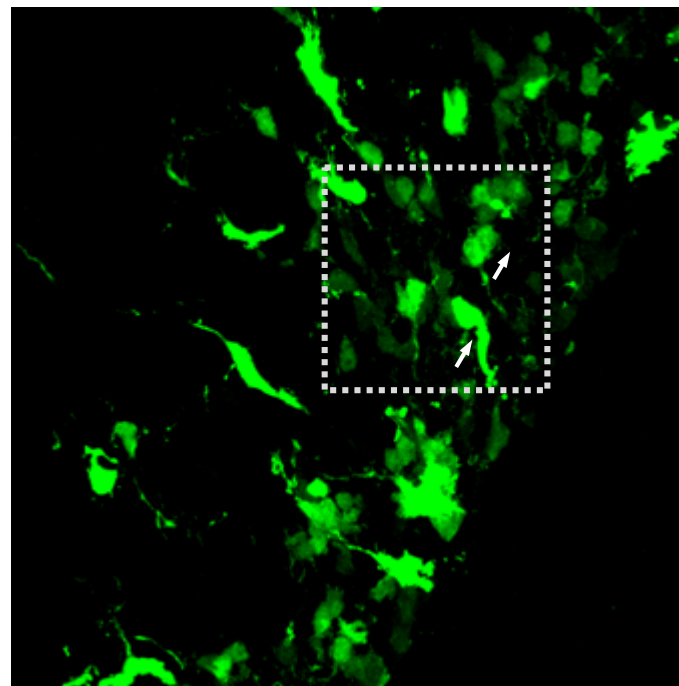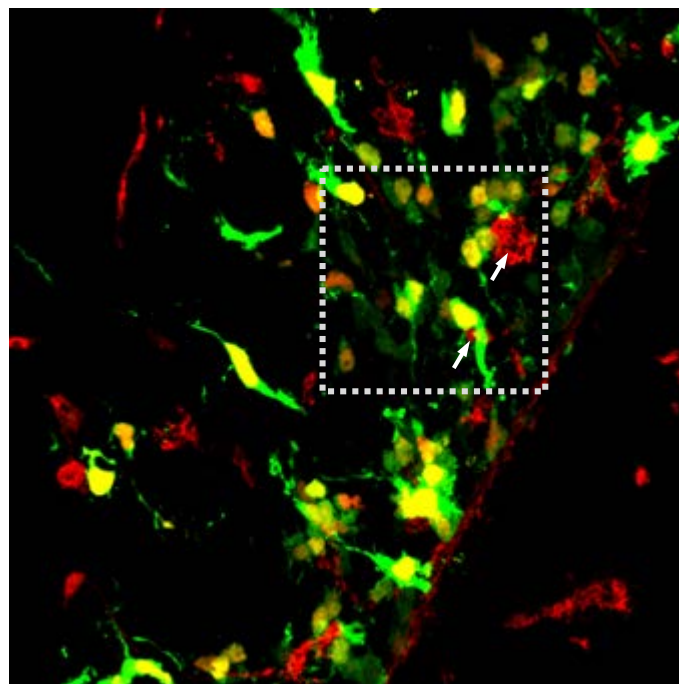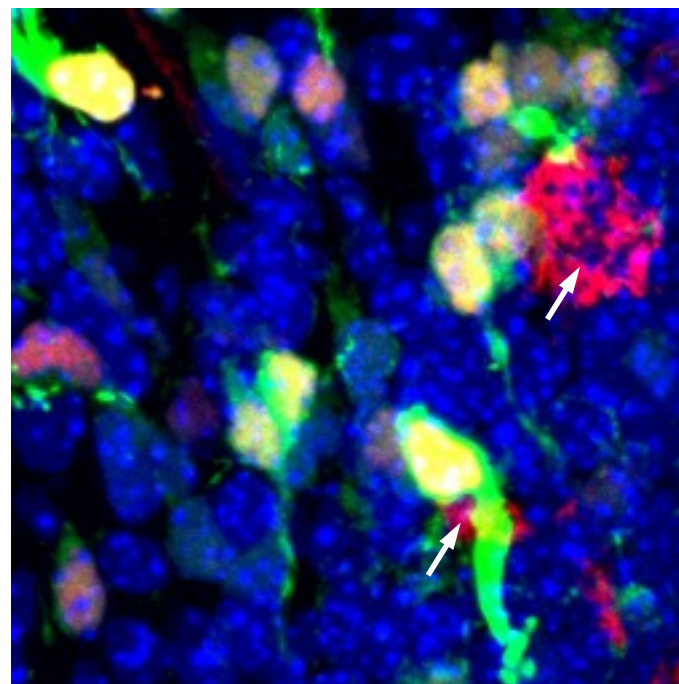

ej137. POU5F1

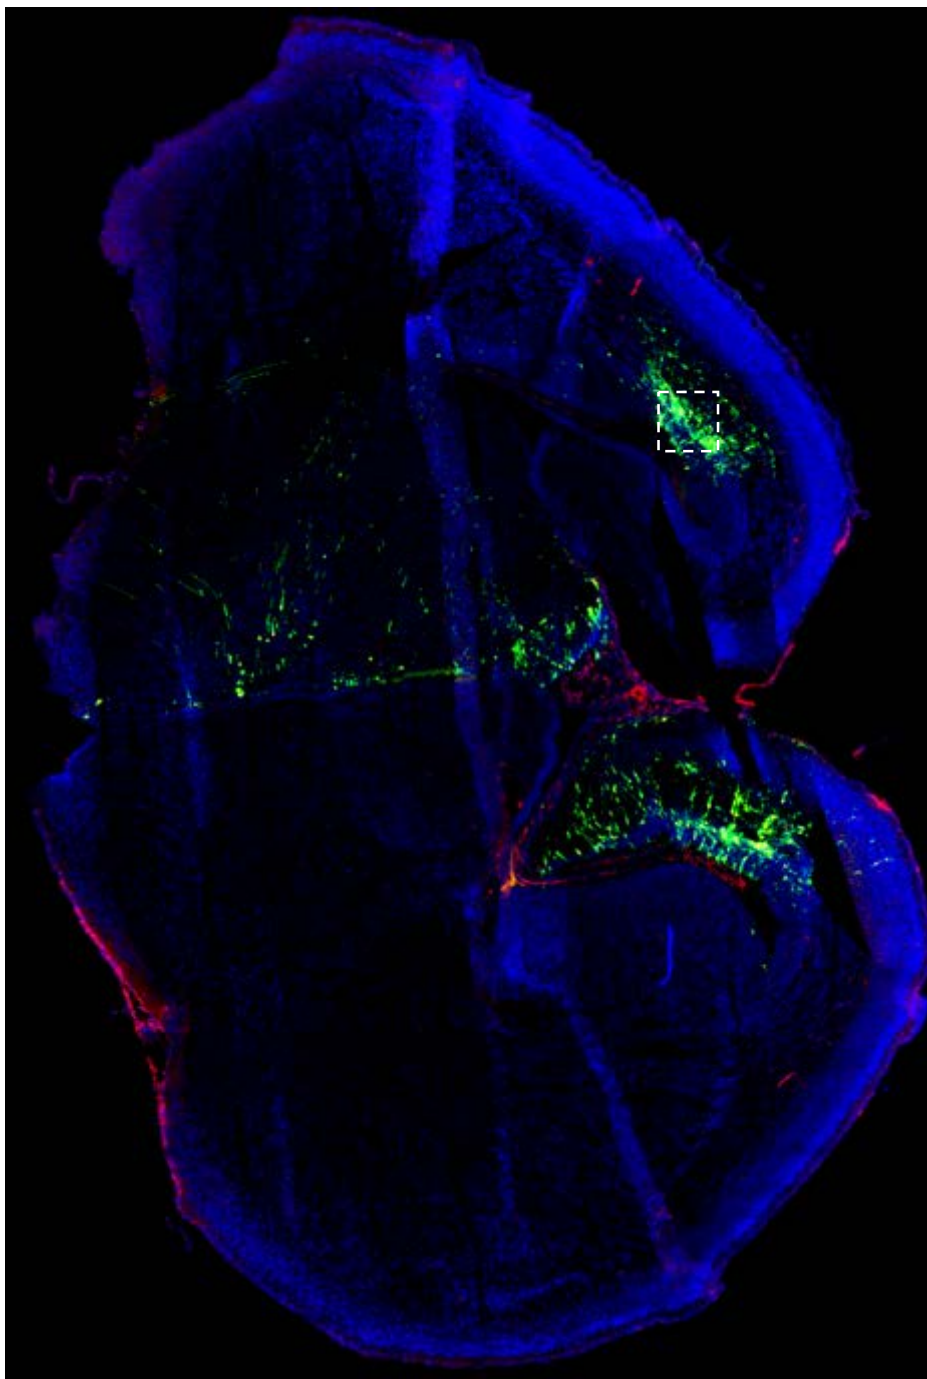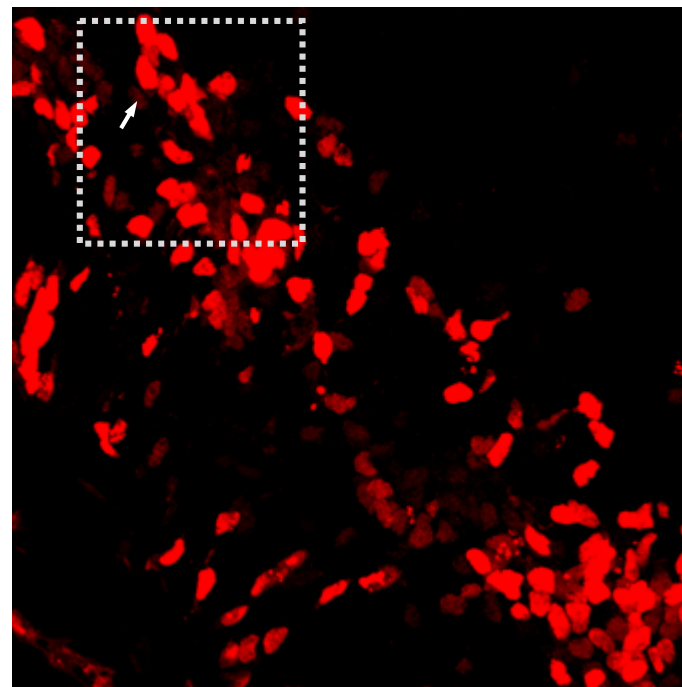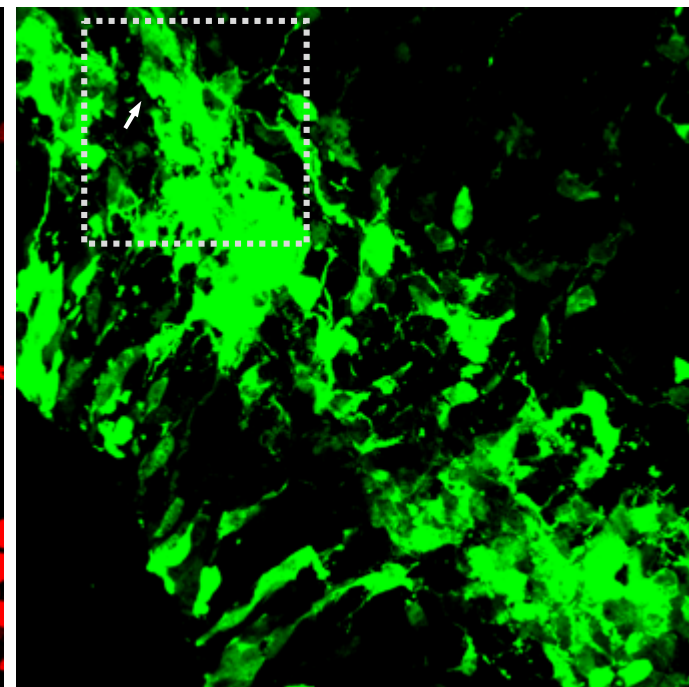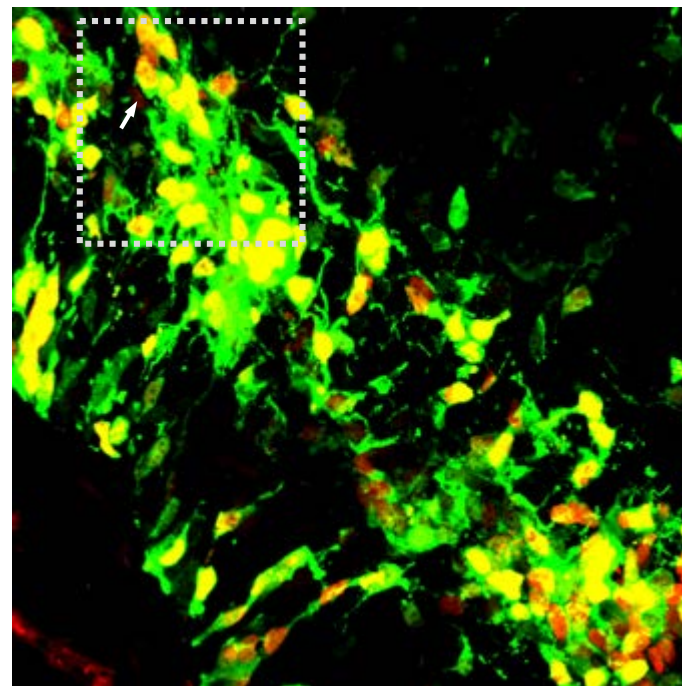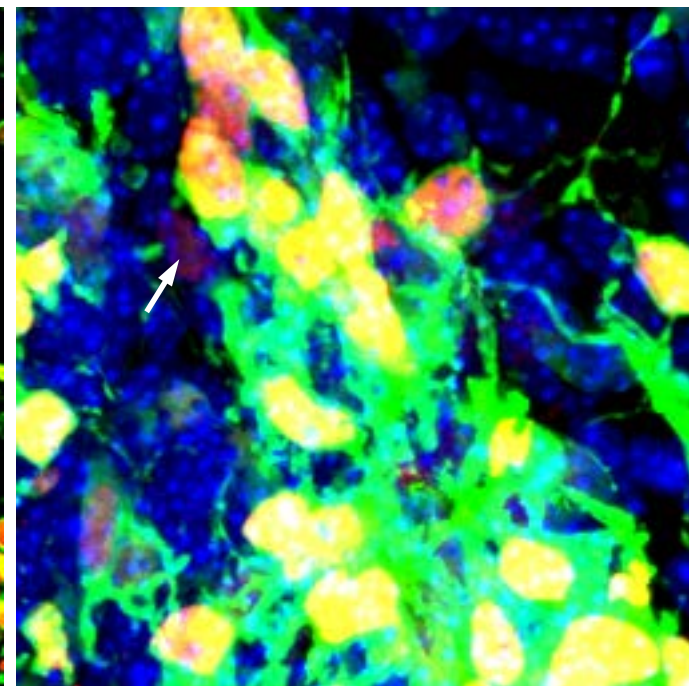

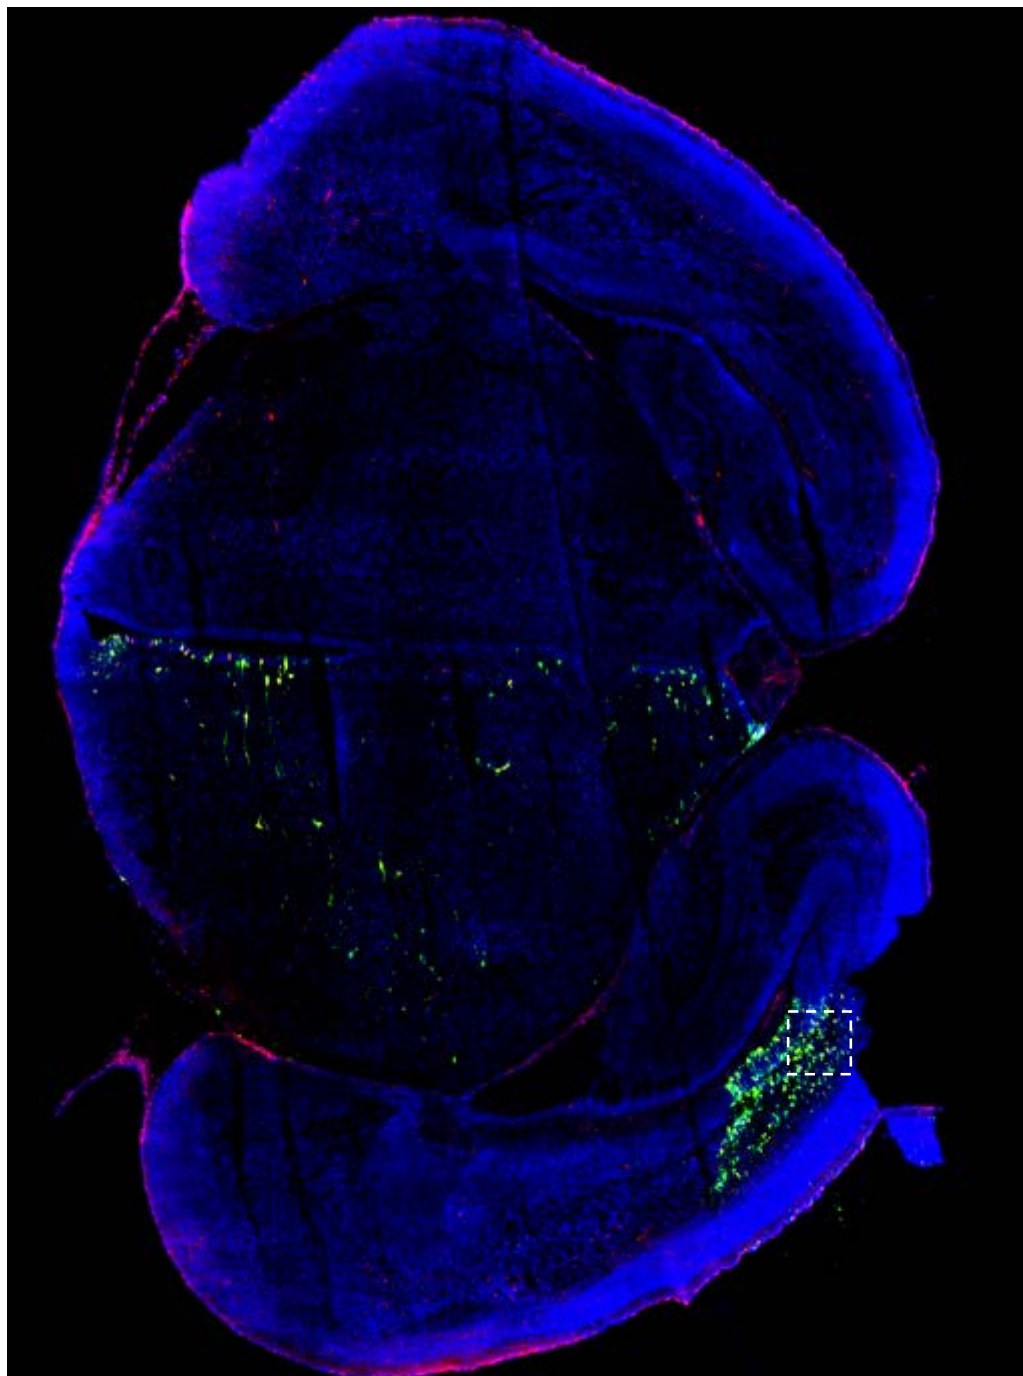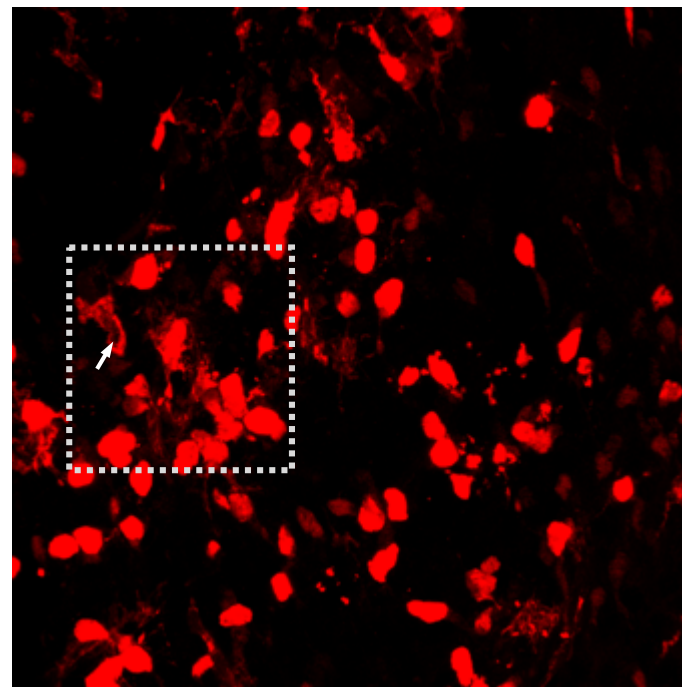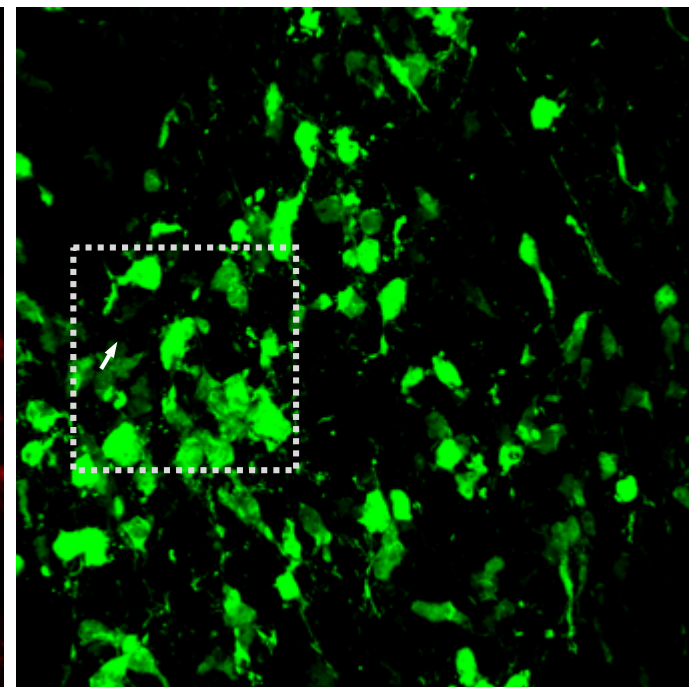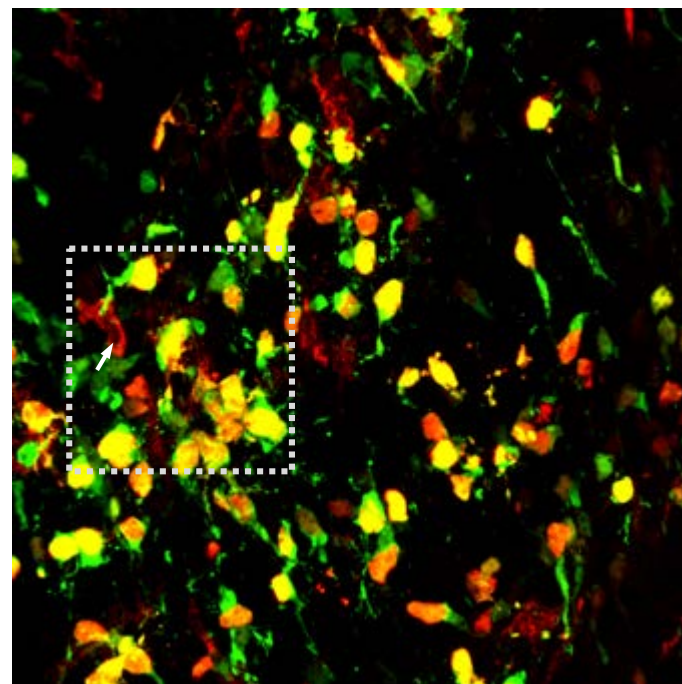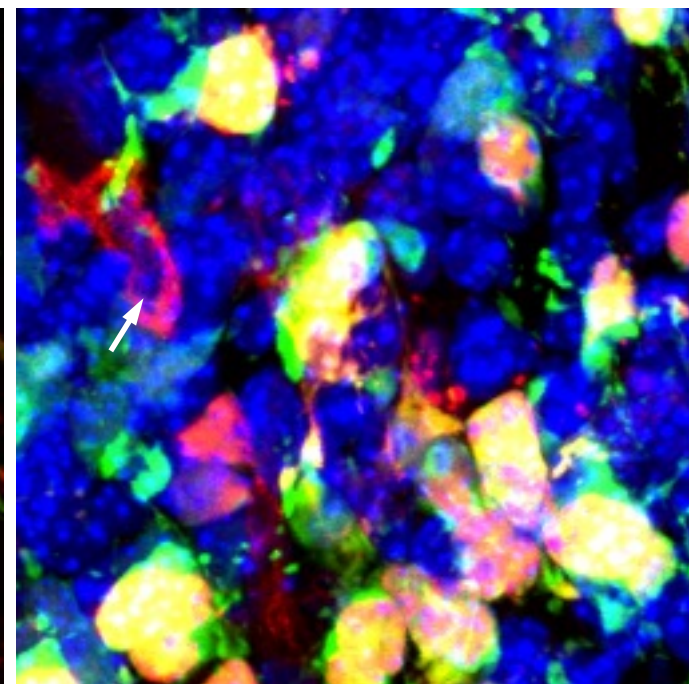

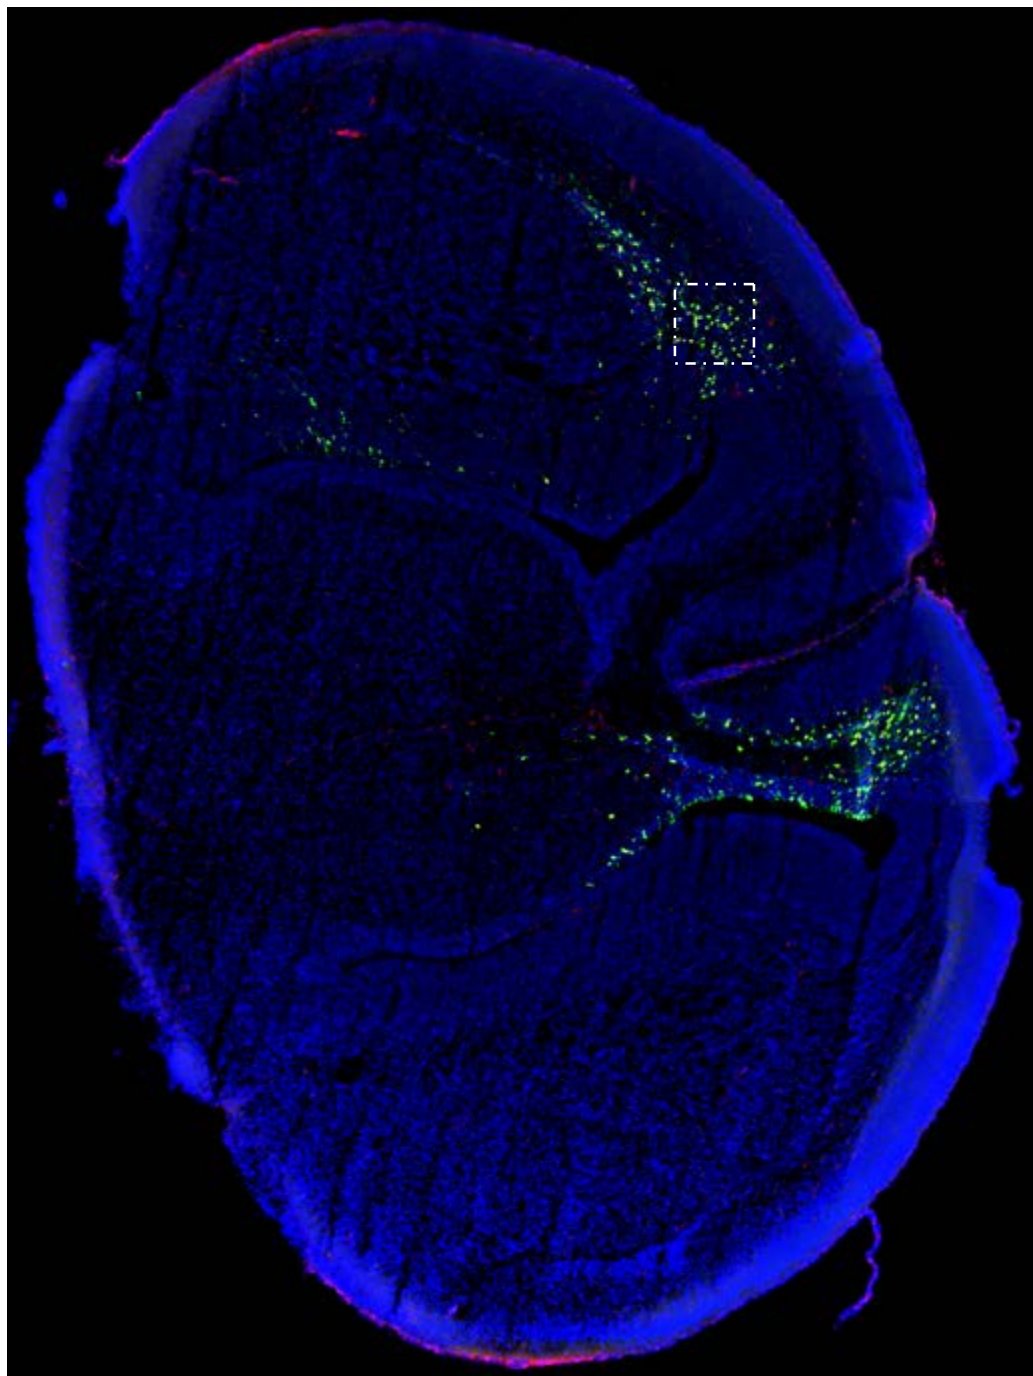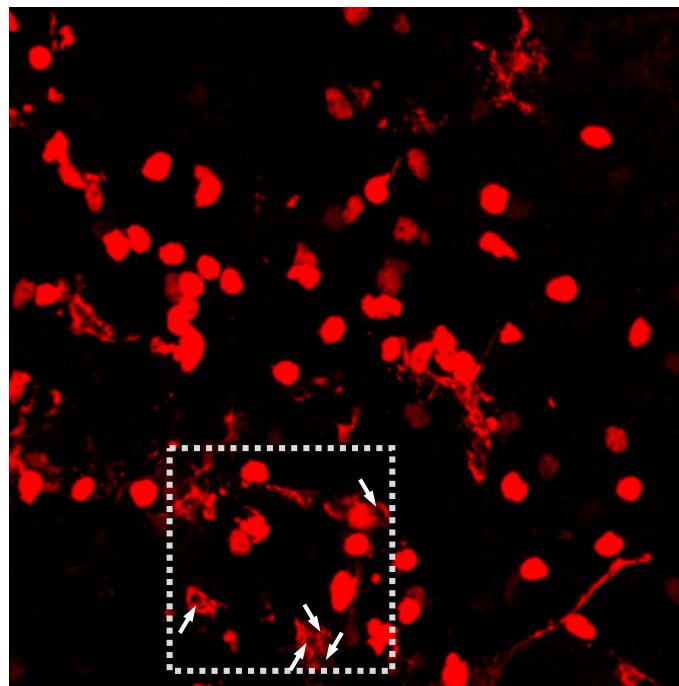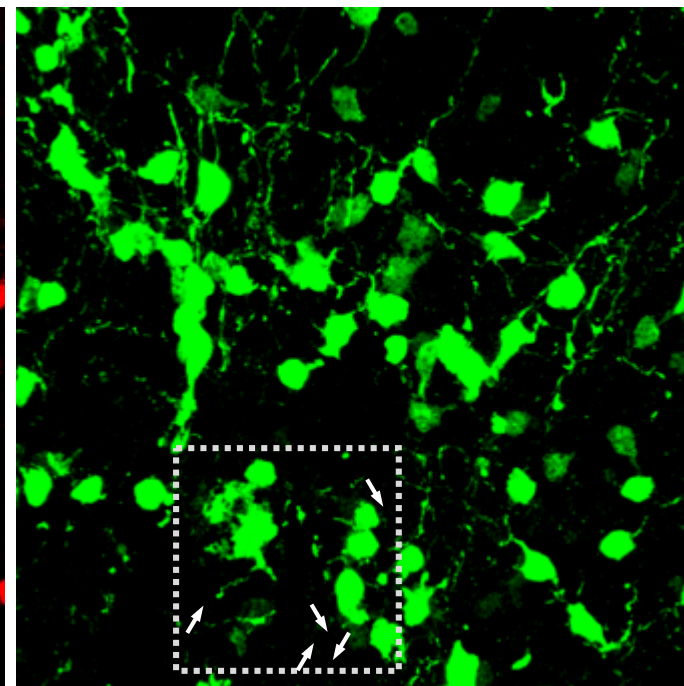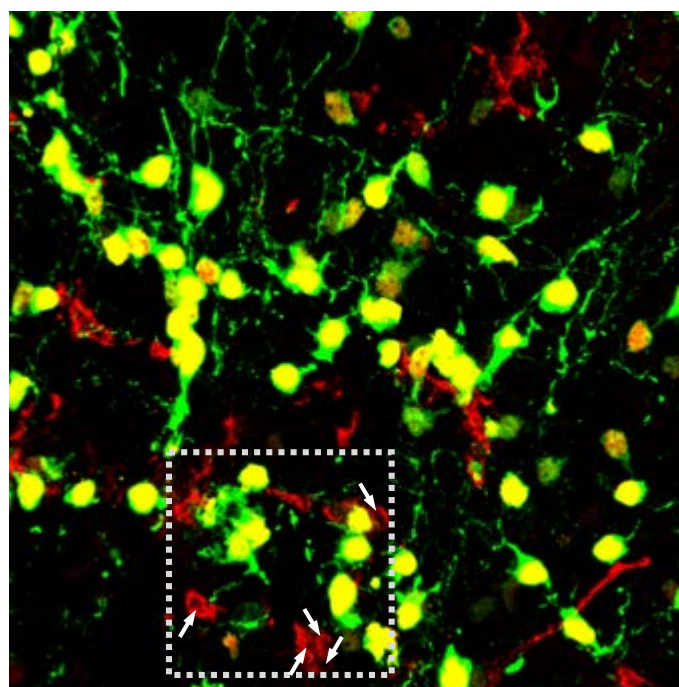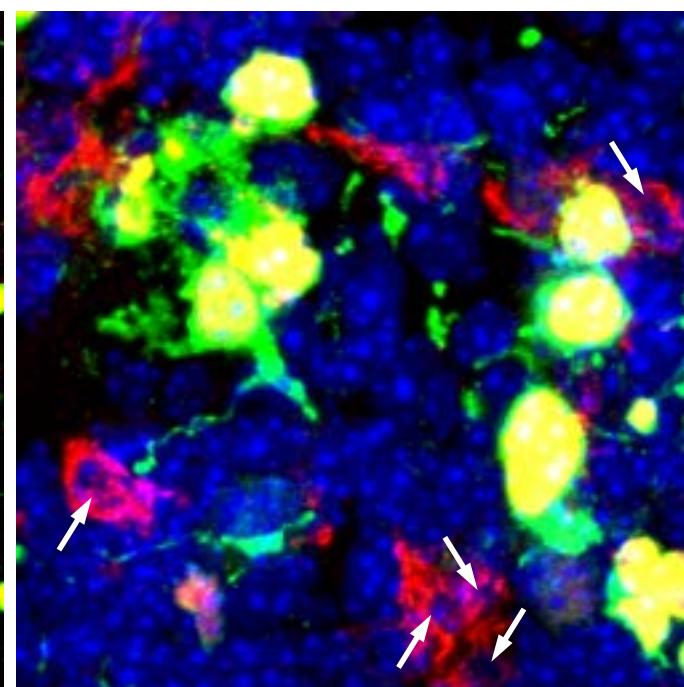

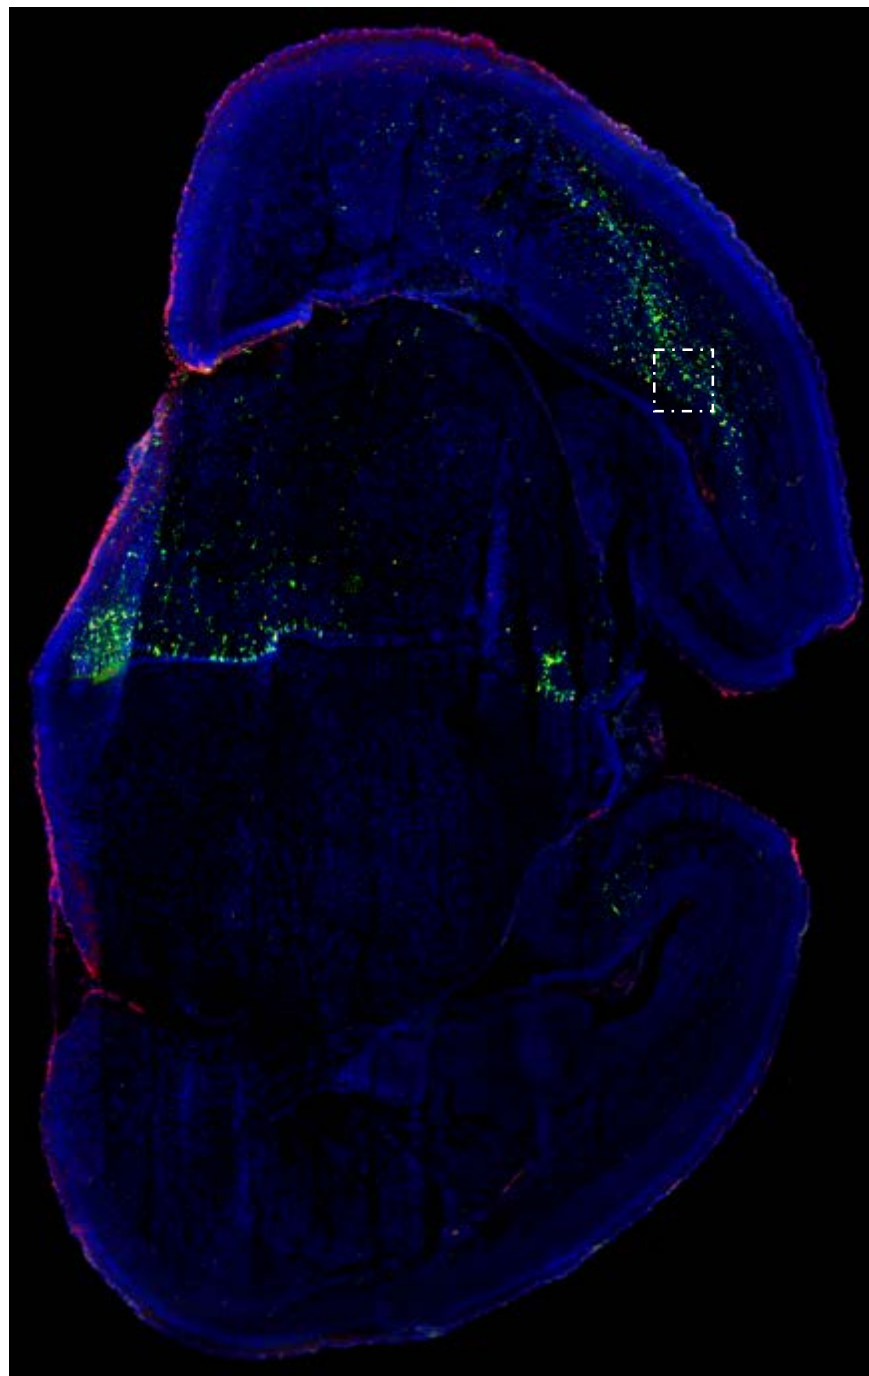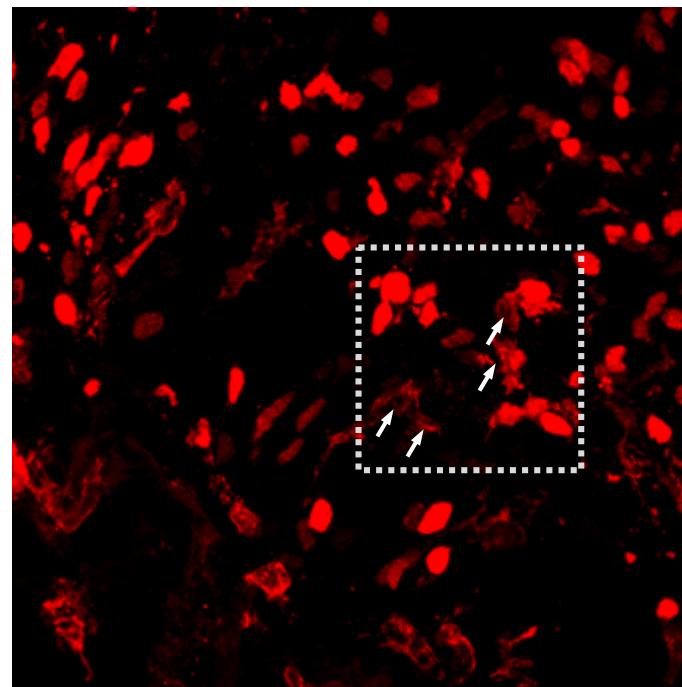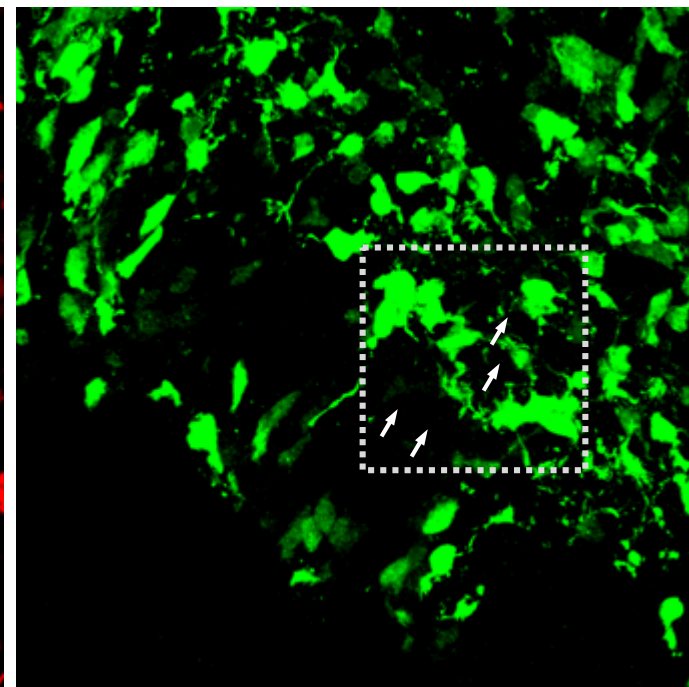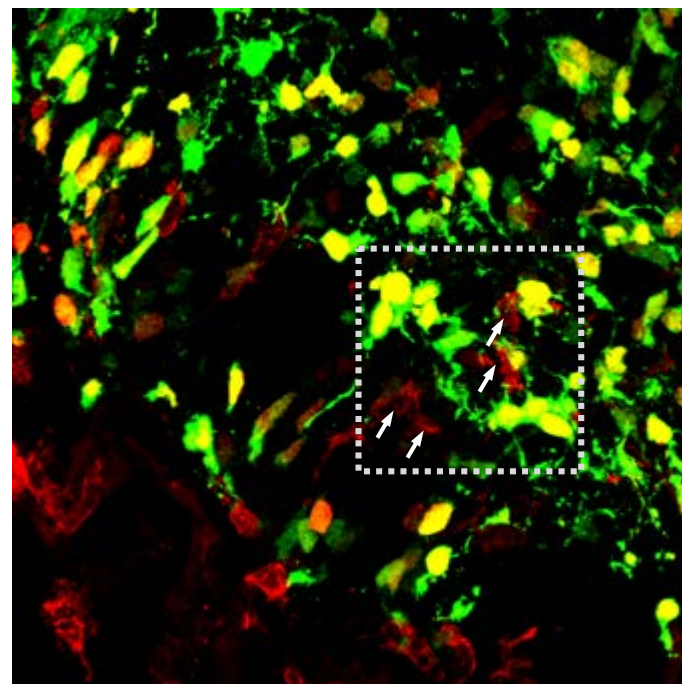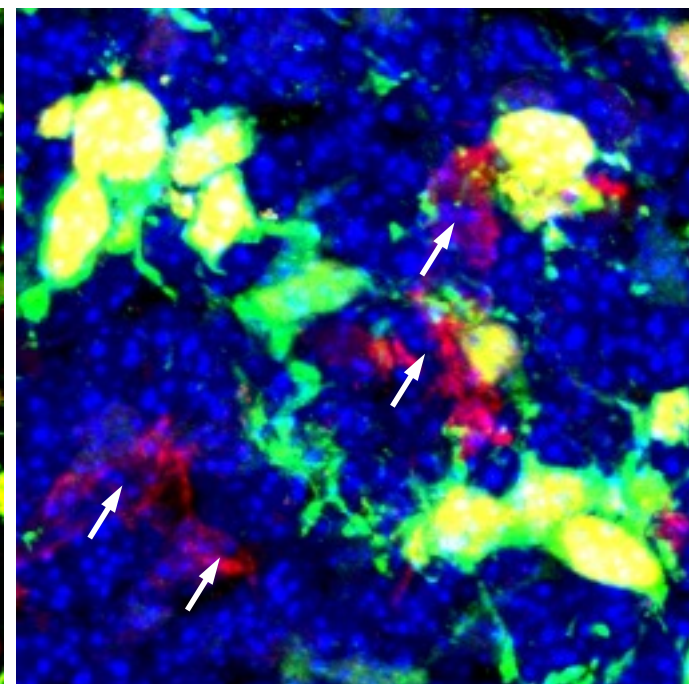

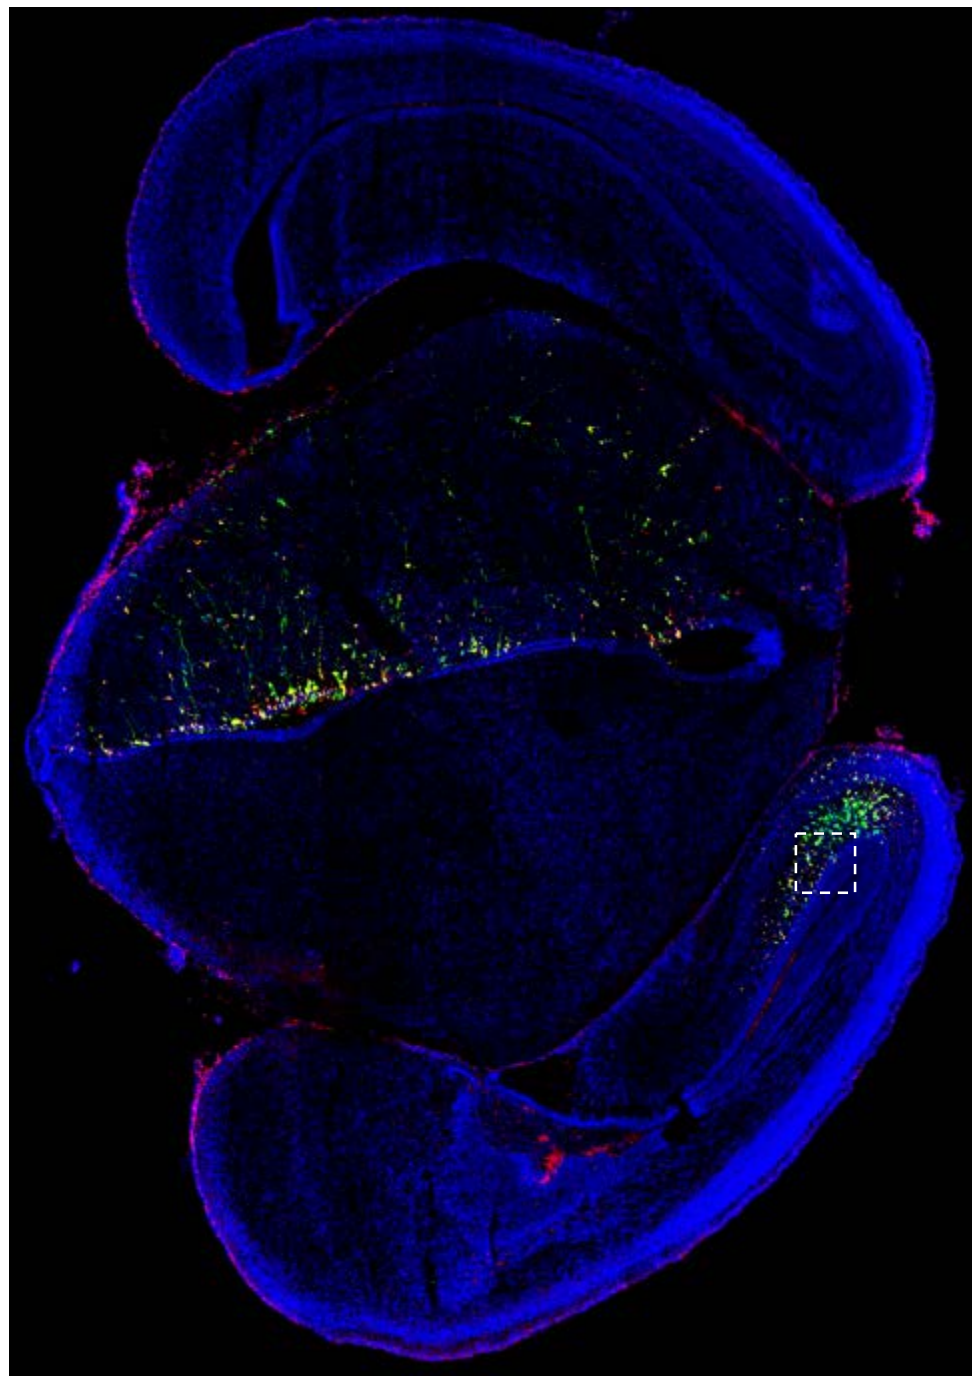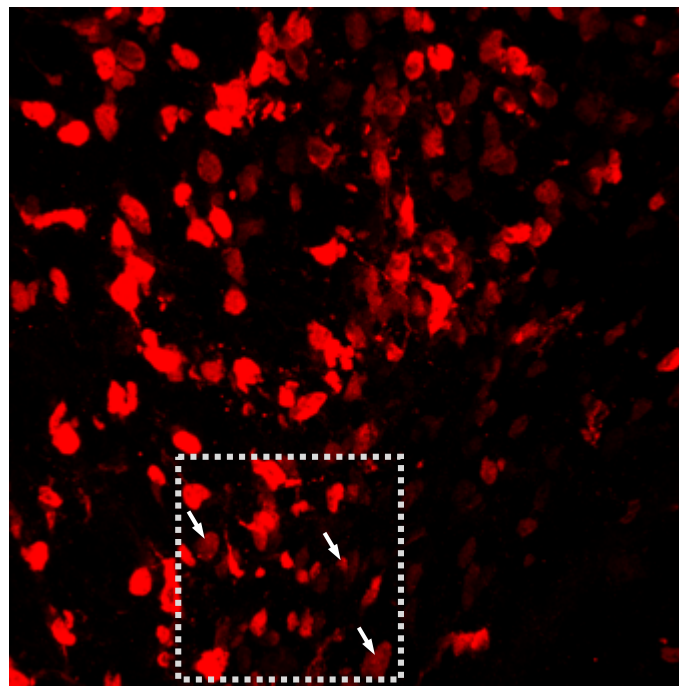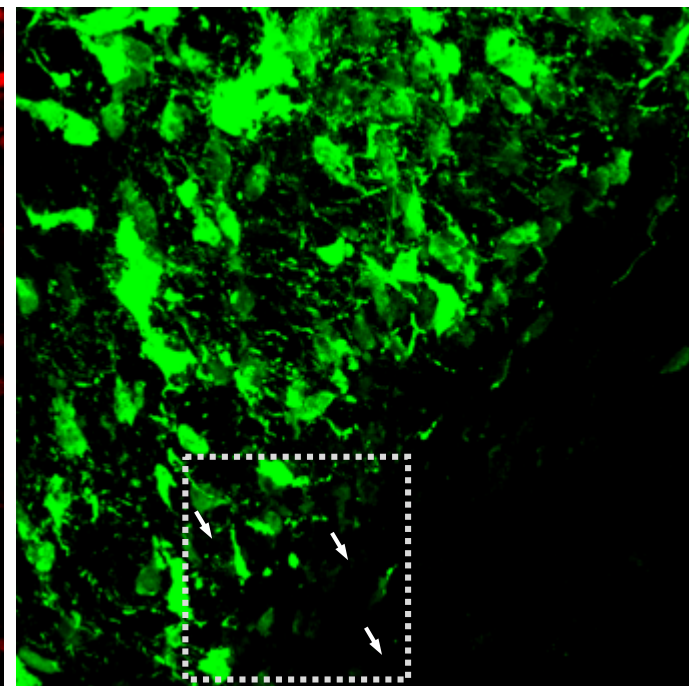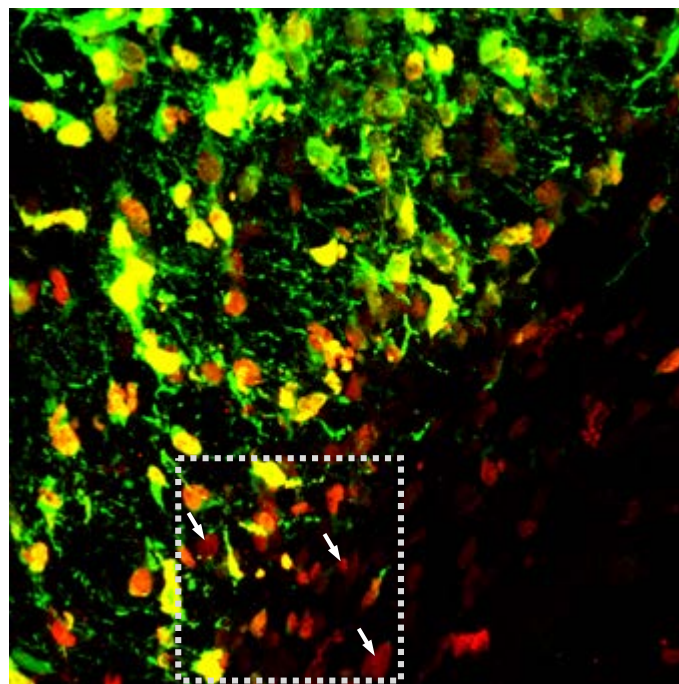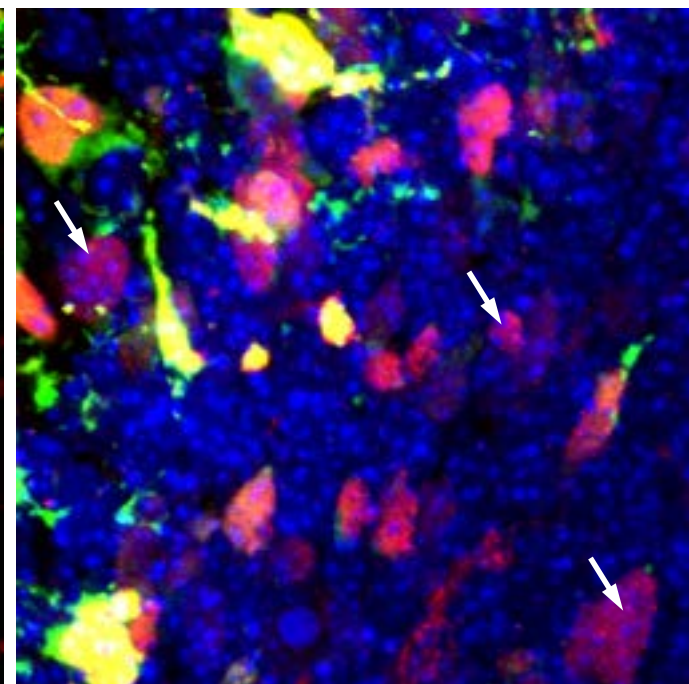

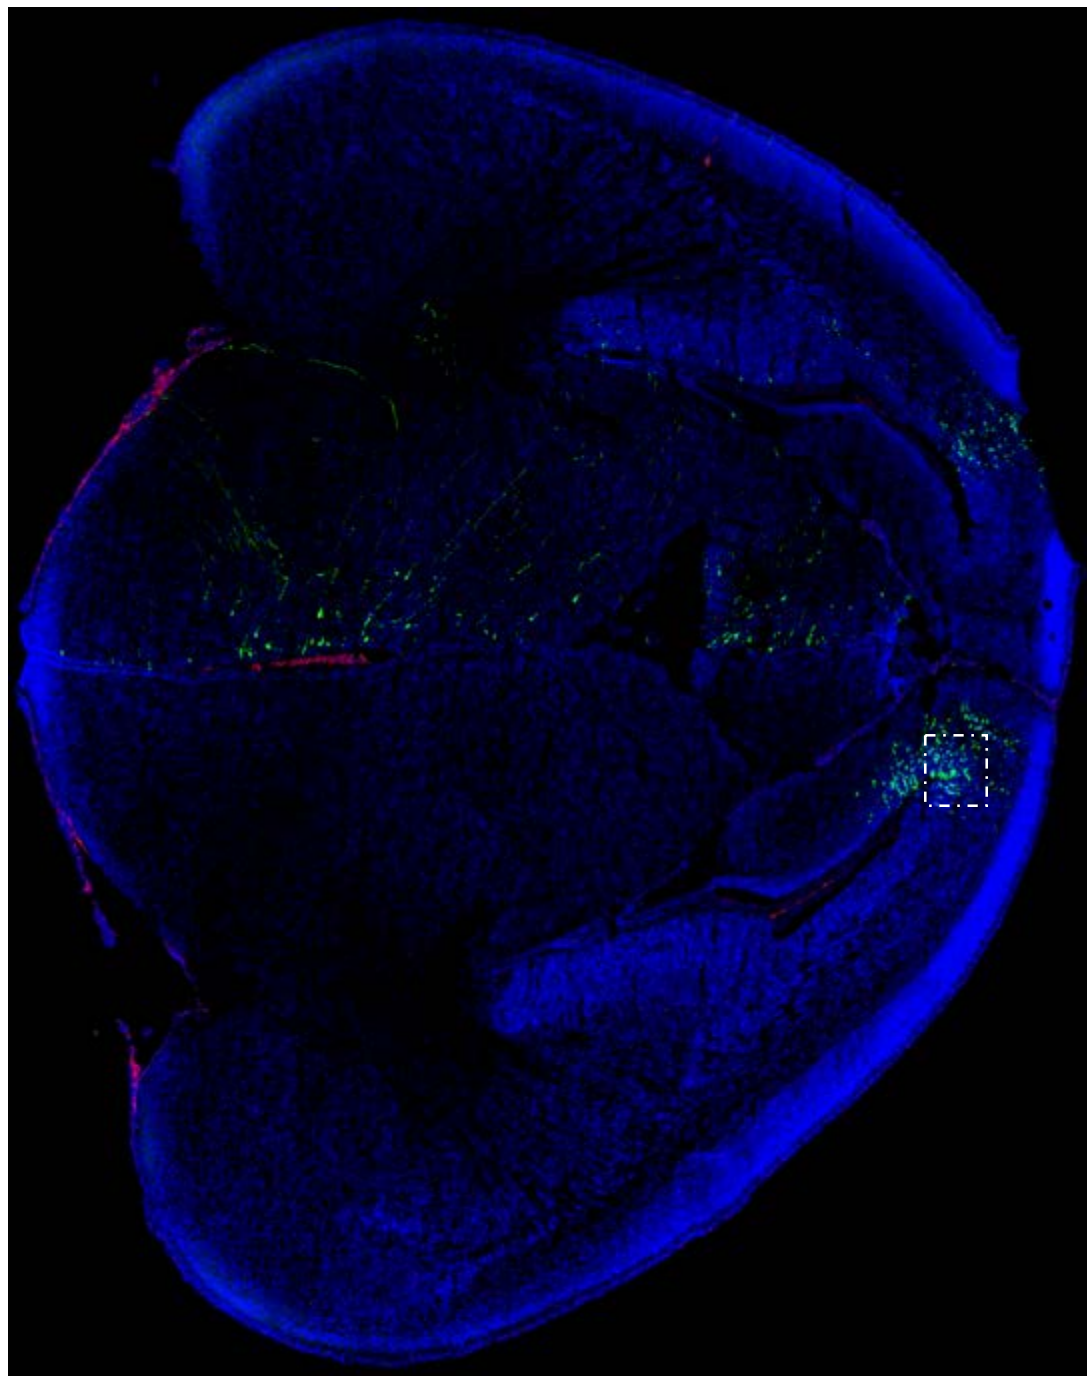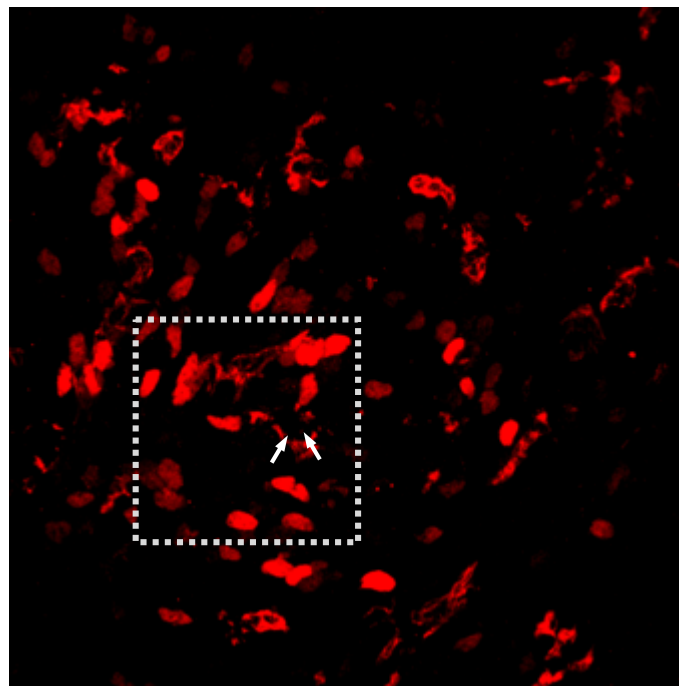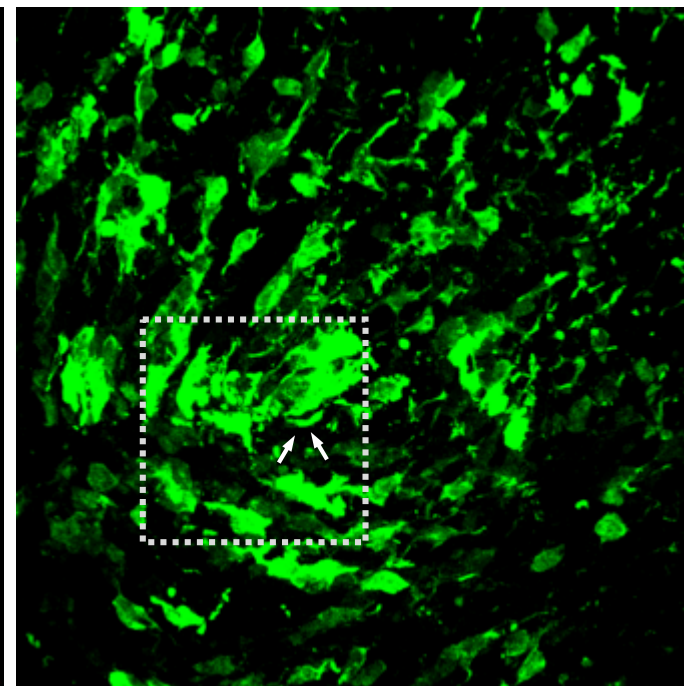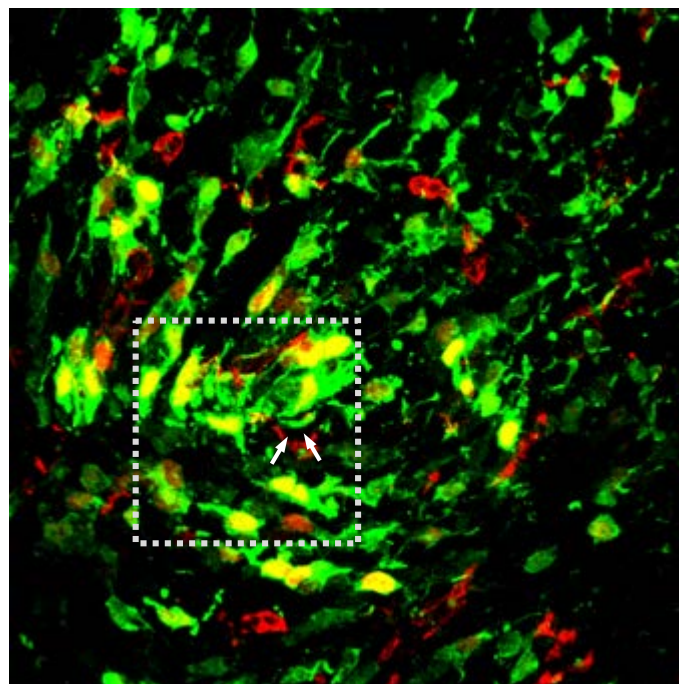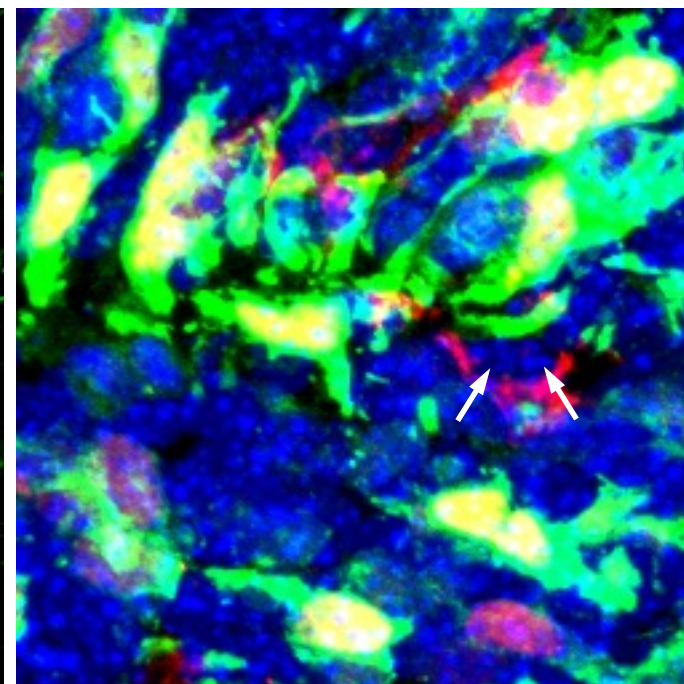

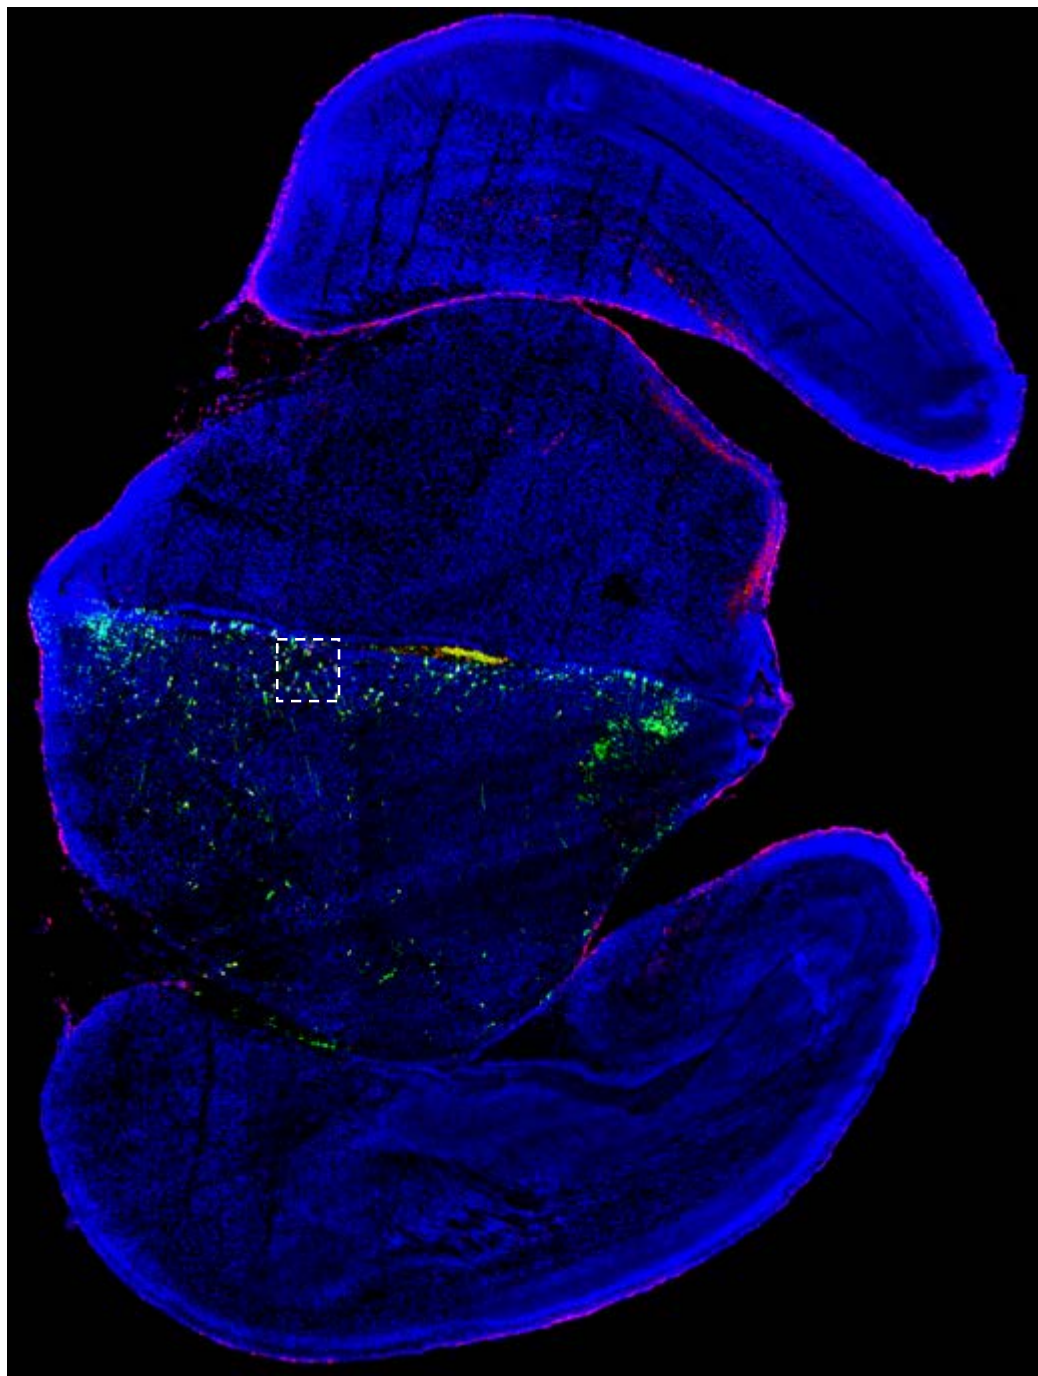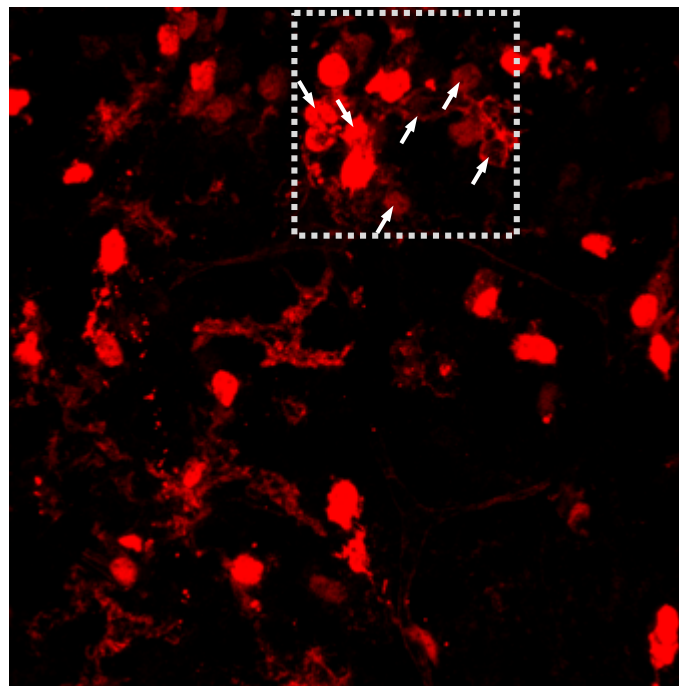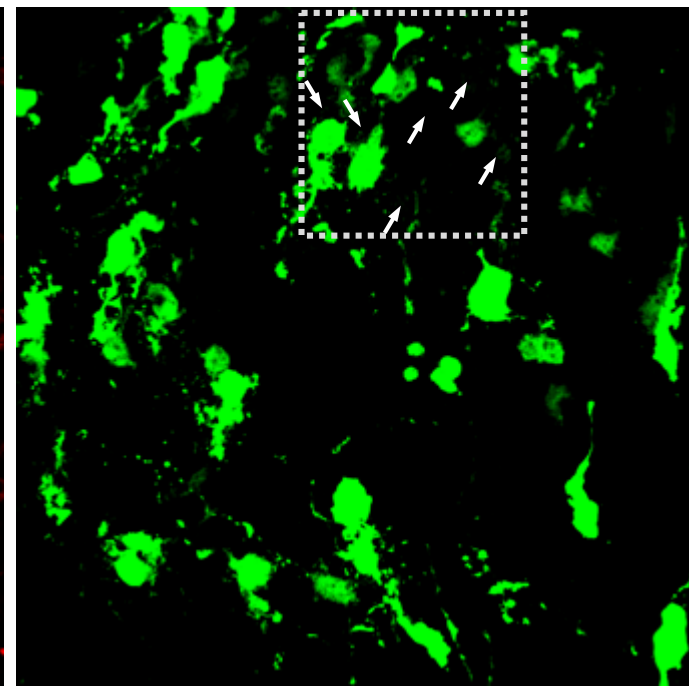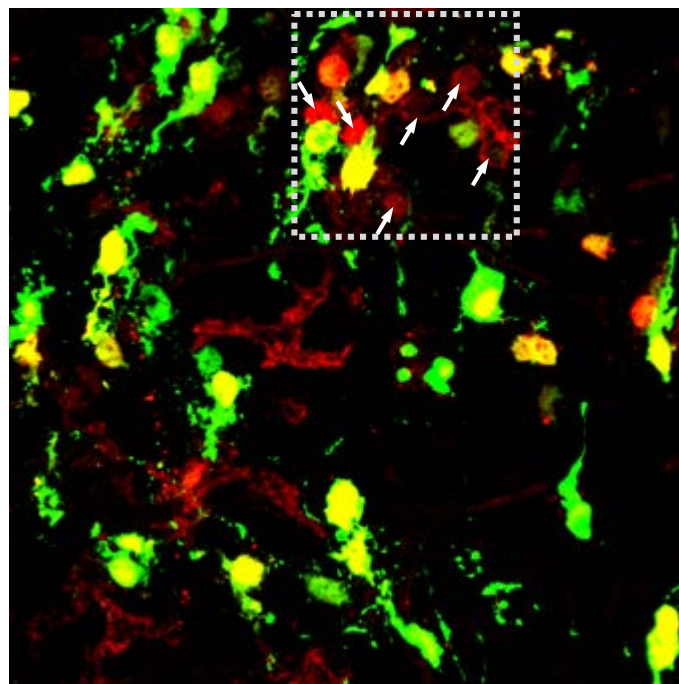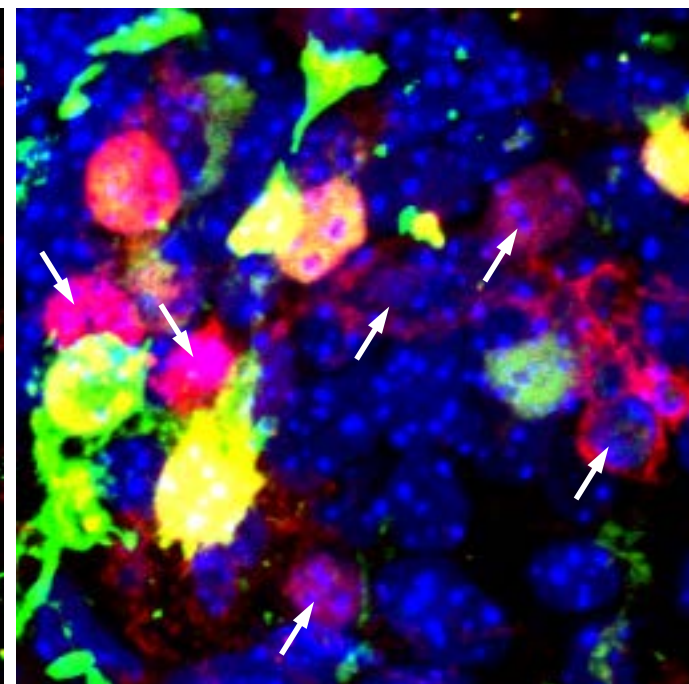

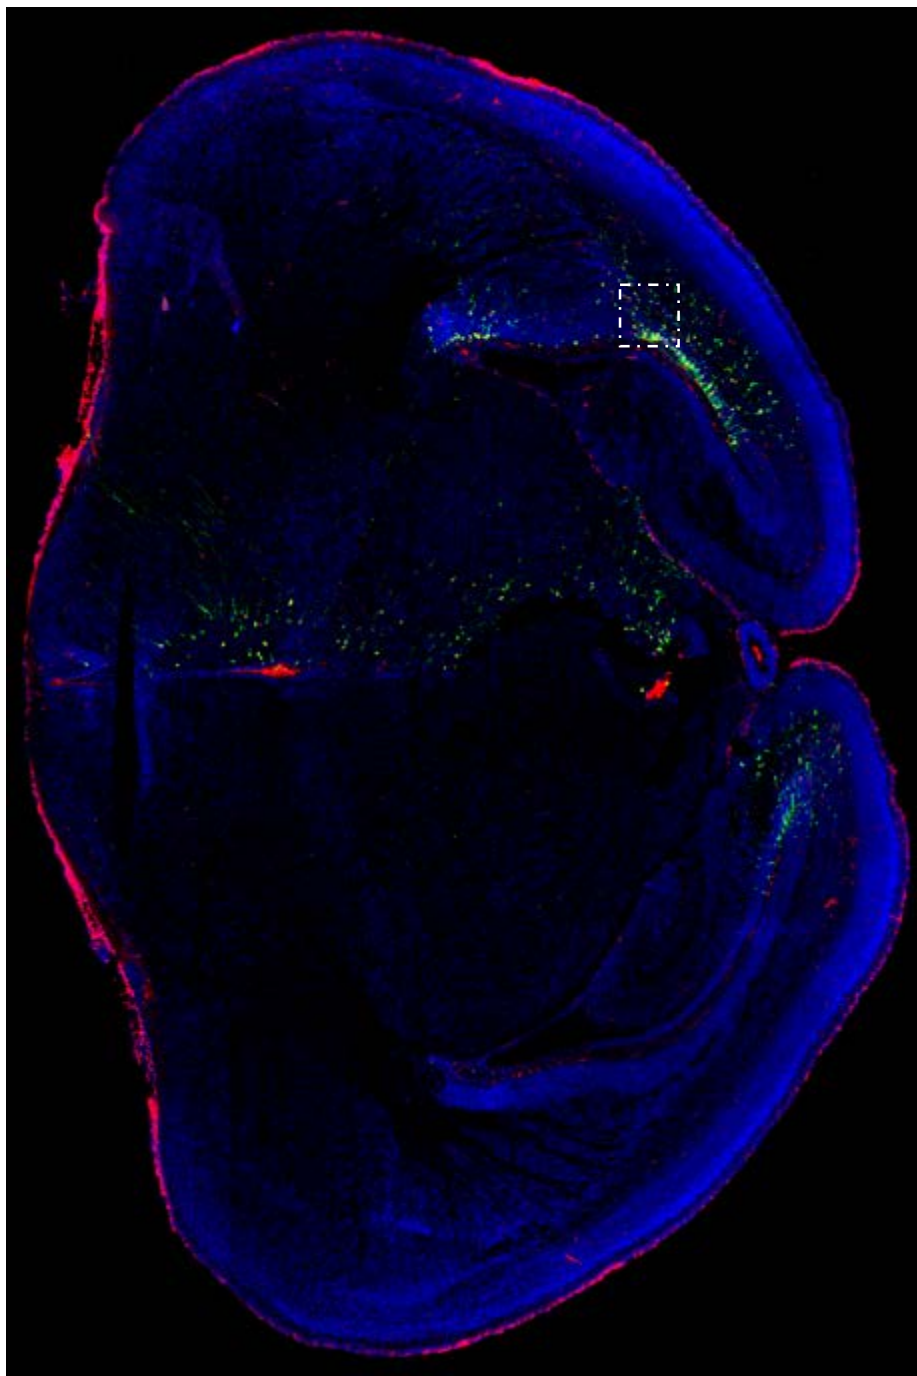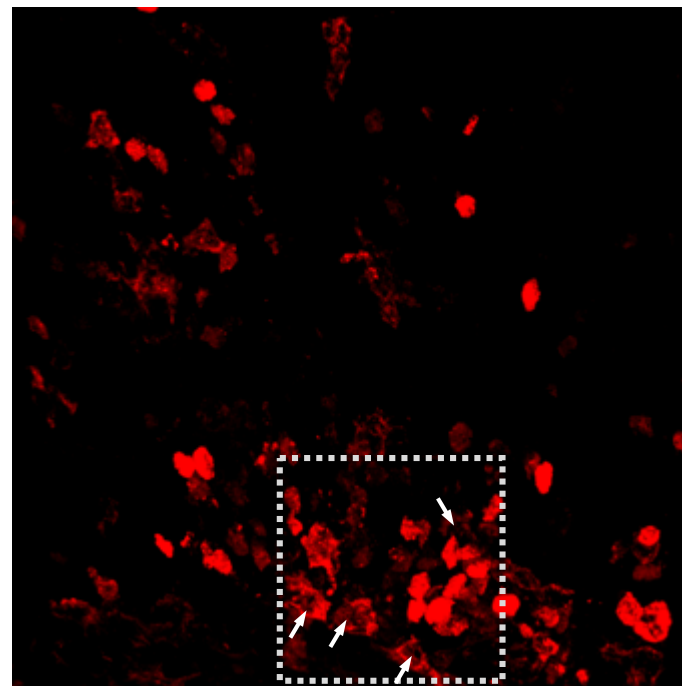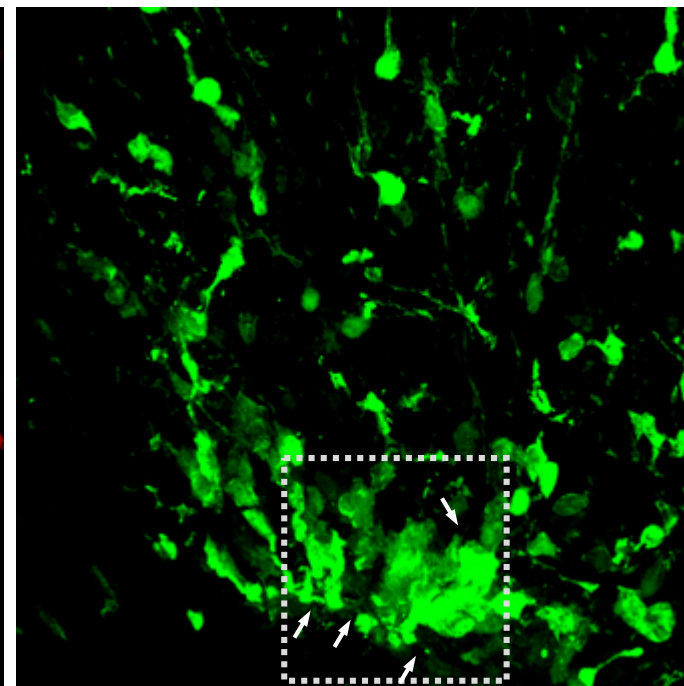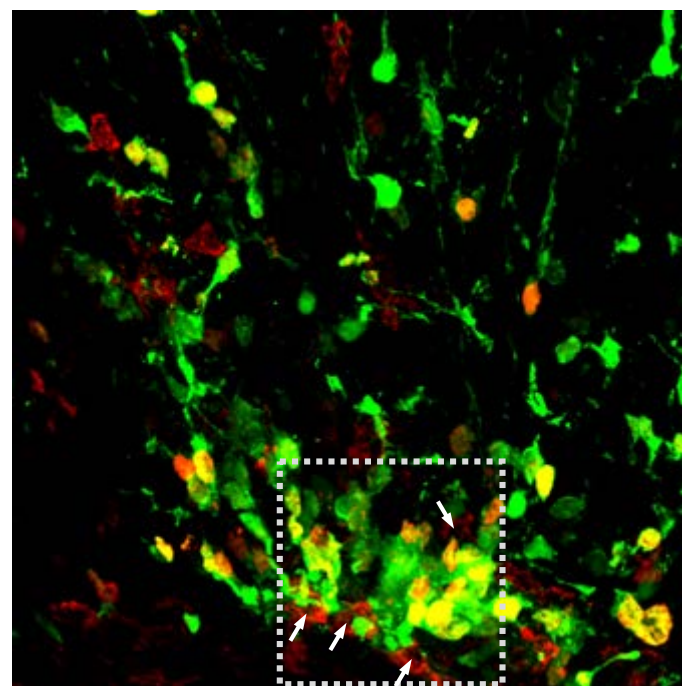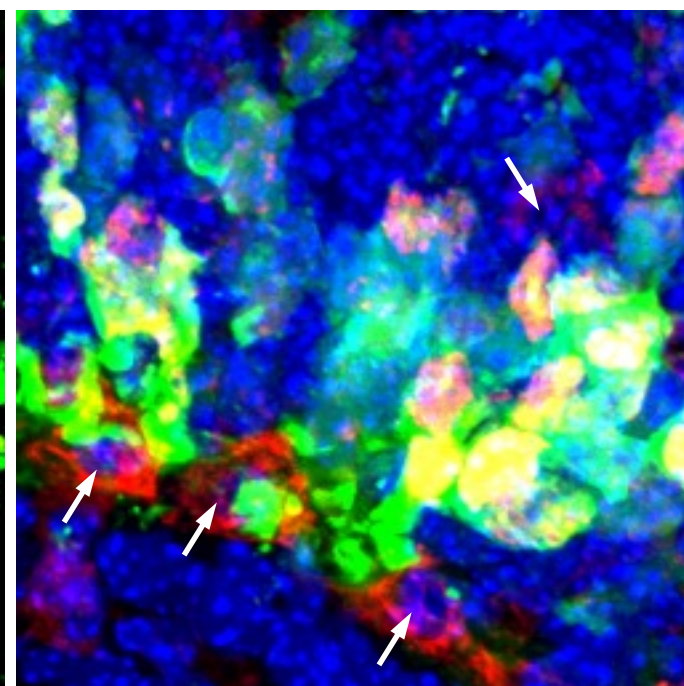

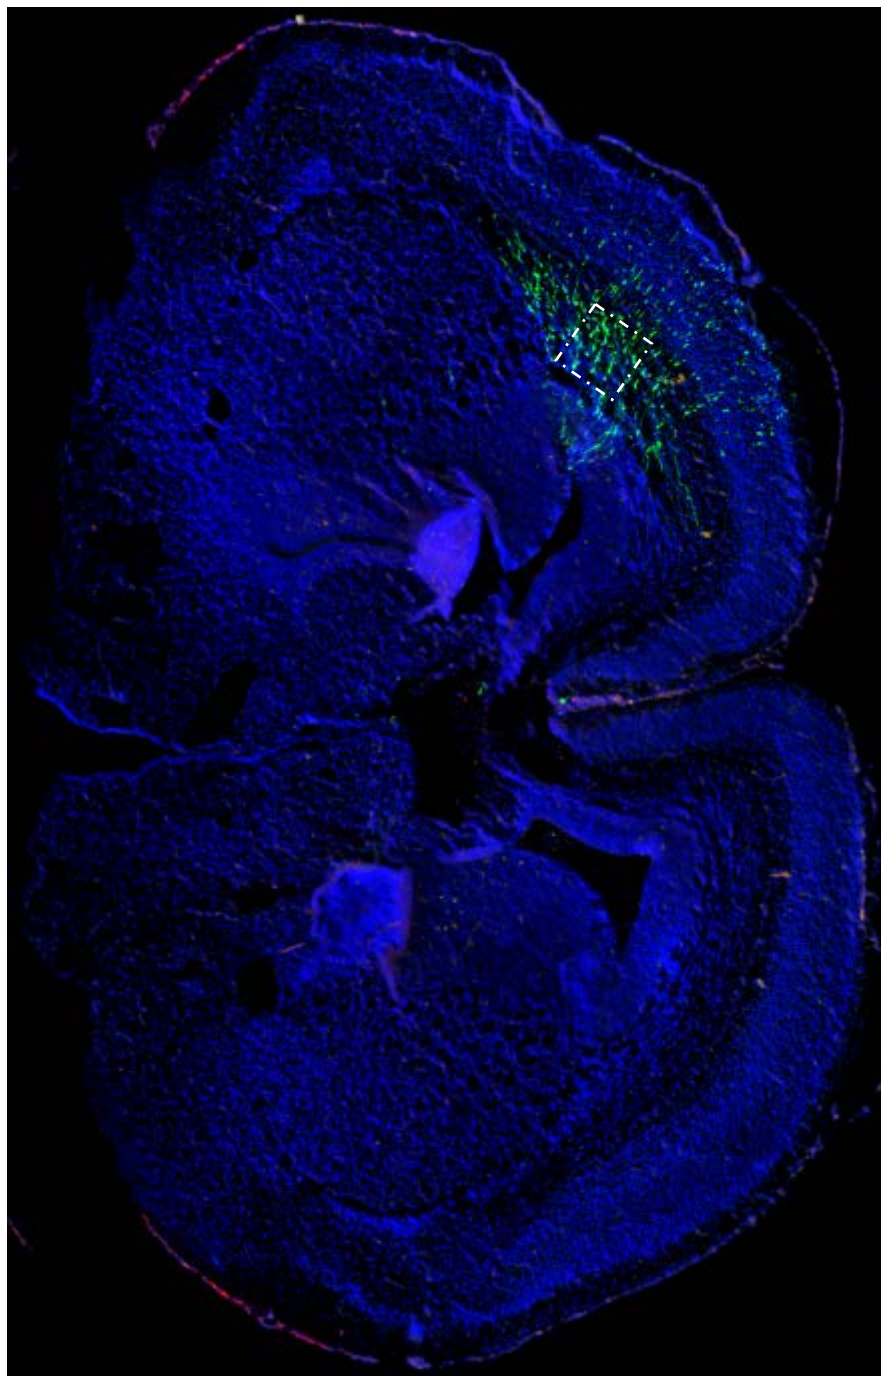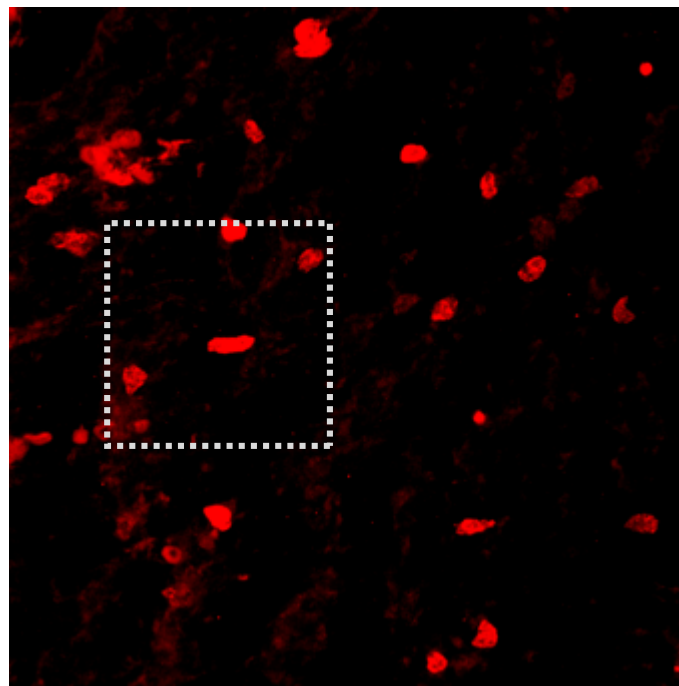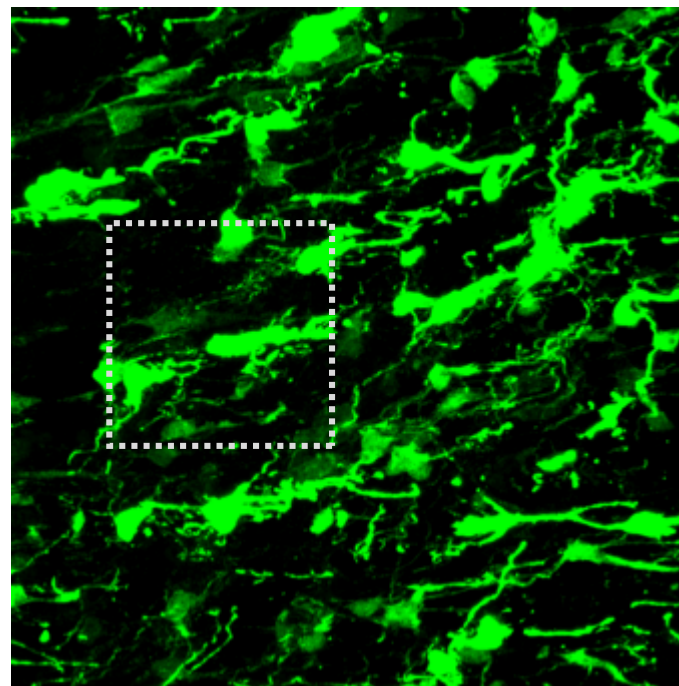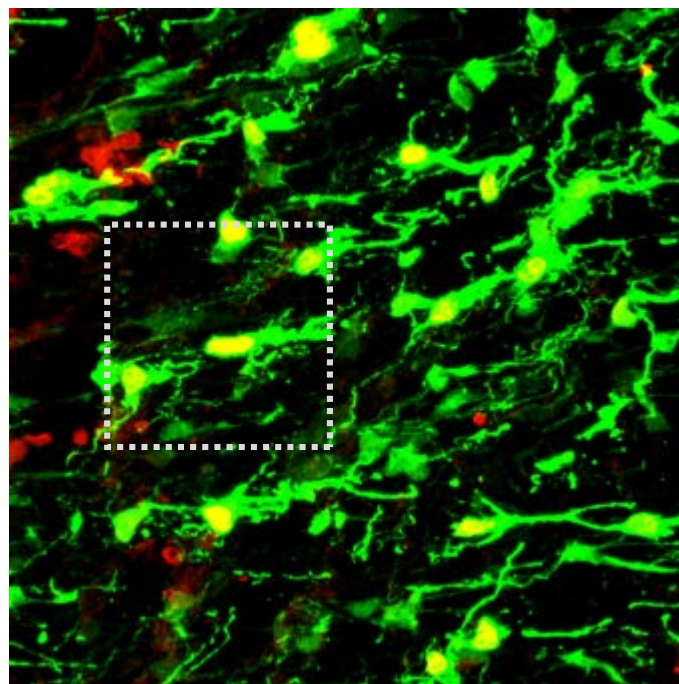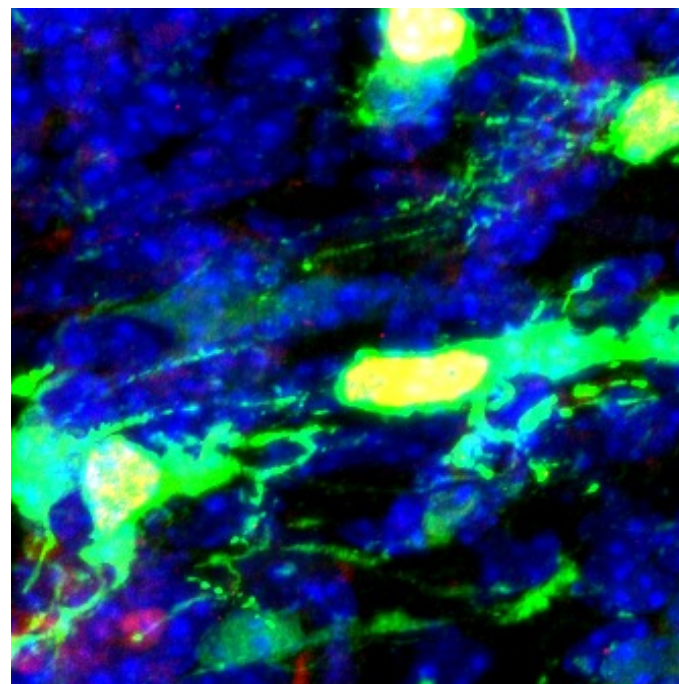

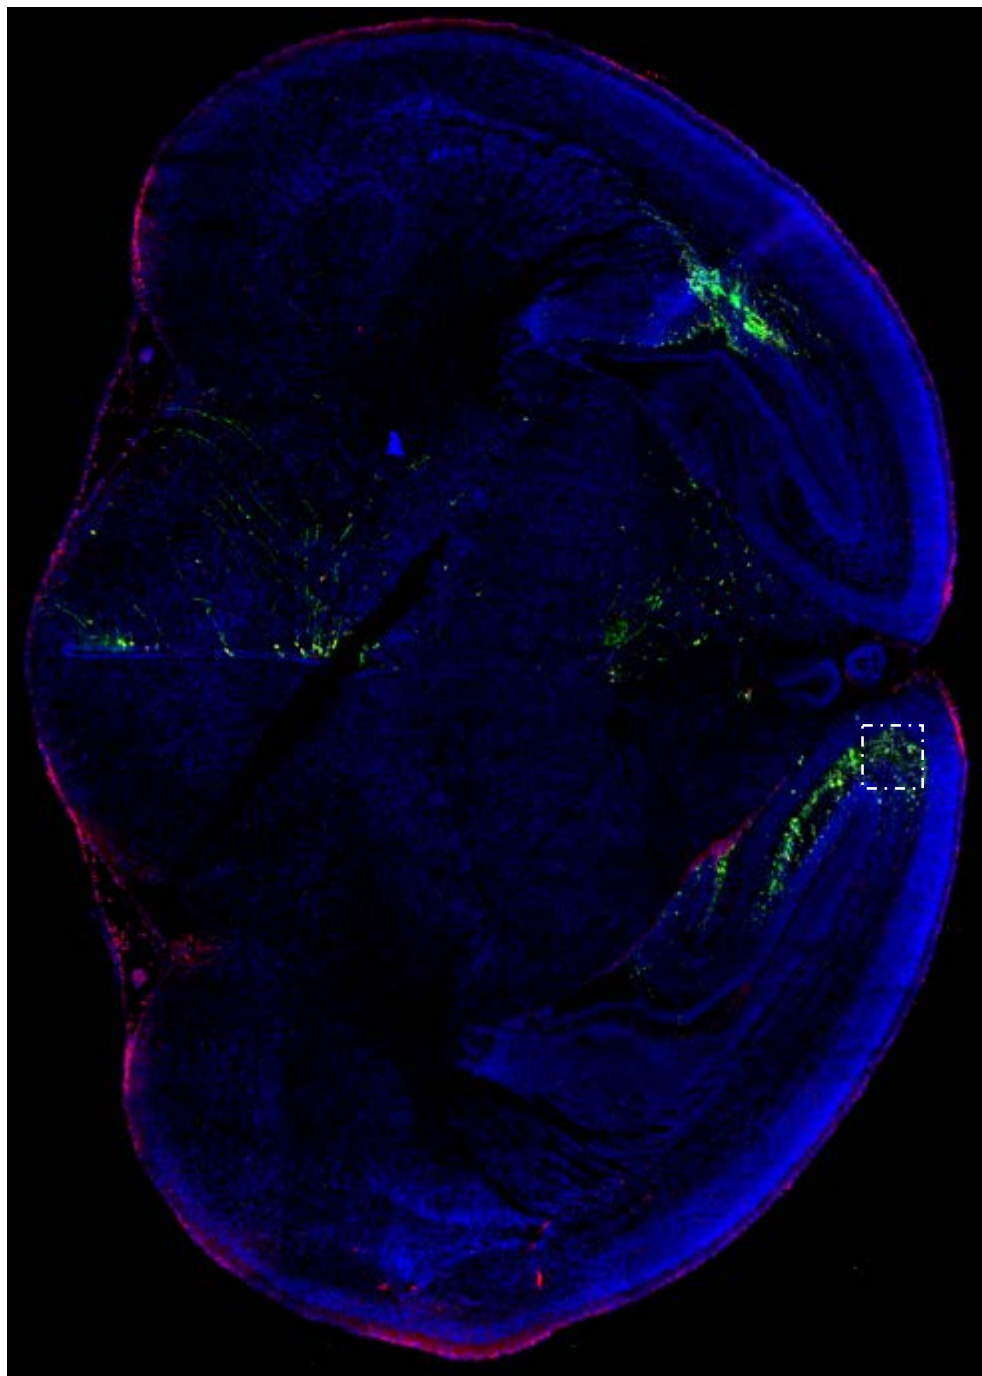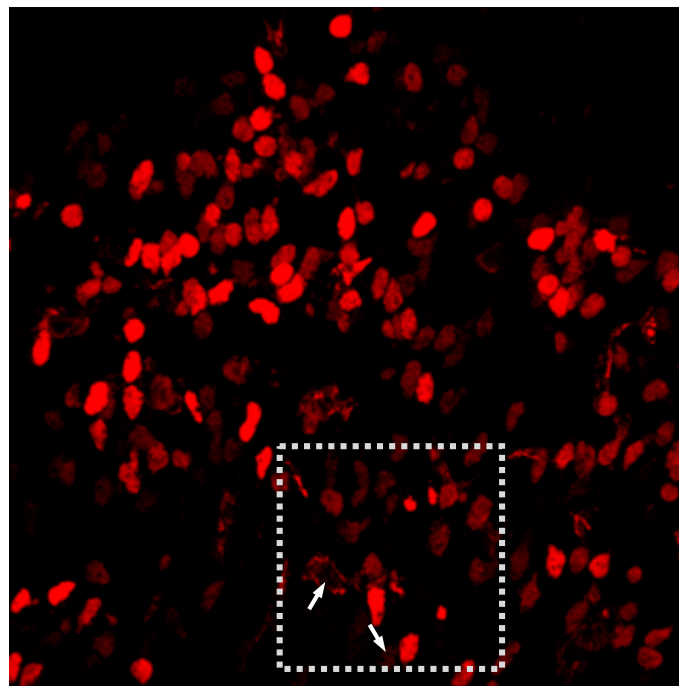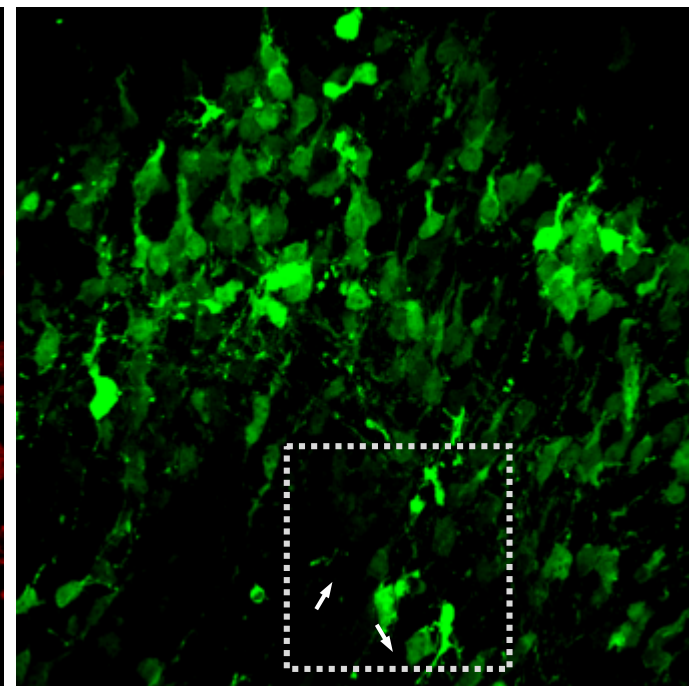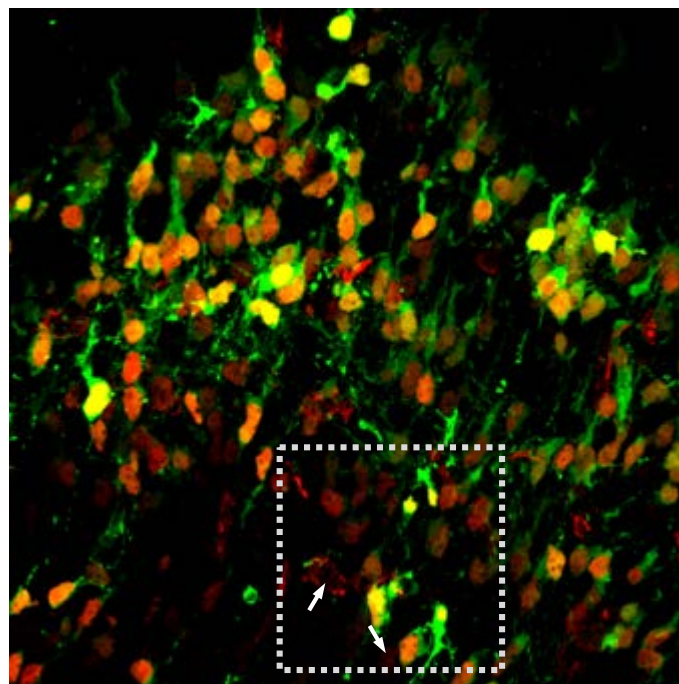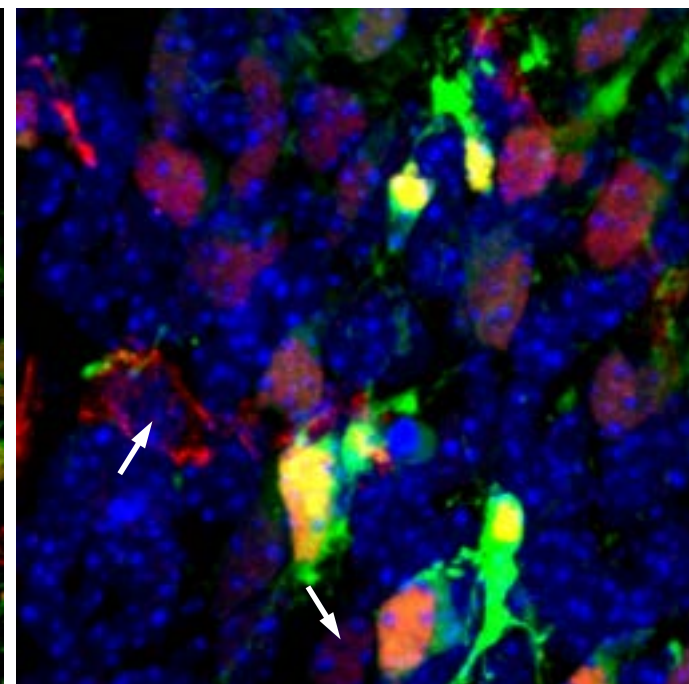

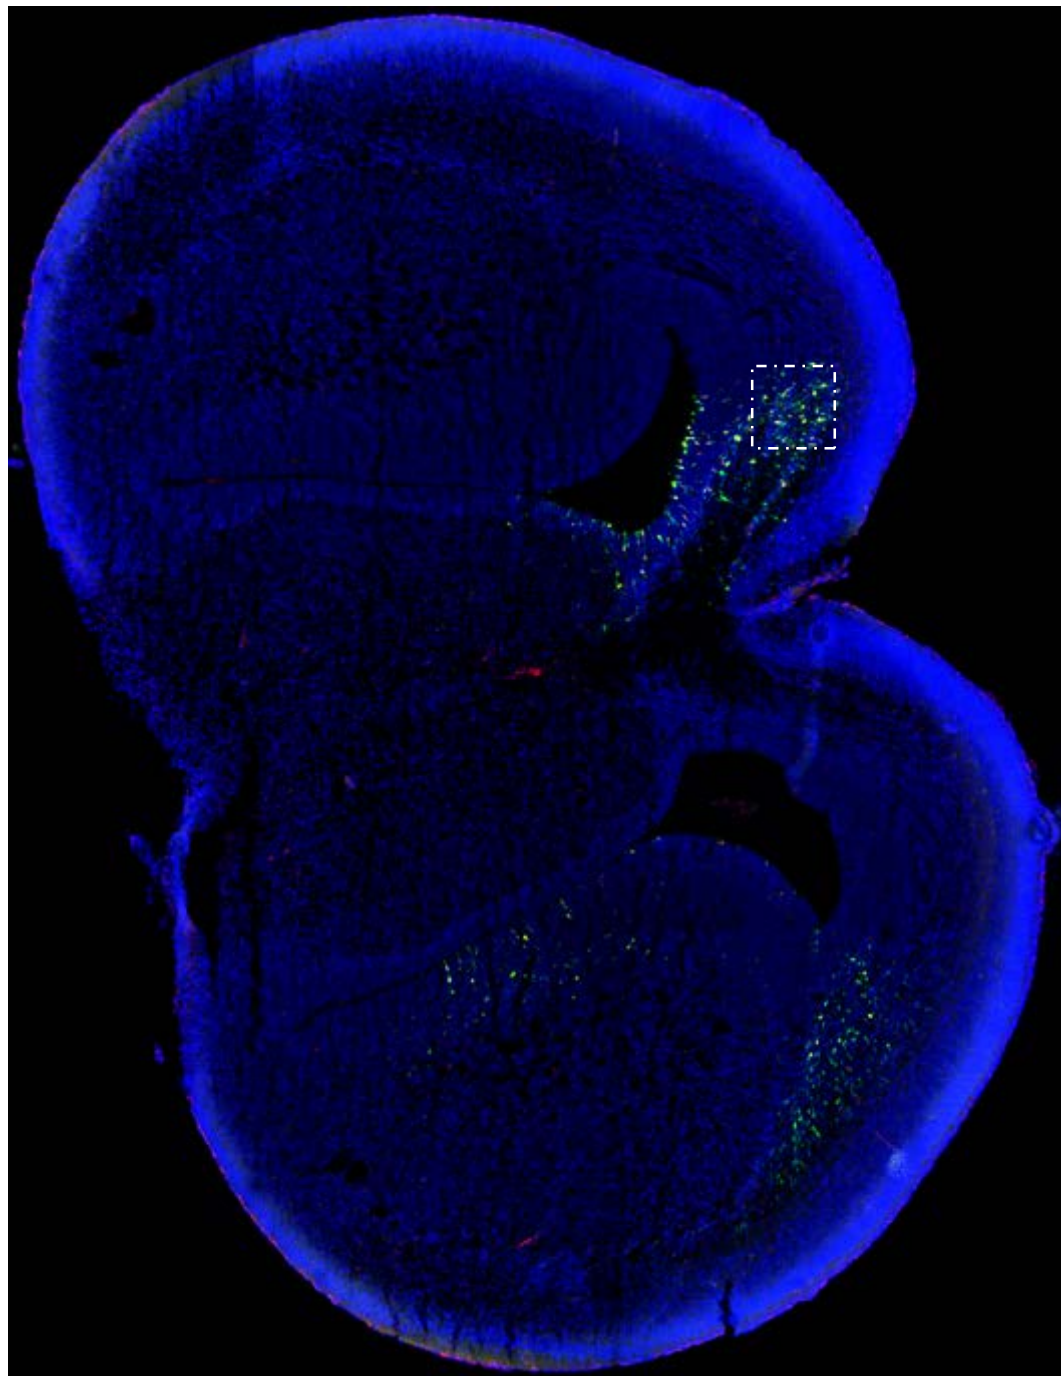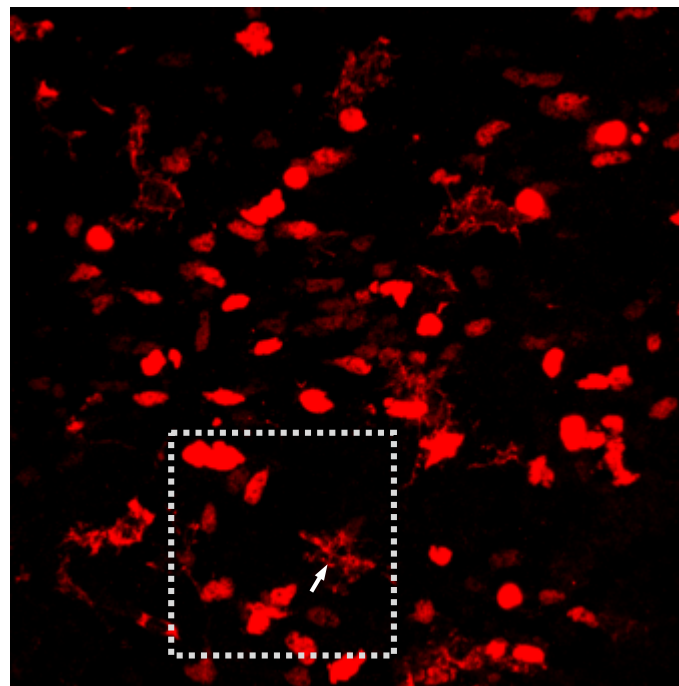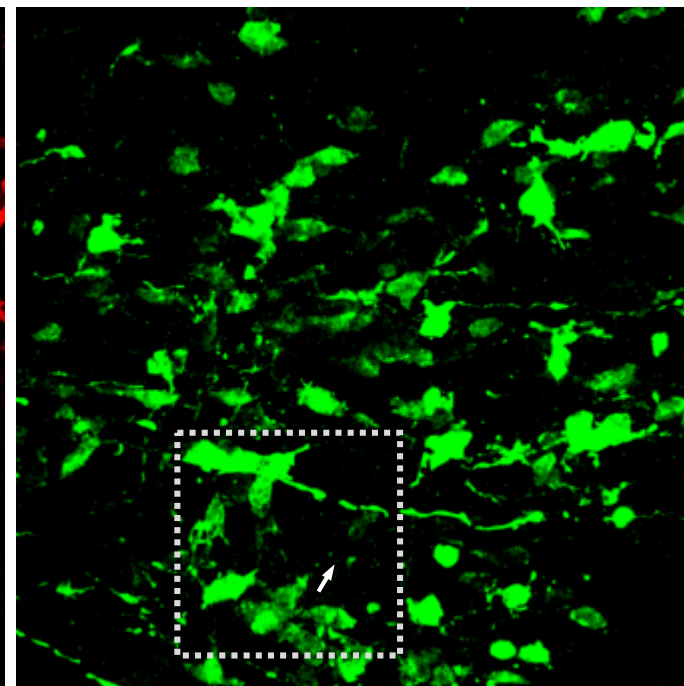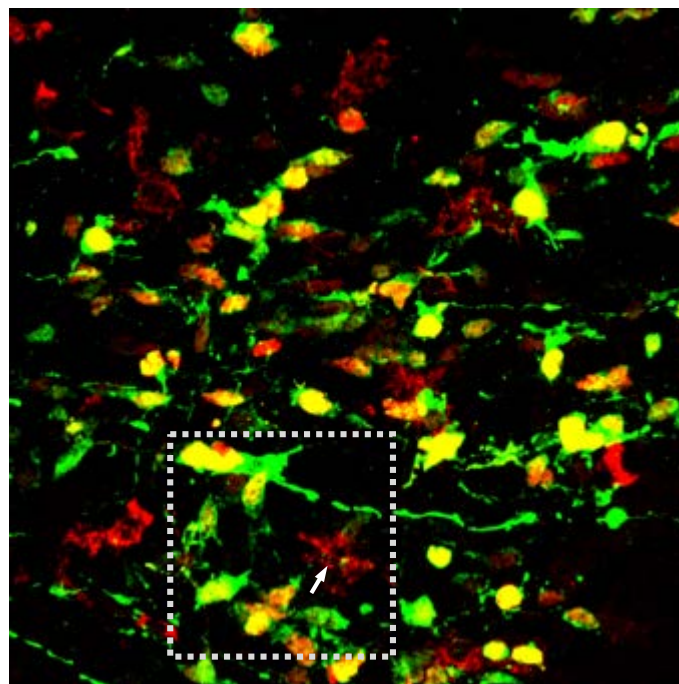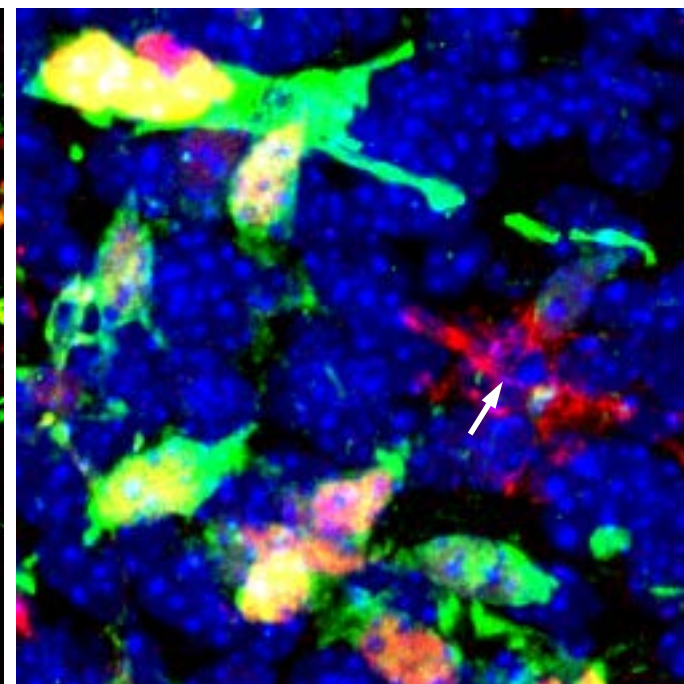

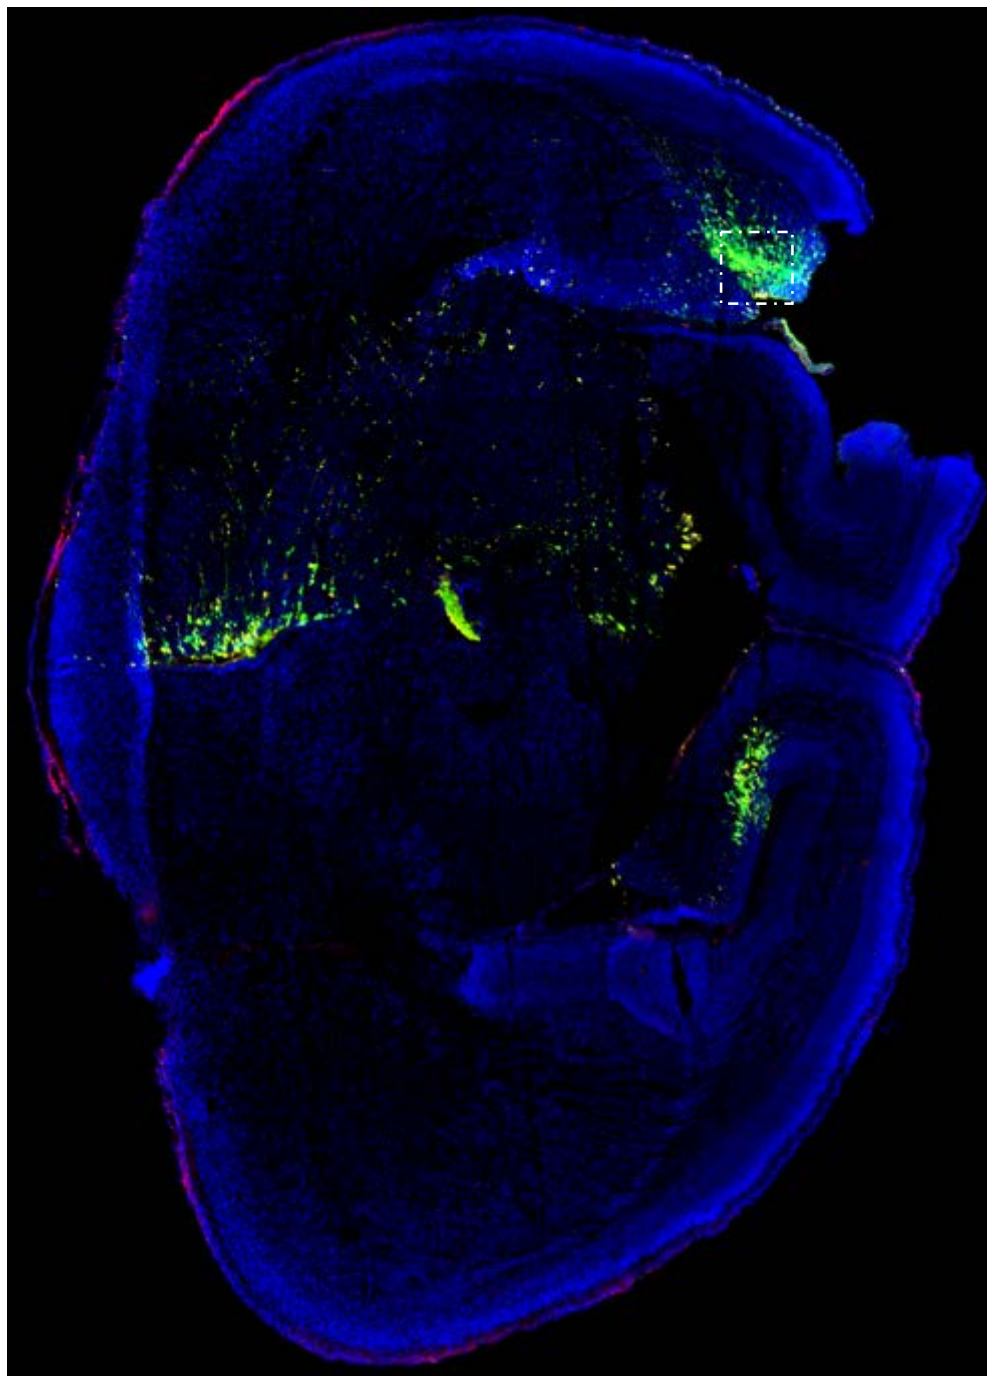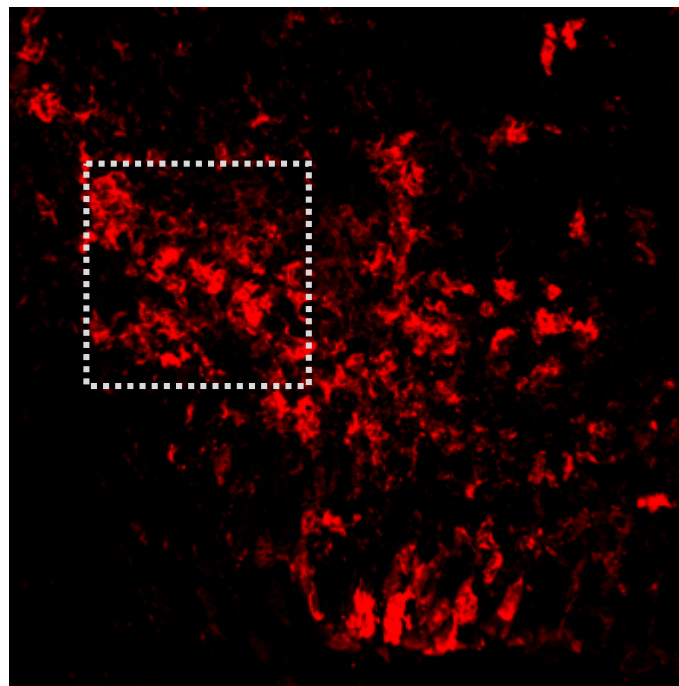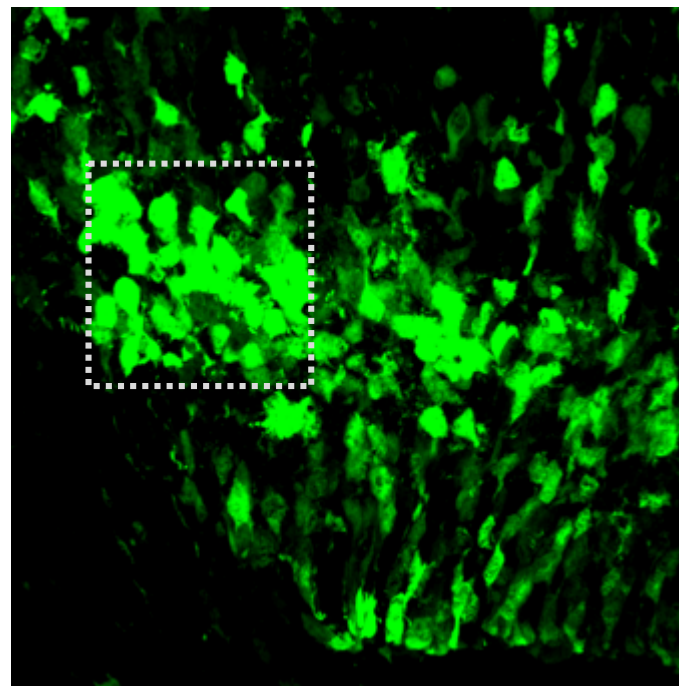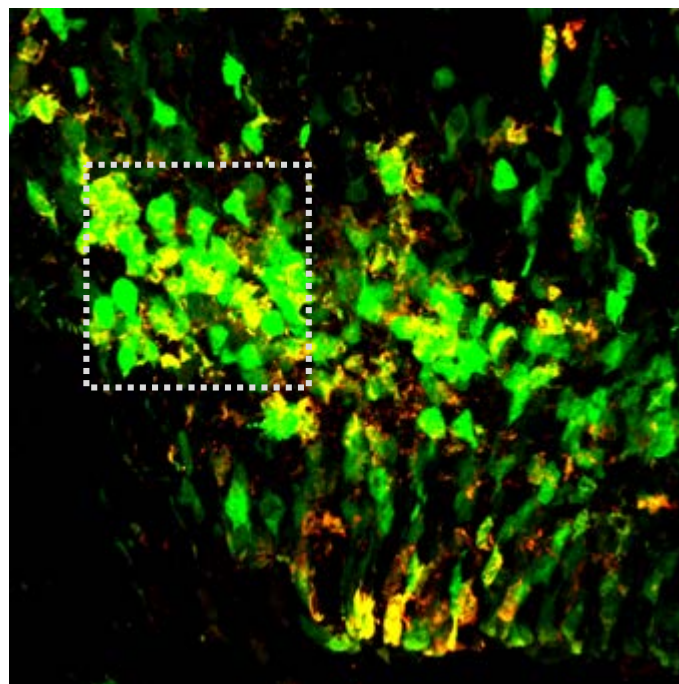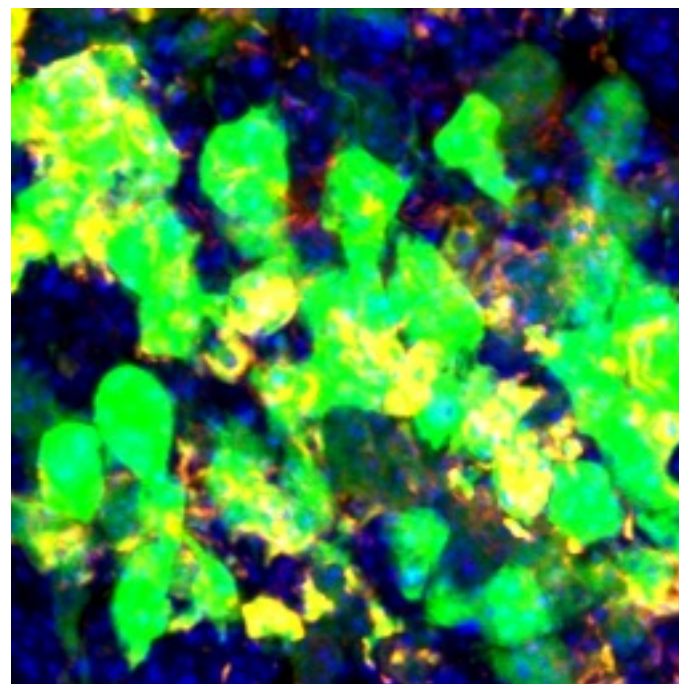

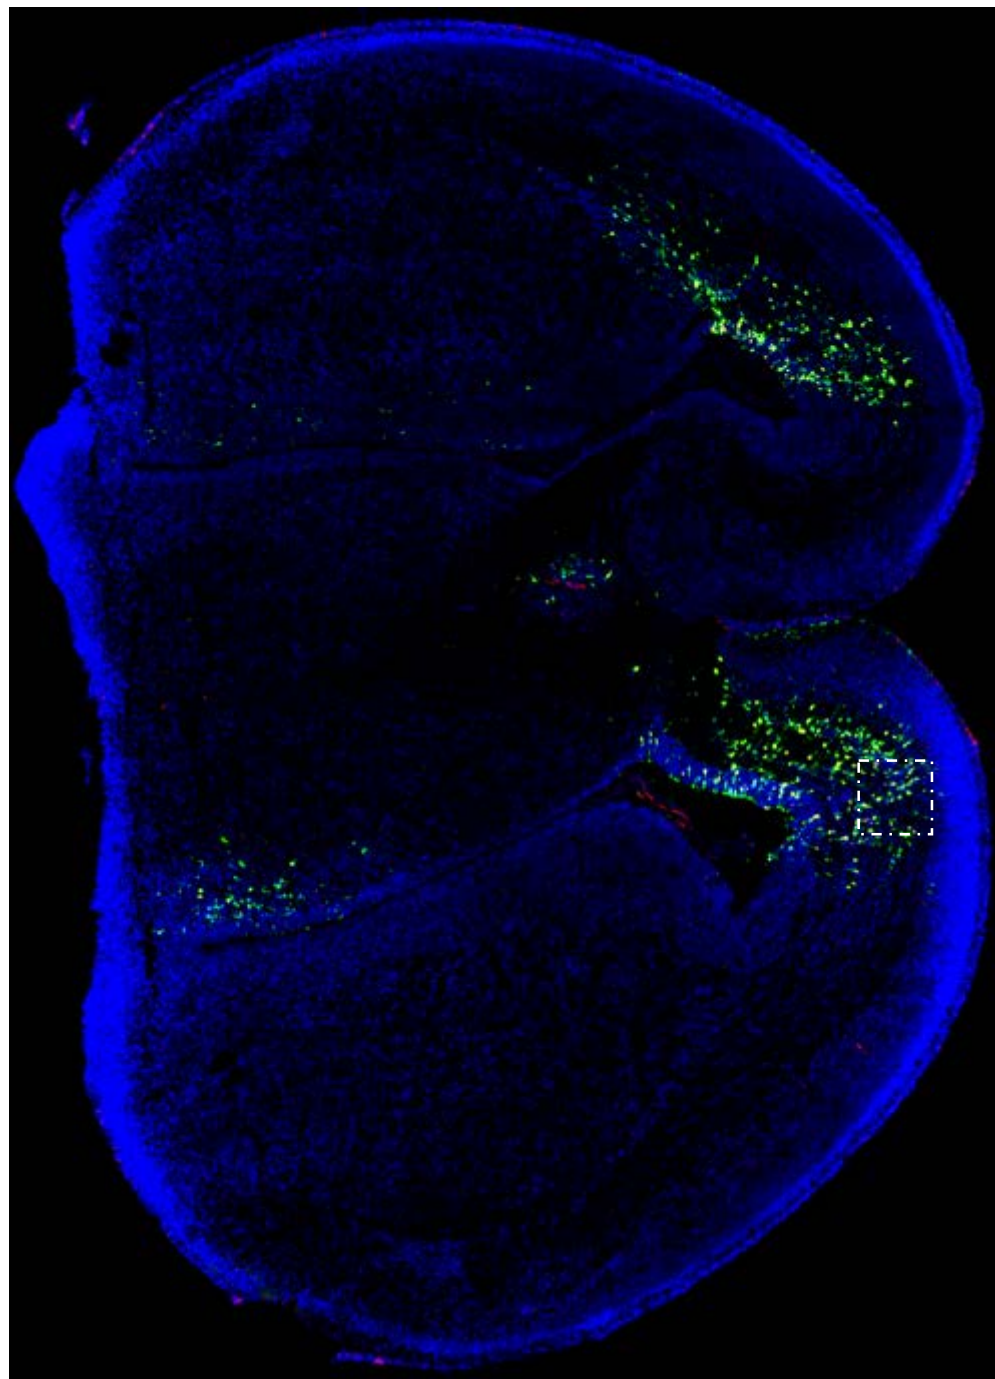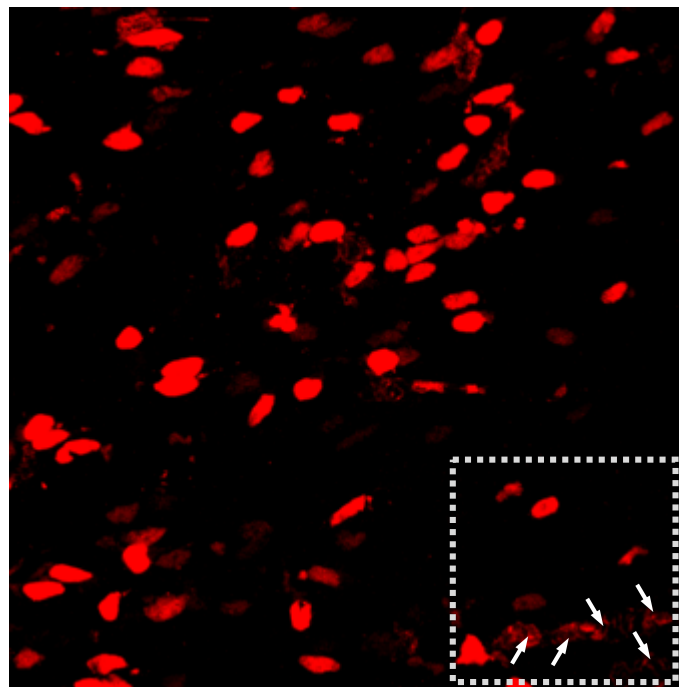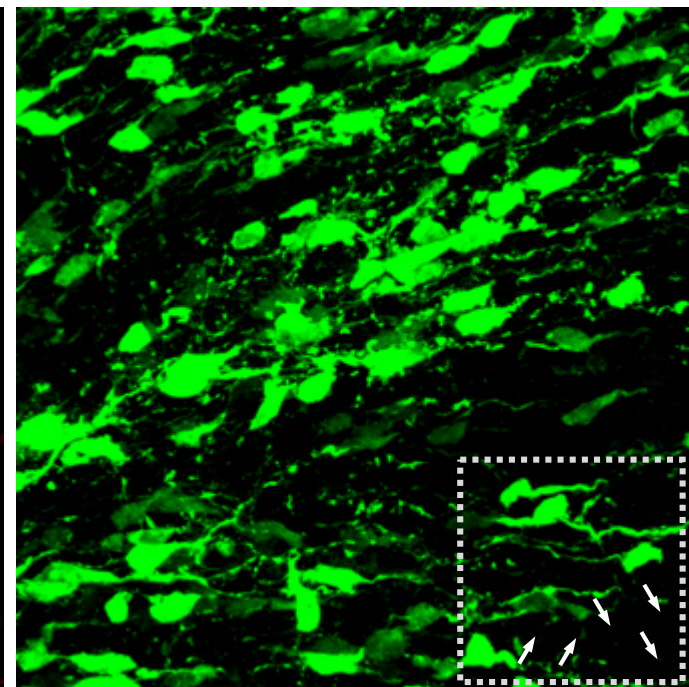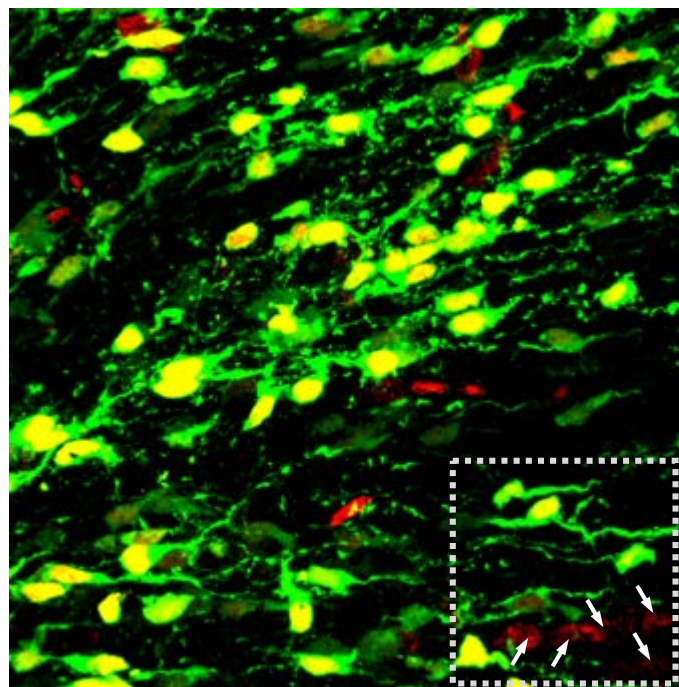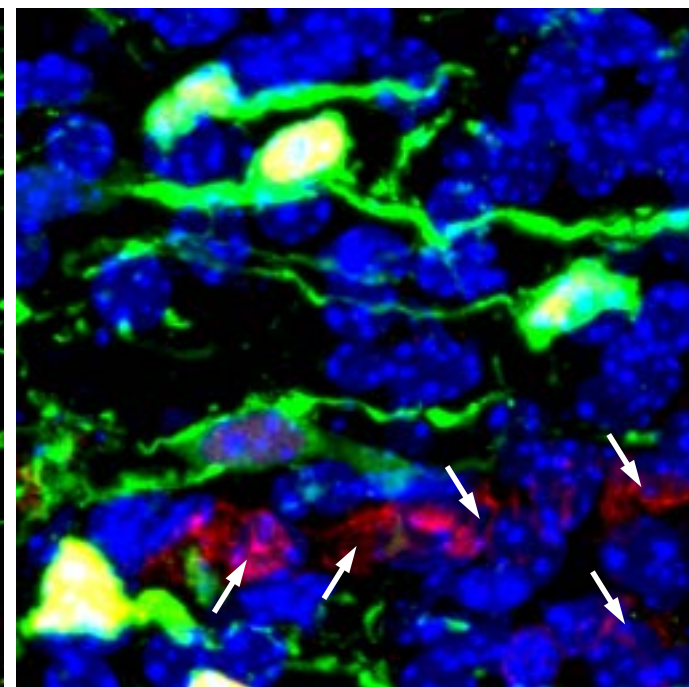

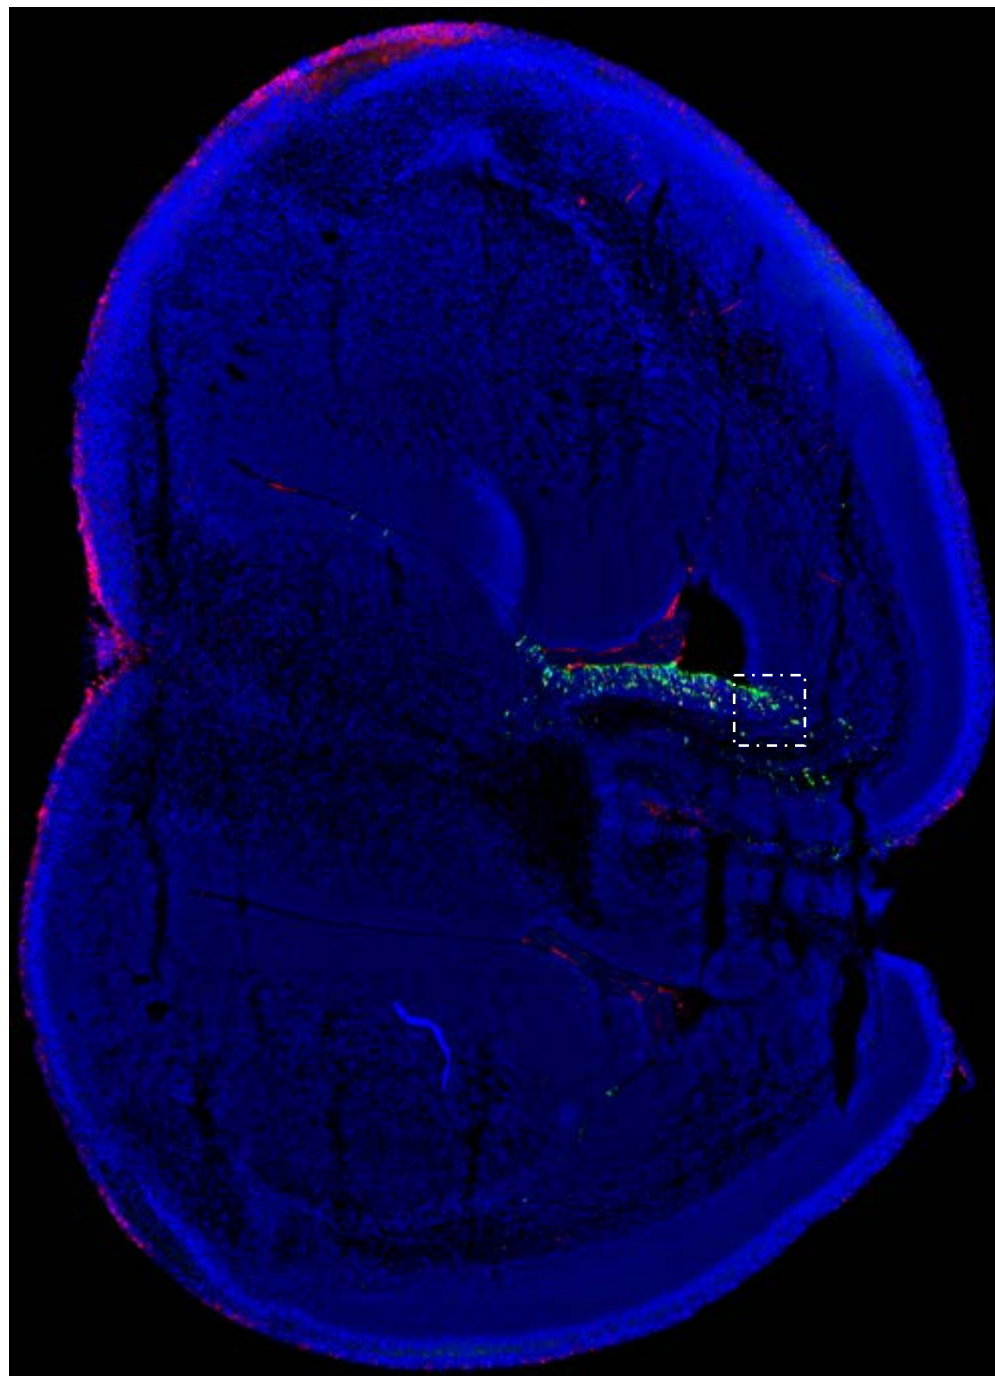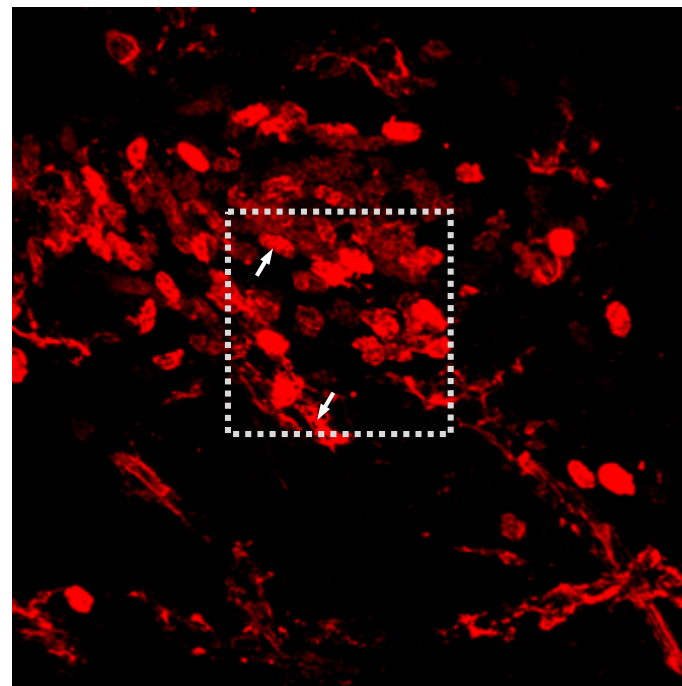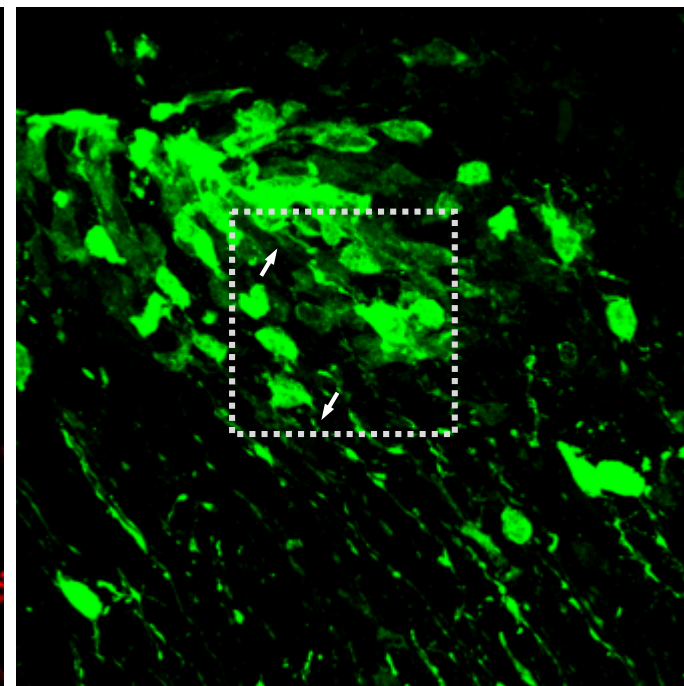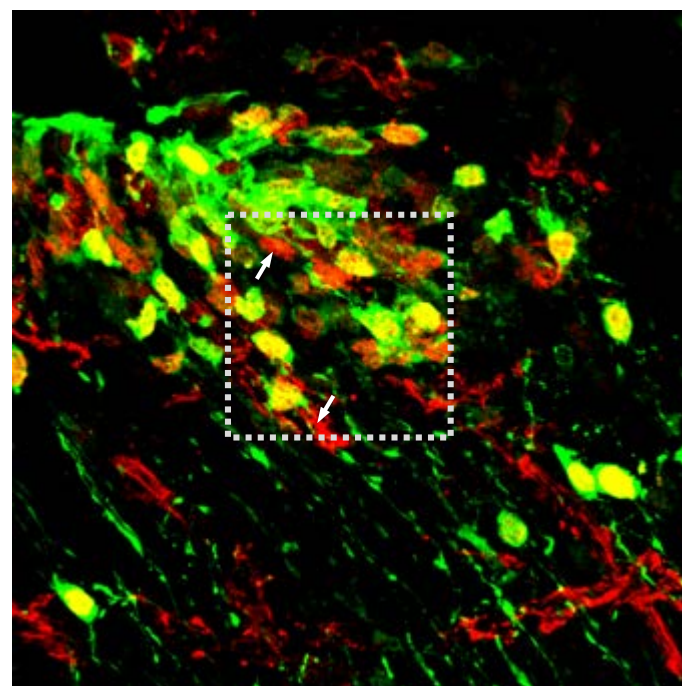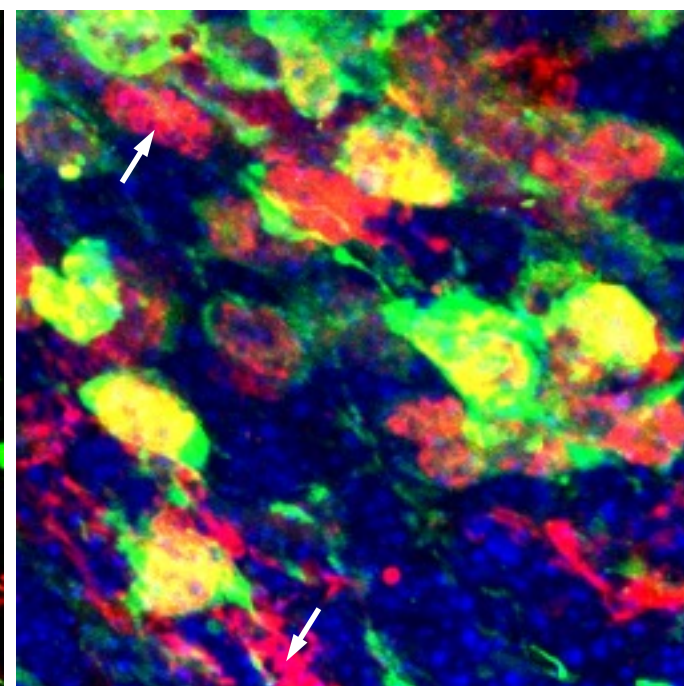

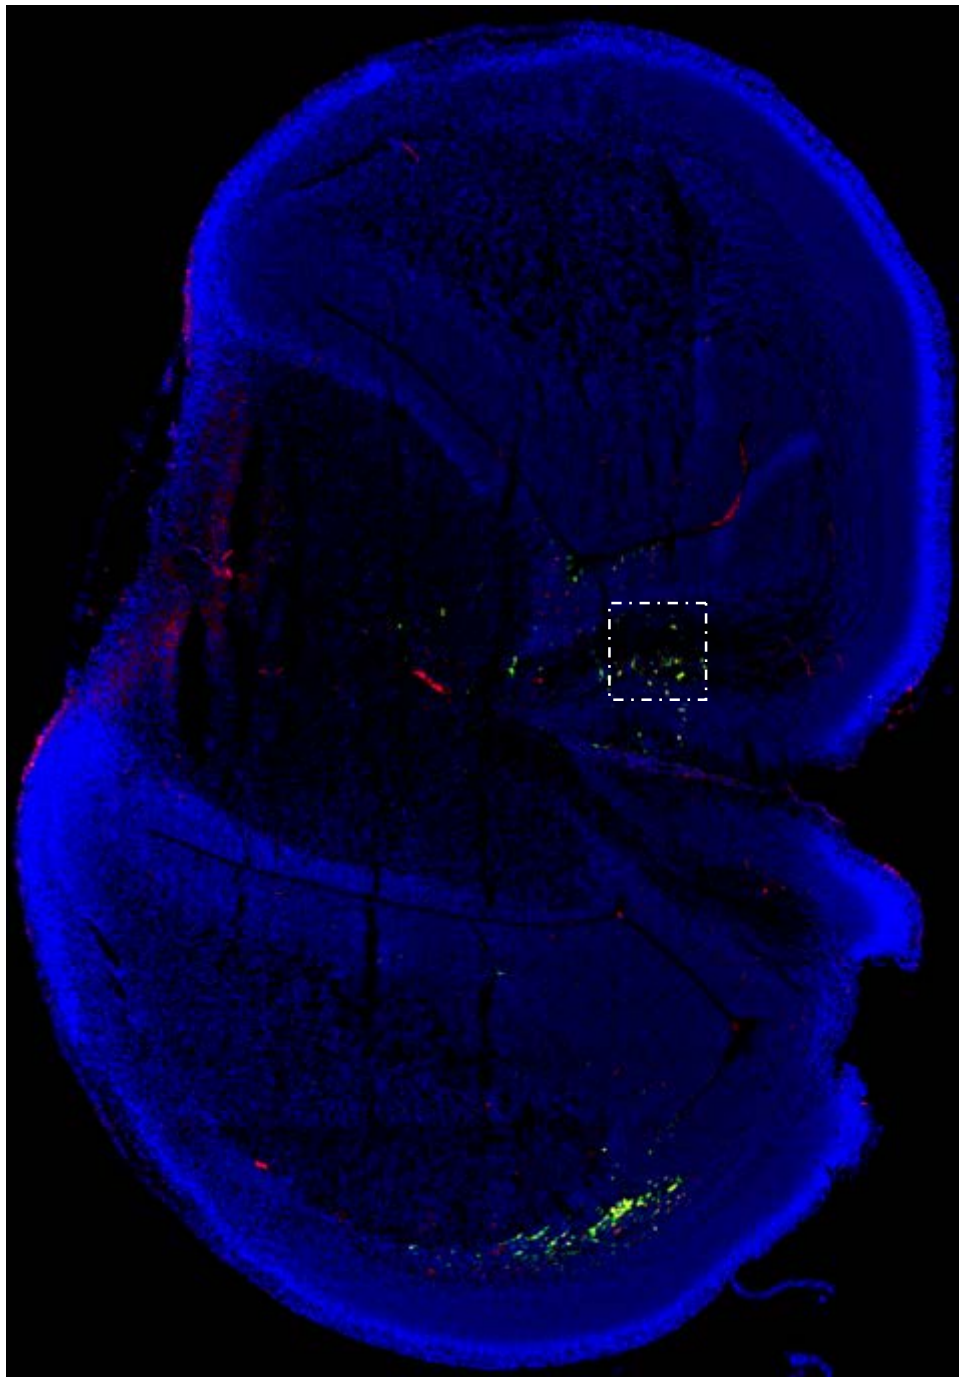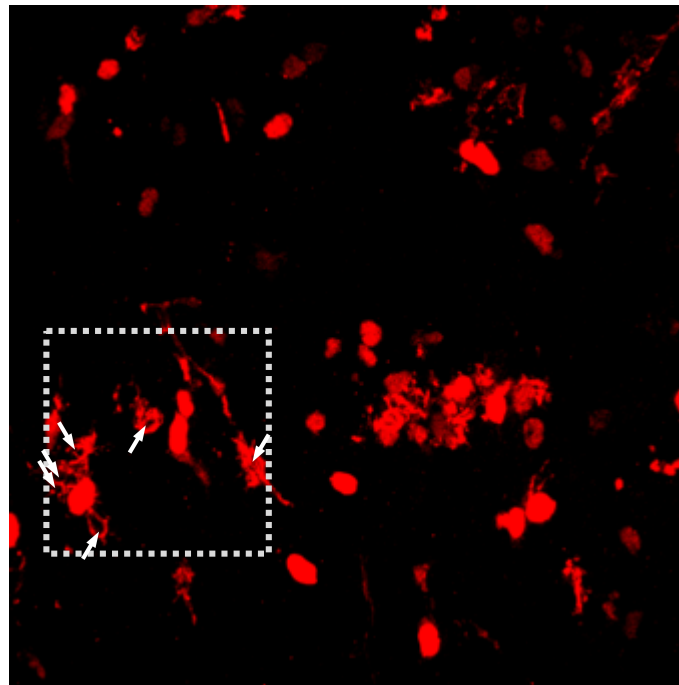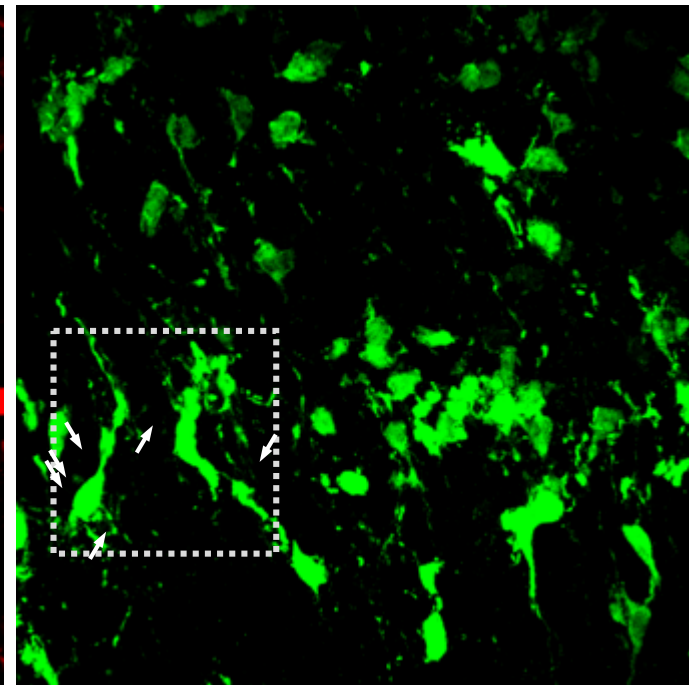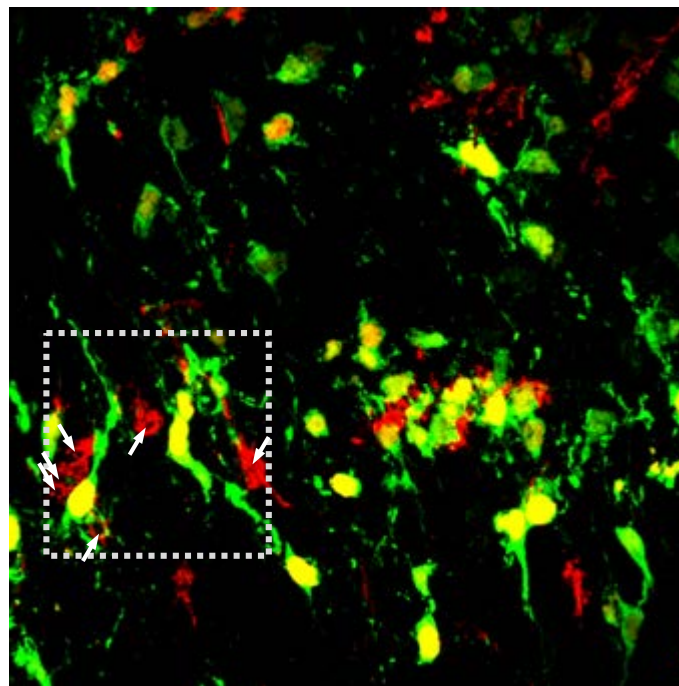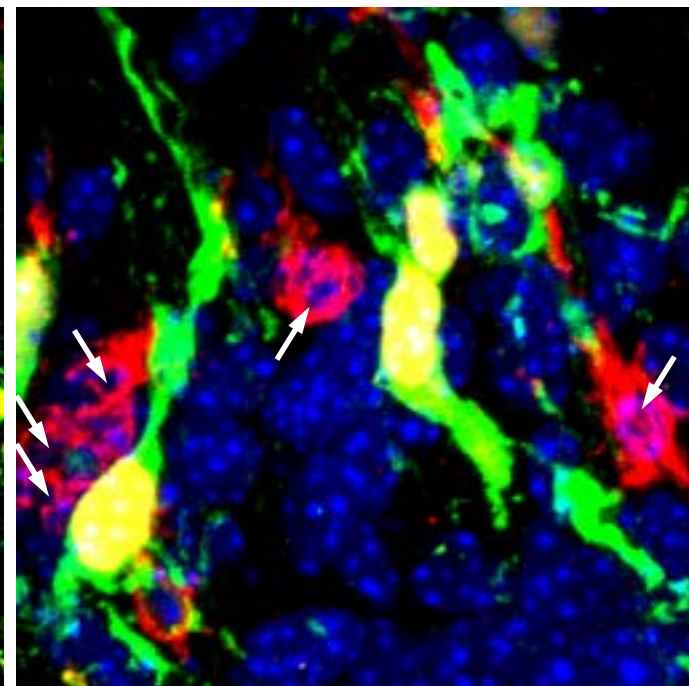

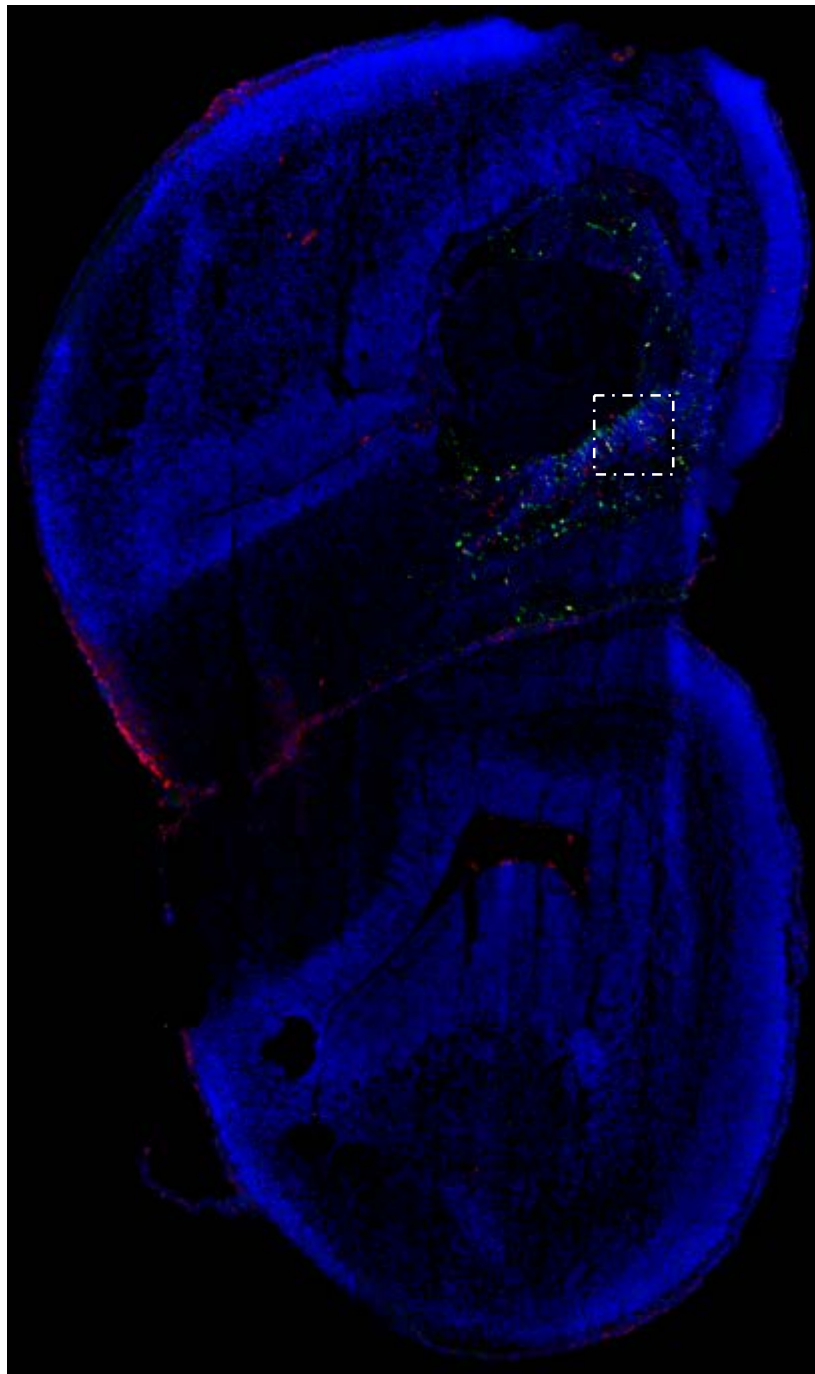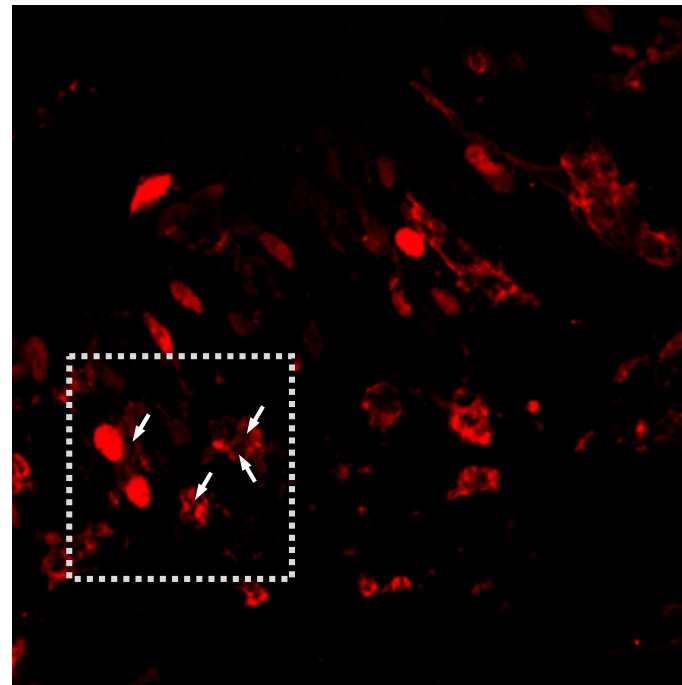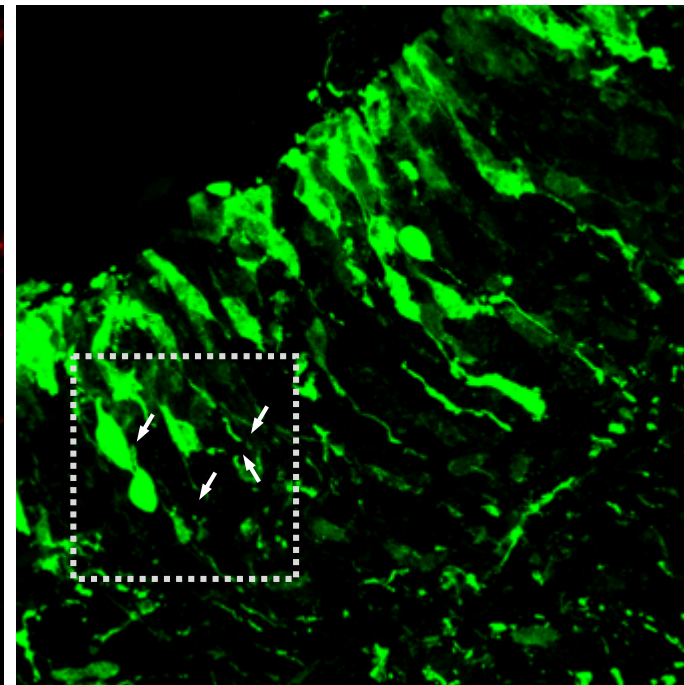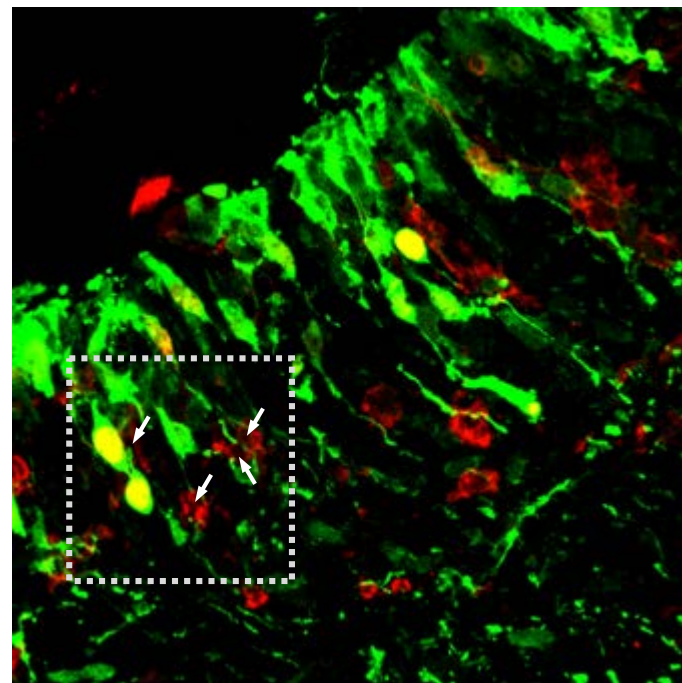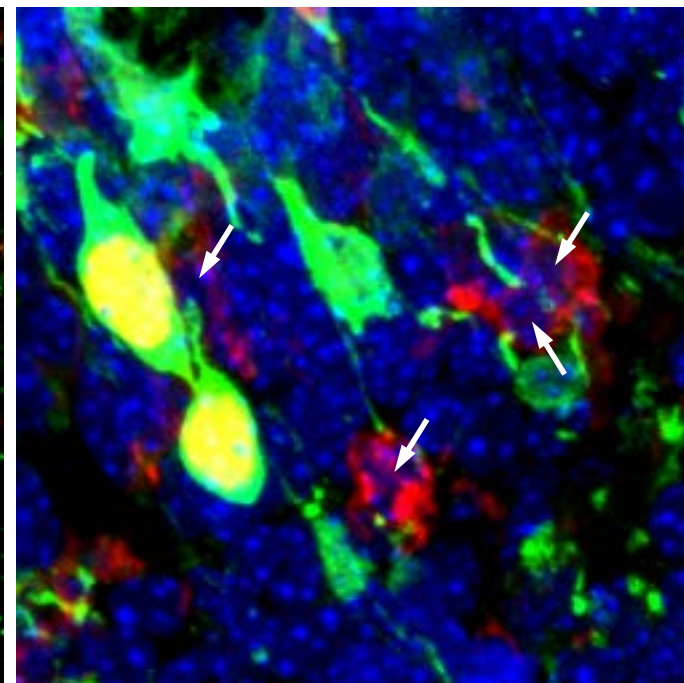

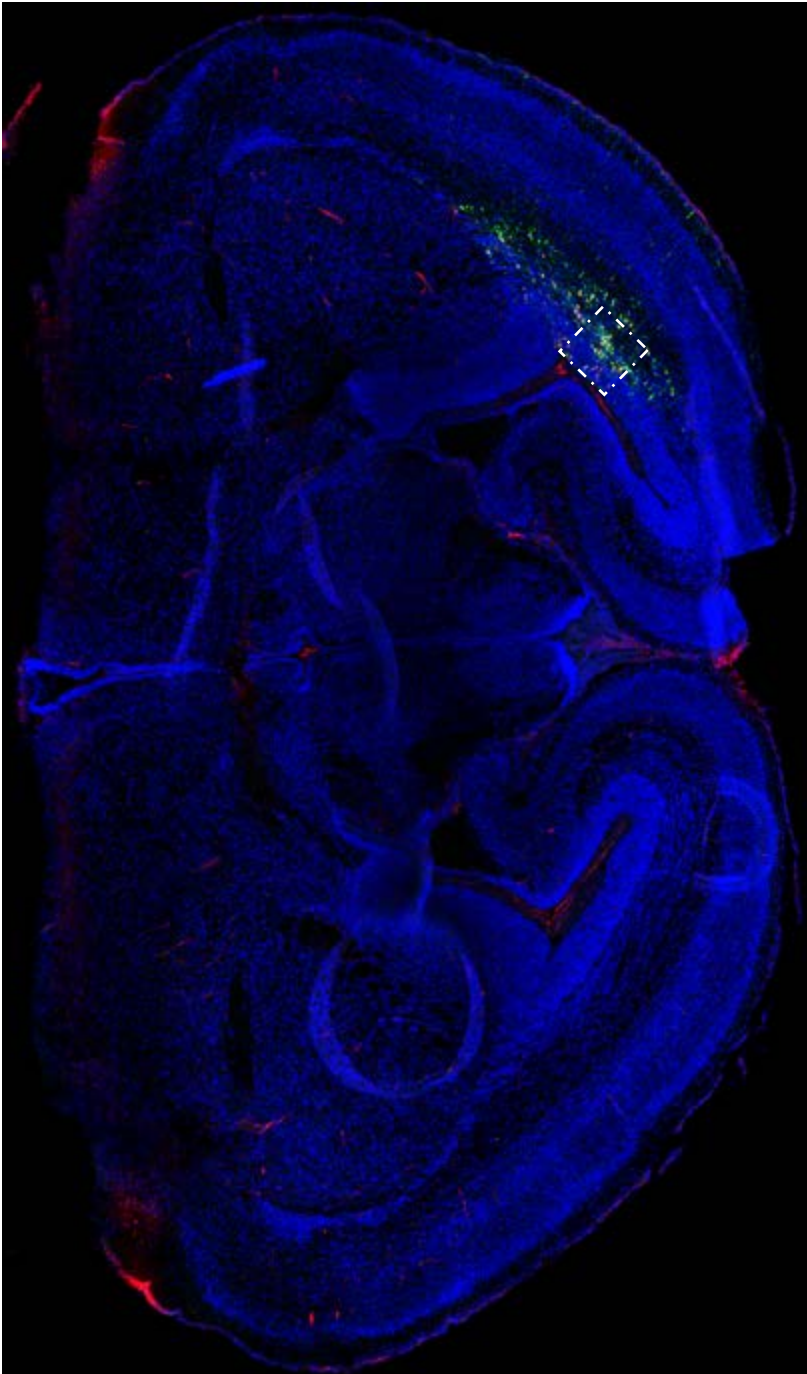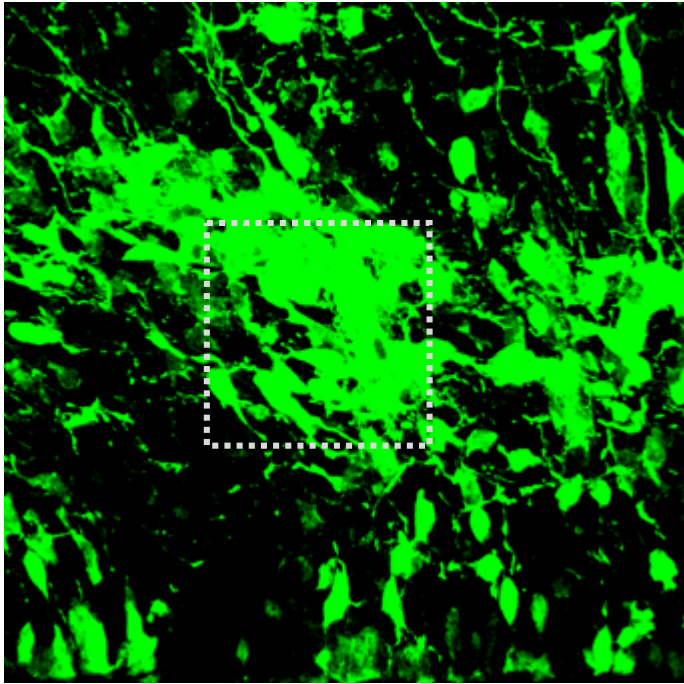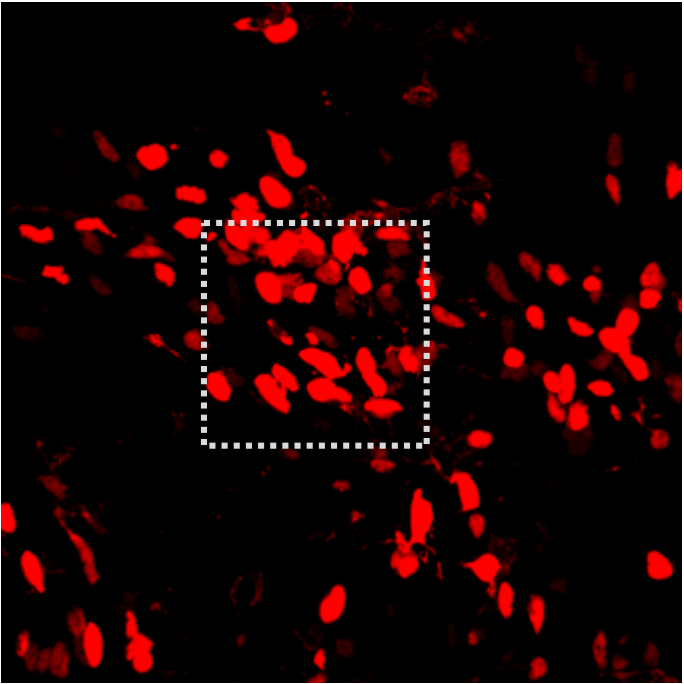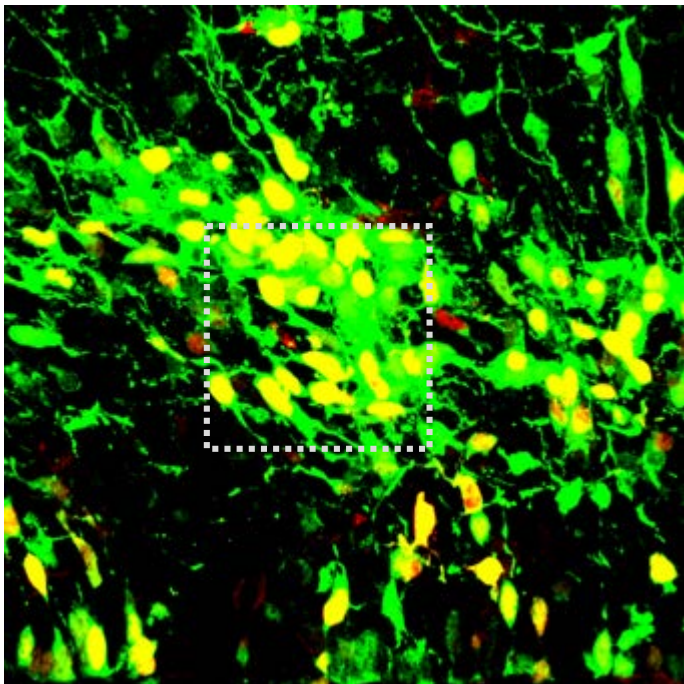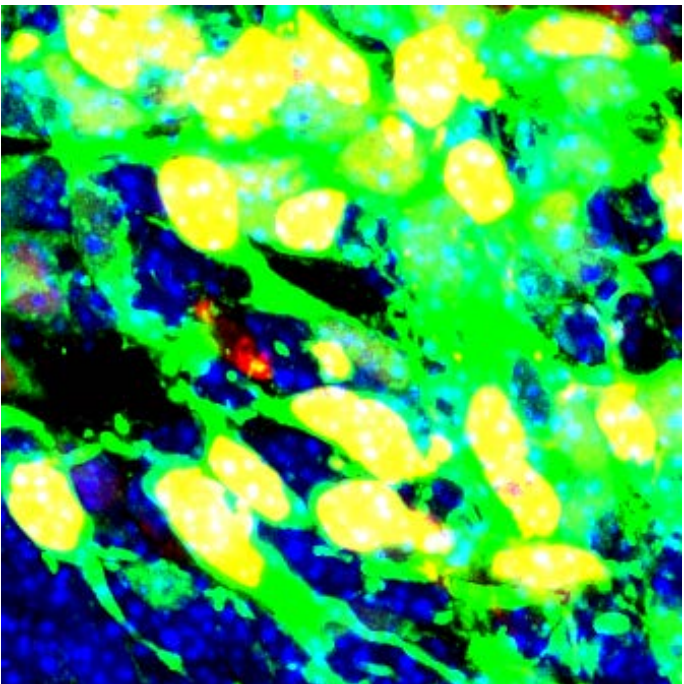

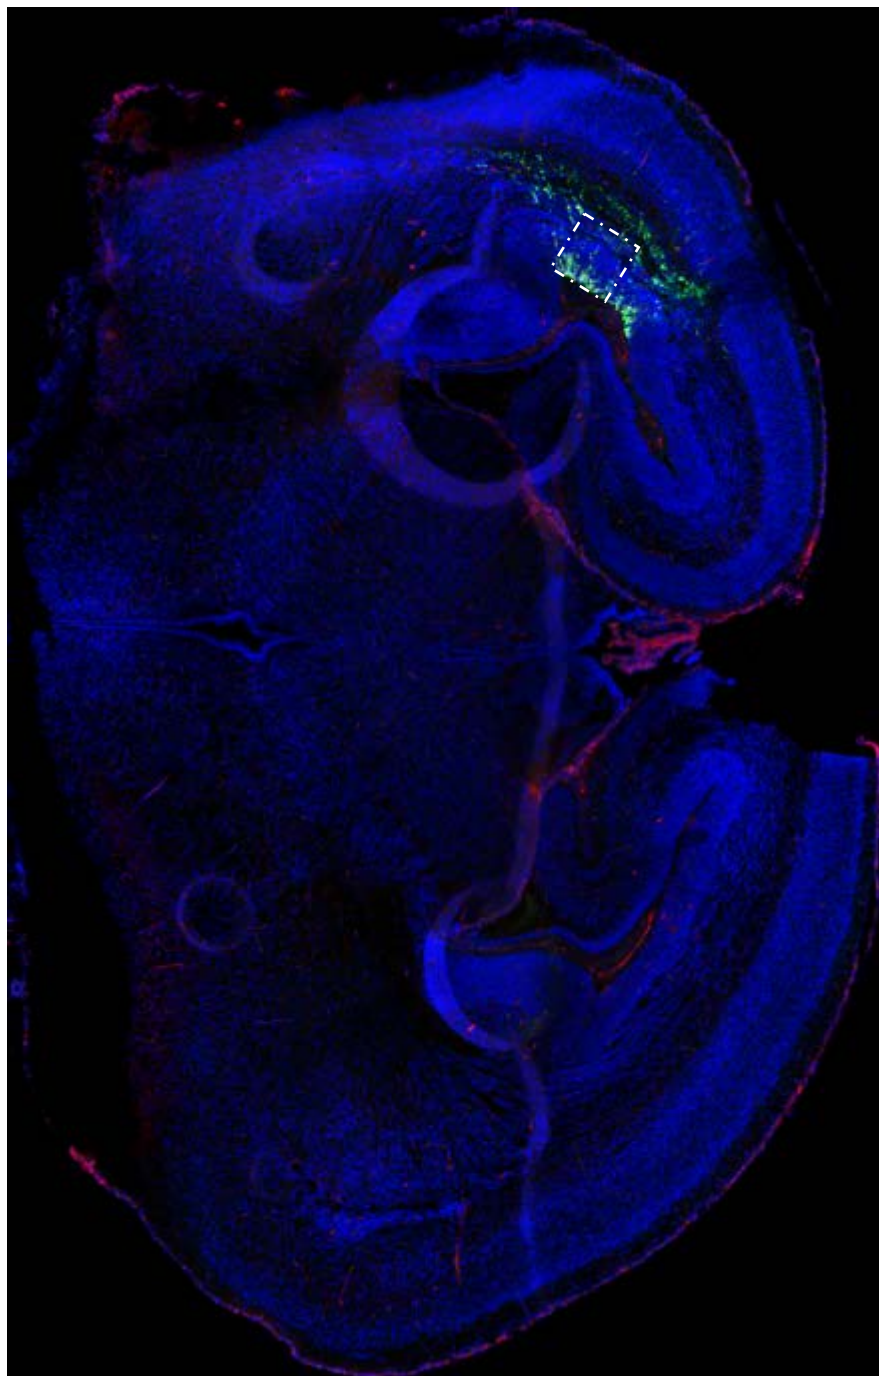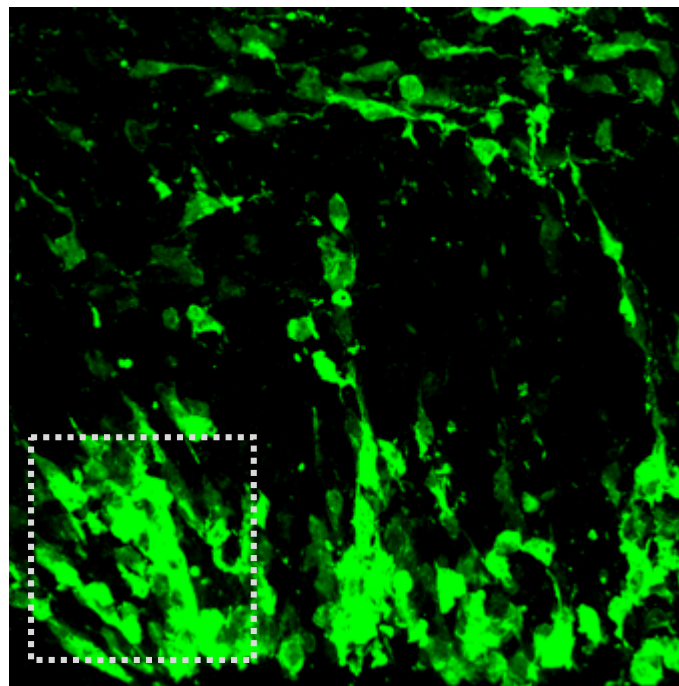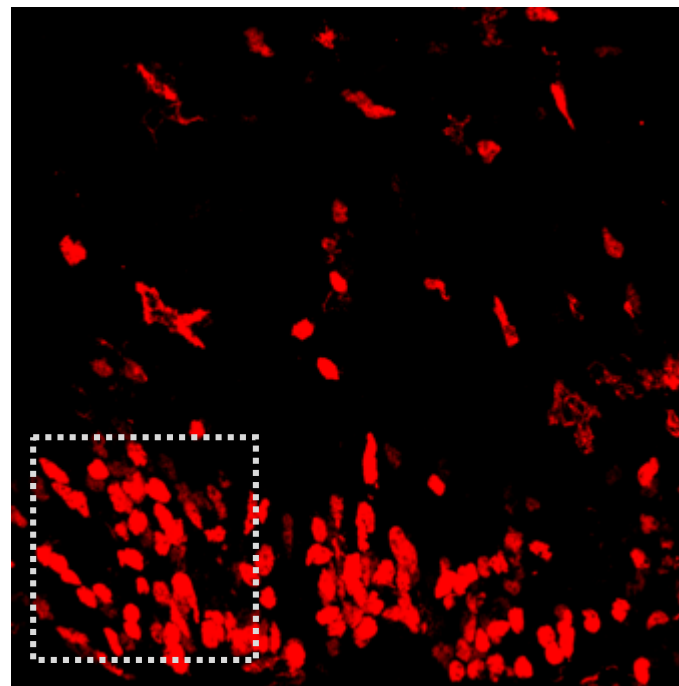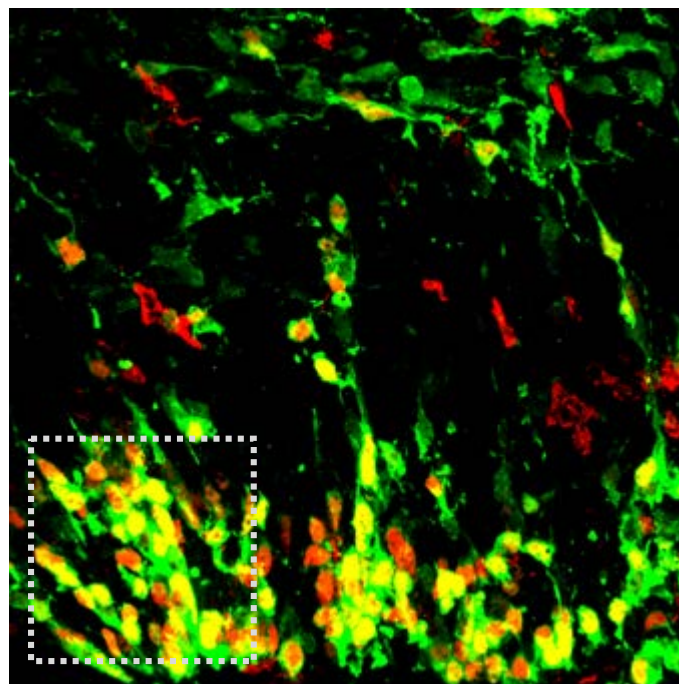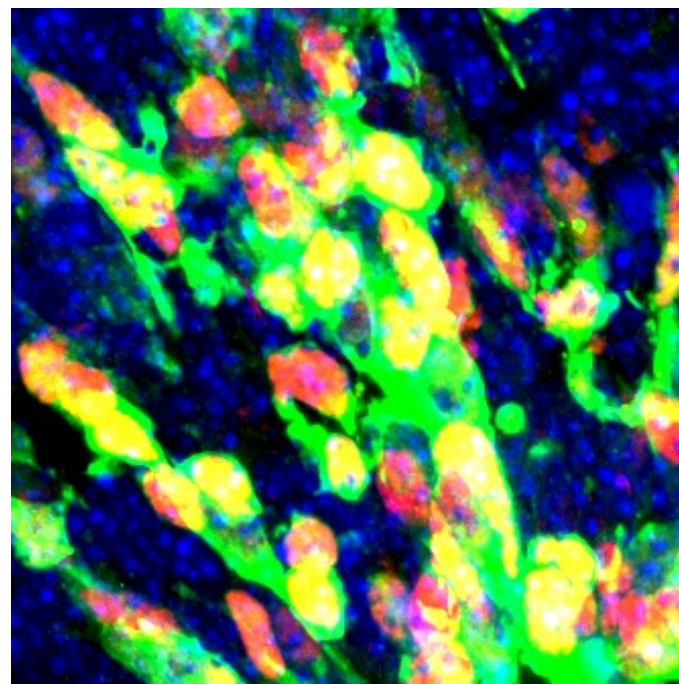

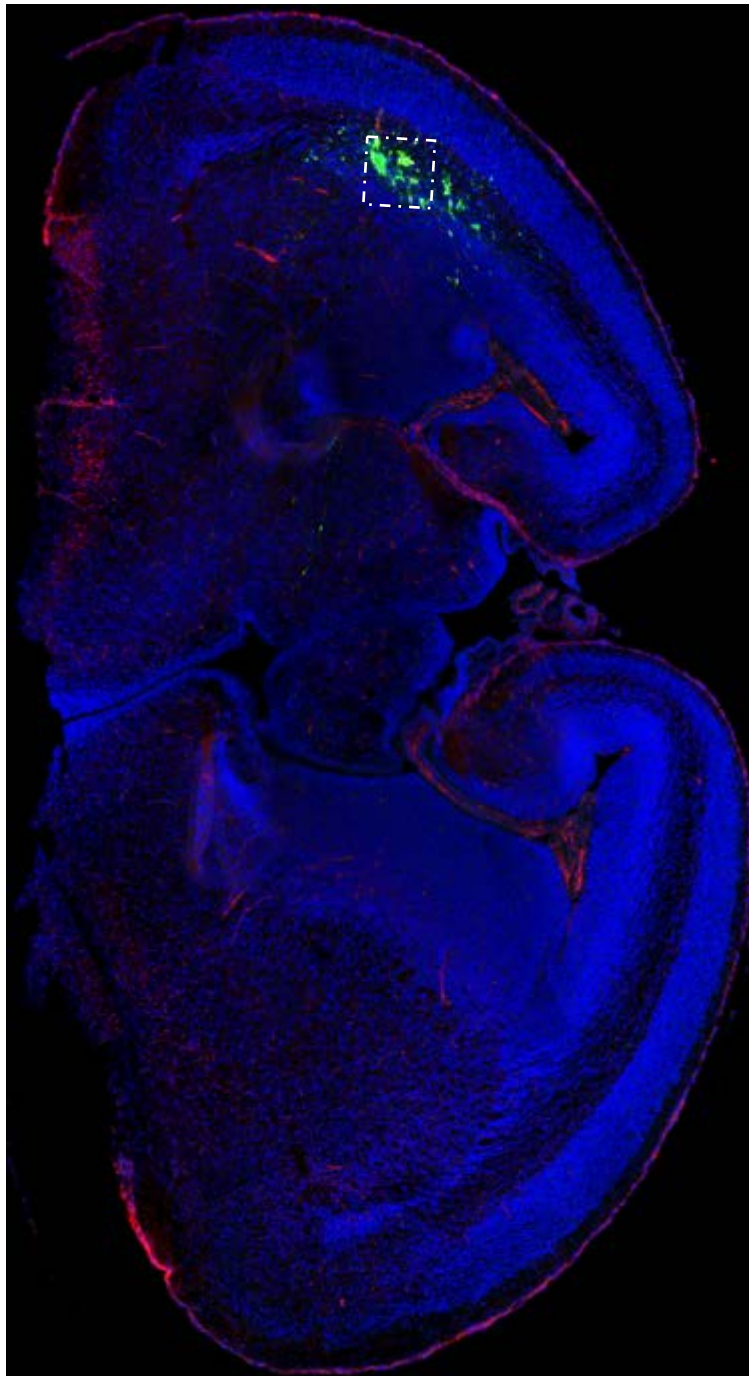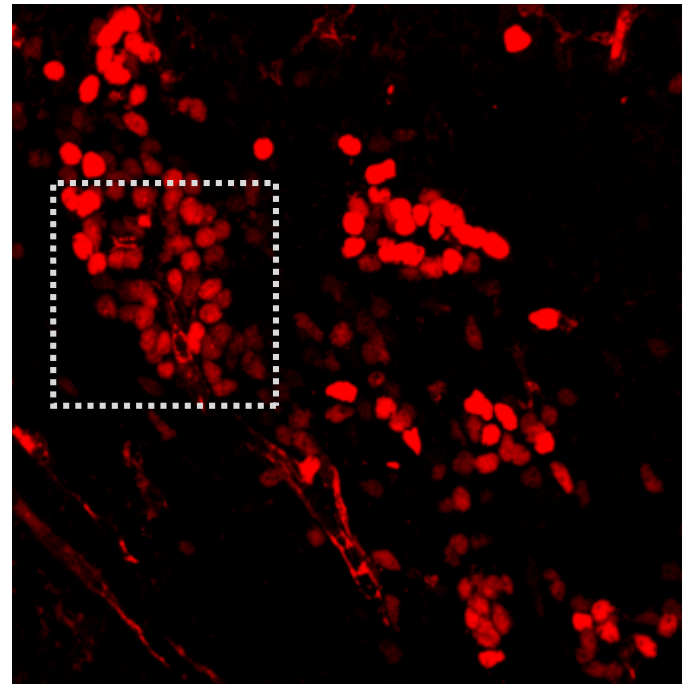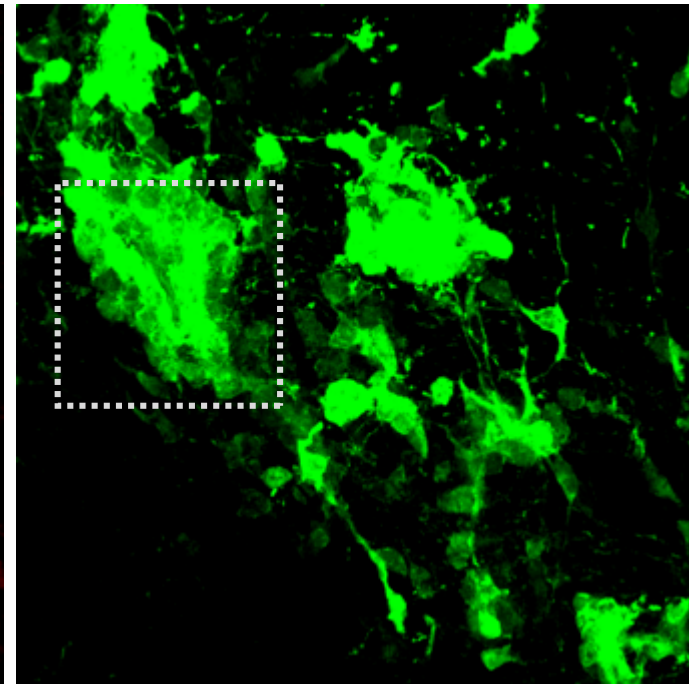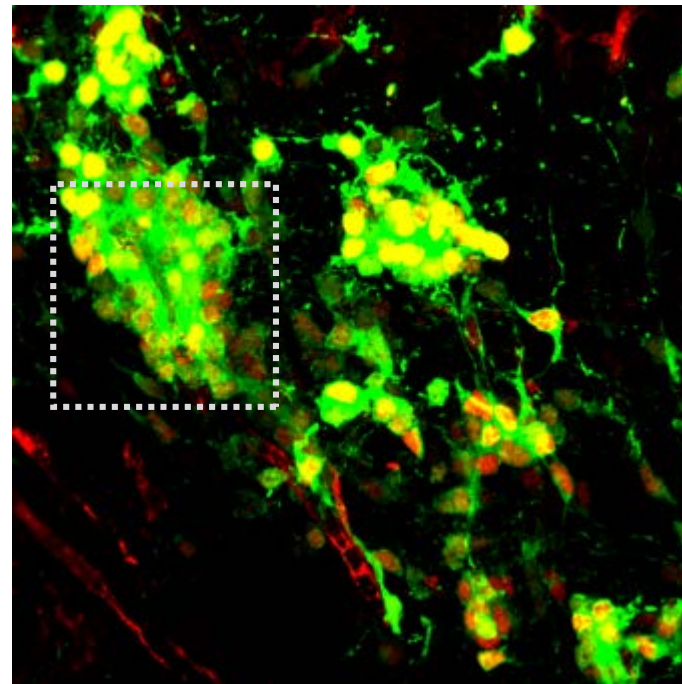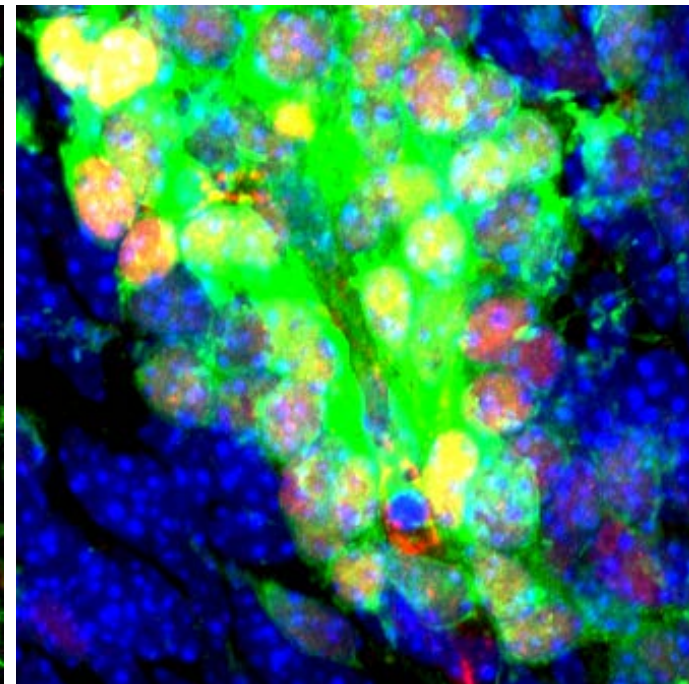

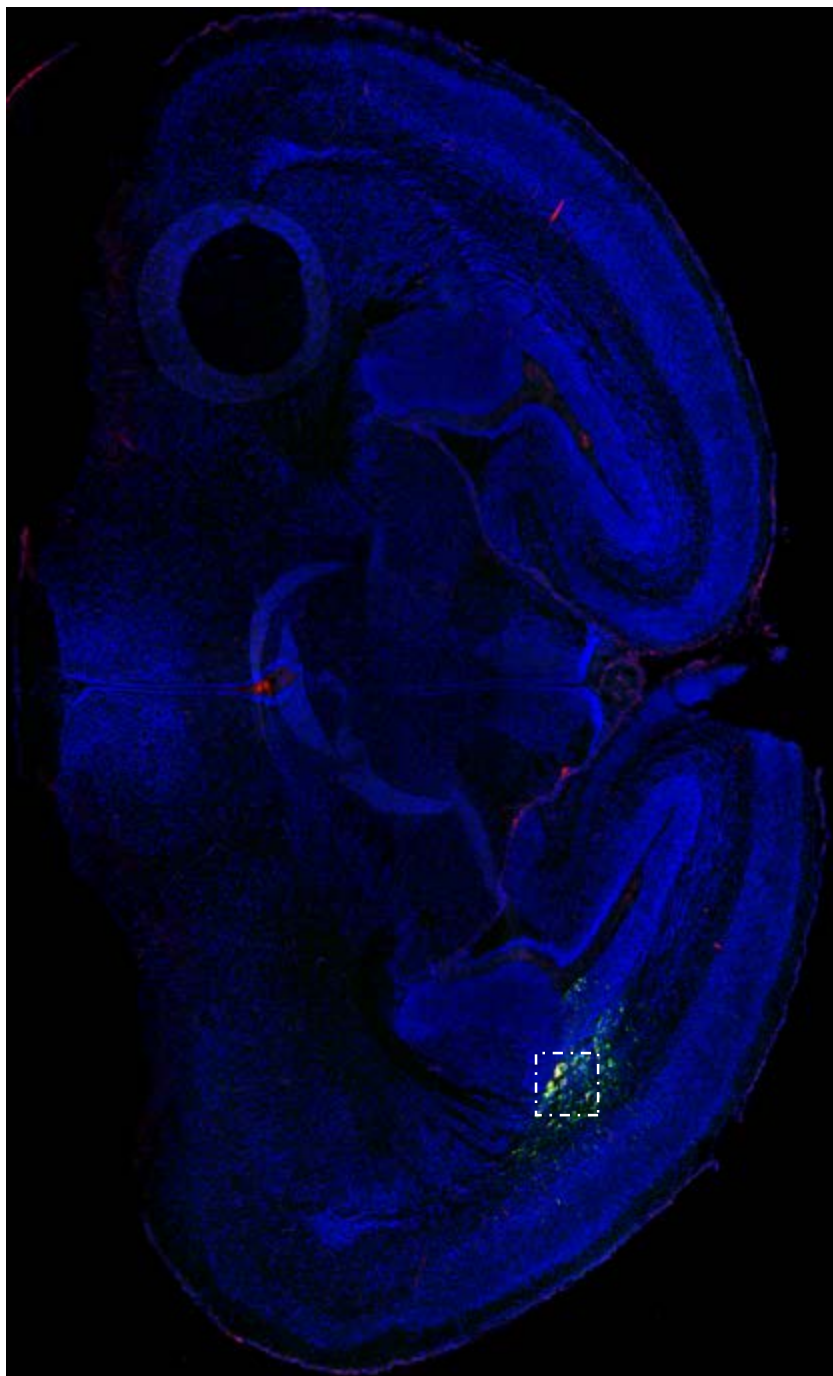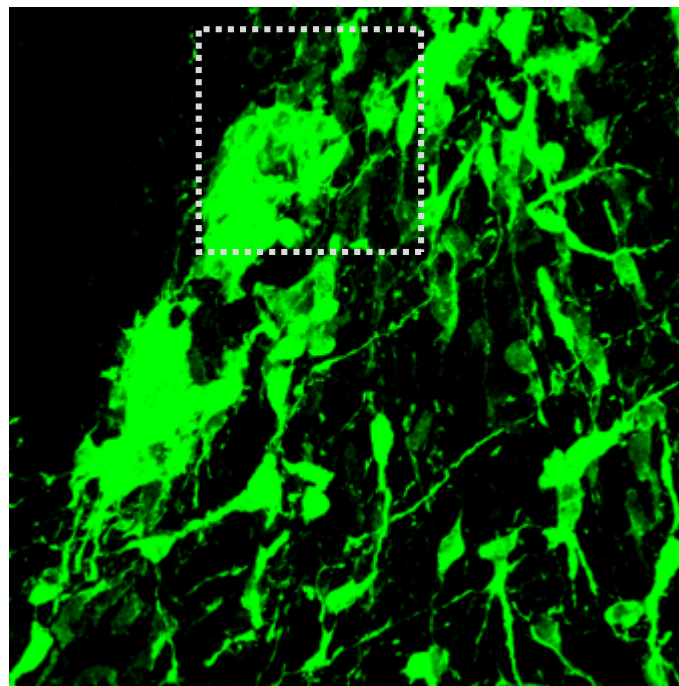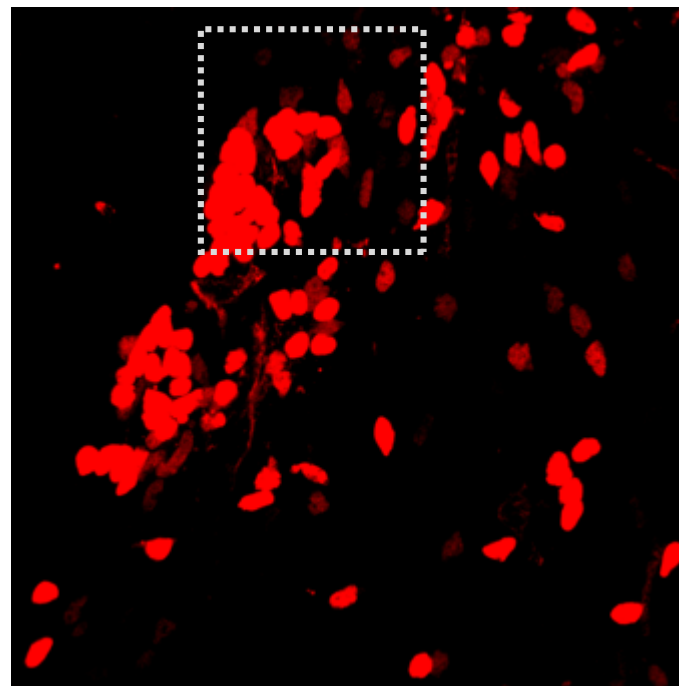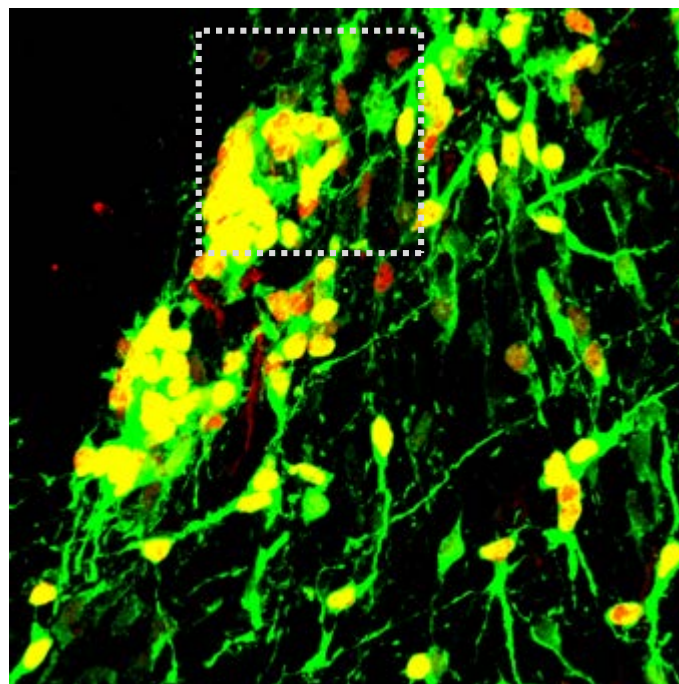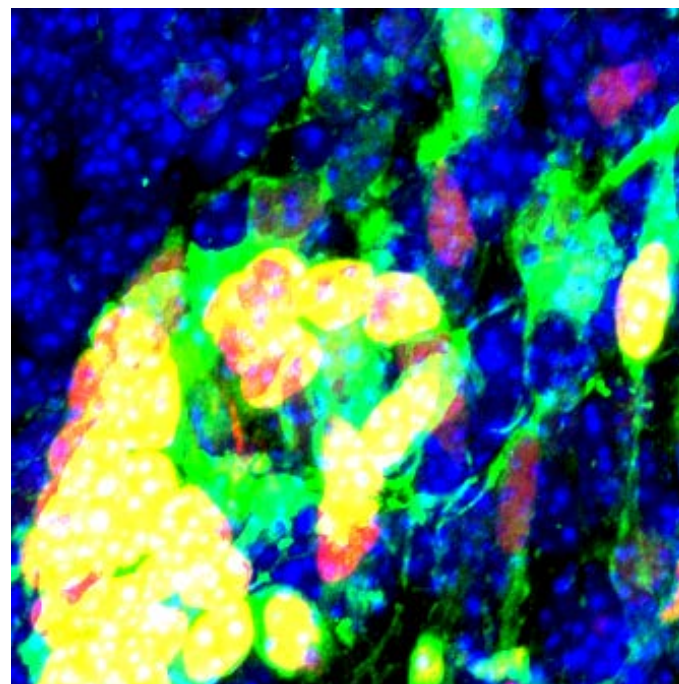

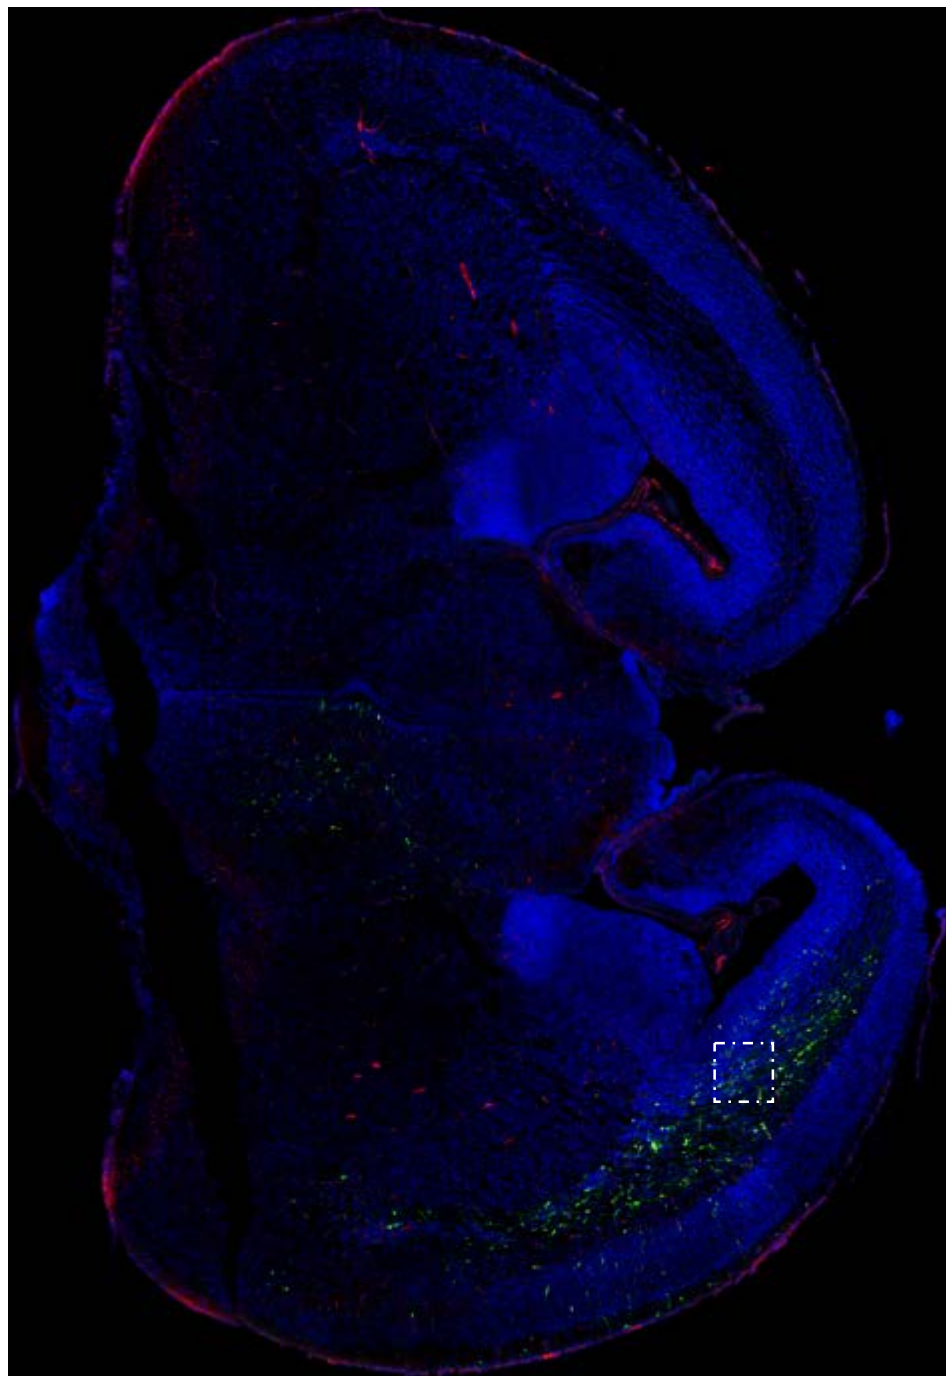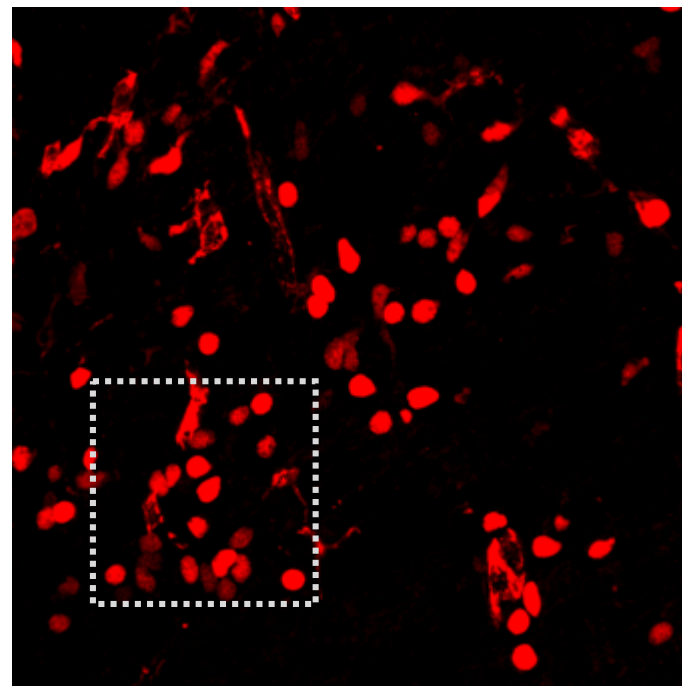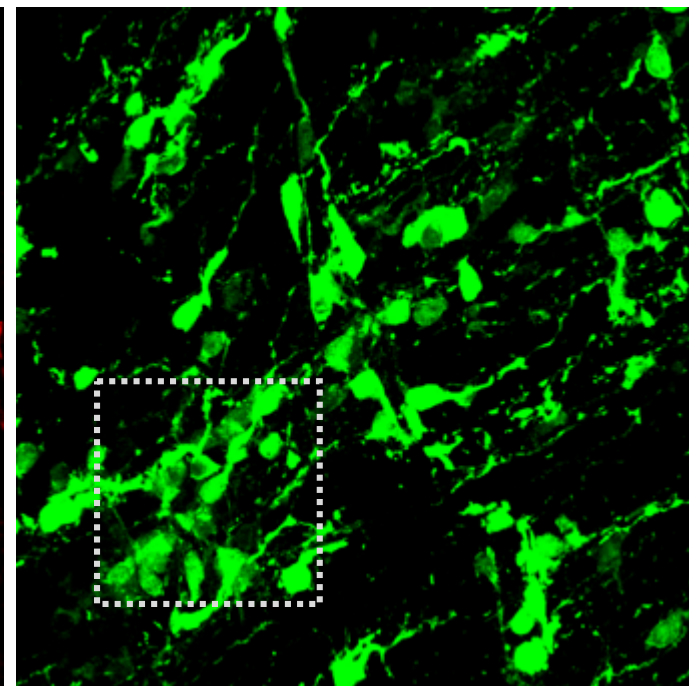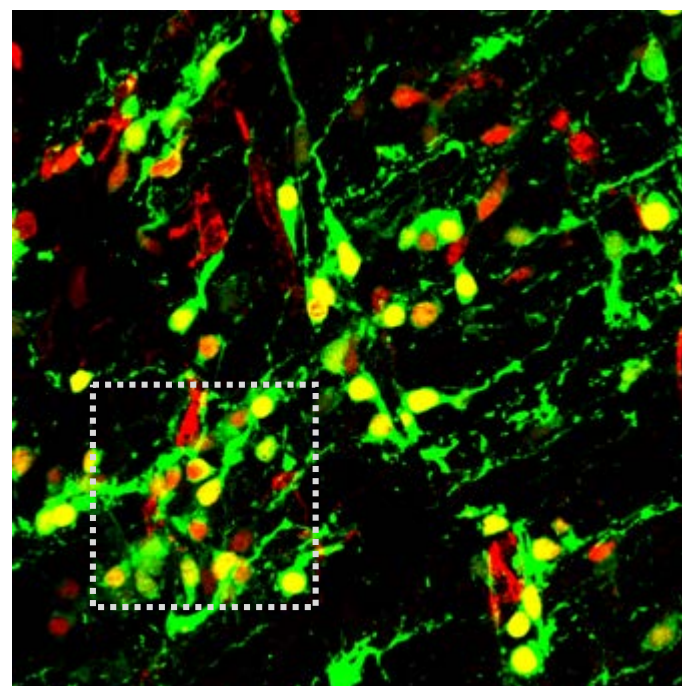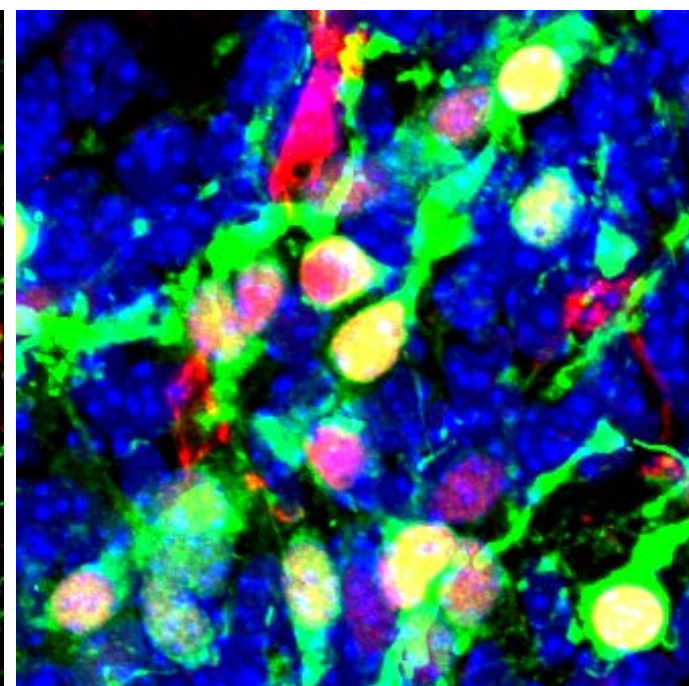

SHOX2-P305L

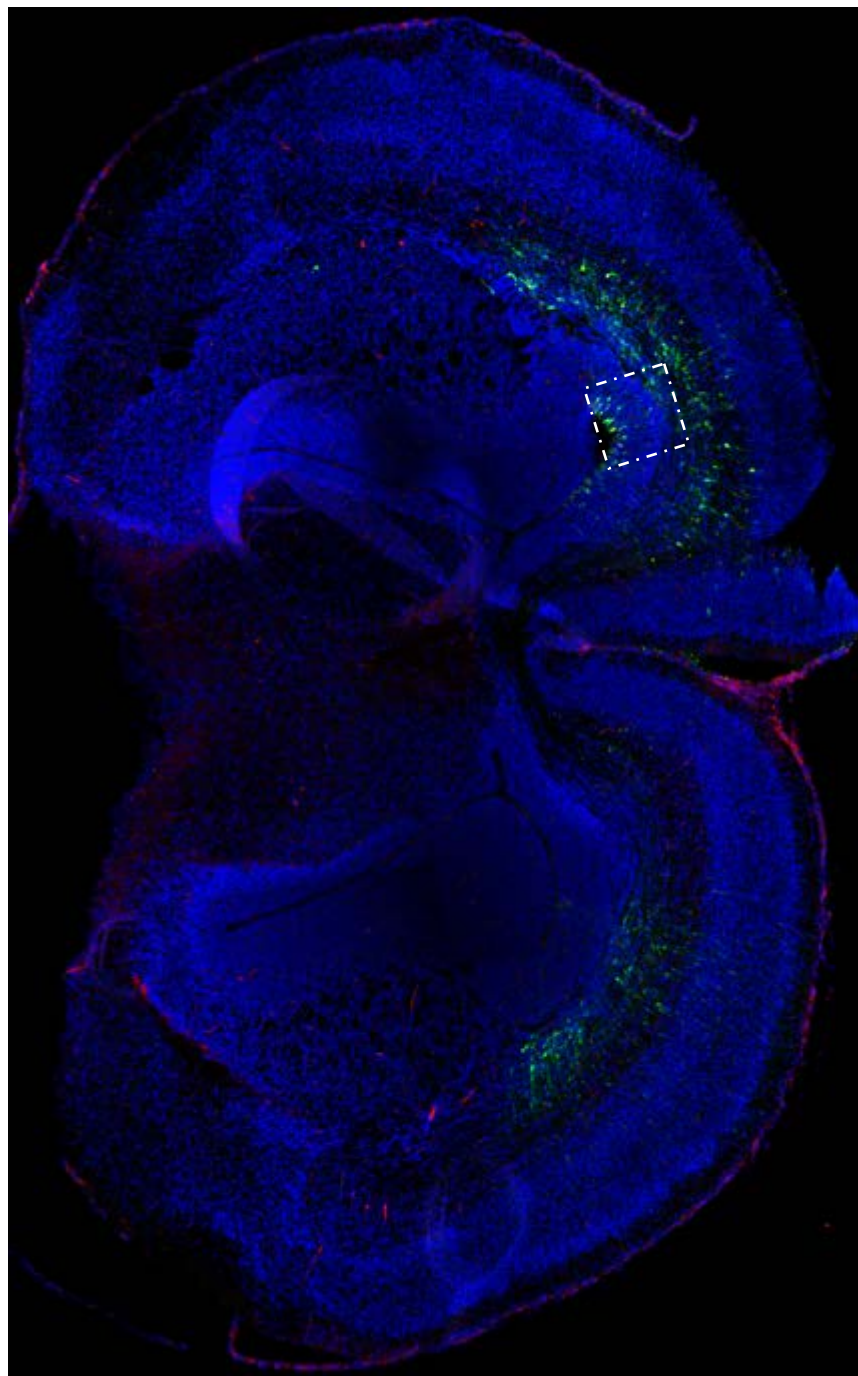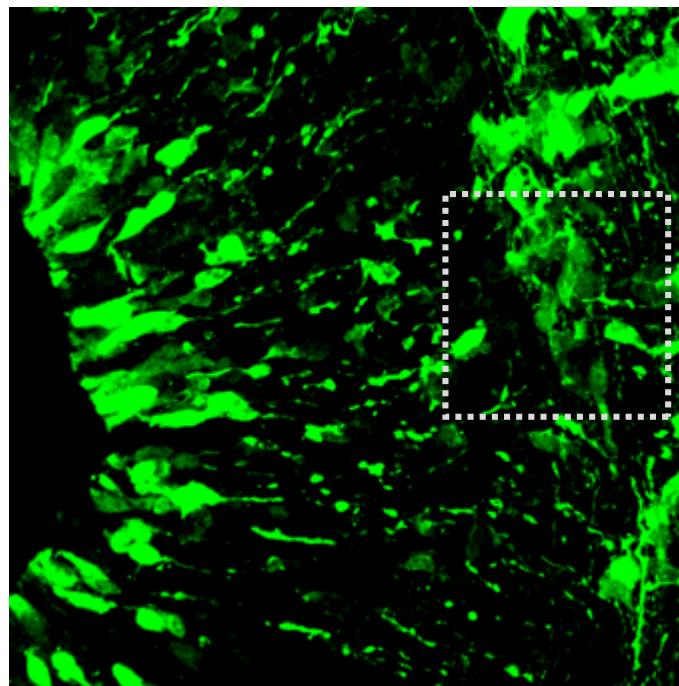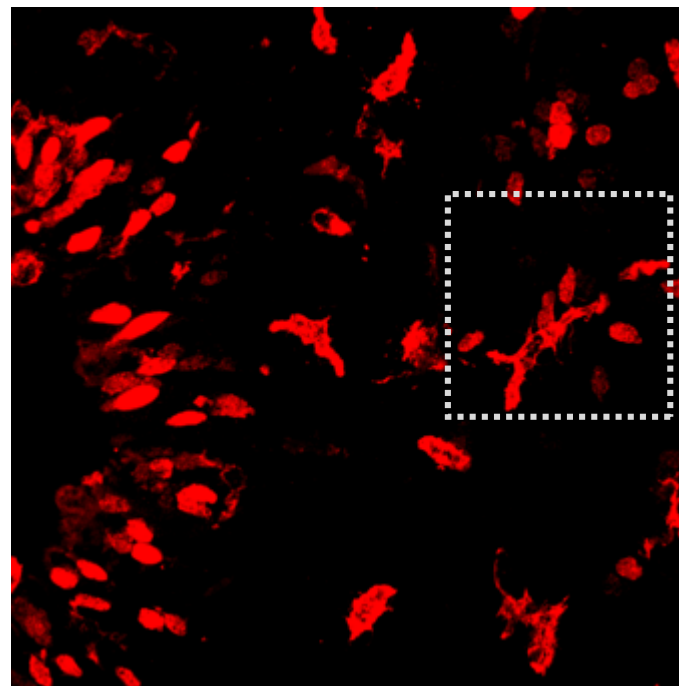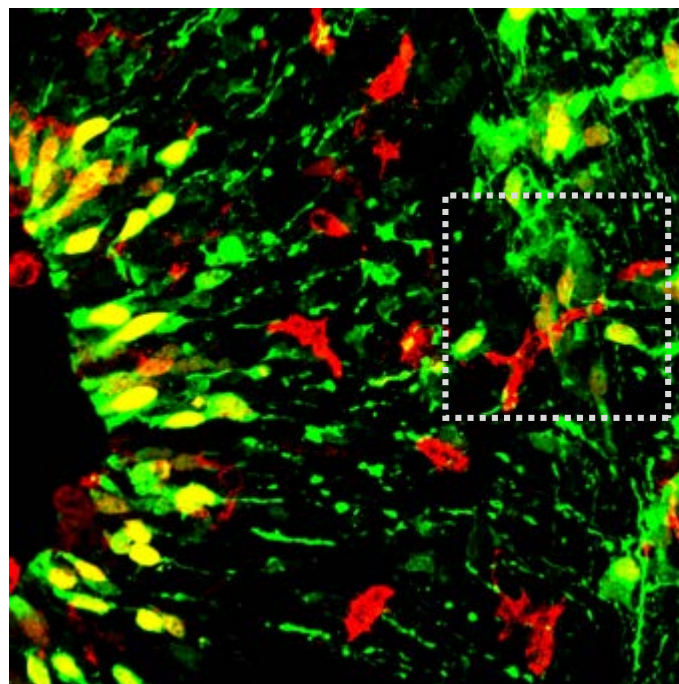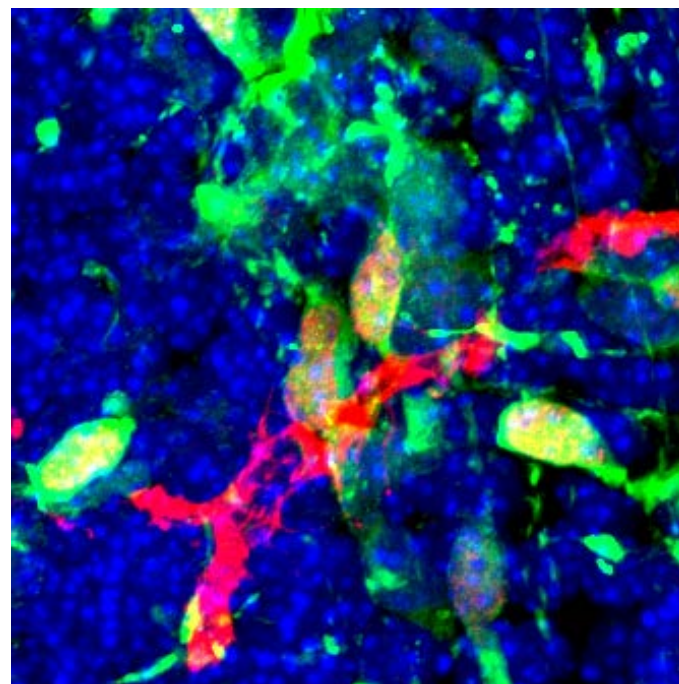

Supplement: NIHMS1832618-supplement-Supplemental_Dataset_3.pdf [file NIHMS1832618-supplement-Supplemental_Dataset_3.pdf]
