# Supplementary material for: Global Analysis of Intercellular Homeodomain Protein Transfer
Source: PubMed Central journal article supplement — Cell Rep. Author manuscript; Available in PMC 2022 Sep 14. (PMC9472292; doi:10.1016/j.celrep.2019.06.056), 2019-07-16
Supplement: NIHMS1832618-supplement-Supplemental_Dataset_1.pdf [file NIHMS1832618-supplement-Supplemental_Dataset_1.pdf]

***Lee et al.\_Supplemental Dataset 1***

DB and WB images for Figure 1 and 2

### 293T

001-022

|       |        |     |
|-------|--------|-----|
| ej001 | ALX4   | A01 |
| ej002 | ARX    | A02 |
| ej003 | BARHL1 | A03 |
| ej004 | BARX1* | A04 |
| ej005 | BARX2  | A05 |
| ej006 | BSX    | A06 |
| ej007 | CDX1   | A07 |
| ej008 | CDX2   | A08 |
| ej009 | CDX4   | A09 |
| ej010 | CRX    | A10 |
| ej011 | CUX1*  | A11 |

|       |       |     |
|-------|-------|-----|
| ej012 | DBX1  | B01 |
| ej013 | DLX1  | B02 |
| ej014 | DLX2  | B03 |
| ej015 | DLX3  | B04 |
| ej016 | DLX4  | B05 |
| ej017 | DLX5  | B06 |
| ej018 | DLX6  | B07 |
| ej019 | DMBX1 | B08 |
| ej020 | MEIS2 | B09 |
| ej021 | EN2   | B10 |
| ej022 | EVX1* | B11 |

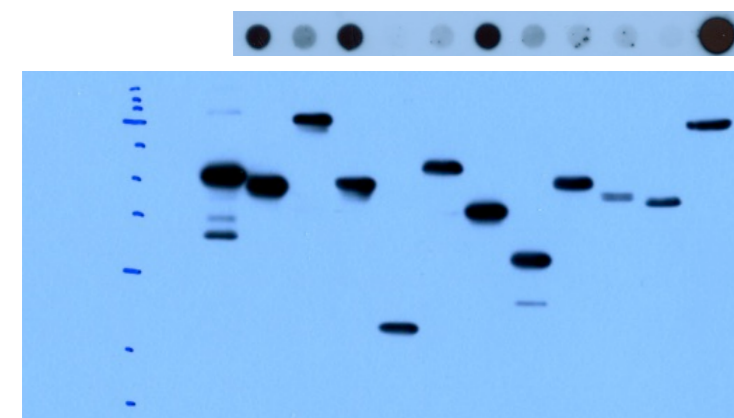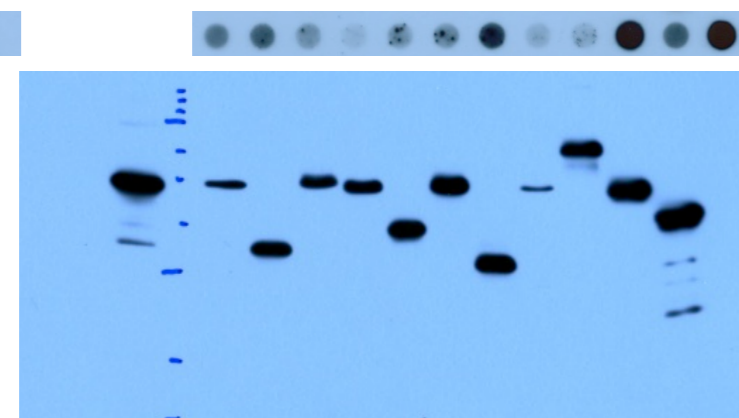

023-033

|       |        |     |
|-------|--------|-----|
| ej023 | EVX2   | C01 |
| ej024 | GBX2   | C02 |
| ej025 | GSC2   | C03 |
| ej026 | GSX2   | C04 |
| ej027 | HDX    | C05 |
| ej028 | HESX1  | C06 |
| ej029 | HHEX   | C07 |
| ej030 | HLX    | C08 |
| ej031 | HMBOX1 | C09 |
| ej032 | HMX2   | C10 |
| ej033 | HNF1B  | C11 |

|       |        |     |
|-------|--------|-----|
| ej034 | HOPX   | D01 |
| ej035 | HOXA1  | D02 |
| ej036 | HOXA3  | D03 |
| ej037 | HOXA5  | D04 |
| ej038 | HOXA6  | D05 |
| ej039 | HOXA9  | D06 |
| ej040 | HOXA10 | D07 |
| ej041 | HOXA11 | D08 |
| ej042 | HOXB1* | D09 |
| ej043 | HOXB2  | D10 |
| ej044 | HOXB2  | D11 |

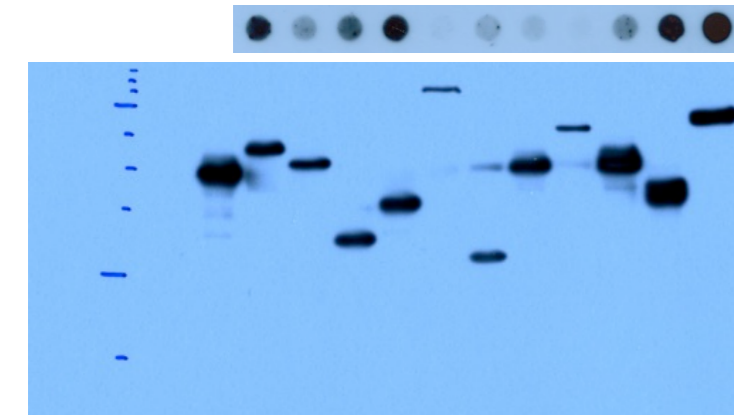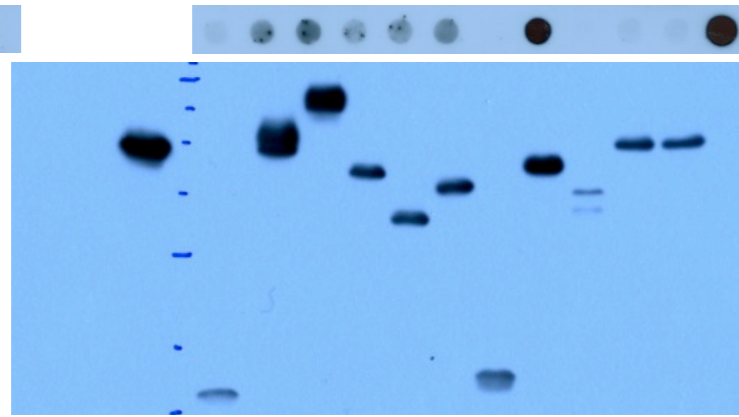

\*Isoform w/o HD  
\*\*No expression

### GT1-7

|       |        |     |
|-------|--------|-----|
| ej001 | ALX4   | A01 |
| ej002 | ARX    | A02 |
| ej003 | BARHL1 | A03 |
| ej004 | BARX1* | A04 |
| ej005 | BARX2  | A05 |
| ej006 | BSX    | A06 |
| ej007 | CDX1   | A07 |
| ej008 | CDX2   | A08 |
| ej009 | CDX4   | A09 |
| ej010 | CRX    | A10 |
| ej011 | CUX1*  | A11 |

|       |       |     |
|-------|-------|-----|
| ej012 | DBX1  | B01 |
| ej013 | DLX1  | B02 |
| ej014 | DLX2  | B03 |
| ej015 | DLX3  | B04 |
| ej016 | DLX4  | B05 |
| ej017 | DLX5  | B06 |
| ej018 | DLX6  | B07 |
| ej019 | DMBX1 | B08 |
| ej020 | MEIS2 | B09 |
| ej021 | EN2   | B10 |
| ej022 | EVX1* | B11 |

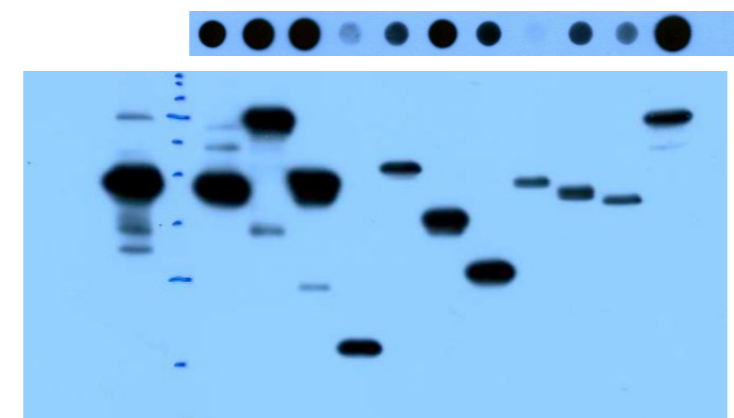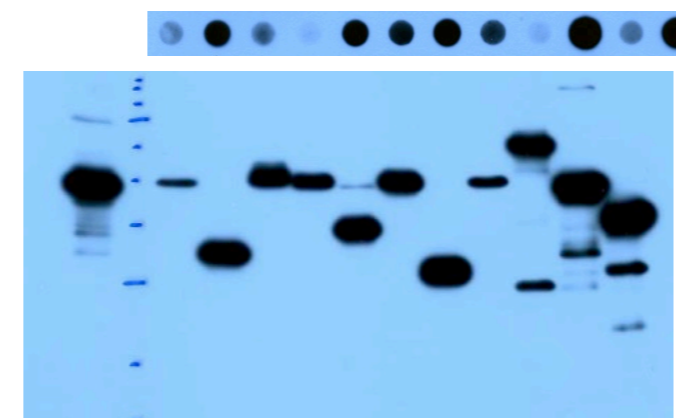

|       |        |     |
|-------|--------|-----|
| ej023 | EVX2   | C01 |
| ej024 | GBX2   | C02 |
| ej025 | GSC2   | C03 |
| ej026 | GSX2   | C04 |
| ej027 | HDX    | C05 |
| ej028 | HESX1  | C06 |
| ej029 | HHEX   | C07 |
| ej030 | HLX    | C08 |
| ej031 | HMBOX1 | C09 |
| ej032 | HMX2   | C10 |
| ej033 | HNF1B  | C11 |

|       |        |     |
|-------|--------|-----|
| ej034 | HOPX   | D01 |
| ej035 | HOXA1  | D02 |
| ej036 | HOXA3  | D03 |
| ej037 | HOXA5  | D04 |
| ej038 | HOXA6  | D05 |
| ej039 | HOXA9  | D06 |
| ej040 | HOXA10 | D07 |
| ej041 | HOXA11 | D08 |
| ej042 | HOXB1* | D09 |
| ej043 | HOXB2  | D10 |
| ej044 | HOXB2  | D11 |

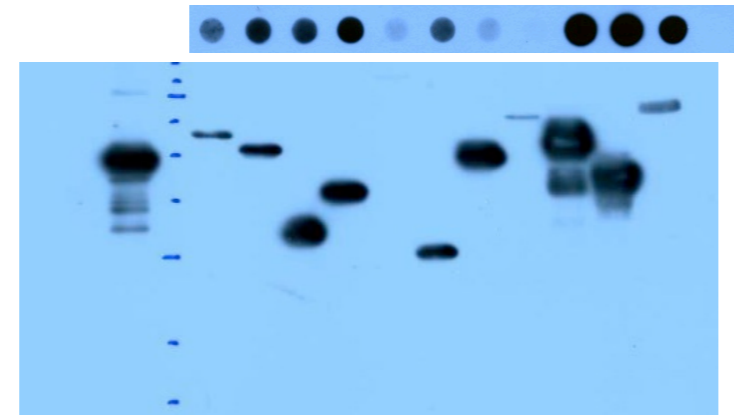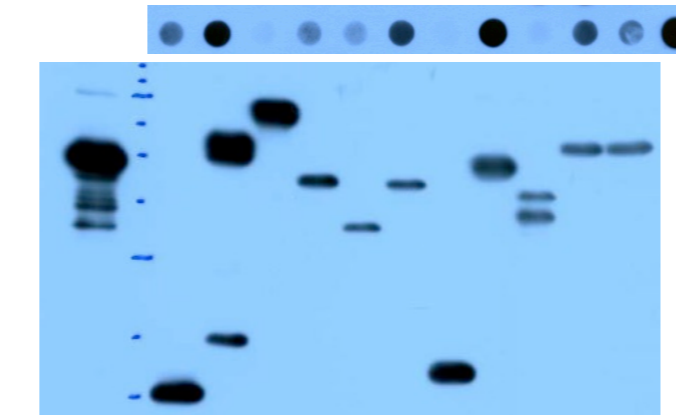

\*Isoform w/o HD  
\*\*No expression

### MDCK

|       |        |     |
|-------|--------|-----|
| ej001 | ALX4   | A01 |
| ej002 | ARX    | A02 |
| ej003 | BARHL1 | A03 |
| ej004 | BARX1* | A04 |
| ej005 | BARX2  | A05 |
| ej006 | BSX    | A06 |
| ej007 | CDX1   | A07 |
| ej008 | CDX2   | A08 |
| ej009 | CDX4   | A09 |
| ej010 | CRX    | A10 |
| ej011 | CUX1*  | A11 |

|       |       |     |
|-------|-------|-----|
| ej012 | DBX1  | B01 |
| ej013 | DLX1  | B02 |
| ej014 | DLX2  | B03 |
| ej015 | DLX3  | B04 |
| ej016 | DLX4  | B05 |
| ej017 | DLX5  | B06 |
| ej018 | DLX6  | B07 |
| ej019 | DMBX1 | B08 |
| ej020 | MEIS2 | B09 |
| ej021 | EN2   | B10 |
| ej022 | EVX1* | B11 |

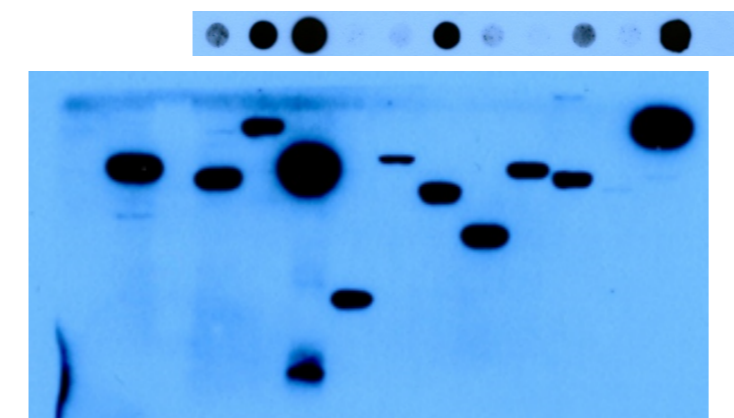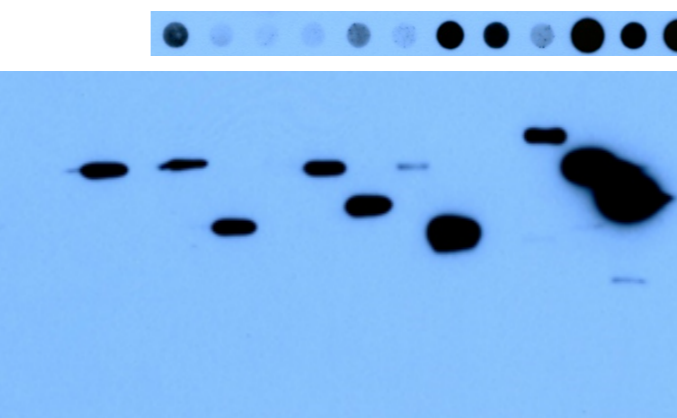

|       |        |     |
|-------|--------|-----|
| ej023 | EVX2   | C01 |
| ej024 | GBX2   | C02 |
| ej025 | GSC2   | C03 |
| ej026 | GSX2   | C04 |
| ej027 | HDX    | C05 |
| ej028 | HESX1  | C06 |
| ej029 | HHEX   | C07 |
| ej030 | HLX    | C08 |
| ej031 | HMBOX1 | C09 |
| ej032 | HMX2   | C10 |
| ej033 | HNF1B  | C11 |

|       |        |     |
|-------|--------|-----|
| ej034 | HOPX   | D01 |
| ej035 | HOXA1  | D02 |
| ej036 | HOXA3  | D03 |
| ej037 | HOXA5  | D04 |
| ej038 | HOXA6  | D05 |
| ej039 | HOXA9  | D06 |
| ej040 | HOXA10 | D07 |
| ej041 | HOXA11 | D08 |
| ej042 | HOXB1* | D09 |
| ej043 | HOXB2  | D10 |
| ej044 | HOXB2  | D11 |

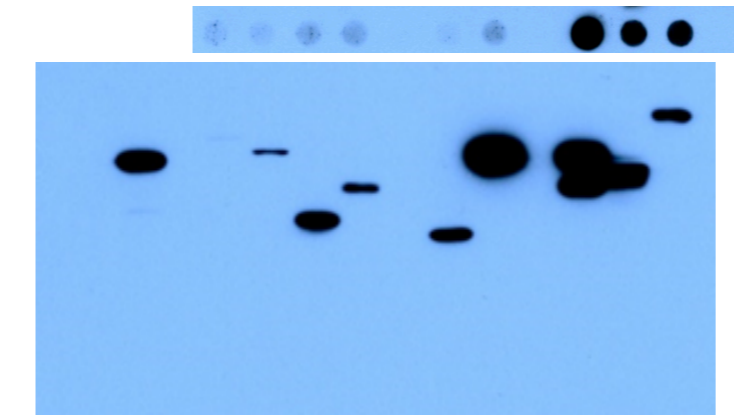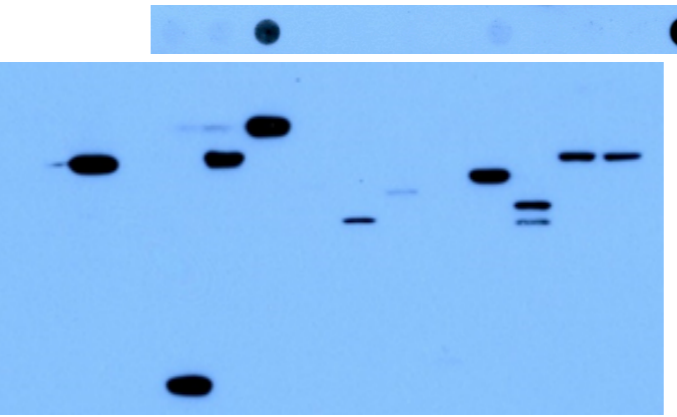

\*Isoform w/o HD  
\*\*No expression

### HeLa

|       |        |     |
|-------|--------|-----|
| ej001 | ALX4   | A01 |
| ej002 | ARX    | A02 |
| ej003 | BARHL1 | A03 |
| ej004 | BARX1* | A04 |
| ej005 | BARX2  | A05 |
| ej006 | BSX    | A06 |
| ej007 | CDX1   | A07 |
| ej008 | CDX2   | A08 |
| ej009 | CDX4   | A09 |
| ej010 | CRX    | A10 |
| ej011 | CUX1*  | A11 |

|       |       |     |
|-------|-------|-----|
| ej012 | DBX1  | B01 |
| ej013 | DLX1  | B02 |
| ej014 | DLX2  | B03 |
| ej015 | DLX3  | B04 |
| ej016 | DLX4  | B05 |
| ej017 | DLX5  | B06 |
| ej018 | DLX6  | B07 |
| ej019 | DMBX1 | B08 |
| ej020 | MEIS2 | B09 |
| ej021 | EN2   | B10 |
| ej022 | EVX1* | B11 |

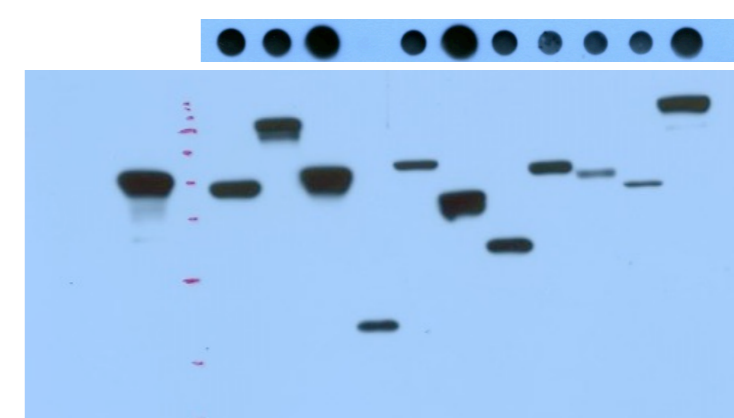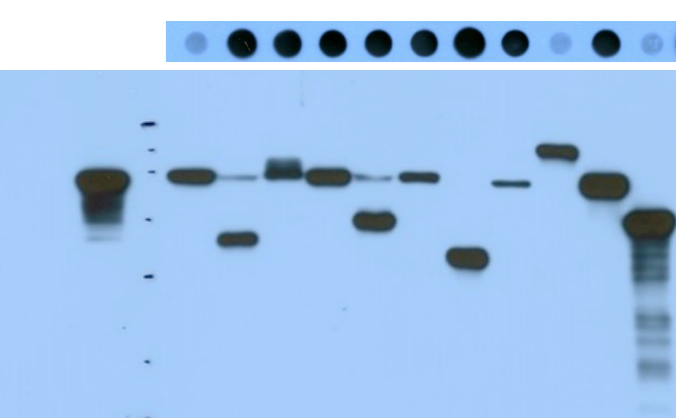

|       |        |     |
|-------|--------|-----|
| ej023 | EVX2   | C01 |
| ej024 | GBX2   | C02 |
| ej025 | GSC2   | C03 |
| ej026 | GSX2   | C04 |
| ej027 | HDX    | C05 |
| ej028 | HESX1  | C06 |
| ej029 | HHEX   | C07 |
| ej030 | HLX**  | C08 |
| ej031 | HMBOX1 | C09 |
| ej032 | HMX2   | C10 |
| ej033 | HNF1B  | C11 |

|       |          |     |
|-------|----------|-----|
| ej034 | HOPX     | D01 |
| ej035 | HOXA1    | D02 |
| ej036 | HOXA3    | D03 |
| ej037 | HOXA5    | D04 |
| ej038 | HOXA6    | D05 |
| ej039 | HOXA9    | D06 |
| ej040 | HOXA10** | D07 |
| ej041 | HOXA11   | D08 |
| ej042 | HOXB1*   | D09 |
| ej043 | HOXB2    | D10 |
| ej044 | HOXB2    | D11 |

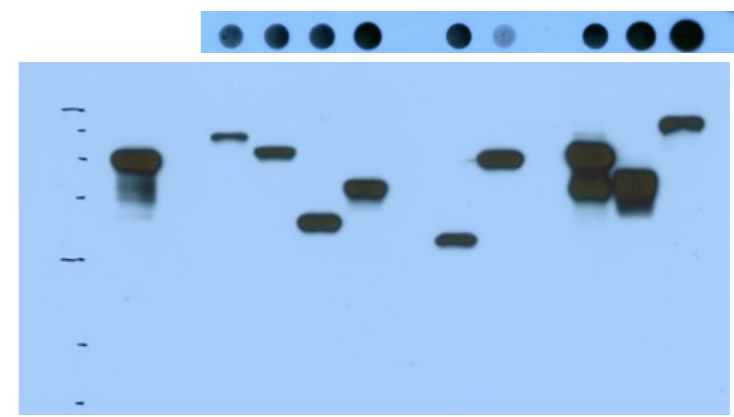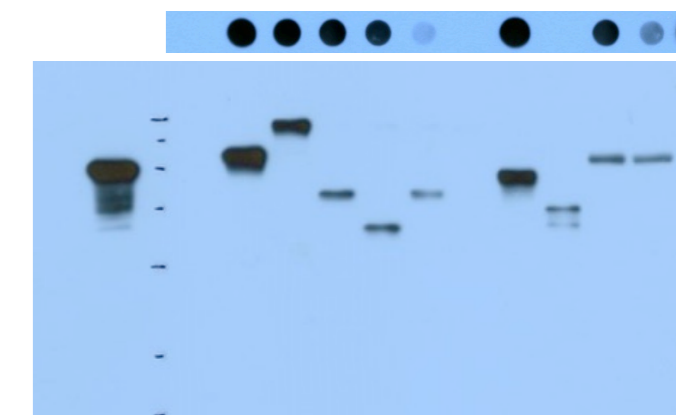

\*Isoform w/o HD  
\*\*Not expressed



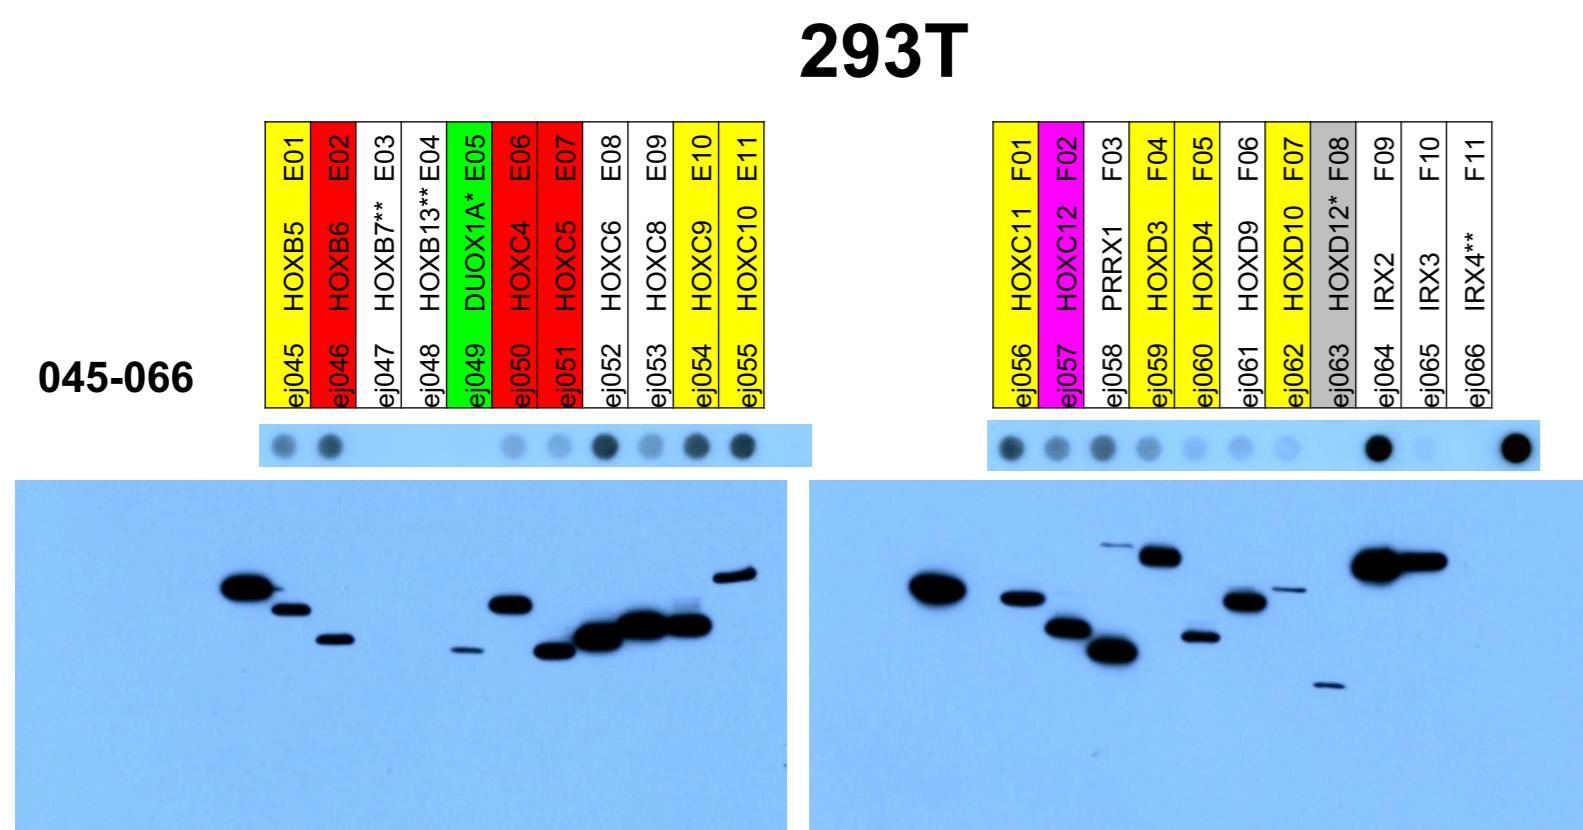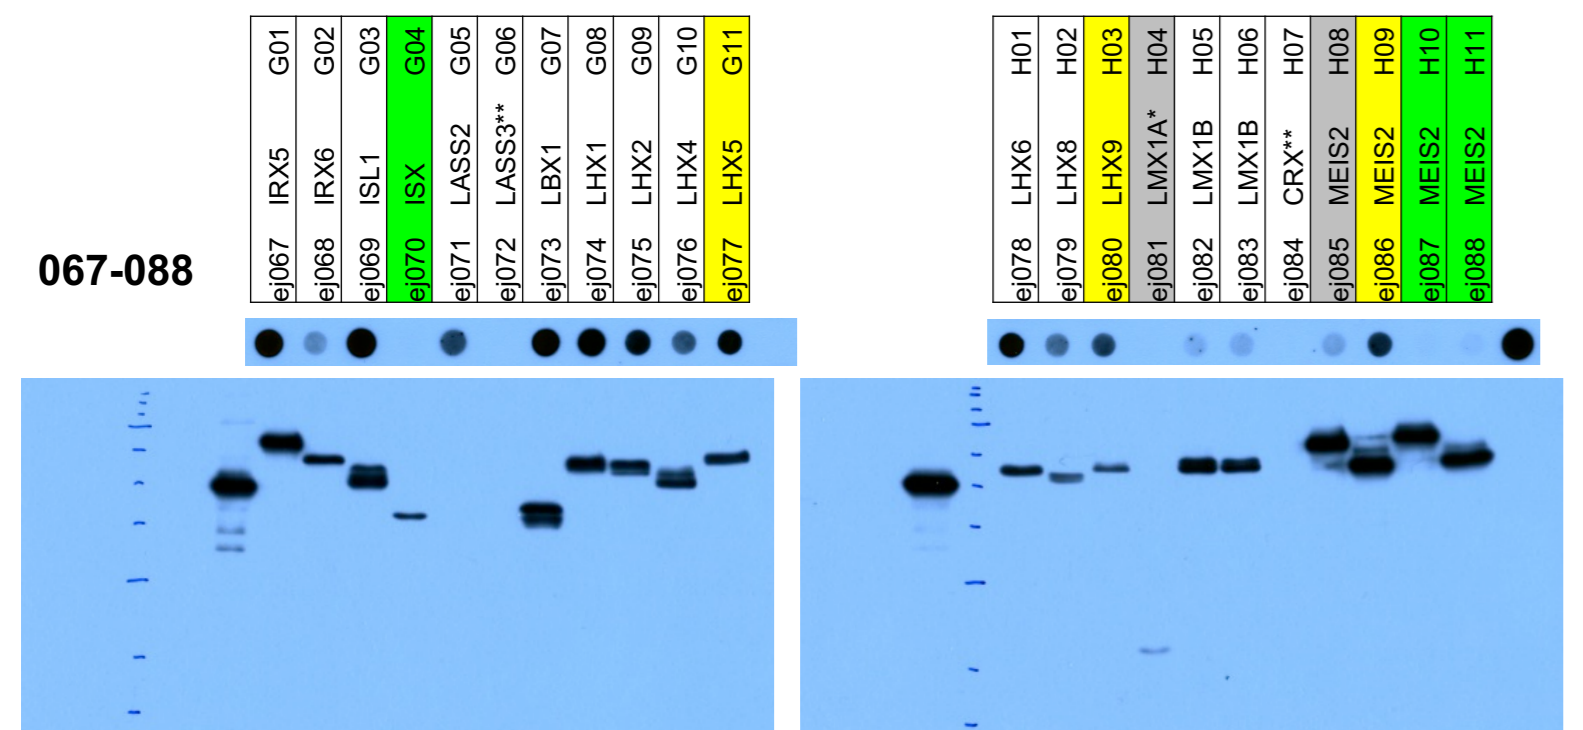

\*Isoform w/o HD  
\*\*No expression

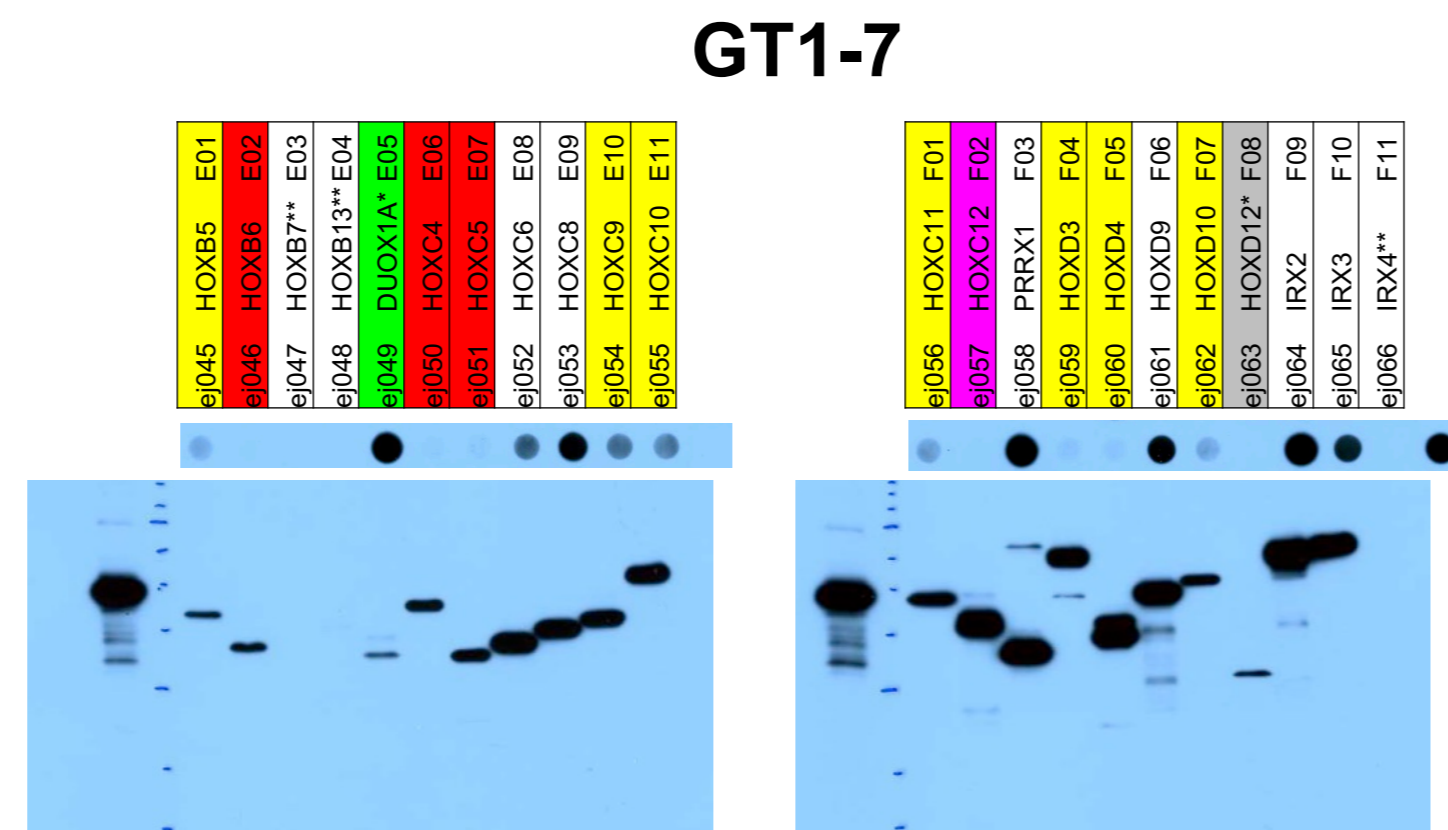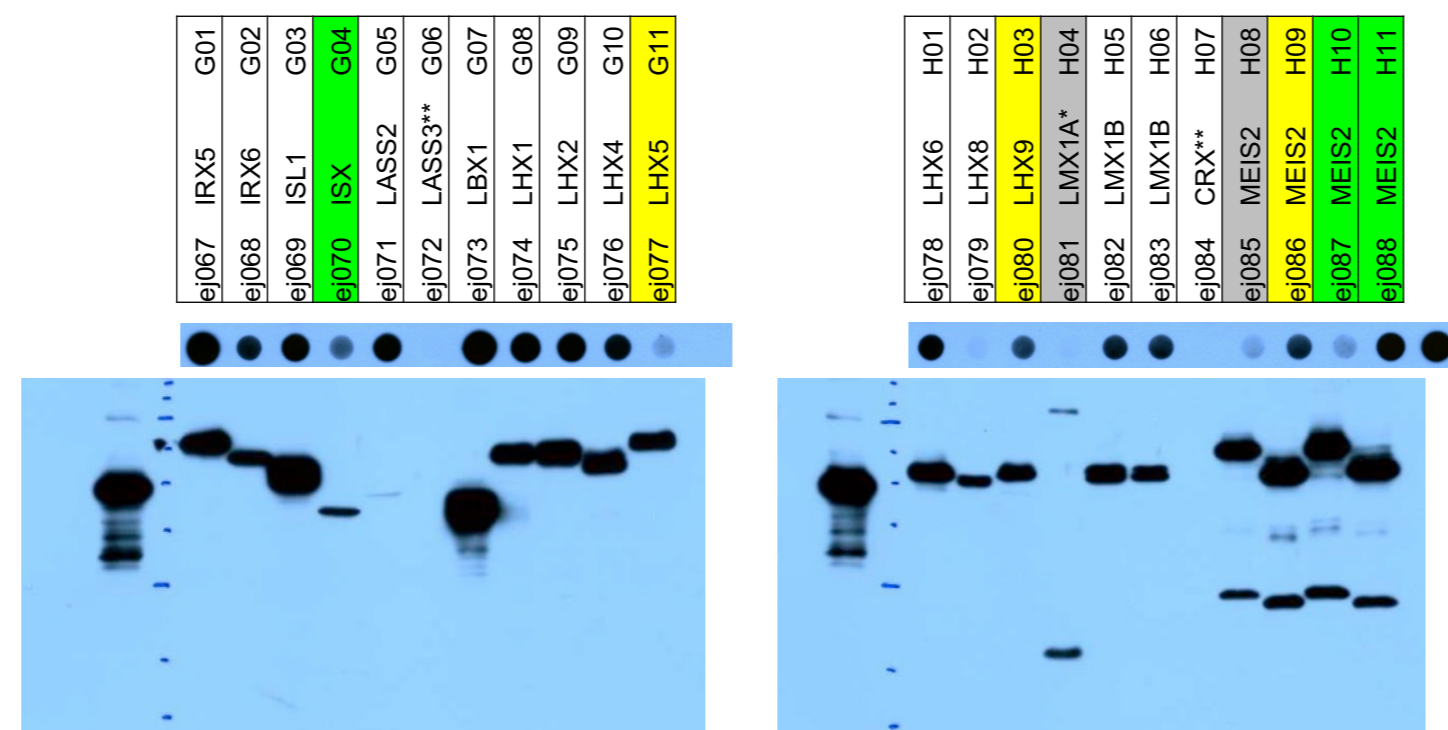

\*Isoform w/o HD  
\*\*No expression

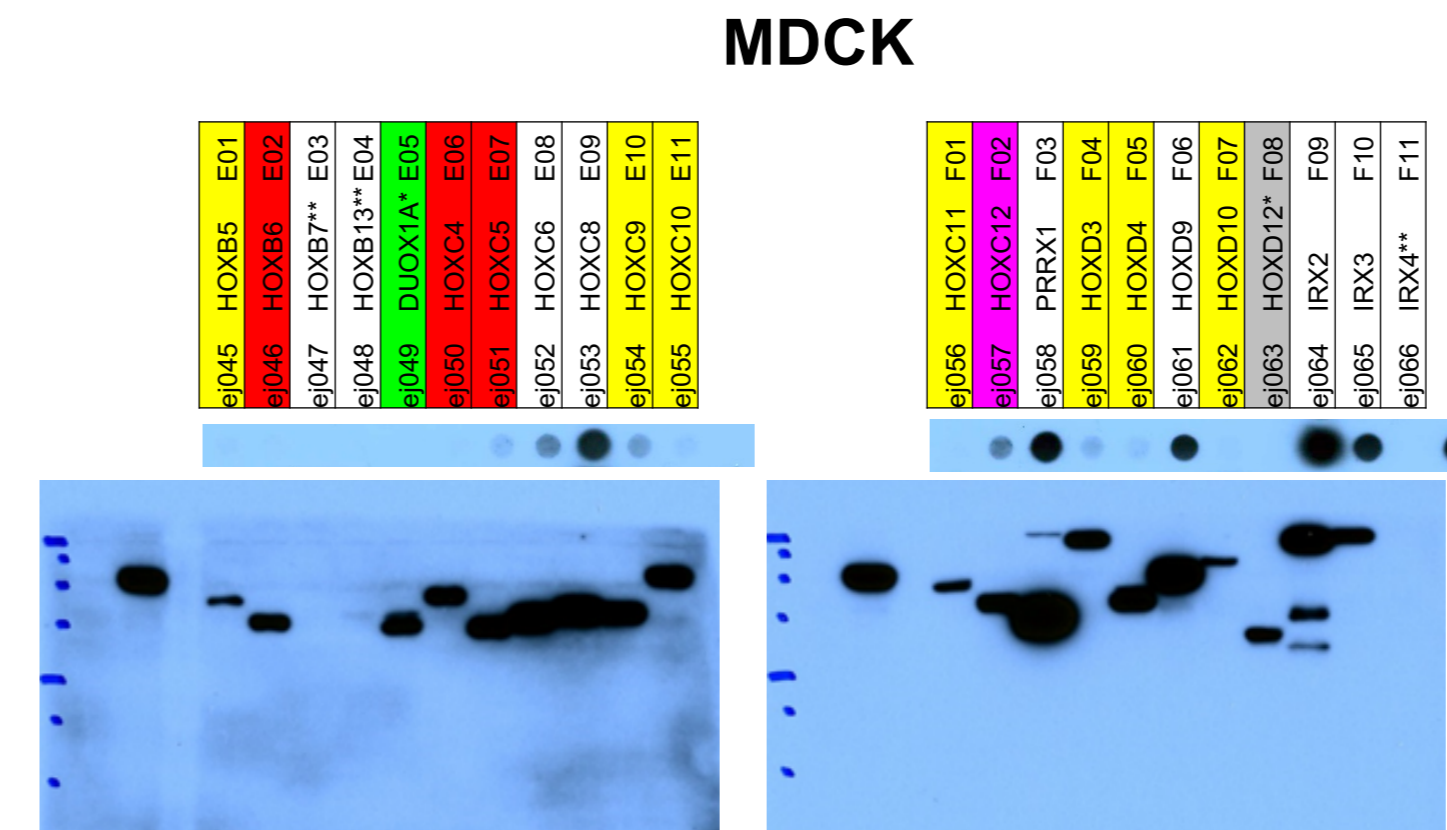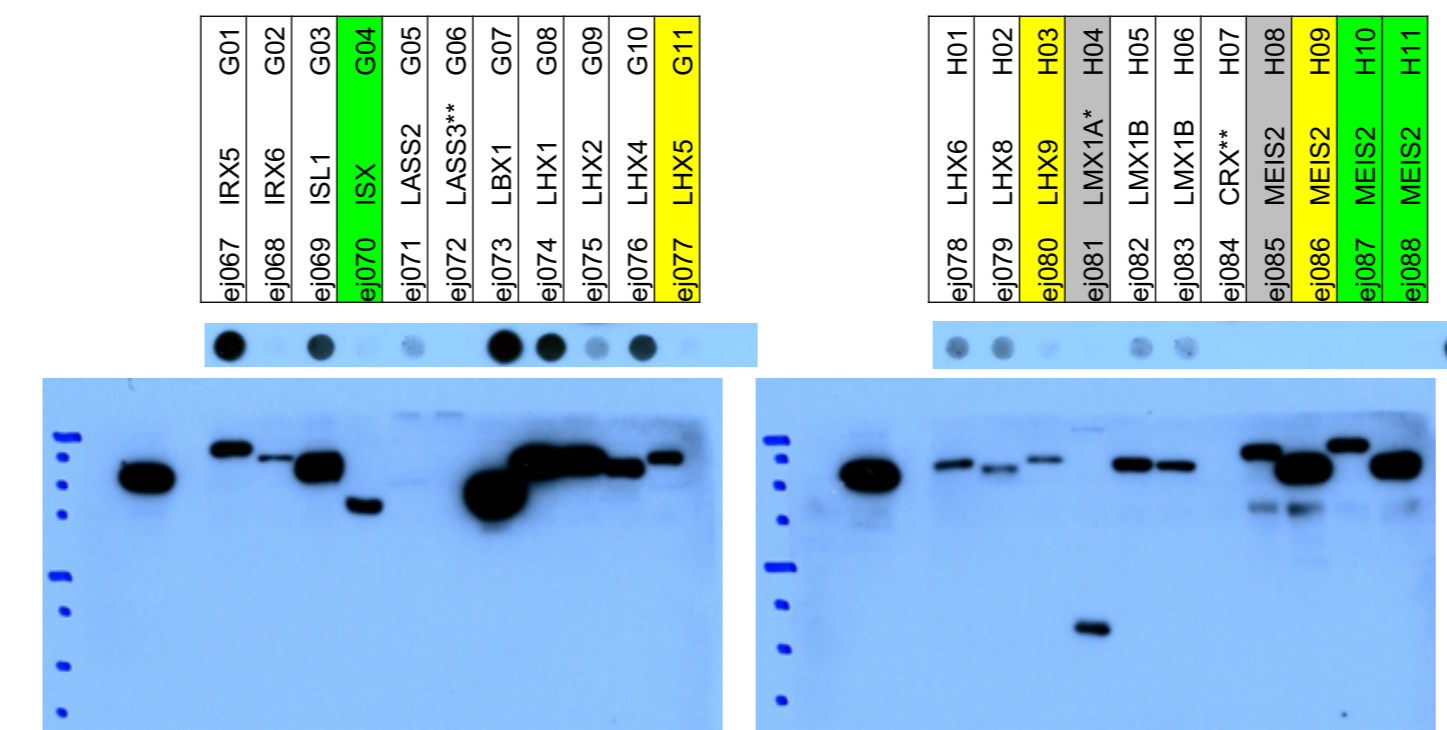

\*Isoform w/o HD  
\*\*No expression

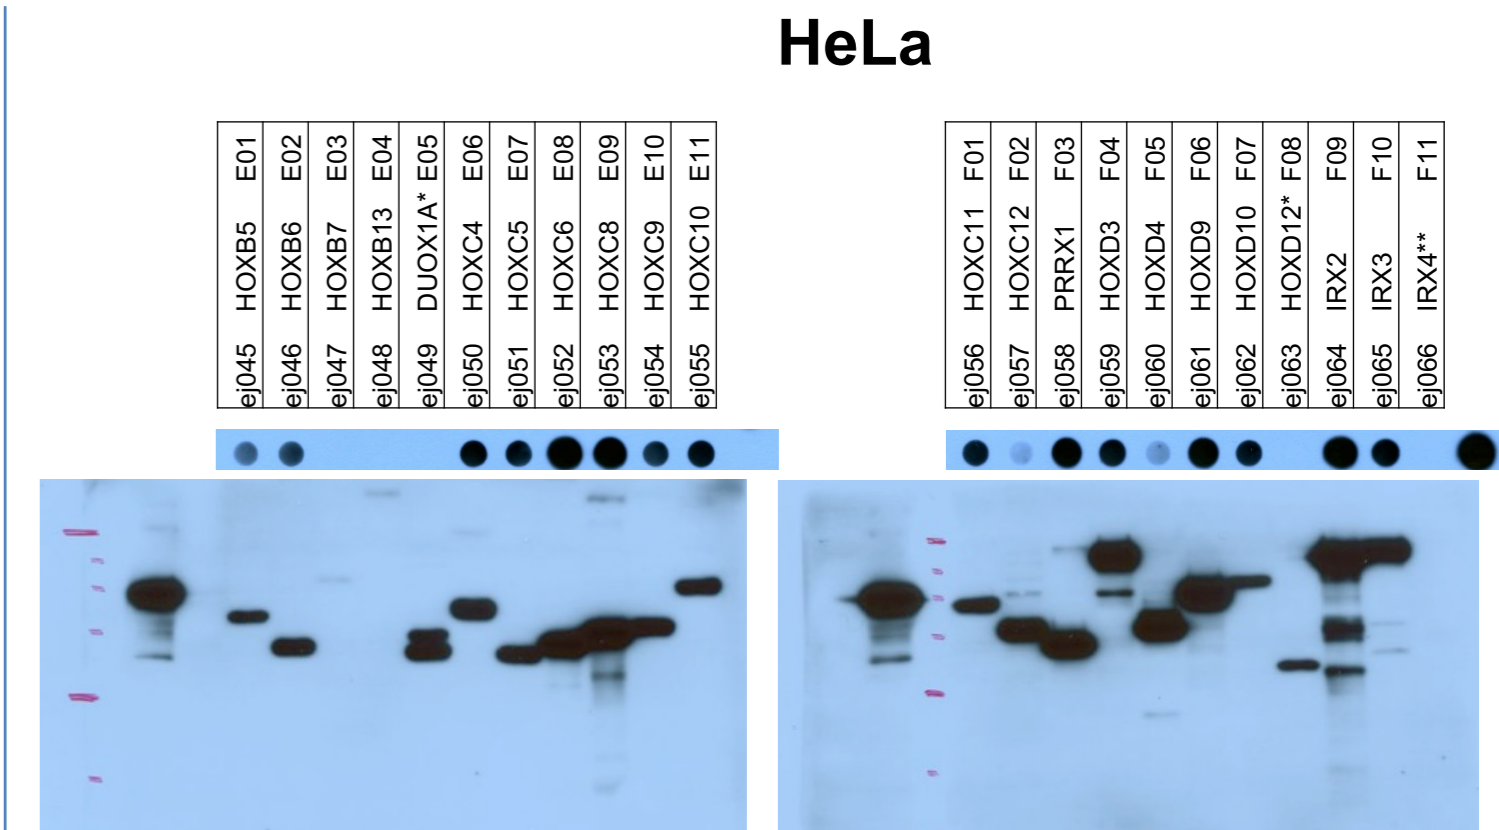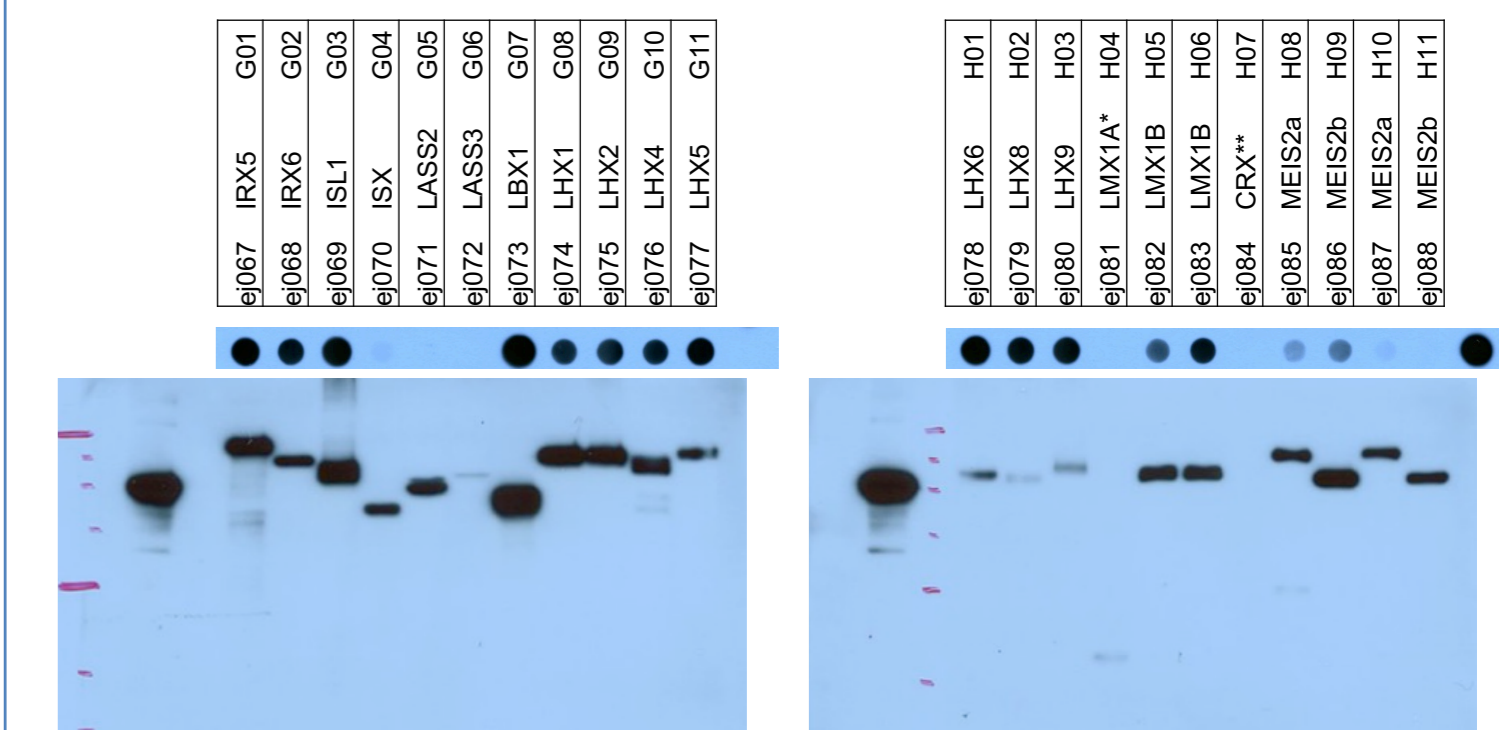

\*Isoform w/o HD  
\*\*Not expressed



### 293T

089-110

|       |        |     |
|-------|--------|-----|
| ej089 | MEIS3  | I01 |
| ej090 | MEIS3  | I02 |
| ej091 | MEOX1  | I03 |
| ej092 | MEOX2  | I04 |
| ej093 | MIXL1  | I05 |
| ej094 | MKX    | I06 |
| ej095 | MSX1   | I07 |
| ej096 | NANOG  | I08 |
| ej097 | NKX2-1 | I09 |
| ej098 | NKX2-2 | I10 |
| ej099 | NKX2-3 | I11 |

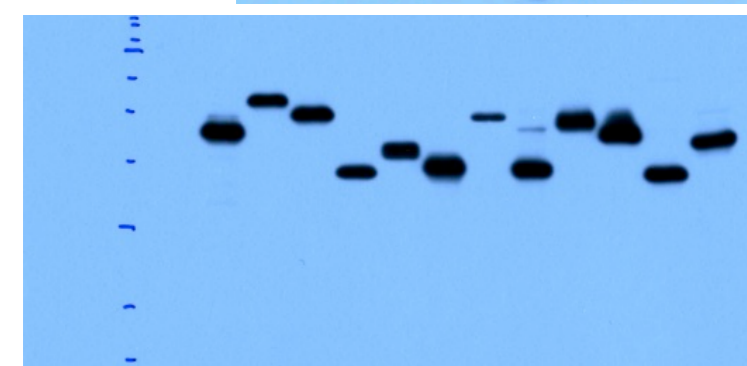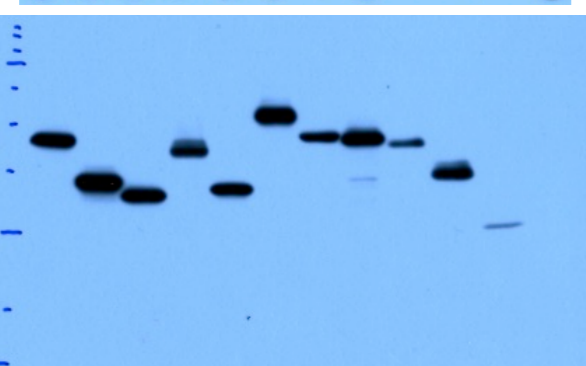

111-132

|       |        |     |
|-------|--------|-----|
| ej111 | PAX3*  | K01 |
| ej112 | PAX3   | K02 |
| ej113 | PAX4** | K03 |
| ej114 | PAX5*  | K04 |
| ej115 | PAX6   | K05 |
| ej116 | PAX7   | K06 |
| ej117 | PAX8*  | K07 |
| ej118 | PBX2   | K08 |
| ej119 | PBX3** | K09 |
| ej120 | PBX4   | K10 |
| ej121 | PDX1   | K11 |

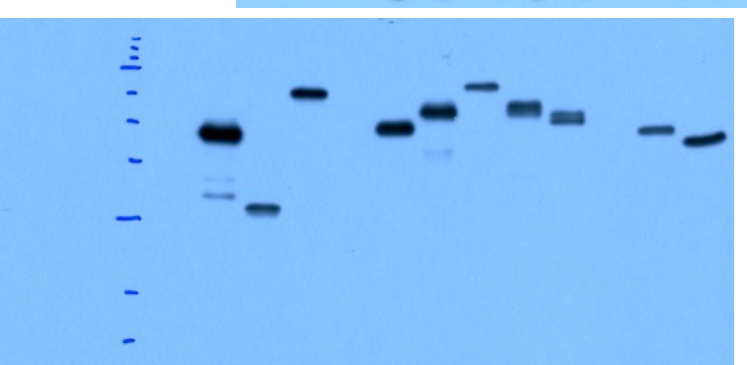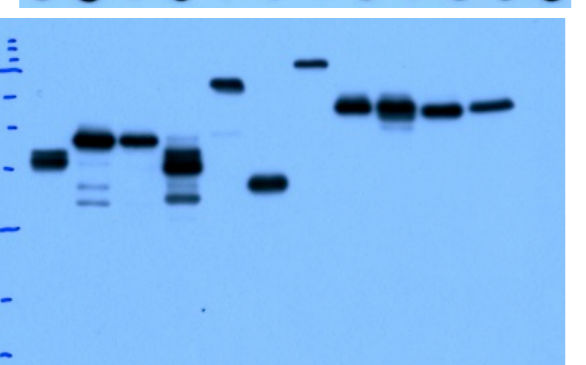

\*Isoform w/o HD  
\*\*No expression

### GT1-7

089-110

|       |        |     |
|-------|--------|-----|
| ej089 | MEIS3  | I01 |
| ej090 | MEIS3  | I02 |
| ej091 | MEOX1  | I03 |
| ej092 | MEOX2  | I04 |
| ej093 | MIXL1  | I05 |
| ej094 | MKX    | I06 |
| ej095 | MSX1   | I07 |
| ej096 | NANOG  | I08 |
| ej097 | NKX2-1 | I09 |
| ej098 | NKX2-2 | I10 |
| ej099 | NKX2-3 | I11 |

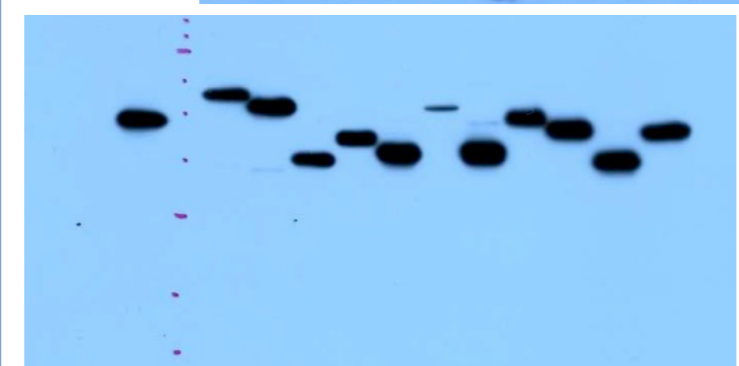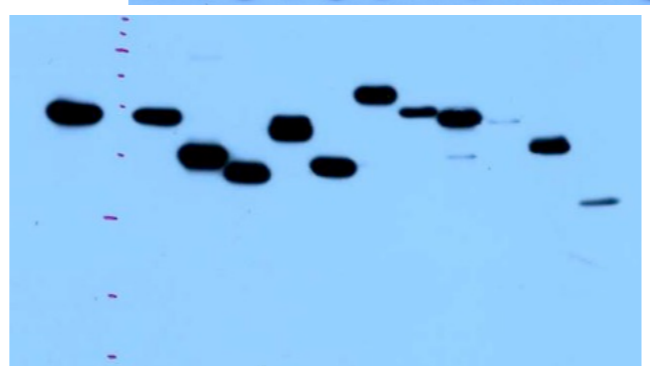

111-132

|       |        |     |
|-------|--------|-----|
| ej111 | PAX3*  | K01 |
| ej112 | PAX3   | K02 |
| ej113 | PAX4** | K03 |
| ej114 | PAX5*  | K04 |
| ej115 | PAX6   | K05 |
| ej116 | PAX7   | K06 |
| ej117 | PAX8*  | K07 |
| ej118 | PBX2   | K08 |
| ej119 | PBX3** | K09 |
| ej120 | PBX4   | K10 |
| ej121 | PDX1   | K11 |

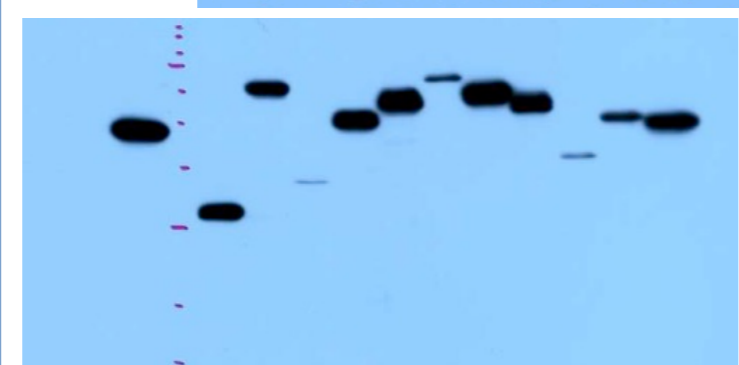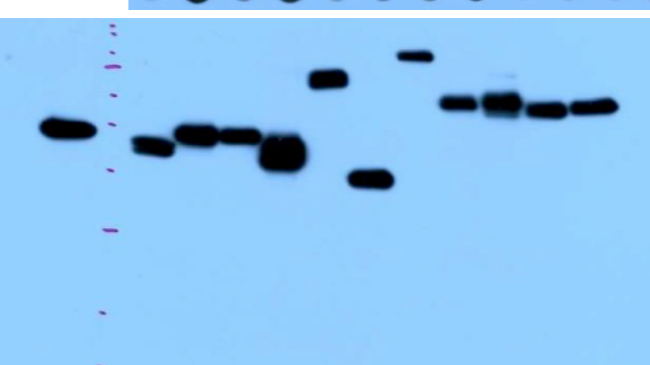

\*Isoform w/o HD  
\*\*No expression

### MDCK

089-110

|       |        |     |
|-------|--------|-----|
| ej089 | MEIS3  | I01 |
| ej090 | MEIS3  | I02 |
| ej091 | MEOX1  | I03 |
| ej092 | MEOX2  | I04 |
| ej093 | MIXL1  | I05 |
| ej094 | MKX    | I06 |
| ej095 | MSX1   | I07 |
| ej096 | NANOG  | I08 |
| ej097 | NKX2-1 | I09 |
| ej098 | NKX2-2 | I10 |
| ej099 | NKX2-3 | I11 |

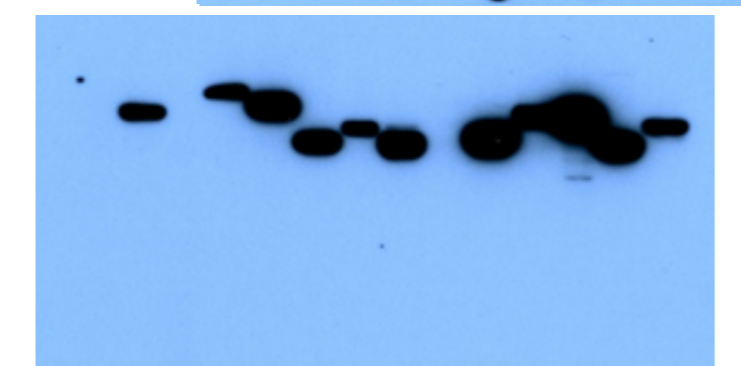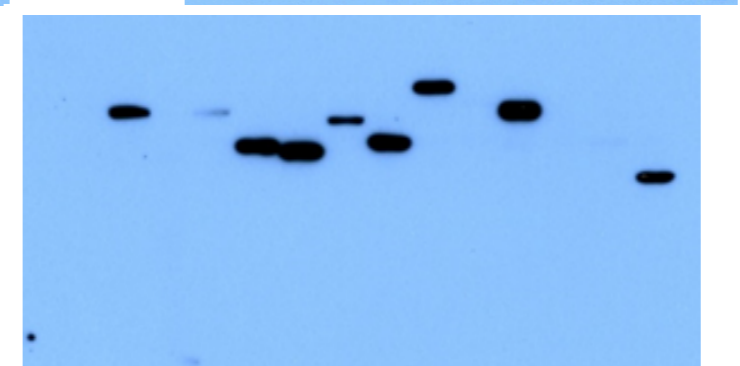

111-132

|       |        |     |
|-------|--------|-----|
| ej111 | PAX3*  | K01 |
| ej112 | PAX3   | K02 |
| ej113 | PAX4** | K03 |
| ej114 | PAX5*  | K04 |
| ej115 | PAX6   | K05 |
| ej116 | PAX7   | K06 |
| ej117 | PAX8*  | K07 |
| ej118 | PBX2   | K08 |
| ej119 | PBX3** | K09 |
| ej120 | PBX4   | K10 |
| ej121 | PDX1   | K11 |

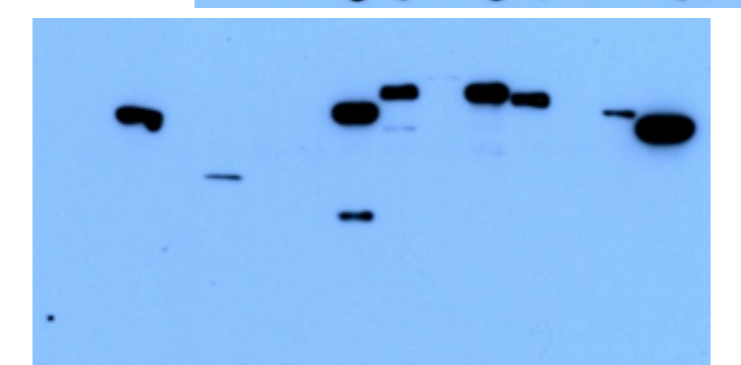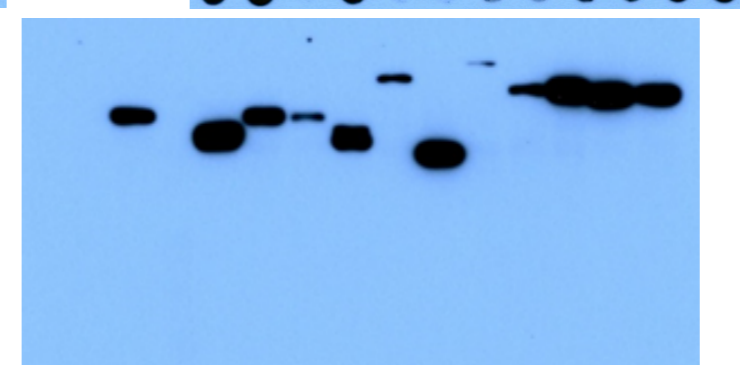

\*Isoform w/o HD  
\*\*No expression

### HeLa

089-110

|       |        |     |
|-------|--------|-----|
| ej089 | MEIS3a | I01 |
| ej090 | MEIS3b | I02 |
| ej091 | MEOX1  | I03 |
| ej092 | MEOX2  | I04 |
| ej093 | MIXL1  | I05 |
| ej094 | MKX    | I06 |
| ej095 | MSX1   | I07 |
| ej096 | NANOG  | I08 |
| ej097 | NKX2-1 | I09 |
| ej098 | NKX2-2 | I10 |
| ej099 | NKX2-3 | I11 |

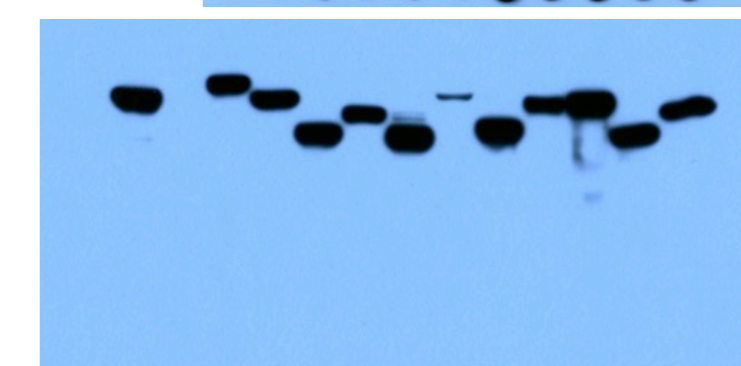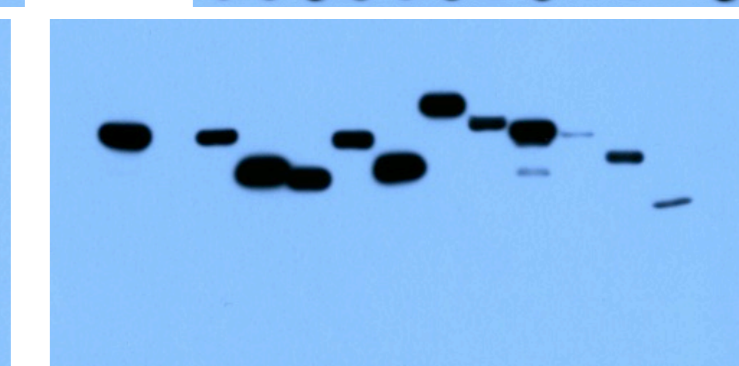

111-132

|       |       |     |
|-------|-------|-----|
| ej111 | PAX3* | K01 |
| ej112 | PAX3  | K02 |
| ej113 | PAX4  | K03 |
| ej114 | PAX5* | K04 |
| ej115 | PAX6  | K05 |
| ej116 | PAX7  | K06 |
| ej117 | PAX8* | K07 |
| ej118 | PBX2  | K08 |
| ej119 | PBX3  | K09 |
| ej120 | PBX4  | K10 |
| ej121 | PDX1  | K11 |

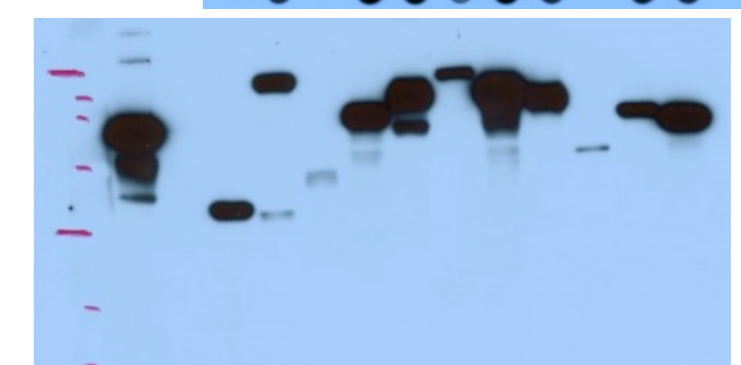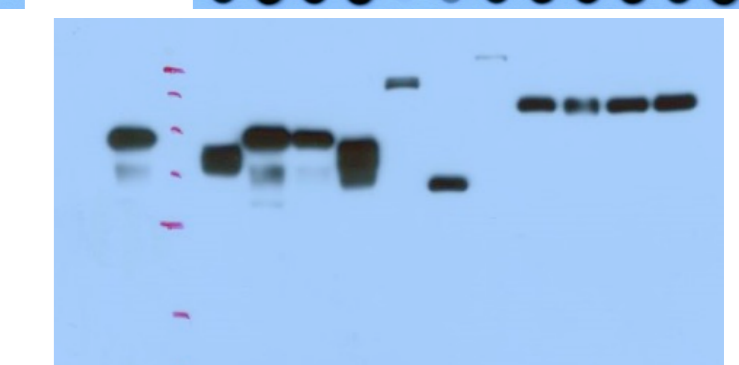

\*Isoform w/o HD  
\*\*Not expressed



### 293T

133-154

|       |         |     |
|-------|---------|-----|
| ej133 | POU4F1  | M01 |
| ej134 | POU4F2  | M02 |
| ej135 | POU4F3a | M03 |
| ej136 | POU4F3b | M04 |
| ej137 | POU5F1  | M05 |
| ej138 | POU5F2  | M06 |
| ej139 | POU6F1  | M07 |
| ej140 | HOXC12  | M08 |
| ej141 | PROX1   | M09 |
| ej142 | PRRX1   | M10 |
| ej143 | PRRX2   | M11 |

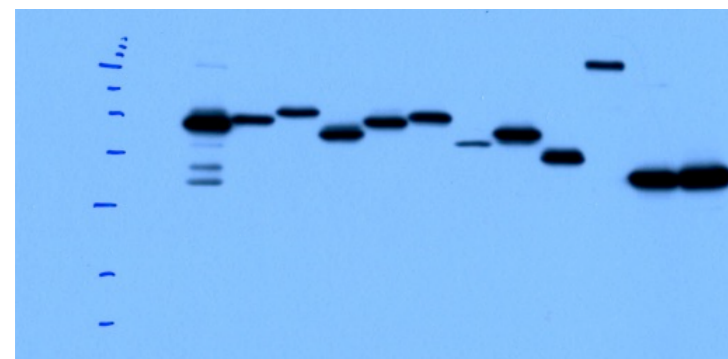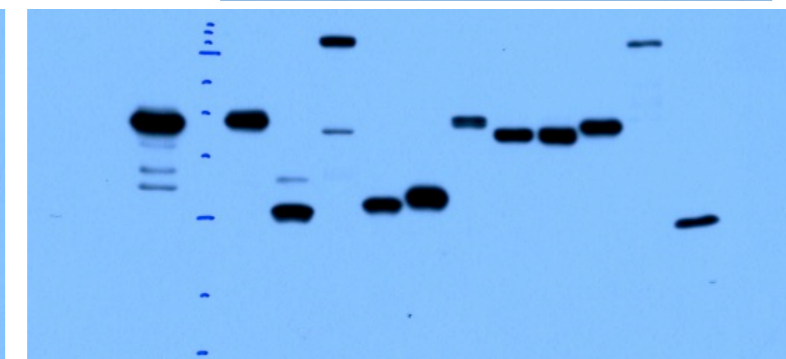

|       |       |     |
|-------|-------|-----|
| ej144 | RAX   | N01 |
| ej145 | RAX2  | N02 |
| ej146 | SATB2 | N03 |
| ej147 | SEBOX | N04 |
| ej148 | SHOX  | N05 |
| ej149 | SHOX2 | N06 |
| ej150 | SIX1  | N07 |
| ej151 | SIX2  | N08 |
| ej152 | SIX3  | N09 |
| ej153 | SIX4  | N10 |
| ej154 | SIX5* | N11 |

155-170

|       |         |     |
|-------|---------|-----|
| ej155 | SIX6    | O01 |
| ej156 | TGIF1   | O02 |
| ej157 | TGIF2   | O03 |
| ej158 | TGIF2LX | O04 |
| ej159 | TGIF2LY | O05 |
| ej160 | TLX1    | O06 |
| ej161 | TLX2    | O07 |
| ej162 | TLX3    | O08 |

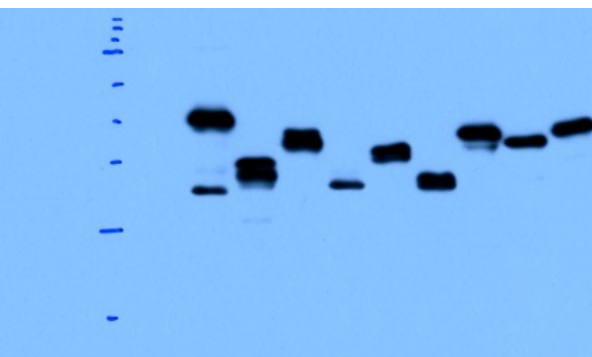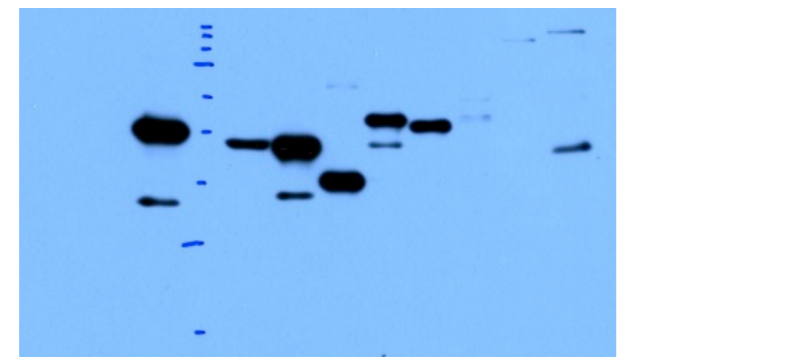

|       |       |     |
|-------|-------|-----|
| ej163 | VAX1  | O09 |
| ej164 | VAX2  | O10 |
| ej165 | VENTX | O11 |
| ej166 | VSX1  | P01 |
| ej167 | VSX2  | P02 |
| ej168 | ZEB1  | P03 |
| ej169 | ZFH3* | P04 |
| ej170 | ZHX3  | P05 |

\*Isoform w/o HD  
\*\*No expression

### GT1-7

133-154

|       |         |     |
|-------|---------|-----|
| ej133 | POU4F1  | M01 |
| ej134 | POU4F2  | M02 |
| ej135 | POU4F3a | M03 |
| ej136 | POU4F3b | M04 |
| ej137 | POU5F1  | M05 |
| ej138 | POU5F2  | M06 |
| ej139 | POU6F1  | M07 |
| ej140 | HOXC12  | M08 |
| ej141 | PROX1   | M09 |
| ej142 | PRRX1   | M10 |
| ej143 | PRRX2   | M11 |

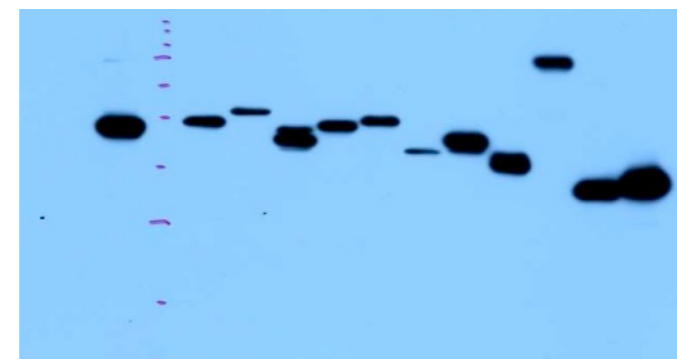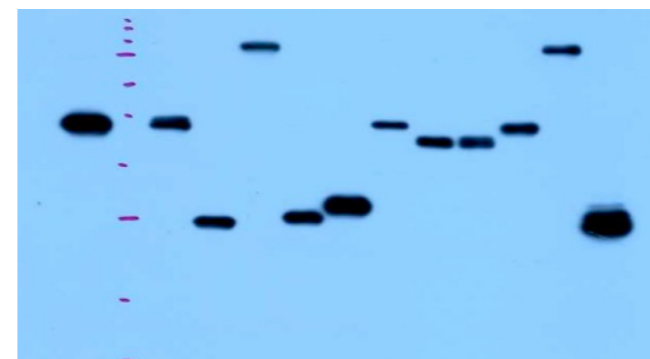

|       |       |     |
|-------|-------|-----|
| ej144 | RAX   | N01 |
| ej145 | RAX2  | N02 |
| ej146 | SATB2 | N03 |
| ej147 | SEBOX | N04 |
| ej148 | SHOX  | N05 |
| ej149 | SHOX2 | N06 |
| ej150 | SIX1  | N07 |
| ej151 | SIX2  | N08 |
| ej152 | SIX3  | N09 |
| ej153 | SIX4  | N10 |
| ej154 | SIX5* | N11 |

|       |         |     |
|-------|---------|-----|
| ej155 | SIX6    | O01 |
| ej156 | TGIF1   | O02 |
| ej157 | TGIF2   | O03 |
| ej158 | TGIF2LX | O04 |
| ej159 | TGIF2LY | O05 |
| ej160 | TLX1    | O06 |
| ej161 | TLX2    | O07 |
| ej162 | TLX3    | O08 |
| ej163 | VAX1    | O09 |
| ej164 | VAX2    | O10 |
| ej165 | VENTX   | O11 |

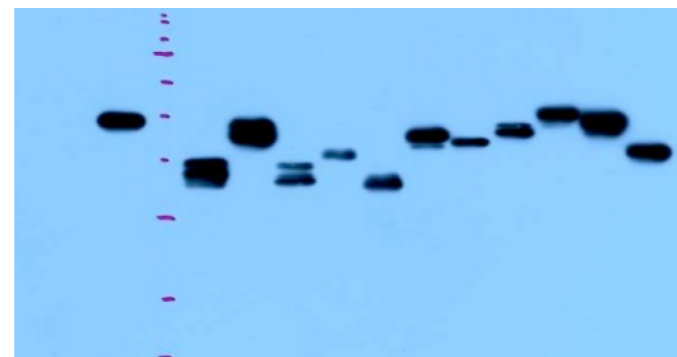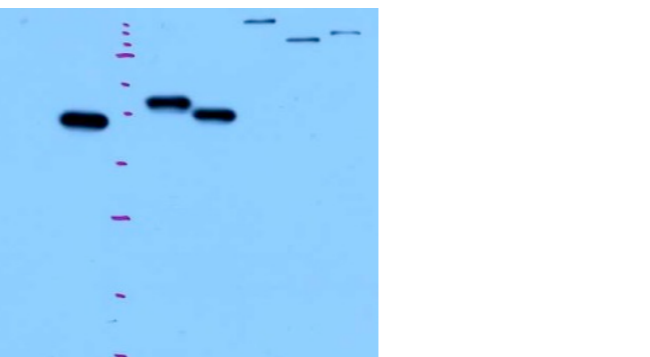

|       |       |     |
|-------|-------|-----|
| ej166 | VSX1  | P01 |
| ej167 | VSX2  | P02 |
| ej168 | ZEB1  | P03 |
| ej169 | ZFH3* | P04 |
| ej170 | ZHX3  | P05 |
|       |       |     |
|       |       |     |
|       |       |     |
|       |       |     |

\*Isoform w/o HD  
\*\*No expression

### MDCK

133-154

|       |         |     |
|-------|---------|-----|
| ej133 | POU4F1  | M01 |
| ej134 | POU4F2  | M02 |
| ej135 | POU4F3a | M03 |
| ej136 | POU4F3b | M04 |
| ej137 | POU5F1  | M05 |
| ej138 | POU5F2  | M06 |
| ej139 | POU6F1  | M07 |
| ej140 | HOXC12  | M08 |
| ej141 | PROX1   | M09 |
| ej142 | PRRX1   | M10 |
| ej143 | PRRX2   | M11 |

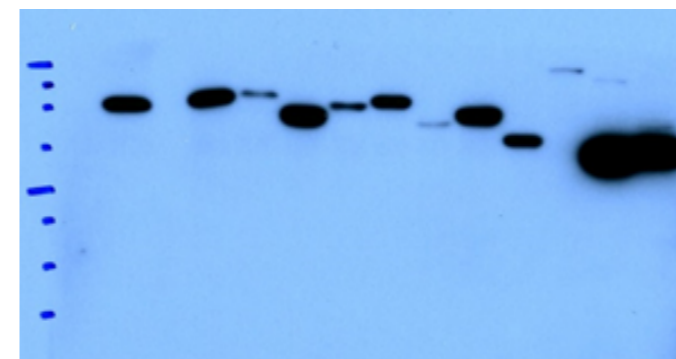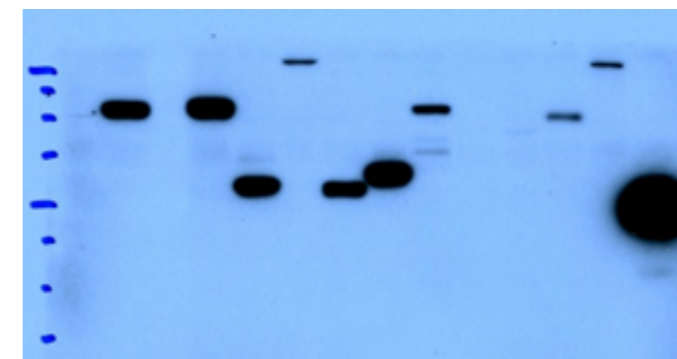

|       |       |     |
|-------|-------|-----|
| ej144 | RAX   | N01 |
| ej145 | RAX2  | N02 |
| ej146 | SATB2 | N03 |
| ej147 | SEBOX | N04 |
| ej148 | SHOX  | N05 |
| ej149 | SHOX2 | N06 |
| ej150 | SIX1  | N07 |
| ej151 | SIX2  | N08 |
| ej152 | SIX3  | N09 |
| ej153 | SIX4  | N10 |
| ej154 | SIX5* | N11 |

|       |         |     |
|-------|---------|-----|
| ej155 | SIX6    | O01 |
| ej156 | TGIF1   | O02 |
| ej157 | TGIF2   | O03 |
| ej158 | TGIF2LX | O04 |
| ej159 | TGIF2LY | O05 |
| ej160 | TLX1    | O06 |
| ej161 | TLX2    | O07 |
| ej162 | TLX3    | O08 |
| ej163 | VAX1    | O09 |
| ej164 | VAX2    | O10 |
| ej165 | VENTX   | O11 |

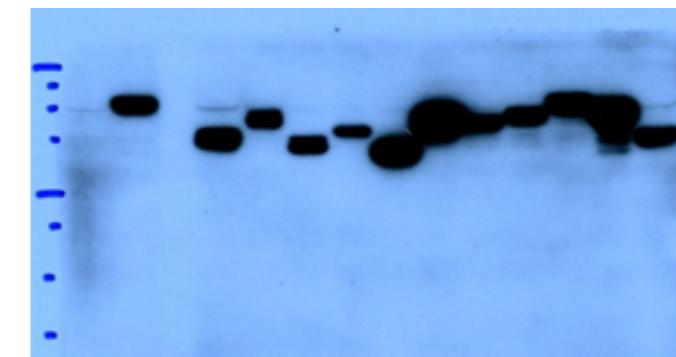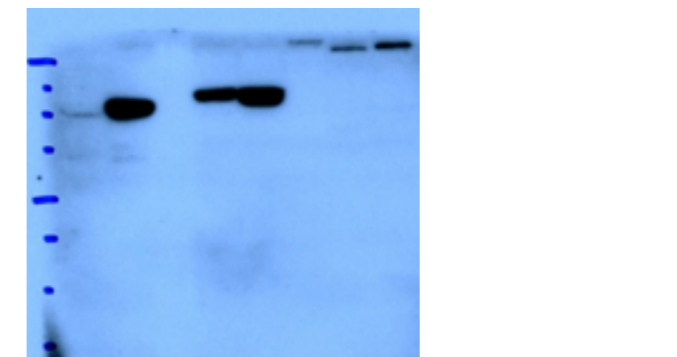

|       |       |     |
|-------|-------|-----|
| ej166 | VSX1  | P01 |
| ej167 | VSX2  | P02 |
| ej168 | ZEB1  | P03 |
| ej169 | ZFH3* | P04 |
| ej170 | ZHX3  | P05 |
|       |       |     |
|       |       |     |
|       |       |     |
|       |       |     |

\*Isoform w/o HD  
\*\*No expression

### HeLa

133-154

|       |         |     |
|-------|---------|-----|
| ej133 | POU4F1  | M01 |
| ej134 | POU4F2  | M02 |
| ej135 | POU4F3a | M03 |
| ej136 | POU4F3b | M04 |
| ej137 | POU5F1  | M05 |
| ej138 | POU5F2  | M06 |
| ej139 | POU6F1  | M07 |
| ej140 | HOXC12  | M08 |
| ej141 | PROX1   | M09 |
| ej142 | PRRX1   | M10 |
| ej143 | PRRX2   | M11 |

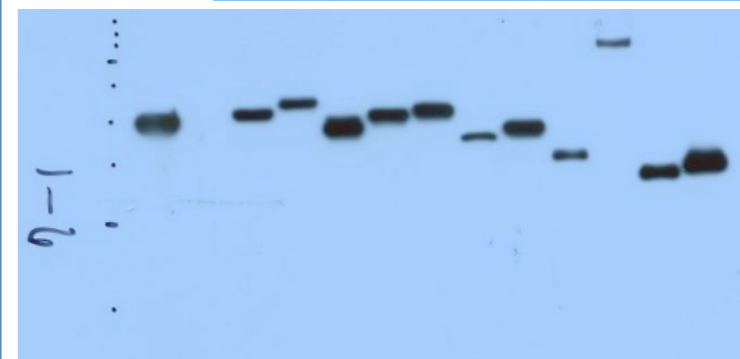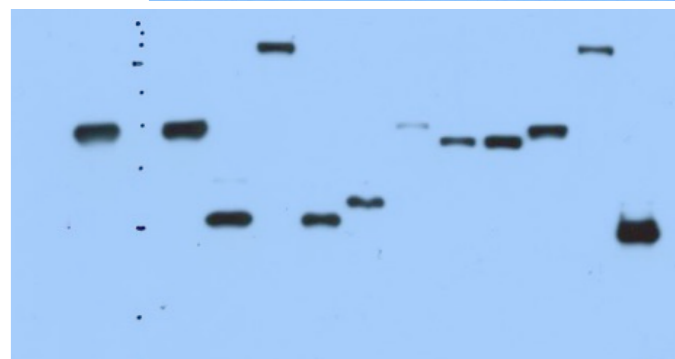

|       |       |     |
|-------|-------|-----|
| ej144 | RAX   | N01 |
| ej145 | RAX2  | N02 |
| ej146 | SATB2 | N03 |
| ej147 | SEBOX | N04 |
| ej148 | SHOX  | N05 |
| ej149 | SHOX2 | N06 |
| ej150 | SIX1  | N07 |
| ej151 | SIX2  | N08 |
| ej152 | SIX3  | N09 |
| ej153 | SIX4  | N10 |
| ej154 | SIX5* | N11 |

|       |         |     |
|-------|---------|-----|
| ej155 | SIX6    | O01 |
| ej156 | TGIF1   | O02 |
| ej157 | TGIF2   | O03 |
| ej158 | TGIF2LX | O04 |
| ej159 | TGIF2LY | O05 |
| ej160 | TLX1    | O06 |
| ej161 | TLX2    | O07 |
| ej162 | TLX3    | O08 |
| ej163 | VAX1    | O09 |
| ej164 | VAX2    | O10 |
| ej165 | VENTX   | O11 |

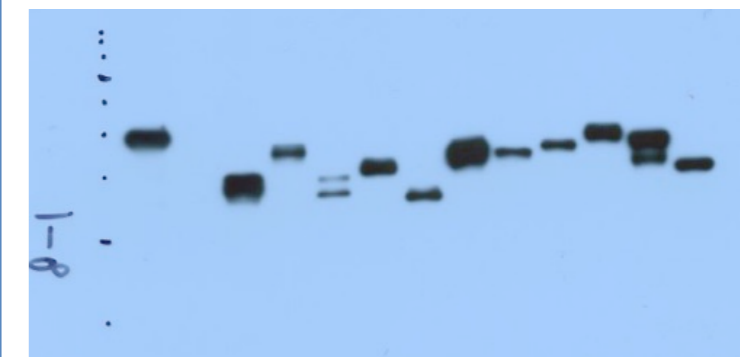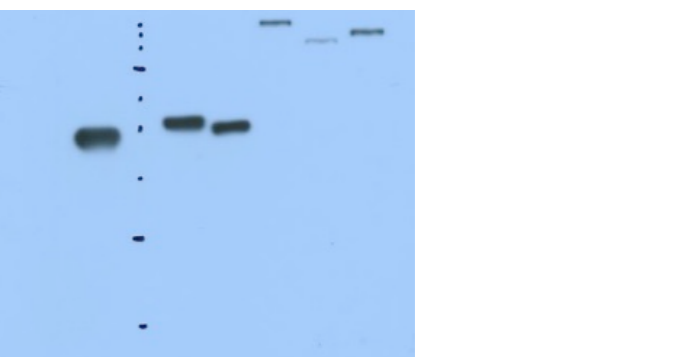

|       |       |     |
|-------|-------|-----|
| ej166 | VSX1  | P01 |
| ej167 | VSX2  | P02 |
| ej168 | ZEB1  | P03 |
| ej169 | ZFH3* | P04 |
| ej170 | ZHX3  | P05 |
|       |       |     |
|       |       |     |
|       |       |     |
|       |       |     |

\*Isoform w/o HD  
\*\*Not expressed
